# Supplementary material for: The Problem of Relations: A Rejoinder to Bradley
Source: HighWire-hosted journal article supplement (doi:10.1101/gr.278297.123), 1965-01-01
Supplement: Supplemental_Fig_S1.pdf [file Supplemental_Fig_S1.pdf]

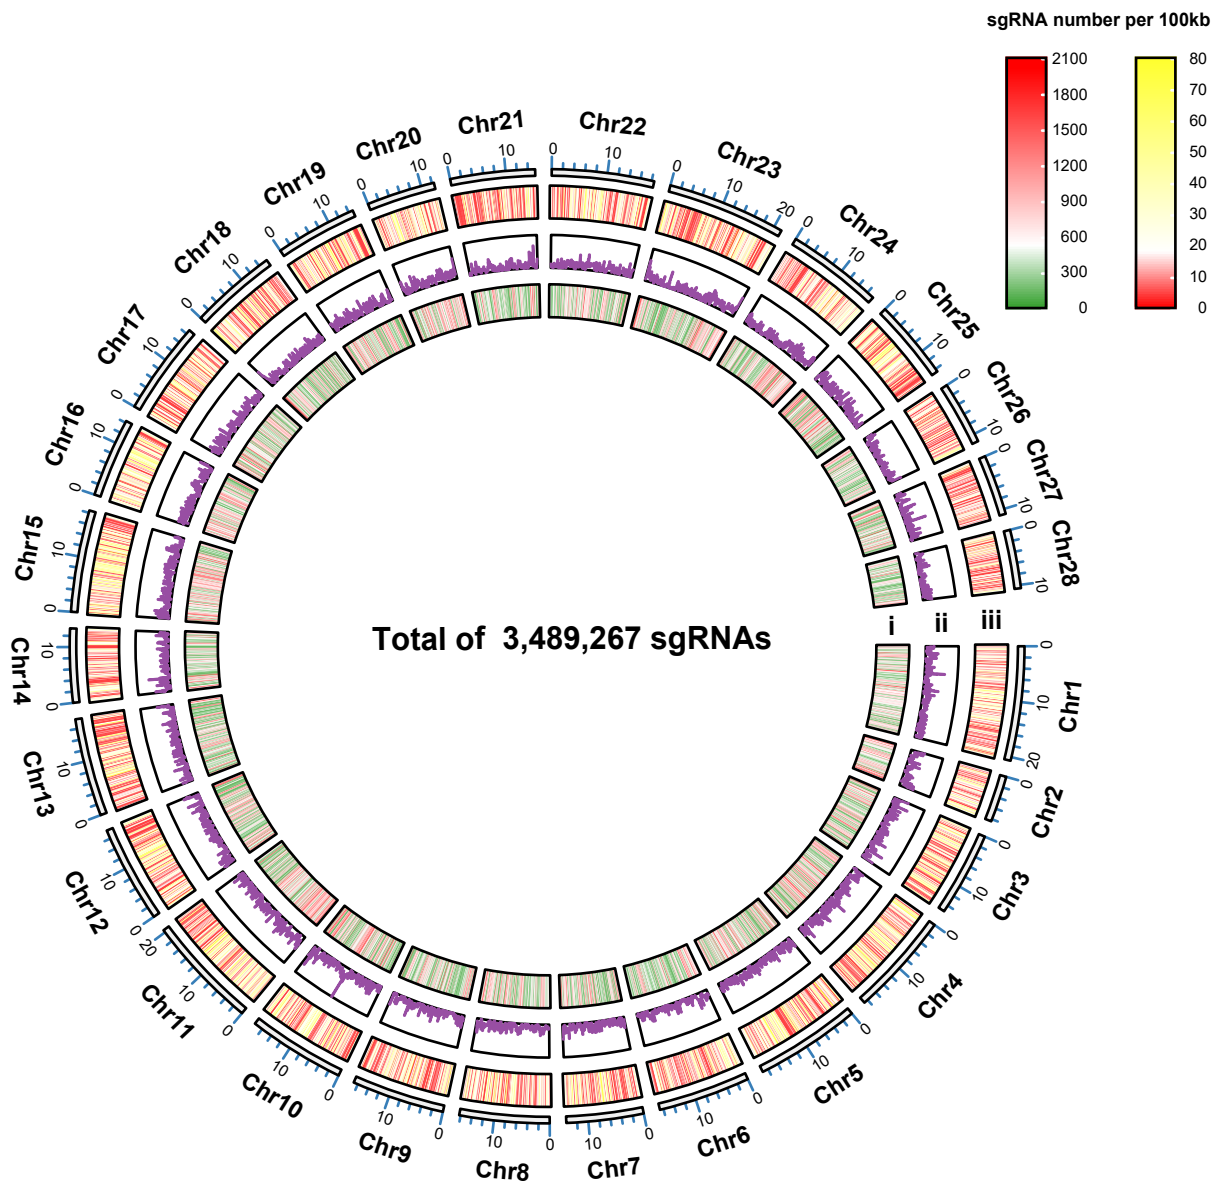

**Supplemental Fig S1. Statistics of genome-wide sgRNA number.** The number of sgRNA in exons and 500 bp upstream of transcription starting site, and their genomewide distributions. A total of 3,489,264 sgRNAs are present at these genomic loci, and the heat map (i) and line graph (ii) in the circos plot show the number of these p200-lib s on each chromosome. Circos tracks are summed in 100kb windows. (iii) The heat map show the sgRNA distributions of p200-lib sgRNA library.
