# Supplementary material for: The Problem of Relations: A Rejoinder to Bradley
Source: HighWire-hosted journal article supplement (doi:10.1101/gr.278297.123), 1965-01-01
Supplement: Supplemental_Fig_S6.pdf [file Supplemental_Fig_S6.pdf]

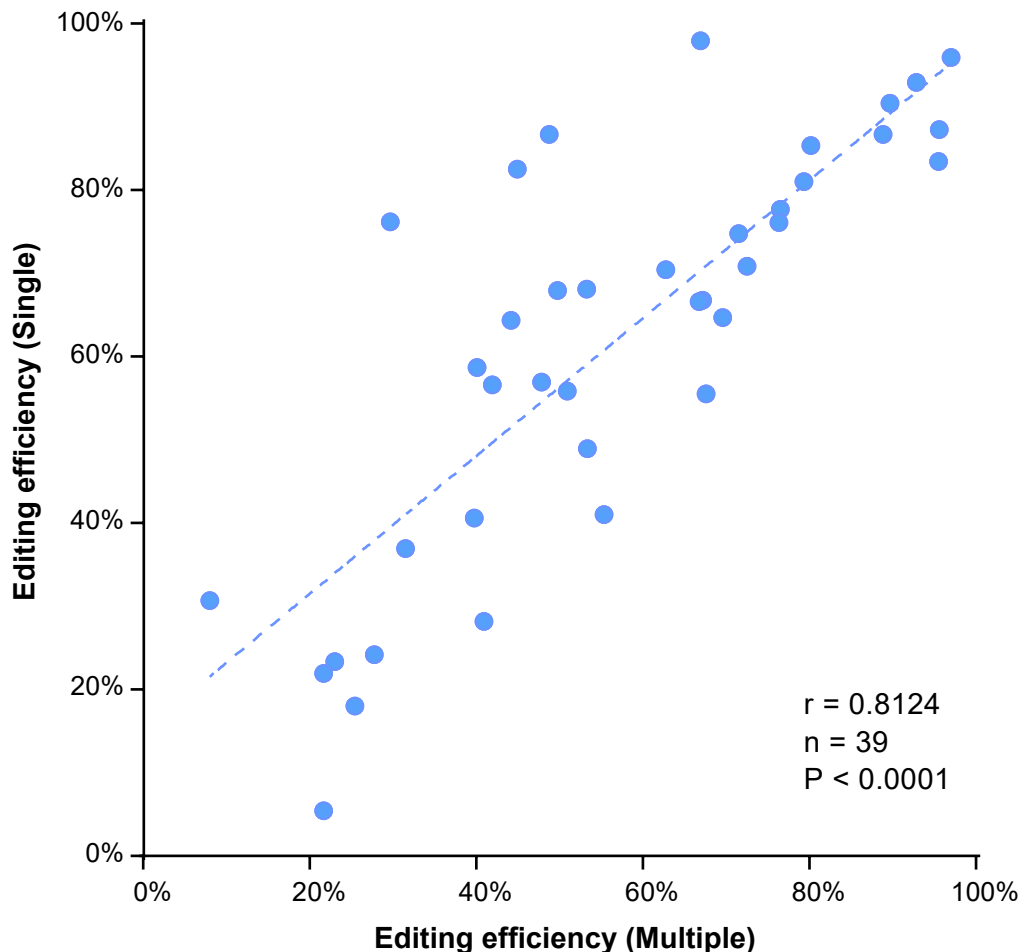

**Supplemental Fig S6. Correlation between sgRNA editing efficiency in multiple sgRNA animal (Multiple) and single sgRNA animal (Single).** The x-axis presents editing efficiency of each single sgRNA in multiple sgRNA individuals, and the y-axis presents their editing efficiency in single sgRNA individuals.
