# Supplementary material for: The Problem of Relations: A Rejoinder to Bradley
Source: HighWire-hosted journal article supplement (doi:10.1101/gr.278297.123), 1965-01-01
Supplement: Supplemental_Fig_S8.pdf [file Supplemental_Fig_S8.pdf]

### N-13-1 KWMTBOMO11394

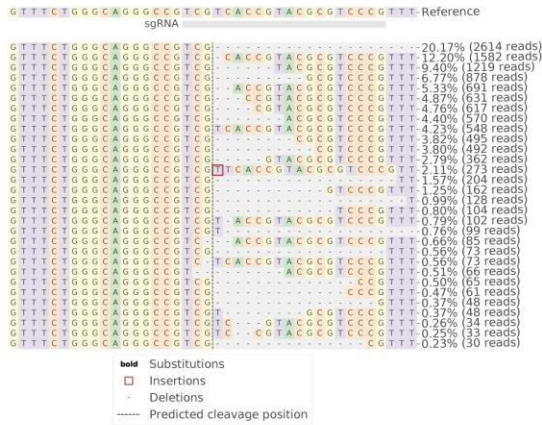

### N-16-1 KWMTBOMO04918

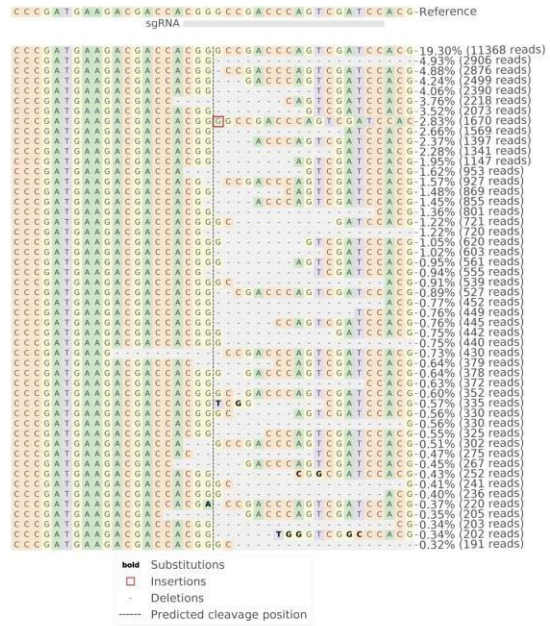

### N-24-1 KWMTBOMO07119

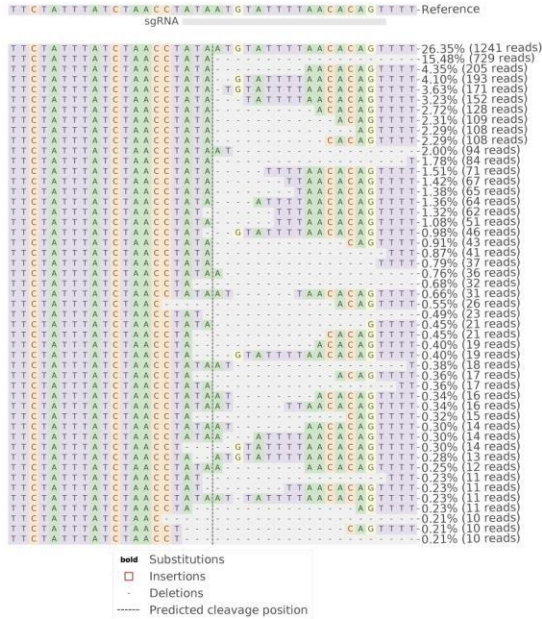

### N-24-1 KWMTBOMO12000

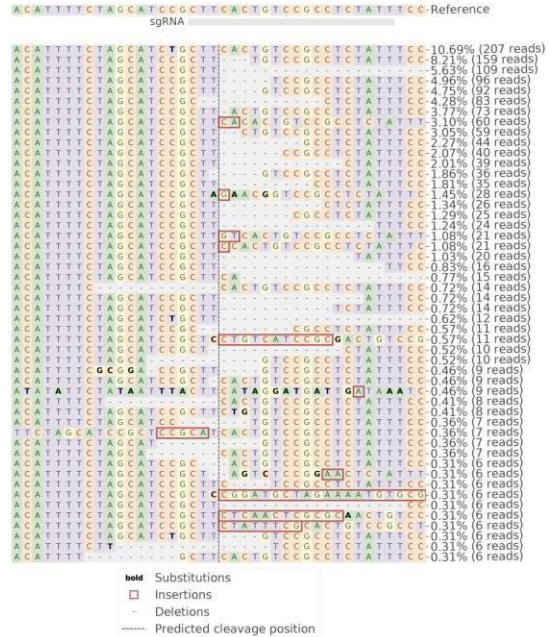



## N-24-2 KWMTBOMO12000

sgRNA Reference

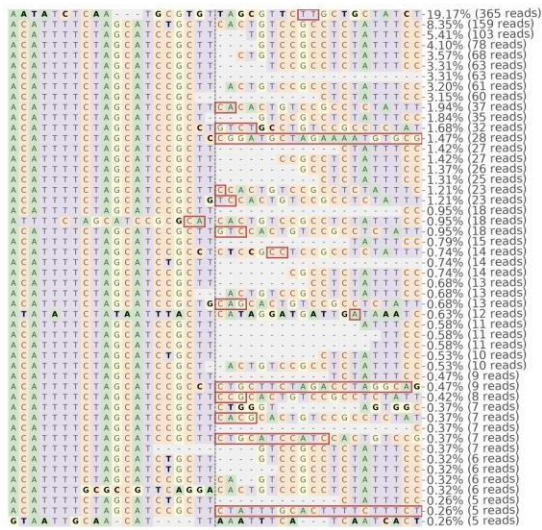

## N-54-2 KWMTBOMO00711

sgRNA Reference

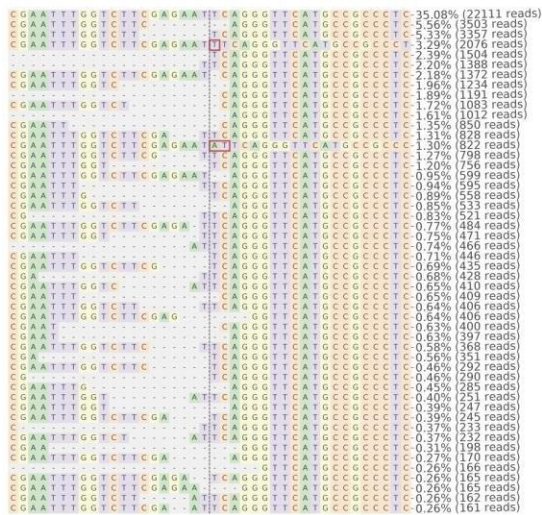

## N-44 KWMTBOMO07119

sgRNA Reference

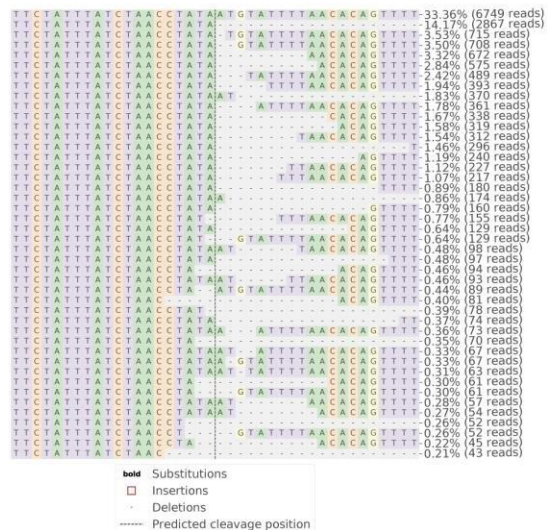

## N-65-1 KWMTBOMO03319

sgRNA Reference

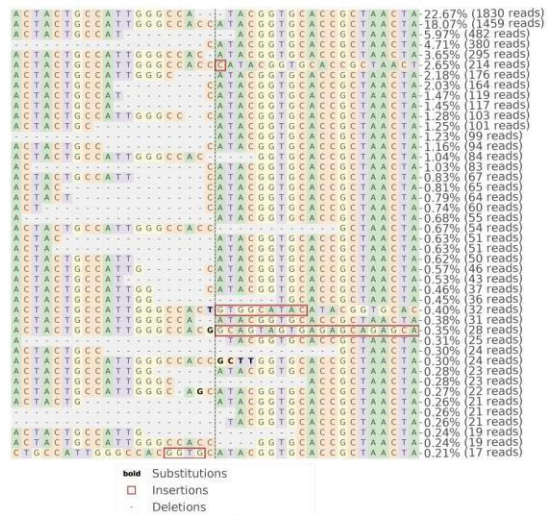



GCGAGTCCCTGGACCCGATGGGGGCGGCCGCCCGGATGCAG-Reference  
sgRNA

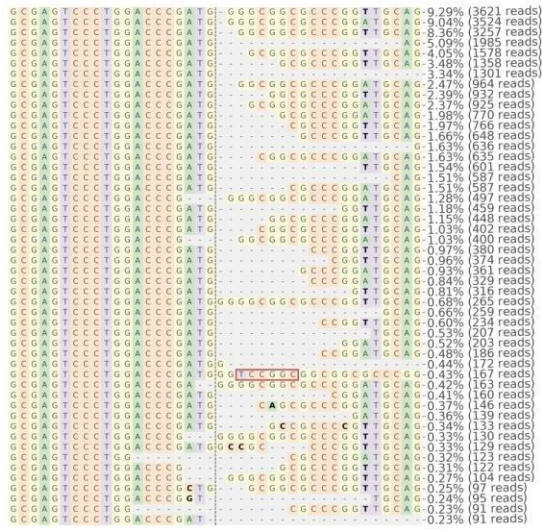

- bold** Substitutions
- Insertions
- Deletions
- Predicted cleavage position

ACTGTGCGCCGAGTGTGTGCGTGACGGCCACGGTATGTTGT-Reference  
sgRNA

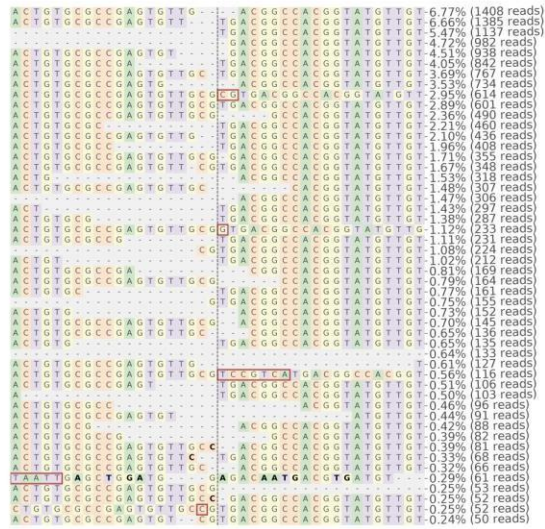

- bold** Substitutions
- Insertions
- Deletions
- Predicted cleavage position

TCATCTCTTGATAACCTTCTTCAGAGAGTTGATATGCATT-Reference  
sgRNA

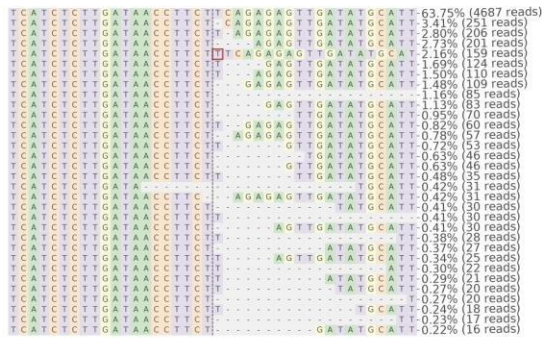

- Substitutions**
- Insertions
- Deletions
- Predicted cleavage position

AAGTTACGCACTGTCGCGACTGGCCCTGCTCGAGTCTG-Reference  
sgRNA

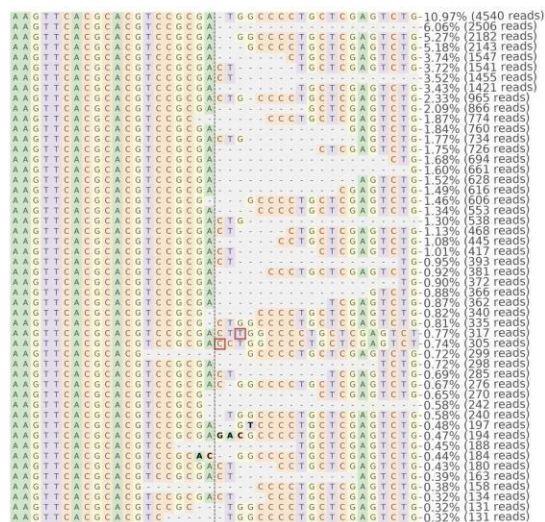

- bold** Substitutions
-  Insertions
-  Deletions
-  Predicted cleavage position



N-130-2 KWMTBOMO06044

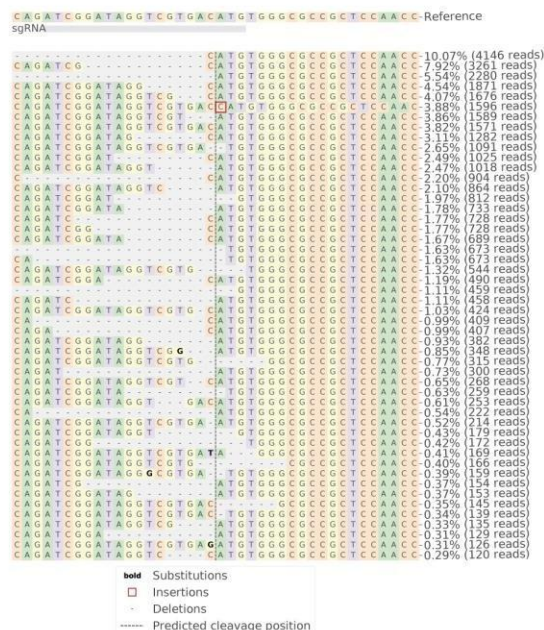

N-152-1 KWMTBOMO15293

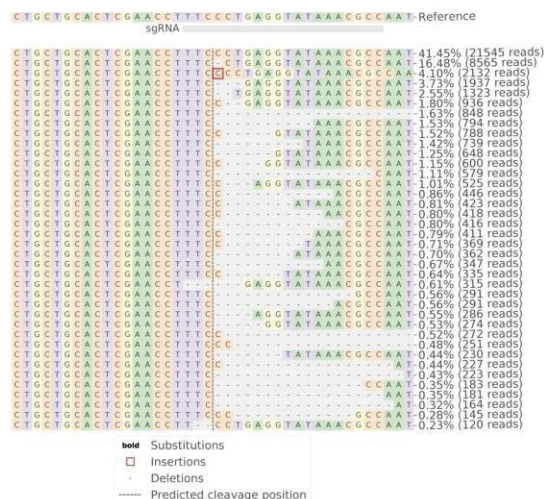

N-160-1 KWMTBOMO06407

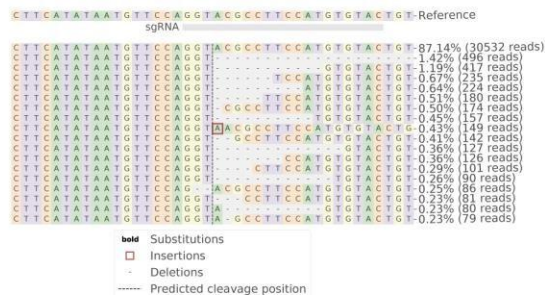

N-175-1 KWMTBOMO01862

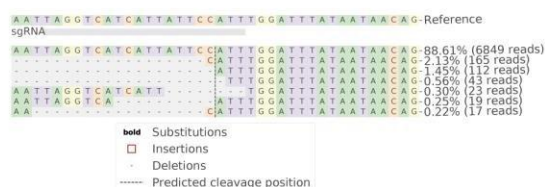



### N-195-2 KWMTBOMO01805

CTTGTTC AATTTCACACAGATGATGGCAAGCTTTGGCCAA-Reference  
sgRNA

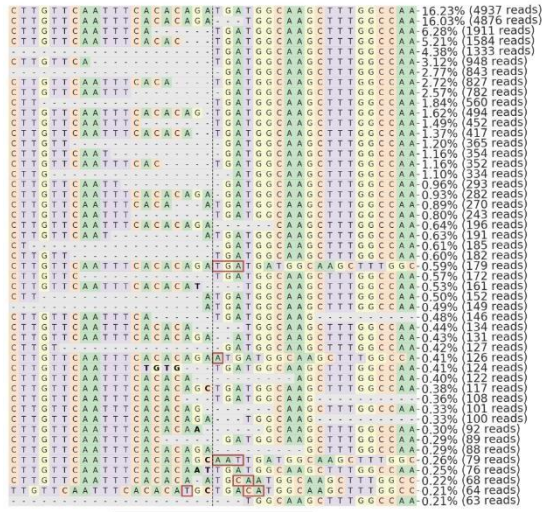

**bold** Substitutions  
Insertions  
Deletions  
----- Predicted cleavage position

### N-204-1 KWMTBOMO06524

CATCTCCGAGAGCGAGGCCATAGCAGGCGTATAGCCGTGAA-Reference  
sgRNA

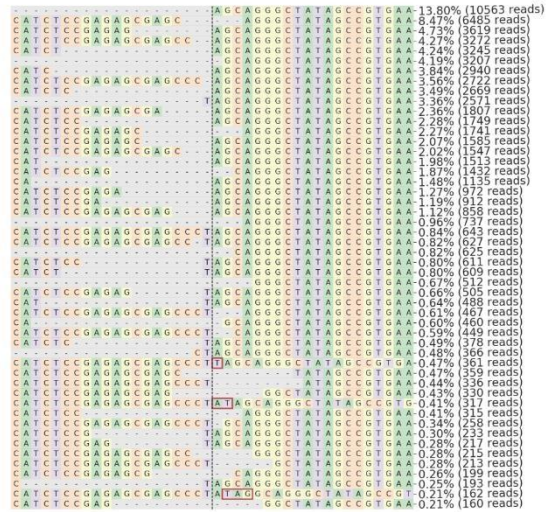

**bold** Substitutions  
Insertions  
Deletions  
----- Predicted cleavage position

### N-221-2 KWMTBOMO05783

GCCGATTACCTTTGTTTAACTGTAGGTGTGAAAAACAA-Reference  
sgRNA

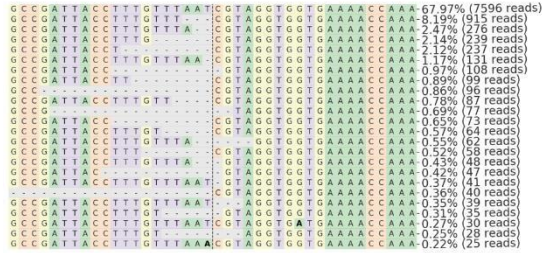

**bold** Substitutions  
Insertions  
Deletions  
----- Predicted cleavage position

### N-223 KWMTBOMO11741

ATGTAACTGAGAAAGCCTCCTTCAAGTATTGAAGGATTG-Reference  
sgRNA

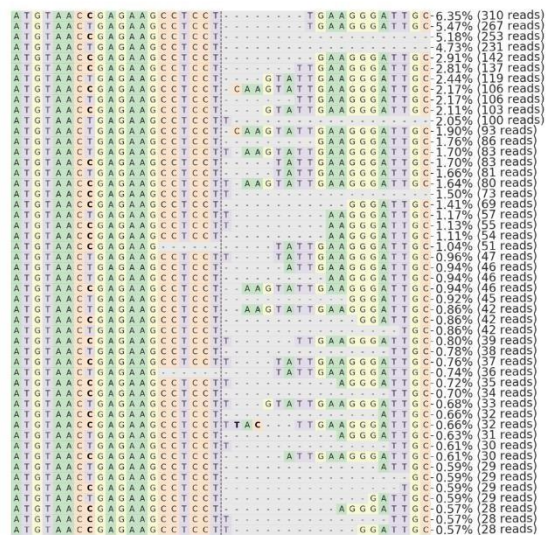

**bold** Substitutions  
Insertions  
Deletions  
----- Predicted cleavage position



### N-233 KWMTBOMO09983

sgRNA

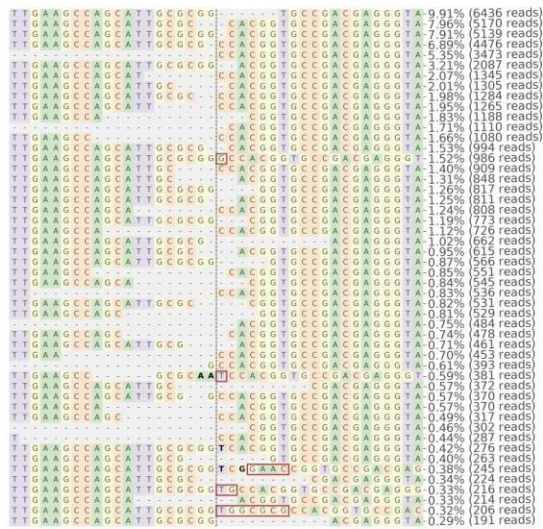

**bold** Substitutions  
 Insertions  
 Deletions  
 Predicted cleavage position

### N-241-2 KWMTBOMO05783

sgRNA

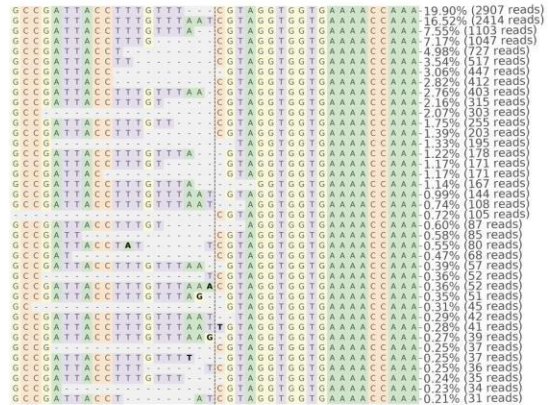

**bold** Substitutions  
 Insertions  
 Deletions  
 Predicted cleavage position

### N-257-1 KWMTBOMO04687\_promoter

sgRNA

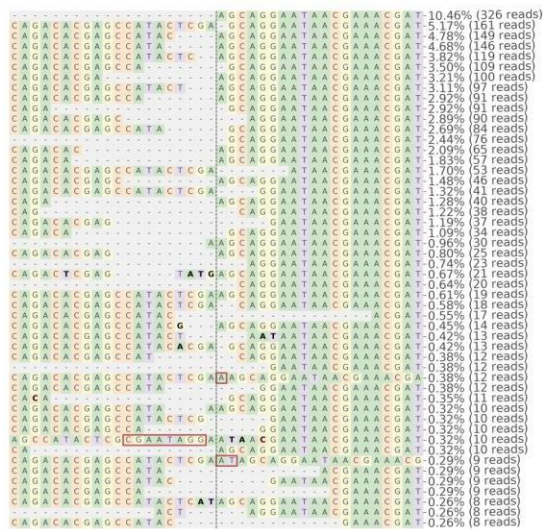

**bold** Substitutions  
 Insertions  
 Deletions  
 Predicted cleavage position

### N-268-2 KWMTBOMO02712

sgRNA

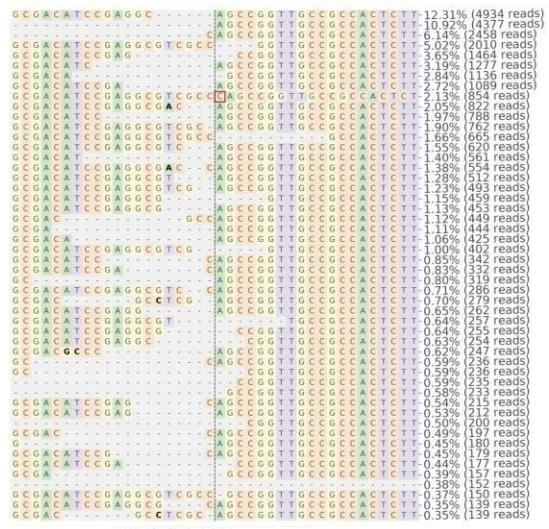

**bold** Substitutions  
 Insertions  
 Deletions  
 Predicted cleavage position



### N-280-3 KWMTBOMO12902

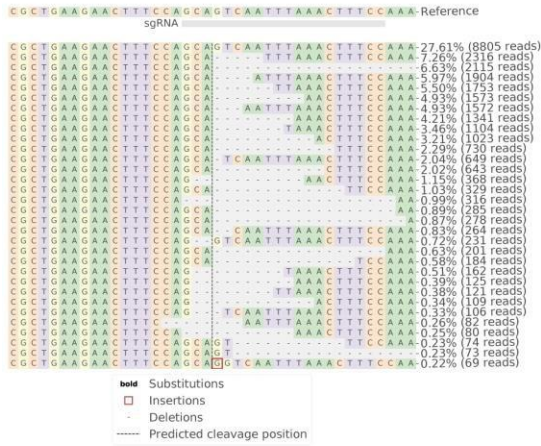

### N-292-1 KWMTBOMO04687

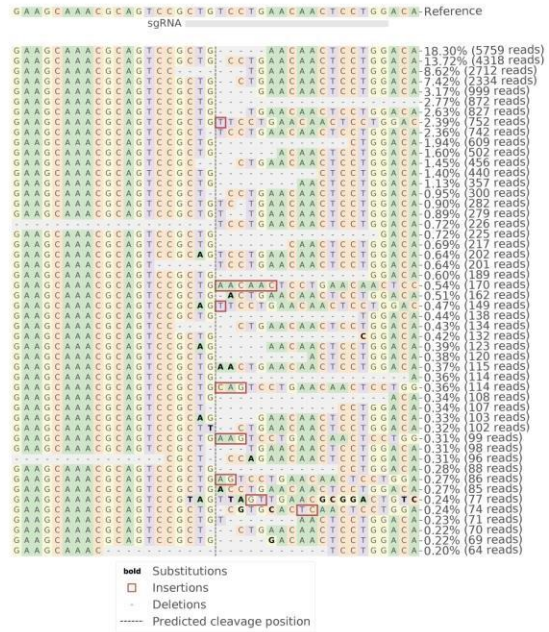

### N-296-1 KWMTBOMO03436

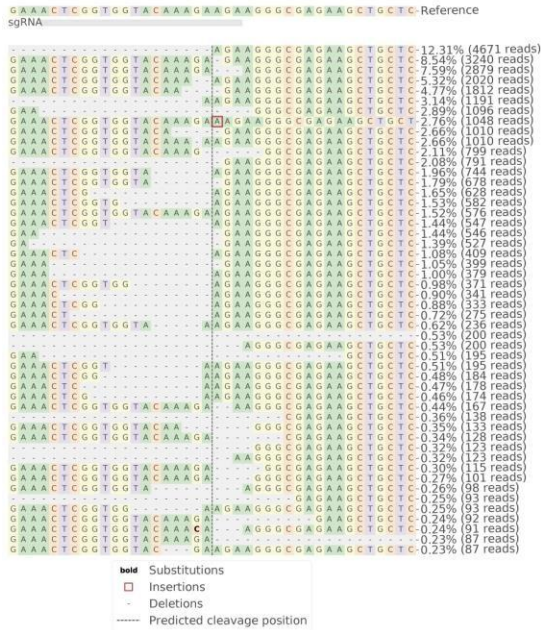

### N-297-2 KWMTBOMO08464

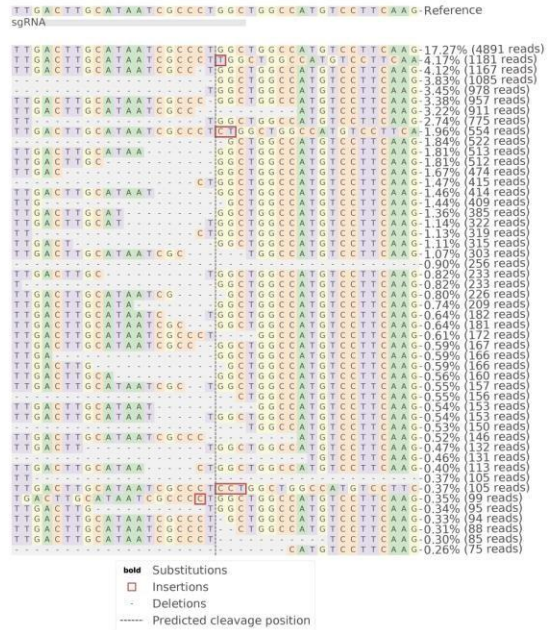



### N-297-2 KWMTBOMO13971

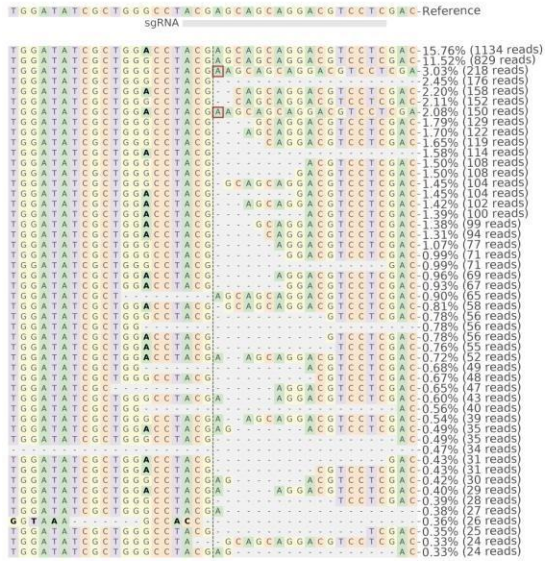

### N-300-1 KWMTBOMO01641

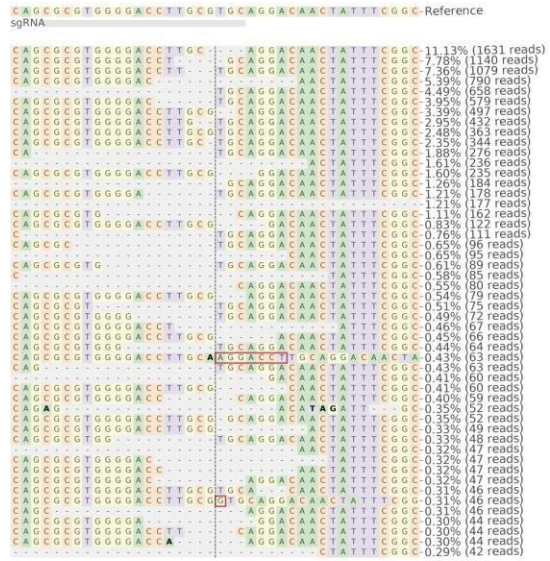

### N-353-1 KWMTBOMO08448

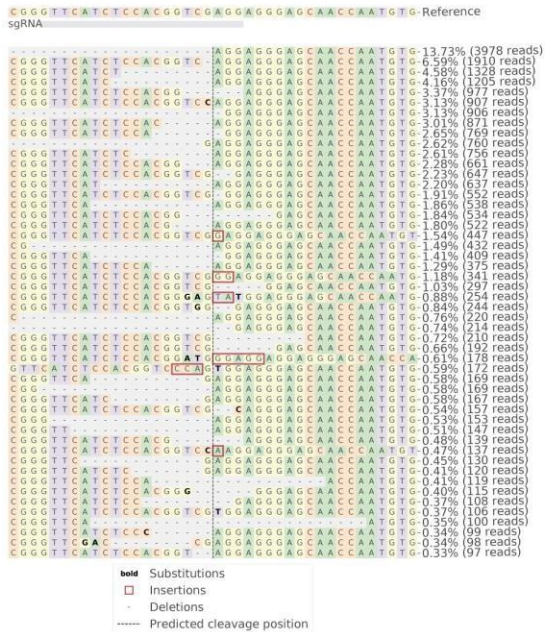

### N-371-2 KWMTBOMO07554

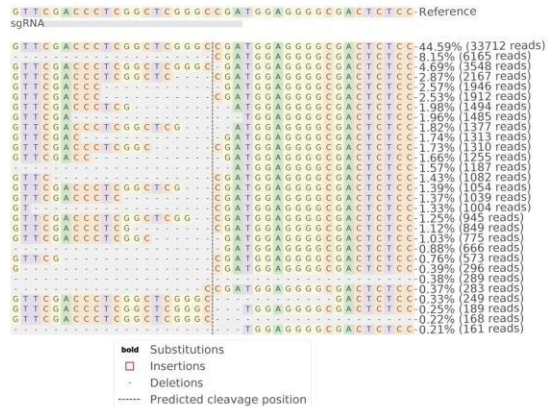

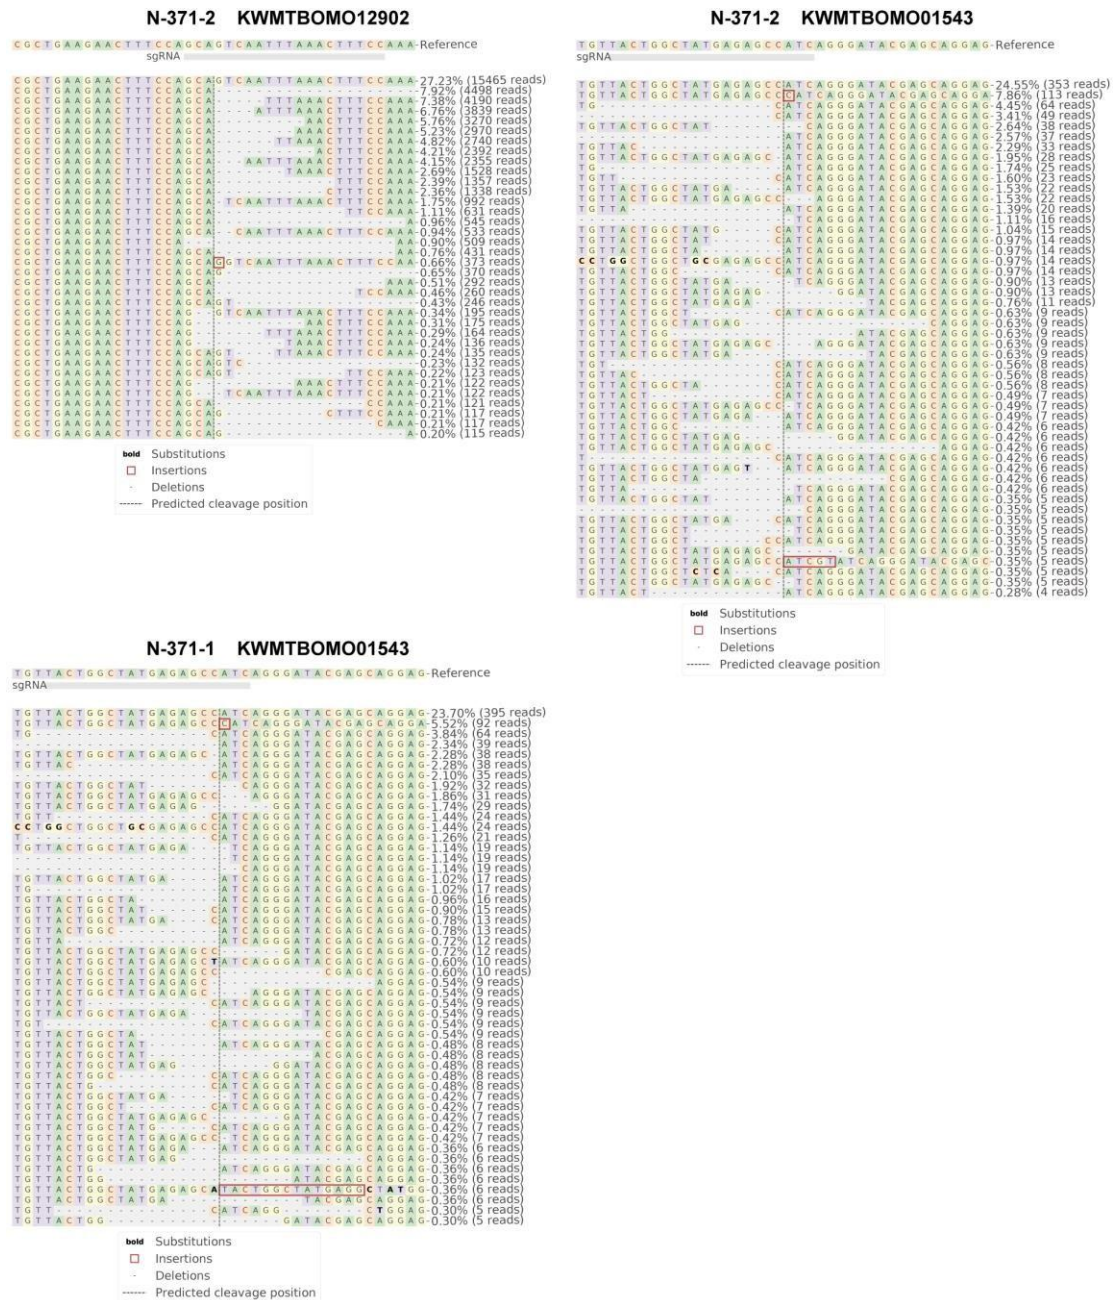

**Supplemental Fig S8. The editing efficiency at target sites of 33 F1 lines.** The top of sequence alignment plot shows the sgRNA and its target gene sequences, the sequences and frequency of edited alleles is shown below.
