# Supplementary material for: The Problem of Relations: A Rejoinder to Bradley
Source: HighWire-hosted journal article supplement (doi:10.1101/gr.278297.123), 1965-01-01
Supplement: Supplemental_Material.docx [file Supplemental_Material.docx]

**Supporting Information for**

**High-throughput and genome-scale targeted mutagenesis using CRISPR in a non-model**

**multicellular organism, *Bombyx mori***

Sanyuan Ma1,*, Tong Zhang1, Ruolin Wang1, Pan Wang1, Yue Liu1,2, Jiasong Chang1,3, Aoming Wang1, Xinhui Lan1, Le Sun1, Hao Sun1, Run Shi1, Wei Lu1, Dan Liu1, Na Zhang1, Wenbo Hu1, Xiaogang Wang1,4, Weiqing Xing1, Ling Jia1, Qingyou Xia1,*.

1 Integrative Science Center of Germplasm Creation in Western China (CHONGQING) Science City, Biological Science Research Center, Southwest University, Chongqing 400716, China

2 Medical Center of Hematology, Xinqiao Hospital, Army Medical University, Chongqing, 400037, China.

3 Key Laboratory of Cellular Physiology, Ministry of Education, Shanxi Medical University, Taiyuan, 030001, China

4 China Chongqing Key Laboratory of Chinese Medicine & Health Science, Chongqing Academy of Chinese Materia Medica, Chongqing 400065, China.

* Correspondence: [masy@swu.edu.cn](mailto:masy@swu.edu.cn), [xiaqy@swu.edu.cn](mailto:xiaqy@swu.edu.cn)

**The Supplemental Material file includes:**

Supplemental_Fig_S1.pdf

Supplemental_Fig_S2.pdf

Supplemental_Fig_S3.pdf

Supplemental_Fig_S4.pdf

Supplemental_Fig_S5.pdf

Supplemental_Fig_S6.pdf

Supplemental_Fig_S7.pdf

Supplemental_Fig_S8.pdf

Supplemental_Fig_S9.pdf

Supplemental_Fig_S10.pdf

Supplemental_Fig_S11.pdf

Supplemental_Table_S1.xlsx

Supplemental_Table_S2.xlsx

Supplemental_Table_S3.xlsx

**Supplemental Figure Legends**

**Supplemental Fig S1.** **Statistics of genome-wide sgRNA number.** The number of sgRNA in exons and 500 bp upstream of transcription starting site, and their genomewide distributions. A total of 3,489,264 sgRNAs are present at these genomic loci, and the heat map (i) and line graph (ii) in the circos plot show the number of these p200-lib s on each chromosome. Circos tracks are summed in 100kb windows. (iii) The heat map show the sgRNA distributions of p200-lib sgRNA library.

**Supplemental Fig S2.** **Phenotypic observation and molecular detection of the target sites in progenies of F1 lines.** (*A*)The silkworm mutant lines of *DHX8* (KWMTBOMO05973), named by Mutant-1. Compared to WT, the larvae of mutant1 showed developmental delay and a little small size. The pie chart shows 46% of 12,149 alleles were edited. The top of sequence alignment plot shows the sgRNA and its target gene sequences, the sequences and frequency of edited alleles is shown below. (*B*) The silkworm mutant lines of *DNA primase large subunit* (KWMTBOMO01805), named by Mutant-2. Compared to WT, the larvae of mutant-2 showed different degrees of developmental delay and the size was obviously smaller. The relatively small individuals cannot cocooning, while the cocoon and pupa of relative large one are significantly smaller than WT. The pie chart shows 82% of 22,422 alleles were edited. The top of sequence alignment plot shows the sgRNA and its target gene sequences, the sequences and frequency of edited alleles is shown below.

**Supplemental Fig S3.** **Overall counts for the editing and none editing events.** Of the 1436 tested silkworms, 89.8% showed detectable editing events.

**Supplemental Fig S4.** **The single nucleotide editing efficiency in the 3’ (*A*) and 5’ (*B*) end (**P* < 0.05, ***P* < 0.01, ****P* < 0.001, *****P* < 0.0001; n.s., not significant; one-way ANOVA with Benjamini-Hochberg post-test multiple comparison).**

**Supplemental Fig S5.** **The dinucleotides editing efficiency in the seed region (**P* < 0.05, ***P* < 0.01, ****P* < 0.001, *****P* < 0.0001; n.s., not significant; one-way ANOVA with Benjamini-Hochberg post-test multiple comparison. Each group was compared to the "ALL" group).**

**Supplemental Fig S6.** **Correlation between sgRNA editing efficiency in multiple sgRNA animal (Multiple) and single sgRNA** **animal (Single).** The x-axis presents editing efficiency of each single sgRNA in multiple sgRNA individuals, and the y-axis presents their editing efficiency in single sgRNA individuals.

**Supplemental Fig S7. Most majority of the insertions are from templated repair.**

**Supplemental Fig S8.** **The editing efficiency at target sites of 33 F1 lines.** The top of sequence alignment plot shows the sgRNA and its target gene sequences, the sequences and frequency of edited alleles is shown below.

**Supplemental Fig S9.** **The cocoon shape of the mutant lines that captured by the ultra-depth three-Dimensional (3D) microscope.** The ultra-depth 3D microscope technique can capture the whole image with a larger field of view by image mosaic function in the case of high magnification. When shooting at high magnification, the whole cocoon sample is out of the shooting range, so it is necessary to separate the cocoon into several areas, and carry out three-dimensional composite photography of different areas by moving the loading platform. Finally, a complete three-dimensional image under high magnification condition is formed by image stitching.

**Supplemental Fig S10.** **Sequencing of the sgRNA target region of KWMTBOMO-12902.**

**Supplemental Fig S11. Overview of how to use the Silkworm Mutant database.** The database provide photographs displaying the phenotypes of the mutants, assisting researchers in their selection of genes and materials of interest. By retrieving the Sample ID, users can access the photographs. By retrieving the silkworm gene ID, users can gain access to functional annotations, such as KO, GO, KOG, Pfam and KEGG enzyme, as well as related PubMed links. Moreover, exons, untranslated regions (UTR), and introns are displayed to provide a viewer with the genomic architecture of the chosen gene. To explore more information about a specific gene, users can simply click on the eFP module, which shows the expression values of selected genes in various tissues during distinct growth phases, represented by different color shades.
