# Supplementary material for: The Problem of Relations: A Rejoinder to Bradley
Source: HighWire-hosted journal article supplement (doi:10.1101/gr.278297.123), 1965-01-01
Supplement: Supplemental_Table_S1.xlsx [file Supplemental_Table_S1.xlsx]

## Sheet: Sheet1
Supplemental Table S1. Summary of the sgRNA sequence
sgRNA ID	sgRNA Sequence	sgRNA Type	Target Sequence	Target Site	Start	End
Bm_sgRNA_03432	AACGTAAAGTTCTGTAATGG	KWMTBOMO00001_exon_1	AACGTAAAGTTCTGTAATGGAGG	KWMTBOMO00001_exon_1	79	102
Bm_sgRNA_34083	CCTCAGACGTGGACAACCTA	KWMTBOMO00001_exon_1	CCTCAGACGTGGACAACCTACGG	KWMTBOMO00001_exon_1	472	495
Bm_sgRNA_62289	GTAAACGTAAAGTTCTGTAA	KWMTBOMO00001_exon_1	GTAAACGTAAAGTTCTGTAATGG	KWMTBOMO00001_exon_1	76	99
Bm_sgRNA_73986	TCACGTAGTTAAATTTAGTC	KWMTBOMO00001_exon_1	TCACGTAGTTAAATTTAGTCAGG	KWMTBOMO00001_exon_1	352	375
Bm_sgRNA_64368	GTCGGGTCCTCGAAACCAGA	KWMTBOMO00001_exon_2	GTCGGGTCCTCGAAACCAGAAGG	KWMTBOMO00001_exon_2	2731	2754
Bm_sgRNA_00389	AAAAGAAAACTCTCGTTCCT	KWMTBOMO00003_exon_3	AAAAGAAAACTCTCGTTCCTCGG	Bomo_Chr1	53711	53734
Bm_sgRNA_46107	GAACGAGAGTTTTCTTTTCC	KWMTBOMO00003_exon_3	GAACGAGAGTTTTCTTTTCCCGG	Bomo_Chr1	53706	53729
Bm_sgRNA_55939	GCTCGTCGTAGAATCTGACG	KWMTBOMO00003_exon_3	GCTCGTCGTAGAATCTGACGAGG	Bomo_Chr1	53565	53588
Bm_sgRNA_81406	TGCCCAGCTCATCCGCCACT	KWMTBOMO00003_exon_3	TGCCCAGCTCATCCGCCACTCGG	Bomo_Chr1	53593	53616
Bm_sgRNA_16303	AGGCGATGACGAGGTGCAAC	KWMTBOMO00003_exon_4	AGGCGATGACGAGGTGCAACTGG	Bomo_Chr1	59294	59317
Bm_sgRNA_49025	GAGATGGACCGCGTGGTGTG	KWMTBOMO00003_exon_4	GAGATGGACCGCGTGGTGTGGGG	Bomo_Chr1	59322	59345
Bm_sgRNA_60562	GGGGCGGCGAGATCCCTGCG	KWMTBOMO00003_exon_4	GGGGCGGCGAGATCCCTGCGCGG	Bomo_Chr1	59379	59402
Bm_sgRNA_89226	TTGCACCTCGTCATCGCCTG	KWMTBOMO00003_exon_4	TTGCACCTCGTCATCGCCTGCGG	Bomo_Chr1	59290	59313
Bm_sgRNA_01312	AAAGAACGCGGCACCGCCAG	KWMTBOMO00005_exon_1	AAAGAACGCGGCACCGCCAGCGG	Bomo_Chr1	118629	118652
Bm_sgRNA_10539	ACGCATGGACGCGCCGCTGG	KWMTBOMO00005_exon_1	ACGCATGGACGCGCCGCTGGCGG	Bomo_Chr1	118616	118639
Bm_sgRNA_19816	ATATGTTGGAGCCGAGCATG	KWMTBOMO00005_exon_1	ATATGTTGGAGCCGAGCATGCGG	Bomo_Chr1	118558	118581
Bm_sgRNA_28273	CAGCAAGCCACGGGTGCCGA	KWMTBOMO00005_exon_1	CAGCAAGCCACGGGTGCCGAAGG	Bomo_Chr1	118585	118608
Bm_sgRNA_33019	CCGAGCATGCGGGGGTCCTT	KWMTBOMO00005_exon_1	CCGAGCATGCGGGGGTCCTTCGG	Bomo_Chr1	118569	118592
Bm_sgRNA_38341	CGGGGGTCCTTCGGCACCCG	KWMTBOMO00005_exon_1	CGGGGGTCCTTCGGCACCCGTGG	Bomo_Chr1	118578	118601
Bm_sgRNA_44627	CTTGCTGCGCGCCGAACGCA	KWMTBOMO00005_exon_1	CTTGCTGCGCGCCGAACGCATGG	Bomo_Chr1	118601	118624
Bm_sgRNA_48952	GAGAGTAGTAGCTCGTGTAG	KWMTBOMO00005_exon_1	GAGAGTAGTAGCTCGTGTAGTGG	Bomo_Chr1	118701	118724
Bm_sgRNA_56403	GCTGGCGGTGCCGCGTTCTT	KWMTBOMO00005_exon_1	GCTGGCGGTGCCGCGTTCTTTGG	Bomo_Chr1	118631	118654
Bm_sgRNA_66807	GTTCGGCGCGCAGCAAGCCA	KWMTBOMO00005_exon_1	GTTCGGCGCGCAGCAAGCCACGG	Bomo_Chr1	118595	118618
Bm_sgRNA_71014	TAGCTCGTGTAGTGGGAAGC	KWMTBOMO00005_exon_1	TAGCTCGTGTAGTGGGAAGCAGG	Bomo_Chr1	118693	118716
Bm_sgRNA_72649	TATGTTGGAGCCGAGCATGC	KWMTBOMO00005_exon_1	TATGTTGGAGCCGAGCATGCGGG	Bomo_Chr1	118559	118582
Bm_sgRNA_83098	TGGGAAGCAGGAGTGTCAGA	KWMTBOMO00005_exon_1	TGGGAAGCAGGAGTGTCAGAGGG	Bomo_Chr1	118681	118704
Bm_sgRNA_02474	AAATTTATAAAGTTTTTCTT	KWMTBOMO00006_exon_1	AAATTTATAAAGTTTTTCTTTGG	Bomo_Chr1	141952	141975
Bm_sgRNA_08291	ACACTTTTGAAGGAAACATC	KWMTBOMO00006_exon_2	ACACTTTTGAAGGAAACATCAGG	Bomo_Chr1	141748	141771
Bm_sgRNA_20539	ATCCCTTAACATCTCATTCA	KWMTBOMO00006_exon_2	ATCCCTTAACATCTCATTCACGG	Bomo_Chr1	141805	141828
Bm_sgRNA_30634	CATTGACTACAACTTAATGA	KWMTBOMO00006_exon_2	CATTGACTACAACTTAATGACGG	Bomo_Chr1	141771	141794
Bm_sgRNA_53617	GCCCGTGAATGAGATGTTAA	KWMTBOMO00006_exon_2	GCCCGTGAATGAGATGTTAAGGG	Bomo_Chr1	141807	141830
Bm_sgRNA_85795	TTAATGACGGACACTTTTGA	KWMTBOMO00006_exon_2	TTAATGACGGACACTTTTGAAGG	Bomo_Chr1	141758	141781
Bm_sgRNA_45135	CTTTGTAGCGATCAATAGGT	KWMTBOMO00006_promoter	CTTTGTAGCGATCAATAGGTAGG	Bomo_Chr1	142070	142093
Bm_sgRNA_68312	TAAAGCTGTCCTATTCAGTA	KWMTBOMO00006_promoter	TAAAGCTGTCCTATTCAGTACGG	Bomo_Chr1	142119	142142
Bm_sgRNA_78233	TCTGACTAATTTGACGAAGT	KWMTBOMO00006_promoter	TCTGACTAATTTGACGAAGTTGG	Bomo_Chr1	142036	142059
Bm_sgRNA_02096	AAATCGGTTGGAGGCACACA	KWMTBOMO00007_exon_1	AAATCGGTTGGAGGCACACATGG	Bomo_Chr1	201657	201680
Bm_sgRNA_14420	AGATTATGTGCCACTCGTAG	KWMTBOMO00007_exon_1	AGATTATGTGCCACTCGTAGCGG	Bomo_Chr1	201823	201846
Bm_sgRNA_22984	ATTACAACAACCGCTACGAG	KWMTBOMO00007_exon_1	ATTACAACAACCGCTACGAGTGG	Bomo_Chr1	201813	201836
Bm_sgRNA_49542	GAGGCACACATGGCGCGGAC	KWMTBOMO00007_exon_1	GAGGCACACATGGCGCGGACCGG	Bomo_Chr1	201667	201690
Bm_sgRNA_52077	GCACACATGGCGCGGACCGG	KWMTBOMO00007_exon_1	GCACACATGGCGCGGACCGGCGG	Bomo_Chr1	201670	201693
Bm_sgRNA_61313	GGTCCGCTGCTCCTCGTCGT	KWMTBOMO00007_exon_1	GGTCCGCTGCTCCTCGTCGTCGG	Bomo_Chr1	201723	201746
Bm_sgRNA_62140	GGTTGTTGTAGAGAGCCGGG	KWMTBOMO00007_exon_1	GGTTGTTGTAGAGAGCCGGGCGG	Bomo_Chr1	201779	201802
Bm_sgRNA_67371	GTTGTAGAGAGCCGGGCGGA	KWMTBOMO00007_exon_1	GTTGTAGAGAGCCGGGCGGAAGG	Bomo_Chr1	201775	201798
Bm_sgRNA_58068	GGAGCGCGACCGCATGCTGA	KWMTBOMO00007_exon_14	GGAGCGCGACCGCATGCTGAAGG	Bomo_Chr1	157636	157659
Bm_sgRNA_18824	ATACAACAATAATTCCGCAC	KWMTBOMO00007_exon_15	ATACAACAATAATTCCGCACAGG	Bomo_Chr1	156795	156818
Bm_sgRNA_20349	ATCATGGTCGCGATGCCAAT	KWMTBOMO00007_exon_15	ATCATGGTCGCGATGCCAATCGG	Bomo_Chr1	156818	156841
Bm_sgRNA_08878	ACATCAGCTGAGCGAGAGTG	KWMTBOMO00007_exon_16	ACATCAGCTGAGCGAGAGTGCGG	Bomo_Chr1	156581	156604
Bm_sgRNA_38445	CGGTCAACAGCAACCCCAGC	KWMTBOMO00007_exon_2	CGGTCAACAGCAACCCCAGCAGG	Bomo_Chr1	188640	188663
Bm_sgRNA_75589	TCCGAACTTGCACCACCATG	KWMTBOMO00007_exon_2	TCCGAACTTGCACCACCATGAGG	Bomo_Chr1	188607	188630
Bm_sgRNA_32957	CCGACCCGTCCCACTACAAG	KWMTBOMO00007_exon_3	CCGACCCGTCCCACTACAAGCGG	Bomo_Chr1	188342	188365
Bm_sgRNA_43937	CTTCACGCAGTACCCGCGCT	KWMTBOMO00007_exon_3	CTTCACGCAGTACCCGCGCTCGG	Bomo_Chr1	188398	188421
Bm_sgRNA_09548	ACCCCCAACGGGCACTTCAG	KWMTBOMO00008_exon_2	ACCCCCAACGGGCACTTCAGAGG	KWMTBOMO00008_exon_2	530	553
Bm_sgRNA_10936	ACGGGGGATGCGCGATATAT	KWMTBOMO00008_exon_2	ACGGGGGATGCGCGATATATCGG	KWMTBOMO00008_exon_2	1699	1722
Bm_sgRNA_17161	AGTATCCCAATACTCTCGGA	KWMTBOMO00008_exon_2	AGTATCCCAATACTCTCGGAAGG	KWMTBOMO00008_exon_2	1924	1947
Bm_sgRNA_30809	CATTTGACTCCATACAGAGG	KWMTBOMO00008_exon_2	CATTTGACTCCATACAGAGGAGG	KWMTBOMO00008_exon_2	2153	2176
Bm_sgRNA_31937	CCATACAGAGGAGGGCCGTT	KWMTBOMO00008_exon_2	CCATACAGAGGAGGGCCGTTCGG	KWMTBOMO00008_exon_2	2162	2185
Bm_sgRNA_40017	CTAACATCTCAGAGGAAAGG	KWMTBOMO00008_exon_2	CTAACATCTCAGAGGAAAGGCGG	KWMTBOMO00008_exon_2	650	673
Bm_sgRNA_42302	CTGAAGTGGAGAACTCTCTG	KWMTBOMO00008_exon_2	CTGAAGTGGAGAACTCTCTGGGG	KWMTBOMO00008_exon_2	1775	1798
Bm_sgRNA_49345	GAGCTCATTCCATAGCCGGA	KWMTBOMO00008_exon_2	GAGCTCATTCCATAGCCGGATGG	KWMTBOMO00008_exon_2	2426	2449
Bm_sgRNA_49874	GAGTCCTCAACAGAGCGAAG	KWMTBOMO00008_exon_2	GAGTCCTCAACAGAGCGAAGCGG	KWMTBOMO00008_exon_2	2024	2047
Bm_sgRNA_76872	TCGGCCATCAGAGTCTCTCT	KWMTBOMO00008_exon_2	TCGGCCATCAGAGTCTCTCTCGG	KWMTBOMO00008_exon_2	1718	1741
Bm_sgRNA_82081	TGCTGATCCTGACGTCTGTG	KWMTBOMO00008_exon_2	TGCTGATCCTGACGTCTGTGCGG	KWMTBOMO00008_exon_2	459	482
Bm_sgRNA_83193	TGGGCGGTCTTCCATGAAGA	KWMTBOMO00008_exon_2	TGGGCGGTCTTCCATGAAGACGG	KWMTBOMO00008_exon_2	1150	1173
Bm_sgRNA_91838	TTTGGATGGGCGGAGCATCA	KWMTBOMO00008_exon_2	TTTGGATGGGCGGAGCATCACGG	KWMTBOMO00008_exon_2	1533	1556
Bm_sgRNA_27766	CACTGAAGTTCATACGAAGC	KWMTBOMO00009_exon_2	CACTGAAGTTCATACGAAGCGGG	Bomo_Chr1	277086	277109
Bm_sgRNA_52331	GCACTGAAGTTCATACGAAG	KWMTBOMO00009_exon_2	GCACTGAAGTTCATACGAAGCGG	Bomo_Chr1	277085	277108
Bm_sgRNA_33198	CCGCATTTTCCAGTCGCGCT	KWMTBOMO00009_exon_3	CCGCATTTTCCAGTCGCGCTTGG	Bomo_Chr1	276769	276792
Bm_sgRNA_41115	CTCAGTCTACGCAGTCGCAG	KWMTBOMO00009_exon_3	CTCAGTCTACGCAGTCGCAGCGG	Bomo_Chr1	276746	276769
Bm_sgRNA_60293	GGGCCACCTCCAAGCGCGAC	KWMTBOMO00009_exon_3	GGGCCACCTCCAAGCGCGACTGG	Bomo_Chr1	276778	276801
Bm_sgRNA_91052	TTTCCAGTCGCGCTTGGAGG	KWMTBOMO00009_exon_3	TTTCCAGTCGCGCTTGGAGGTGG	Bomo_Chr1	276775	276798
Bm_sgRNA_00132	AAAAAGAAAAAGGGCTATAT	KWMTBOMO00010_exon_1	AAAAAGAAAAAGGGCTATATCGG	KWMTBOMO00010_exon_1	37	60
Bm_sgRNA_09623	ACCCGTGTCCCAGATATCGA	KWMTBOMO00010_exon_1	ACCCGTGTCCCAGATATCGAGGG	KWMTBOMO00010_exon_1	608	631
Bm_sgRNA_16695	AGGTCCCACAGCAGTGATGC	KWMTBOMO00010_exon_1	AGGTCCCACAGCAGTGATGCAGG	KWMTBOMO00010_exon_1	389	412
Bm_sgRNA_40017	CTAACATCTCAGAGGAAAGG	KWMTBOMO00010_exon_1	CTAACATCTCAGAGGAAAGGCGG	KWMTBOMO00010_exon_1	1062	1085
Bm_sgRNA_63065	GTAGGCCAAGGCGAAATCGT	KWMTBOMO00010_exon_1	GTAGGCCAAGGCGAAATCGTAGG	KWMTBOMO00010_exon_1	558	581
Bm_sgRNA_79157	TGAAAATAAGAAAAAGAAAA	KWMTBOMO00010_exon_1	TGAAAATAAGAAAAAGAAAAAGG	KWMTBOMO00010_exon_1	27	50
Bm_sgRNA_82081	TGCTGATCCTGACGTCTGTG	KWMTBOMO00010_exon_1	TGCTGATCCTGACGTCTGTGCGG	KWMTBOMO00010_exon_1	871	894
Bm_sgRNA_10936	ACGGGGGATGCGCGATATAT	KWMTBOMO00010_exon_2	ACGGGGGATGCGCGATATATCGG	Bomo_Chr1	342856	342879
Bm_sgRNA_30809	CATTTGACTCCATACAGAGG	KWMTBOMO00010_exon_2	CATTTGACTCCATACAGAGGAGG	Bomo_Chr1	343310	343333
Bm_sgRNA_42302	CTGAAGTGGAGAACTCTCTG	KWMTBOMO00010_exon_2	CTGAAGTGGAGAACTCTCTGGGG	Bomo_Chr1	342932	342955
Bm_sgRNA_49345	GAGCTCATTCCATAGCCGGA	KWMTBOMO00010_exon_2	GAGCTCATTCCATAGCCGGATGG	Bomo_Chr1	343583	343606
Bm_sgRNA_49874	GAGTCCTCAACAGAGCGAAG	KWMTBOMO00010_exon_2	GAGTCCTCAACAGAGCGAAGCGG	Bomo_Chr1	343181	343204
Bm_sgRNA_70509	TACTGTTCCCATCTCTGGGC	KWMTBOMO00010_exon_2	TACTGTTCCCATCTCTGGGCCGG	Bomo_Chr1	343264	343287
Bm_sgRNA_83193	TGGGCGGTCTTCCATGAAGA	KWMTBOMO00010_exon_2	TGGGCGGTCTTCCATGAAGACGG	Bomo_Chr1	342307	342330
Bm_sgRNA_86367	TTAGCGCAGGCGTCAGCTCA	KWMTBOMO00010_exon_2	TTAGCGCAGGCGTCAGCTCAGGG	Bomo_Chr1	342246	342269
Bm_sgRNA_44080	CTTCCCCAGCTAATGAAACC	KWMTBOMO00011_exon_2	CTTCCCCAGCTAATGAAACCAGG	Bomo_Chr1	368237	368260
Bm_sgRNA_50855	GATGACCTGGTTTCATTAGC	KWMTBOMO00011_exon_2	GATGACCTGGTTTCATTAGCTGG	Bomo_Chr1	368232	368255
Bm_sgRNA_51718	GCAAAGAGTGATGTCGCTAC	KWMTBOMO00011_exon_2	GCAAAGAGTGATGTCGCTACAGG	Bomo_Chr1	368176	368199
Bm_sgRNA_79875	TGACCTGGTTTCATTAGCTG	KWMTBOMO00011_exon_2	TGACCTGGTTTCATTAGCTGGGG	Bomo_Chr1	368234	368257
Bm_sgRNA_91016	TTTCATTAGCTGGGGAAGAA	KWMTBOMO00011_exon_2	TTTCATTAGCTGGGGAAGAATGG	Bomo_Chr1	368242	368265
Bm_sgRNA_29895	CATCCTTATCTAAGGCTTCC	KWMTBOMO00012_exon_1	CATCCTTATCTAAGGCTTCCAGG	Bomo_Chr1	400111	400134
Bm_sgRNA_01618	AAAGGAGTATCCTCACACCT	KWMTBOMO00012_exon_2	AAAGGAGTATCCTCACACCTAGG	Bomo_Chr1	399157	399180
Bm_sgRNA_38313	CGGGGAGCATCCTGAGCCCG	KWMTBOMO00013_exon_1	CGGGGAGCATCCTGAGCCCGGGG	Bomo_Chr1	402921	402944
Bm_sgRNA_42394	CTGAGCCCGGGGTCCATTCA	KWMTBOMO00013_exon_1	CTGAGCCCGGGGTCCATTCACGG	Bomo_Chr1	402932	402955
Bm_sgRNA_42548	CTGCAATCGGGTTTCCCAGG	KWMTBOMO00013_exon_1	CTGCAATCGGGTTTCCCAGGAGG	Bomo_Chr1	403014	403037
Bm_sgRNA_61317	GGTCCGGGTCTCGCGACTGG	KWMTBOMO00013_exon_1	GGTCCGGGTCTCGCGACTGGCGG	Bomo_Chr1	402954	402977
Bm_sgRNA_77382	TCGTTTCGGACGGGCGAATG	KWMTBOMO00013_exon_1	TCGTTTCGGACGGGCGAATGCGG	Bomo_Chr1	402895	402918
Bm_sgRNA_91071	TTTCCCAGGAGGTCACGTGC	KWMTBOMO00013_exon_1	TTTCCCAGGAGGTCACGTGCCGG	Bomo_Chr1	403003	403026
Bm_sgRNA_01100	AAACGGAACAAGACGACCCC	KWMTBOMO00013_promoter	AAACGGAACAAGACGACCCCCGG	Bomo_Chr1	403114	403137
Bm_sgRNA_66789	GTTCGCGGCTCCAATCAACC	KWMTBOMO00013_promoter	GTTCGCGGCTCCAATCAACCGGG	Bomo_Chr1	403132	403155
Bm_sgRNA_76680	TCGCGGCTCCAATCAACCGG	KWMTBOMO00013_promoter	TCGCGGCTCCAATCAACCGGGGG	Bomo_Chr1	403130	403153
Bm_sgRNA_05386	AAGTTGTGGGTAATAATTTA	KWMTBOMO00014_exon_1	AAGTTGTGGGTAATAATTTATGG	KWMTBOMO00014_exon_1	105	128
Bm_sgRNA_07415	AATTTTCCACGTTAAGTTGT	KWMTBOMO00014_exon_1	AATTTTCCACGTTAAGTTGTGGG	KWMTBOMO00014_exon_1	118	141
Bm_sgRNA_17985	AGTTATTGTCTCTTAAGCTG	KWMTBOMO00014_exon_1	AGTTATTGTCTCTTAAGCTGAGG	KWMTBOMO00014_exon_1	390	413
Bm_sgRNA_69457	TAATTTATGGCGTTTGTTAC	KWMTBOMO00014_exon_1	TAATTTATGGCGTTTGTTACTGG	KWMTBOMO00014_exon_1	92	115
Bm_sgRNA_69489	TAATTTTCCACGTTAAGTTG	KWMTBOMO00014_exon_1	TAATTTTCCACGTTAAGTTGTGG	KWMTBOMO00014_exon_1	119	142
Bm_sgRNA_86844	TTATTACCCACAACTTAACG	KWMTBOMO00014_exon_1	TTATTACCCACAACTTAACGTGG	KWMTBOMO00014_exon_1	112	135
Bm_sgRNA_28385	CAGCATTTGAGGATCCTGCG	KWMTBOMO00014_promoter	CAGCATTTGAGGATCCTGCGTGG	Bomo_Chr1	404450	404473
Bm_sgRNA_40594	CTAGGCACTTTGGGTACTCT	KWMTBOMO00014_promoter	CTAGGCACTTTGGGTACTCTGGG	Bomo_Chr1	404854	404877
Bm_sgRNA_77774	TCTCACCTTGCGAAATTTCT	KWMTBOMO00014_promoter	TCTCACCTTGCGAAATTTCTAGG	Bomo_Chr1	404872	404895
Bm_sgRNA_89987	TTGTATCAGGTGACAAATCC	KWMTBOMO00014_promoter	TTGTATCAGGTGACAAATCCTGG	Bomo_Chr1	404418	404441
Bm_sgRNA_58570	GGATTACTTGATGATGTGCA	KWMTBOMO00015_exon_2	GGATTACTTGATGATGTGCATGG	Bomo_Chr1	422922	422945
Bm_sgRNA_73569	TCAAGTAATCCAGCGAATAA	KWMTBOMO00015_exon_2	TCAAGTAATCCAGCGAATAATGG	Bomo_Chr1	422910	422933
Bm_sgRNA_78760	TCTTCCTTTCCATTATTCGC	KWMTBOMO00015_exon_2	TCTTCCTTTCCATTATTCGCTGG	Bomo_Chr1	422901	422924
Bm_sgRNA_11506	ACTATGGAGGCTGATACTAC	KWMTBOMO00015_exon_3	ACTATGGAGGCTGATACTACAGG	Bomo_Chr1	422473	422496
Bm_sgRNA_20904	ATCGGATTCAGAAGTTTCTA	KWMTBOMO00015_exon_3	ATCGGATTCAGAAGTTTCTATGG	Bomo_Chr1	422187	422210
Bm_sgRNA_41162	CTCATCATTTCGGGGACTGT	KWMTBOMO00015_exon_3	CTCATCATTTCGGGGACTGTCGG	Bomo_Chr1	422343	422366
Bm_sgRNA_06982	AATTATAAACTGCTTTAATC	KWMTBOMO00016_exon_1	AATTATAAACTGCTTTAATCGGG	Bomo_Chr1	429302	429325
Bm_sgRNA_16272	AGGCCTCGGCGACTGGTATT	KWMTBOMO00016_exon_1	AGGCCTCGGCGACTGGTATTTGG	Bomo_Chr1	431937	431960
Bm_sgRNA_28946	CAGGTCGTACACTTTACGAT	KWMTBOMO00016_exon_1	CAGGTCGTACACTTTACGATAGG	Bomo_Chr1	430669	430692
Bm_sgRNA_29593	CATATATGGGTGGGAAGACA	KWMTBOMO00016_exon_1	CATATATGGGTGGGAAGACAGGG	Bomo_Chr1	430143	430166
Bm_sgRNA_43004	CTGGAGTTGGAAACCCGAAC	KWMTBOMO00016_exon_1	CTGGAGTTGGAAACCCGAACAGG	Bomo_Chr1	432438	432461
Bm_sgRNA_48088	GACGACACTAGCCGAGGGGA	KWMTBOMO00016_exon_1	GACGACACTAGCCGAGGGGAAGG	Bomo_Chr1	429382	429405
Bm_sgRNA_49106	GAGCACTAGACCCTTCCCCT	KWMTBOMO00016_exon_1	GAGCACTAGACCCTTCCCCTCGG	Bomo_Chr1	429393	429416
Bm_sgRNA_61034	GGTAGACTGTTTGCTGTACG	KWMTBOMO00016_exon_1	GGTAGACTGTTTGCTGTACGGGG	Bomo_Chr1	430416	430439
Bm_sgRNA_63029	GTAGCTCGGTTTCGGACTTA	KWMTBOMO00016_exon_1	GTAGCTCGGTTTCGGACTTAGGG	Bomo_Chr1	432522	432545
Bm_sgRNA_63590	GTCACATACTGAGCGACAAT	KWMTBOMO00016_exon_1	GTCACATACTGAGCGACAATTGG	Bomo_Chr1	431673	431696
Bm_sgRNA_77627	TCTAGTGCTCGTCTAGTAAA	KWMTBOMO00016_exon_1	TCTAGTGCTCGTCTAGTAAAAGG	Bomo_Chr1	429406	429429
Bm_sgRNA_29436	CATACACTTCTCGCGGAACG	KWMTBOMO00016_promoter	CATACACTTCTCGCGGAACGCGG	Bomo_Chr1	429194	429217
Bm_sgRNA_28753	CAGGAGACGGGCGACCTAAA	KWMTBOMO00017_exon_2	CAGGAGACGGGCGACCTAAACGG	Bomo_Chr1	452957	452980
Bm_sgRNA_48008	GACCTAAACGGCGCCAAGGC	KWMTBOMO00017_exon_2	GACCTAAACGGCGCCAAGGCGGG	Bomo_Chr1	452945	452968
Bm_sgRNA_59094	GGCCCGCCTTGGCGCCGTTT	KWMTBOMO00017_exon_2	GGCCCGCCTTGGCGCCGTTTAGG	Bomo_Chr1	452943	452966
Bm_sgRNA_64386	GTCGGTGTCTGGGCCCGCCT	KWMTBOMO00017_exon_2	GTCGGTGTCTGGGCCCGCCTTGG	Bomo_Chr1	452932	452955
Bm_sgRNA_71022	TAGCTGAATGAGTACTCCGG	KWMTBOMO00017_exon_2	TAGCTGAATGAGTACTCCGGAGG	Bomo_Chr1	452893	452916
Bm_sgRNA_88366	TTCTAGCTGAATGAGTACTC	KWMTBOMO00017_exon_2	TTCTAGCTGAATGAGTACTCCGG	Bomo_Chr1	452890	452913
Bm_sgRNA_13618	AGACGTTCGGTTGGGATTTC	KWMTBOMO00018_exon_2	AGACGTTCGGTTGGGATTTCAGG	Bomo_Chr1	494439	494462
Bm_sgRNA_16346	AGGCGGTGTTTGGATCTGAT	KWMTBOMO00018_exon_2	AGGCGGTGTTTGGATCTGATCGG	Bomo_Chr1	494520	494543
Bm_sgRNA_20184	ATCAGATCCAAACACCGCCT	KWMTBOMO00018_exon_2	ATCAGATCCAAACACCGCCTTGG	Bomo_Chr1	494517	494540
Bm_sgRNA_22839	ATGTTTCCTGTCGTAGTCCA	KWMTBOMO00018_exon_2	ATGTTTCCTGTCGTAGTCCAAGG	Bomo_Chr1	494500	494523
Bm_sgRNA_33111	CCGATGCGGAATGTGAGTCT	KWMTBOMO00018_exon_2	CCGATGCGGAATGTGAGTCTCGG	Bomo_Chr1	494392	494415
Bm_sgRNA_77113	TCGTAGTCCAAGGCGGTGTT	KWMTBOMO00018_exon_2	TCGTAGTCCAAGGCGGTGTTTGG	Bomo_Chr1	494510	494533
Bm_sgRNA_11639	ACTCCCGAAGACAGGGAGCA	KWMTBOMO00019_exon_5	ACTCCCGAAGACAGGGAGCACGG	Bomo_Chr1	541825	541848
Bm_sgRNA_74896	TCATTCCAACTCCCGAAGAC	KWMTBOMO00019_exon_5	TCATTCCAACTCCCGAAGACAGG	Bomo_Chr1	541817	541840
Bm_sgRNA_24081	ATTGTAGCCCATGGTGTACC	KWMTBOMO00019_exon_6	ATTGTAGCCCATGGTGTACCCGG	Bomo_Chr1	542591	542614
Bm_sgRNA_27002	CACATGCCCGGGTACACCAT	KWMTBOMO00019_exon_6	CACATGCCCGGGTACACCATGGG	Bomo_Chr1	542584	542607
Bm_sgRNA_89966	TTGTAGCCCATGGTGTACCC	KWMTBOMO00019_exon_6	TTGTAGCCCATGGTGTACCCGGG	Bomo_Chr1	542590	542613
Bm_sgRNA_05470	AATAAATACATTTCGATTCA	KWMTBOMO00020_exon_1	AATAAATACATTTCGATTCAAGG	Bomo_Chr1	550718	550741
Bm_sgRNA_18913	ATACATTTCGATTCAAGGAG	KWMTBOMO00020_exon_1	ATACATTTCGATTCAAGGAGAGG	Bomo_Chr1	550713	550736
Bm_sgRNA_26472	CAATGAGAAGAAGTTCAGCA	KWMTBOMO00020_exon_2	CAATGAGAAGAAGTTCAGCAAGG	Bomo_Chr1	549884	549907
Bm_sgRNA_29318	CAGTTTCATGGGCTGGTTCT	KWMTBOMO00020_exon_2	CAGTTTCATGGGCTGGTTCTGGG	Bomo_Chr1	549907	549930
Bm_sgRNA_74539	TCAGTTTCATGGGCTGGTTC	KWMTBOMO00020_exon_2	TCAGTTTCATGGGCTGGTTCTGG	Bomo_Chr1	549908	549931
Bm_sgRNA_17960	AGTTAGAATCTATCAGGGTG	KWMTBOMO00020_exon_3	AGTTAGAATCTATCAGGGTGTGG	Bomo_Chr1	549392	549415
Bm_sgRNA_29054	CAGTATCTTTTCACTATTAA	KWMTBOMO00020_promoter	CAGTATCTTTTCACTATTAAAGG	Bomo_Chr1	550900	550923
Bm_sgRNA_67855	GTTTGTTTCGTCCATTAAAC	KWMTBOMO00020_promoter	GTTTGTTTCGTCCATTAAACAGG	Bomo_Chr1	550857	550880
Bm_sgRNA_80381	TGAGTAAATATTCGATTCGA	KWMTBOMO00020_promoter	TGAGTAAATATTCGATTCGAAGG	Bomo_Chr1	551001	551024
Bm_sgRNA_60526	GGGGATTTGACGTCTTTCTT	KWMTBOMO00021_exon_1	GGGGATTTGACGTCTTTCTTTGG	Bomo_Chr1	552609	552632
Bm_sgRNA_02968	AACCAAGATACCACCAGCTA	KWMTBOMO00021_exon_2	AACCAAGATACCACCAGCTAAGG	Bomo_Chr1	553278	553301
Bm_sgRNA_44418	CTTCTTGTGTCAGCACCCAC	KWMTBOMO00021_exon_2	CTTCTTGTGTCAGCACCCACTGG	Bomo_Chr1	552892	552915
Bm_sgRNA_54280	GCGAACACATGATCCTTAGC	KWMTBOMO00021_exon_2	GCGAACACATGATCCTTAGCTGG	Bomo_Chr1	553291	553314
Bm_sgRNA_64231	GTCGCCACCATTCTTCCCAG	KWMTBOMO00021_exon_2	GTCGCCACCATTCTTCCCAGAGG	Bomo_Chr1	552837	552860
Bm_sgRNA_79389	TGAAGAATATCGTAAAGACG	KWMTBOMO00021_exon_2	TGAAGAATATCGTAAAGACGAGG	Bomo_Chr1	553042	553065
Bm_sgRNA_82371	TGGAAGGAATTCTATCCTCT	KWMTBOMO00021_exon_2	TGGAAGGAATTCTATCCTCTGGG	Bomo_Chr1	552822	552845
Bm_sgRNA_04955	AAGGGTCTGCTGAACGGTTT	KWMTBOMO00022_exon_1	AAGGGTCTGCTGAACGGTTTTGG	Bomo_Chr1	567292	567315
Bm_sgRNA_08479	ACAGCCTCAGGACAGTCCAT	KWMTBOMO00022_exon_1	ACAGCCTCAGGACAGTCCATAGG	Bomo_Chr1	567152	567175
Bm_sgRNA_20586	ATCCGGGGCAGCGGTCCTTA	KWMTBOMO00022_exon_1	ATCCGGGGCAGCGGTCCTTACGG	Bomo_Chr1	567533	567556
Bm_sgRNA_20596	ATCCGTAAGGACCGCTGCCC	KWMTBOMO00022_exon_1	ATCCGTAAGGACCGCTGCCCCGG	Bomo_Chr1	567535	567558
Bm_sgRNA_28313	CAGCAGAAGATACTCTAGGC	KWMTBOMO00022_exon_1	CAGCAGAAGATACTCTAGGCTGG	Bomo_Chr1	564618	564641
Bm_sgRNA_78433	TCTGGAGTATCGCCTGCTAA	KWMTBOMO00022_exon_1	TCTGGAGTATCGCCTGCTAAAGG	Bomo_Chr1	567311	567334
Bm_sgRNA_11605	ACTCATCCGAGTGTAGTAGT	KWMTBOMO00022_promoter	ACTCATCCGAGTGTAGTAGTGGG	Bomo_Chr1	564394	564417
Bm_sgRNA_27717	CACTCATCCGAGTGTAGTAG	KWMTBOMO00022_promoter	CACTCATCCGAGTGTAGTAGTGG	Bomo_Chr1	564393	564416
Bm_sgRNA_49949	GAGTGGCCCACTACTACACT	KWMTBOMO00022_promoter	GAGTGGCCCACTACTACACTCGG	Bomo_Chr1	564400	564423
Bm_sgRNA_16338	AGGCGGGTACTGGACTAGTT	KWMTBOMO00023_exon_1	AGGCGGGTACTGGACTAGTTTGG	Bomo_Chr1	605965	605988
Bm_sgRNA_21478	ATGAACTAATTTAATATCAC	KWMTBOMO00023_exon_1	ATGAACTAATTTAATATCACTGG	Bomo_Chr1	606222	606245
Bm_sgRNA_30475	CATGTTTGTCCCAGCAGCAT	KWMTBOMO00023_exon_1	CATGTTTGTCCCAGCAGCATTGG	Bomo_Chr1	605565	605588
Bm_sgRNA_51934	GCAAGTGTTCTTGCCATGGT	KWMTBOMO00023_exon_1	GCAAGTGTTCTTGCCATGGTAGG	Bomo_Chr1	605753	605776
Bm_sgRNA_59052	GGCCAGTTGCCATGTTTCCT	KWMTBOMO00023_exon_1	GGCCAGTTGCCATGTTTCCTAGG	Bomo_Chr1	605895	605918
Bm_sgRNA_61832	GGTGTAACCAGTAACAGAGA	KWMTBOMO00023_exon_1	GGTGTAACCAGTAACAGAGAAGG	Bomo_Chr1	605698	605721
Bm_sgRNA_71422	TAGTTCATCAGTTAATTACG	KWMTBOMO00023_exon_1	TAGTTCATCAGTTAATTACGTGG	Bomo_Chr1	606207	606230
Bm_sgRNA_10943	ACGGGTAGCGGATAGTAGGG	KWMTBOMO00024_exon_1	ACGGGTAGCGGATAGTAGGGCGG	Bomo_Chr1	607861	607884
Bm_sgRNA_11873	ACTGAAAGTGTTACGGGTAG	KWMTBOMO00024_exon_1	ACTGAAAGTGTTACGGGTAGCGG	Bomo_Chr1	607849	607872
Bm_sgRNA_27981	CAGAACAGTTCTCGTTGCGG	KWMTBOMO00024_exon_1	CAGAACAGTTCTCGTTGCGGTGG	Bomo_Chr1	607935	607958
Bm_sgRNA_56335	GCTGGAAGGCGAGGACCTGG	KWMTBOMO00024_exon_1	GCTGGAAGGCGAGGACCTGGTGG	Bomo_Chr1	607999	608022
Bm_sgRNA_56910	GCTTGTGTGCATGGACATAC	KWMTBOMO00024_exon_1	GCTTGTGTGCATGGACATACTGG	Bomo_Chr1	608044	608067
Bm_sgRNA_60381	GGGCGGAGGTGTATTTTCGG	KWMTBOMO00024_exon_1	GGGCGGAGGTGTATTTTCGGAGG	Bomo_Chr1	607878	607901
Bm_sgRNA_61732	GGTGGACGTGACGCTTGCGG	KWMTBOMO00024_exon_1	GGTGGACGTGACGCTTGCGGCGG	Bomo_Chr1	608017	608040
Bm_sgRNA_74478	TCAGTCTTTTCACGCTTTGC	KWMTBOMO00024_exon_1	TCAGTCTTTTCACGCTTTGCTGG	Bomo_Chr1	607981	608004
Bm_sgRNA_81028	TGCACACAAGCTTATCCTCT	KWMTBOMO00024_exon_1	TGCACACAAGCTTATCCTCTCGG	Bomo_Chr1	608056	608079
Bm_sgRNA_02482	AAATTTCCACAACACGCGGA	KWMTBOMO00025_exon_1	AAATTTCCACAACACGCGGAAGG	Bomo_Chr1	636725	636748
Bm_sgRNA_09467	ACCATTACACAGTTGGCGAC	KWMTBOMO00025_exon_1	ACCATTACACAGTTGGCGACTGG	Bomo_Chr1	636307	636330
Bm_sgRNA_18637	ATAAGGATACGAGCCTTTGG	KWMTBOMO00025_exon_1	ATAAGGATACGAGCCTTTGGGGG	Bomo_Chr1	636111	636134
Bm_sgRNA_19458	ATAGTCCGGGAGACCTTCCG	KWMTBOMO00025_exon_1	ATAGTCCGGGAGACCTTCCGTGG	Bomo_Chr1	635772	635795
Bm_sgRNA_34964	CCTTTGGGGGGTGCAATTCA	KWMTBOMO00025_exon_1	CCTTTGGGGGGTGCAATTCATGG	Bomo_Chr1	636098	636121
Bm_sgRNA_37662	CGGACCGTTCTCGTTGCTGT	KWMTBOMO00025_exon_1	CGGACCGTTCTCGTTGCTGTTGG	Bomo_Chr1	636460	636483
Bm_sgRNA_43945	CTTCACTACTAGAGAAATGG	KWMTBOMO00025_exon_1	CTTCACTACTAGAGAAATGGTGG	Bomo_Chr1	636776	636799
Bm_sgRNA_47509	GACAATTGCCACTGAAGAAA	KWMTBOMO00025_exon_1	GACAATTGCCACTGAAGAAAGGG	Bomo_Chr1	636971	636994
Bm_sgRNA_53509	GCCCAGTCGTCACTCCTGTA	KWMTBOMO00025_exon_1	GCCCAGTCGTCACTCCTGTACGG	Bomo_Chr1	637074	637097
Bm_sgRNA_79711	TGACAAGTGCCCGGCAGTAG	KWMTBOMO00025_exon_1	TGACAAGTGCCCGGCAGTAGCGG	Bomo_Chr1	635804	635827
Bm_sgRNA_86068	TTACGACCTTCCGCGTGTTG	KWMTBOMO00025_exon_1	TTACGACCTTCCGCGTGTTGTGG	Bomo_Chr1	636731	636754
Bm_sgRNA_51044	GATGCTTTGTATTTGCAAAC	KWMTBOMO00025_promoter	GATGCTTTGTATTTGCAAACTGG	Bomo_Chr1	637261	637284
Bm_sgRNA_06363	AATCTTCATGGCCATATCCC	KWMTBOMO00026_exon_1	AATCTTCATGGCCATATCCCGGG	Bomo_Chr1	642267	642290
Bm_sgRNA_15999	AGGAGACTGATCTTGGTACC	KWMTBOMO00026_exon_1	AGGAGACTGATCTTGGTACCAGG	Bomo_Chr1	641530	641553
Bm_sgRNA_29392	CATAAGCCGATATCGCCGTA	KWMTBOMO00026_exon_1	CATAAGCCGATATCGCCGTATGG	Bomo_Chr1	642424	642447
Bm_sgRNA_54168	GCCTGTGTGGGGCCCACGGA	KWMTBOMO00026_exon_1	GCCTGTGTGGGGCCCACGGAGGG	Bomo_Chr1	642754	642777
Bm_sgRNA_64574	GTCTCCTACCGAATGGAGTG	KWMTBOMO00026_exon_1	GTCTCCTACCGAATGGAGTGCGG	Bomo_Chr1	641546	641569
Bm_sgRNA_67981	GTTTTTATCCATCATATACA	KWMTBOMO00026_promoter	GTTTTTATCCATCATATACAAGG	Bomo_Chr1	641252	641275
Bm_sgRNA_69064	TAAGTTTACCTTGTATATGA	KWMTBOMO00026_promoter	TAAGTTTACCTTGTATATGATGG	Bomo_Chr1	641260	641283
Bm_sgRNA_72744	TATTATATCTAAAAAGTTTG	KWMTBOMO00026_promoter	TATTATATCTAAAAAGTTTGAGG	Bomo_Chr1	641304	641327
Bm_sgRNA_13571	AGACGCCGTCCAGCTGACTC	KWMTBOMO00027_exon_2	AGACGCCGTCCAGCTGACTCTGG	Bomo_Chr1	701746	701769
Bm_sgRNA_26440	CAATCTGCTCCAGAGTCAGC	KWMTBOMO00027_exon_2	CAATCTGCTCCAGAGTCAGCTGG	Bomo_Chr1	701737	701760
Bm_sgRNA_83438	TGGTCGGCGTTCGTGCCGTG	KWMTBOMO00027_exon_2	TGGTCGGCGTTCGTGCCGTGCGG	Bomo_Chr1	701781	701804
Bm_sgRNA_20912	ATCGGCATTGTGTTGGATAT	KWMTBOMO00027_promoter	ATCGGCATTGTGTTGGATATTGG	Bomo_Chr1	702784	702807
Bm_sgRNA_20912	ATCGGCATTGTGTTGGATAT	KWMTBOMO00028_exon_1	ATCGGCATTGTGTTGGATATTGG	Bomo_Chr1	702784	702807
Bm_sgRNA_35634	CGACGCTATCGGCATTGTGT	KWMTBOMO00028_exon_1	CGACGCTATCGGCATTGTGTTGG	Bomo_Chr1	702777	702800
Bm_sgRNA_08748	ACAGTTCTGAATATGGACAC	KWMTBOMO00029_exon_1	ACAGTTCTGAATATGGACACAGG	Bomo_Chr1	714675	714698
Bm_sgRNA_11495	ACTATCTACACGGGAGCTAT	KWMTBOMO00029_exon_1	ACTATCTACACGGGAGCTATGGG	Bomo_Chr1	714712	714735
Bm_sgRNA_19349	ATAGCTCCCGTGTAGATAGT	KWMTBOMO00029_exon_1	ATAGCTCCCGTGTAGATAGTCGG	Bomo_Chr1	714709	714732
Bm_sgRNA_32113	CCATTATCTATTACGACTGC	KWMTBOMO00029_exon_1	CCATTATCTATTACGACTGCTGG	Bomo_Chr1	714612	714635
Bm_sgRNA_72792	TATTCAGAACTGTCGTTGGA	KWMTBOMO00029_exon_1	TATTCAGAACTGTCGTTGGAAGG	Bomo_Chr1	714685	714708
Bm_sgRNA_75258	TCCATATTCAGAACTGTCGT	KWMTBOMO00029_exon_1	TCCATATTCAGAACTGTCGTTGG	Bomo_Chr1	714681	714704
Bm_sgRNA_42254	CTGAACAAGCCAGTGGAGAA	KWMTBOMO00029_exon_2	CTGAACAAGCCAGTGGAGAAAGG	Bomo_Chr1	715206	715229
Bm_sgRNA_60160	GGGATAACATGGAGCGCATC	KWMTBOMO00029_exon_2	GGGATAACATGGAGCGCATCTGG	Bomo_Chr1	715243	715266
Bm_sgRNA_67875	GTTTTAGCCGTCTACGGCTC	KWMTBOMO00029_exon_3	GTTTTAGCCGTCTACGGCTCTGG	Bomo_Chr1	717856	717879
Bm_sgRNA_01422	AAAGATAAAGTCAATCGTTT	KWMTBOMO00029_promoter	AAAGATAAAGTCAATCGTTTAGG	Bomo_Chr1	714467	714490
Bm_sgRNA_05795	AATATAAAAAGTAATTAAAA	KWMTBOMO00029_promoter	AATATAAAAAGTAATTAAAAAGG	Bomo_Chr1	714412	714435
Bm_sgRNA_69379	TAATTAAAAAGGTTTTGTTA	KWMTBOMO00029_promoter	TAATTAAAAAGGTTTTGTTATGG	Bomo_Chr1	714423	714446
Bm_sgRNA_33354	CCGCTTCCTACGATCGCGAA	KWMTBOMO00030_exon_2	CCGCTTCCTACGATCGCGAACGG	Bomo_Chr1	730811	730834
Bm_sgRNA_47155	GAATCGTTGCGACAGACGTT	KWMTBOMO00030_exon_2	GAATCGTTGCGACAGACGTTTGG	Bomo_Chr1	730873	730896
Bm_sgRNA_57991	GGAGATTGCGAAGCAAATCC	KWMTBOMO00030_exon_2	GGAGATTGCGAAGCAAATCCTGG	Bomo_Chr1	730786	730809
Bm_sgRNA_87747	TTCCTACGATCGCGAACGGC	KWMTBOMO00030_exon_2	TTCCTACGATCGCGAACGGCTGG	Bomo_Chr1	730807	730830
Bm_sgRNA_04550	AAGCGCGAGAGTCGGCGACG	KWMTBOMO00031_exon_1	AAGCGCGAGAGTCGGCGACGCGG	Bomo_Chr1	883537	883560
Bm_sgRNA_32320	CCCAGGACGAAGACTGGGCT	KWMTBOMO00031_exon_1	CCCAGGACGAAGACTGGGCTAGG	Bomo_Chr1	883717	883740
Bm_sgRNA_48281	GACGGCGCCTCCATCGCTGC	KWMTBOMO00031_exon_1	GACGGCGCCTCCATCGCTGCCGG	Bomo_Chr1	883584	883607
Bm_sgRNA_56337	GCTGGAATAAGCGCGAGAGT	KWMTBOMO00031_exon_1	GCTGGAATAAGCGCGAGAGTCGG	Bomo_Chr1	883529	883552
Bm_sgRNA_75877	TCCTAGCCCAGTCTTCGTCC	KWMTBOMO00031_exon_1	TCCTAGCCCAGTCTTCGTCCTGG	Bomo_Chr1	883716	883739
Bm_sgRNA_76661	TCGCGCCTCTTCAACGCCCT	KWMTBOMO00031_exon_1	TCGCGCCTCTTCAACGCCCTGGG	Bomo_Chr1	883742	883765
Bm_sgRNA_20986	ATCGTAGCACCGACCTTATC	KWMTBOMO00033_exon_1	ATCGTAGCACCGACCTTATCCGG	Bomo_Chr1	1059427	1059450
Bm_sgRNA_28605	CAGCTATCTCGTTAGAGAGC	KWMTBOMO00033_exon_1	CAGCTATCTCGTTAGAGAGCAGG	Bomo_Chr1	1059690	1059713
Bm_sgRNA_38199	CGGCTTTGGCAGATCCGGTA	KWMTBOMO00033_exon_1	CGGCTTTGGCAGATCCGGTATGG	Bomo_Chr1	1059150	1059173
Bm_sgRNA_63433	GTATTCCGAGGGACAGCTCG	KWMTBOMO00033_exon_1	GTATTCCGAGGGACAGCTCGTGG	Bomo_Chr1	1059603	1059626
Bm_sgRNA_86424	TTAGGCCTATCGTTCACGCT	KWMTBOMO00033_exon_1	TTAGGCCTATCGTTCACGCTCGG	Bomo_Chr1	1059769	1059792
Bm_sgRNA_91203	TTTCGCTGTCTCGCCCATAC	KWMTBOMO00033_exon_1	TTTCGCTGTCTCGCCCATACCGG	Bomo_Chr1	1059164	1059187
Bm_sgRNA_03742	AACTGTCGTTGTATCGGTCG	KWMTBOMO00033_promoter	AACTGTCGTTGTATCGGTCGCGG	Bomo_Chr1	1058671	1058694
Bm_sgRNA_24622	ATTTTAAAGCGAACAGCTCG	KWMTBOMO00033_promoter	ATTTTAAAGCGAACAGCTCGCGG	Bomo_Chr1	1058621	1058644
Bm_sgRNA_72783	TATTCACAAAAATCGTGTCG	KWMTBOMO00033_promoter	TATTCACAAAAATCGTGTCGAGG	Bomo_Chr1	1058568	1058591
Bm_sgRNA_11994	ACTGCACCCCGACCCCGATA	KWMTBOMO00035_exon_1	ACTGCACCCCGACCCCGATACGG	Bomo_Chr1	1076667	1076690
Bm_sgRNA_31108	CCAAGTCGCAACCACAATGG	KWMTBOMO00035_exon_1	CCAAGTCGCAACCACAATGGTGG	Bomo_Chr1	1077333	1077356
Bm_sgRNA_90190	TTGTGGTTGCGACTTGGACA	KWMTBOMO00035_exon_1	TTGTGGTTGCGACTTGGACACGG	Bomo_Chr1	1077339	1077362
Bm_sgRNA_00010	AAAAAAAATAACATCGCTAG	KWMTBOMO00036_exon_3	AAAAAAAATAACATCGCTAGAGG	Bomo_Chr1	1099702	1099725
Bm_sgRNA_23958	ATTGCTTCTTCACTGTAGCC	KWMTBOMO00036_exon_4	ATTGCTTCTTCACTGTAGCCCGG	Bomo_Chr1	1096968	1096991
Bm_sgRNA_48855	GAGACTGCGCCATATCCTCC	KWMTBOMO00036_exon_4	GAGACTGCGCCATATCCTCCGGG	Bomo_Chr1	1096986	1097009
Bm_sgRNA_58386	GGATATGGCGCAGTCTCTTT	KWMTBOMO00036_exon_4	GGATATGGCGCAGTCTCTTTCGG	Bomo_Chr1	1096992	1097015
Bm_sgRNA_88061	TTCGGAAAGTTATAGGTAAC	KWMTBOMO00036_exon_4	TTCGGAAAGTTATAGGTAACTGG	Bomo_Chr1	1097010	1097033
Bm_sgRNA_20372	ATCATTCGAATGCACATTAG	KWMTBOMO00037_exon_1	ATCATTCGAATGCACATTAGAGG	Bomo_Chr1	1209702	1209725
Bm_sgRNA_33949	CCTACTACGATCGCTAGGAT	KWMTBOMO00037_exon_1	CCTACTACGATCGCTAGGATGGG	Bomo_Chr1	1209620	1209643
Bm_sgRNA_36248	CGATCGCTAGGATGGGCGCG	KWMTBOMO00037_exon_1	CGATCGCTAGGATGGGCGCGCGG	Bomo_Chr1	1209627	1209650
Bm_sgRNA_52154	GCACCCTCATTTTGAAGCGG	KWMTBOMO00037_exon_1	GCACCCTCATTTTGAAGCGGTGG	Bomo_Chr1	1209544	1209567
Bm_sgRNA_65839	GTGGTGACTATCTGCACTGA	KWMTBOMO00037_exon_1	GTGGTGACTATCTGCACTGACGG	Bomo_Chr1	1209563	1209586
Bm_sgRNA_73845	TCACCACCGCTTCAAAATGA	KWMTBOMO00037_exon_1	TCACCACCGCTTCAAAATGAGGG	Bomo_Chr1	1209547	1209570
Bm_sgRNA_80202	TGAGCACCCTCATTTTGAAG	KWMTBOMO00037_exon_1	TGAGCACCCTCATTTTGAAGCGG	Bomo_Chr1	1209541	1209564
Bm_sgRNA_76759	TCGCTTGACACGTCCTGGAT	KWMTBOMO00037_exon_2	TCGCTTGACACGTCCTGGATCGG	Bomo_Chr1	1207471	1207494
Bm_sgRNA_05253	AAGTGGAAGAATGCGAGGGA	KWMTBOMO00038_exon_1	AAGTGGAAGAATGCGAGGGAGGG	KWMTBOMO00038_exon_1	1485	1508
Bm_sgRNA_62931	GTAGAGAGCGTAGAGGAGTG	KWMTBOMO00038_exon_1	GTAGAGAGCGTAGAGGAGTGGGG	KWMTBOMO00038_exon_1	929	952
Bm_sgRNA_65054	GTGATCGGACGGTAACTGGA	KWMTBOMO00038_exon_1	GTGATCGGACGGTAACTGGAGGG	KWMTBOMO00038_exon_1	1335	1358
Bm_sgRNA_83863	TGTAGAGAGCGTAGAGGAGT	KWMTBOMO00038_exon_1	TGTAGAGAGCGTAGAGGAGTGGG	KWMTBOMO00038_exon_1	928	951
Bm_sgRNA_05525	AATAATACCGGTCCTATCCA	KWMTBOMO00039_exon_2	AATAATACCGGTCCTATCCAAGG	Bomo_Chr1	1269077	1269100
Bm_sgRNA_16758	AGGTGATTTTTGCACAGCCT	KWMTBOMO00039_exon_2	AGGTGATTTTTGCACAGCCTTGG	Bomo_Chr1	1269094	1269117
Bm_sgRNA_24827	ATTTTTGCACAGCCTTGGAT	KWMTBOMO00039_exon_2	ATTTTTGCACAGCCTTGGATAGG	Bomo_Chr1	1269089	1269112
Bm_sgRNA_81031	TGCACAGCCTTGGATAGGAC	KWMTBOMO00039_exon_2	TGCACAGCCTTGGATAGGACCGG	Bomo_Chr1	1269084	1269107
Bm_sgRNA_86490	TTAGTGAATATTTTAAGGCA	KWMTBOMO00039_exon_2	TTAGTGAATATTTTAAGGCACGG	Bomo_Chr1	1269015	1269038
Bm_sgRNA_16136	AGGATGGTGATACTTCCCCT	KWMTBOMO00039_promoter	AGGATGGTGATACTTCCCCTTGG	Bomo_Chr1	1268569	1268592
Bm_sgRNA_15747	AGCTGTATGTGGATAAGAAA	KWMTBOMO00040_exon_2	AGCTGTATGTGGATAAGAAAAGG	Bomo_Chr1	1277958	1277981
Bm_sgRNA_68843	TAAGACGTAAGACGTTTTAC	KWMTBOMO00040_exon_2	TAAGACGTAAGACGTTTTACCGG	Bomo_Chr1	1278075	1278098
Bm_sgRNA_14577	AGCAATGCGGGCCTTGCGTA	KWMTBOMO00041_exon_1	AGCAATGCGGGCCTTGCGTATGG	Bomo_Chr1	1293244	1293267
Bm_sgRNA_22645	ATGTCTGAAGGGAGCAATGC	KWMTBOMO00041_exon_1	ATGTCTGAAGGGAGCAATGCGGG	Bomo_Chr1	1293256	1293279
Bm_sgRNA_12502	ACTTCTACCACCAATTGGGA	KWMTBOMO00041_exon_2	ACTTCTACCACCAATTGGGAAGG	Bomo_Chr1	1286266	1286289
Bm_sgRNA_24442	ATTTCTGCCTTCCCAATTGG	KWMTBOMO00041_exon_2	ATTTCTGCCTTCCCAATTGGTGG	Bomo_Chr1	1286259	1286282
Bm_sgRNA_11375	ACTACGGACGCCGAGGTCCG	KWMTBOMO00041_promoter	ACTACGGACGCCGAGGTCCGAGG	Bomo_Chr1	1293363	1293386
Bm_sgRNA_17194	AGTATTAGCTGGTGGCTCCA	KWMTBOMO00042_exon_1	AGTATTAGCTGGTGGCTCCACGG	Bomo_Chr1	1297509	1297532
Bm_sgRNA_34861	CCTTGGAGGTGATAAGAGTG	KWMTBOMO00042_exon_1	CCTTGGAGGTGATAAGAGTGAGG	Bomo_Chr1	1297547	1297570
Bm_sgRNA_39245	CGTGAAGTGTACAAAACCAG	KWMTBOMO00042_exon_1	CGTGAAGTGTACAAAACCAGAGG	Bomo_Chr1	1297615	1297638
Bm_sgRNA_41233	CTCCAAGGGACTGACCAATA	KWMTBOMO00042_exon_1	CTCCAAGGGACTGACCAATAAGG	Bomo_Chr1	1297532	1297555
Bm_sgRNA_59276	GGCCTTATTGGTCAGTCCCT	KWMTBOMO00042_exon_1	GGCCTTATTGGTCAGTCCCTTGG	Bomo_Chr1	1297530	1297553
Bm_sgRNA_83534	TGGTGGCTCCACGGCCTTAT	KWMTBOMO00042_exon_1	TGGTGGCTCCACGGCCTTATTGG	Bomo_Chr1	1297518	1297541
Bm_sgRNA_19950	ATATTTCATAGAGCCTAAAG	KWMTBOMO00042_promoter	ATATTTCATAGAGCCTAAAGGGG	Bomo_Chr1	1297326	1297349
Bm_sgRNA_50420	GATATTTCATAGAGCCTAAA	KWMTBOMO00042_promoter	GATATTTCATAGAGCCTAAAGGG	Bomo_Chr1	1297325	1297348
Bm_sgRNA_33230	CCGCCGCCGCCTCCGGGTGT	KWMTBOMO00043_exon_2	CCGCCGCCGCCTCCGGGTGTAGG	Bomo_Chr1	1313020	1313043
Bm_sgRNA_36867	CGCCGCCGCCTCCGGGTGTA	KWMTBOMO00043_exon_2	CGCCGCCGCCTCCGGGTGTAGGG	Bomo_Chr1	1313021	1313044
Bm_sgRNA_41056	CTCACTCGTGGTTGCCGTAG	KWMTBOMO00043_exon_2	CTCACTCGTGGTTGCCGTAGTGG	Bomo_Chr1	1313051	1313074
Bm_sgRNA_64224	GTCGCATCCCCTACACCCGG	KWMTBOMO00043_exon_2	GTCGCATCCCCTACACCCGGAGG	Bomo_Chr1	1313029	1313052
Bm_sgRNA_75469	TCCCCTACACCCGGAGGCGG	KWMTBOMO00043_exon_2	TCCCCTACACCCGGAGGCGGCGG	Bomo_Chr1	1313023	1313046
Bm_sgRNA_83907	TGTAGGGGATGCGACCACTA	KWMTBOMO00043_exon_2	TGTAGGGGATGCGACCACTACGG	Bomo_Chr1	1313037	1313060
Bm_sgRNA_01536	AAAGCCTTTCTAAAGCGACC	KWMTBOMO00043_promoter	AAAGCCTTTCTAAAGCGACCGGG	Bomo_Chr1	1313397	1313420
Bm_sgRNA_38295	CGGGCTAGTAGGGATGCATC	KWMTBOMO00043_promoter	CGGGCTAGTAGGGATGCATCAGG	Bomo_Chr1	1313369	1313392
Bm_sgRNA_59747	GGCTAGTAGGGATGCATCAG	KWMTBOMO00043_promoter	GGCTAGTAGGGATGCATCAGGGG	Bomo_Chr1	1313367	1313390
Bm_sgRNA_12430	ACTTCACTAGTTATGTTTTT	KWMTBOMO00045_exon_1	ACTTCACTAGTTATGTTTTTAGG	Bomo_Chr1	1333088	1333111
Bm_sgRNA_12645	ACTTTACTCAGAGGAATTAT	KWMTBOMO00045_exon_1	ACTTTACTCAGAGGAATTATAGG	Bomo_Chr1	1333169	1333192
Bm_sgRNA_35102	CGAACATAAACTTTACTCAG	KWMTBOMO00045_exon_1	CGAACATAAACTTTACTCAGAGG	Bomo_Chr1	1333178	1333201
Bm_sgRNA_68368	TAAAGTTTATGTTCGAGTTT	KWMTBOMO00045_exon_1	TAAAGTTTATGTTCGAGTTTCGG	Bomo_Chr1	1333186	1333209
Bm_sgRNA_22546	ATGTATGGCGGTACCATAGG	KWMTBOMO00045_exon_2	ATGTATGGCGGTACCATAGGAGG	Bomo_Chr1	1333694	1333717
Bm_sgRNA_37047	CGCGAGGGAAGCACGACTAG	KWMTBOMO00045_exon_2	CGCGAGGGAAGCACGACTAGTGG	Bomo_Chr1	1333369	1333392
Bm_sgRNA_85237	TGTTGTGTGACTTAGGCTCC	KWMTBOMO00045_promoter	TGTTGTGTGACTTAGGCTCCAGG	Bomo_Chr1	1333000	1333023
Bm_sgRNA_90374	TTTAAAATTTGAGCTGAACC	KWMTBOMO00045_promoter	TTTAAAATTTGAGCTGAACCTGG	Bomo_Chr1	1332982	1333005
Bm_sgRNA_06146	AATCCTAACTGGTTCTTAGG	KWMTBOMO00046_exon_1	AATCCTAACTGGTTCTTAGGAGG	Bomo_Chr1	1334976	1334999
Bm_sgRNA_08670	ACAGTAAGGAATCGTGATAA	KWMTBOMO00046_exon_1	ACAGTAAGGAATCGTGATAAGGG	Bomo_Chr1	1334865	1334888
Bm_sgRNA_26060	CAAGCGAGATGGTTACACAT	KWMTBOMO00046_exon_1	CAAGCGAGATGGTTACACATTGG	Bomo_Chr1	1334840	1334863
Bm_sgRNA_26926	CACAGTAAGGAATCGTGATA	KWMTBOMO00046_exon_1	CACAGTAAGGAATCGTGATAAGG	Bomo_Chr1	1334864	1334887
Bm_sgRNA_43826	CTTATCACGATTCCTTACTG	KWMTBOMO00046_exon_1	CTTATCACGATTCCTTACTGTGG	Bomo_Chr1	1334863	1334886
Bm_sgRNA_02178	AAATGACCTCGTTGGACACG	KWMTBOMO00048_exon_1	AAATGACCTCGTTGGACACGCGG	KWMTBOMO00048_exon_1	558	581
Bm_sgRNA_04091	AAGACTCTAGTGTAGATGAC	KWMTBOMO00048_exon_1	AAGACTCTAGTGTAGATGACAGG	KWMTBOMO00048_exon_1	160	183
Bm_sgRNA_11565	ACTCAAGACATCCTTGATTA	KWMTBOMO00048_exon_1	ACTCAAGACATCCTTGATTAAGG	KWMTBOMO00048_exon_1	935	958
Bm_sgRNA_12446	ACTTCATCCGGCACGAAGAC	KWMTBOMO00048_exon_1	ACTTCATCCGGCACGAAGACTGG	KWMTBOMO00048_exon_1	817	840
Bm_sgRNA_17591	AGTGACTCCAAATTGGGATG	KWMTBOMO00048_exon_1	AGTGACTCCAAATTGGGATGAGG	KWMTBOMO00048_exon_1	915	938
Bm_sgRNA_31868	CCAGTGCCTGTTATTGAACA	KWMTBOMO00048_exon_1	CCAGTGCCTGTTATTGAACATGG	KWMTBOMO00048_exon_1	721	744
Bm_sgRNA_37183	CGCGGCATATCTTCAGTCTC	KWMTBOMO00048_exon_1	CGCGGCATATCTTCAGTCTCAGG	KWMTBOMO00048_exon_1	395	418
Bm_sgRNA_38872	CGTATTCCGCGTGTCCAACG	KWMTBOMO00048_exon_1	CGTATTCCGCGTGTCCAACGAGG	KWMTBOMO00048_exon_1	552	575
Bm_sgRNA_40188	CTACAACAAACAAAATGATA	KWMTBOMO00048_exon_1	CTACAACAAACAAAATGATAAGG	KWMTBOMO00048_exon_1	497	520
Bm_sgRNA_46474	GAAGAGCACACAAGACTGGC	KWMTBOMO00048_exon_1	GAAGAGCACACAAGACTGGCTGG	KWMTBOMO00048_exon_1	779	802
Bm_sgRNA_49082	GAGCACACAAGACTGGCTGG	KWMTBOMO00048_exon_1	GAGCACACAAGACTGGCTGGCGG	KWMTBOMO00048_exon_1	782	805
Bm_sgRNA_49705	GAGGTACATTTTTGTGAGAA	KWMTBOMO00048_exon_1	GAGGTACATTTTTGTGAGAAAGG	KWMTBOMO00048_exon_1	630	653
Bm_sgRNA_60816	GGGTGTTAAATGAAGACTTA	KWMTBOMO00048_exon_1	GGGTGTTAAATGAAGACTTAGGG	KWMTBOMO00048_exon_1	319	342
Bm_sgRNA_60983	GGTACGATAAACGAATCTTT	KWMTBOMO00048_exon_1	GGTACGATAAACGAATCTTTTGG	KWMTBOMO00048_exon_1	121	144
Bm_sgRNA_68700	TAACGGATTCAAATCTGGAC	KWMTBOMO00048_exon_1	TAACGGATTCAAATCTGGACTGG	KWMTBOMO00048_exon_1	847	870
Bm_sgRNA_69243	TAATCTAACGGATTCAAATC	KWMTBOMO00048_exon_1	TAATCTAACGGATTCAAATCTGG	KWMTBOMO00048_exon_1	852	875
Bm_sgRNA_72325	TATGAGAAACAGGTTCCACA	KWMTBOMO00048_exon_1	TATGAGAAACAGGTTCCACAAGG	KWMTBOMO00048_exon_1	698	721
Bm_sgRNA_77390	TCGTTTGAATGCTCGTCTAA	KWMTBOMO00048_exon_1	TCGTTTGAATGCTCGTCTAATGG	KWMTBOMO00048_exon_1	371	394
Bm_sgRNA_85889	TTACAAGATATGGCAACACT	KWMTBOMO00048_exon_1	TTACAAGATATGGCAACACTTGG	KWMTBOMO00048_exon_1	872	895
Bm_sgRNA_88814	TTGAACATGGTATGAGAAAC	KWMTBOMO00048_exon_1	TTGAACATGGTATGAGAAACAGG	KWMTBOMO00048_exon_1	708	731
Bm_sgRNA_37857	CGGCAACTACATAGCACAGG	KWMTBOMO00049_promoter	CGGCAACTACATAGCACAGGTGG	Bomo_Chr1	1412531	1412554
Bm_sgRNA_40365	CTACGGCAACTACATAGCAC	KWMTBOMO00049_promoter	CTACGGCAACTACATAGCACAGG	Bomo_Chr1	1412528	1412551
Bm_sgRNA_07998	ACACAGGAATCGCACTCCGG	KWMTBOMO00050_exon_2	ACACAGGAATCGCACTCCGGAGG	Bomo_Chr1	1438983	1439006
Bm_sgRNA_33024	CCGAGCGAGCAAACCGTCTC	KWMTBOMO00050_exon_2	CCGAGCGAGCAAACCGTCTCAGG	Bomo_Chr1	1439034	1439057
Bm_sgRNA_33176	CCGCAGGCAGAGCACGAGTA	KWMTBOMO00050_exon_2	CCGCAGGCAGAGCACGAGTACGG	Bomo_Chr1	1439098	1439121
Bm_sgRNA_46771	GAAGGCACCAGCGGGTTCGT	KWMTBOMO00050_exon_2	GAAGGCACCAGCGGGTTCGTCGG	Bomo_Chr1	1438657	1438680
Bm_sgRNA_59460	GGCGCGGCTATATGAATGCG	KWMTBOMO00050_exon_2	GGCGCGGCTATATGAATGCGAGG	Bomo_Chr1	1439007	1439030
Bm_sgRNA_65634	GTGGCACCGGGACACGCAGA	KWMTBOMO00050_exon_2	GTGGCACCGGGACACGCAGAAGG	Bomo_Chr1	1438639	1438662
Bm_sgRNA_76679	TCGCGGCGGCAAGCAGCGTA	KWMTBOMO00050_exon_2	TCGCGGCGGCAAGCAGCGTATGG	Bomo_Chr1	1439203	1439226
Bm_sgRNA_83158	TGGGCAGGACGGGCACCGGT	KWMTBOMO00050_exon_2	TGGGCAGGACGGGCACCGGTAGG	Bomo_Chr1	1439183	1439206
Bm_sgRNA_92770	CCTTGATATTAAAGTCGATC	KWMTBOMO00051	CCTTGATATTAAAGTCGATCAGG	Bomo_Chr1	1459909	1459931
Bm_sgRNA_08816	ACATACTTCGTAGACGAAGA	KWMTBOMO00051_exon_4	ACATACTTCGTAGACGAAGAAGG	Bomo_Chr1	1455477	1455500
Bm_sgRNA_27825	CACTGGGAATAATCAGGACC	KWMTBOMO00051_exon_4	CACTGGGAATAATCAGGACCTGG	Bomo_Chr1	1455518	1455541
Bm_sgRNA_28944	CAGGTCCTGATTATTCCCAG	KWMTBOMO00051_exon_4	CAGGTCCTGATTATTCCCAGTGG	Bomo_Chr1	1455517	1455540
Bm_sgRNA_31664	CCAGCCCACTGGGAATAATC	KWMTBOMO00051_exon_4	CCAGCCCACTGGGAATAATCAGG	Bomo_Chr1	1455512	1455535
Bm_sgRNA_75849	TCCGTTGCTTCAGTCTGCAG	KWMTBOMO00051_exon_4	TCCGTTGCTTCAGTCTGCAGCGG	Bomo_Chr1	1455543	1455566
Bm_sgRNA_04609	AAGCTACCAGTTCCATGCCC	KWMTBOMO00053_exon_1	AAGCTACCAGTTCCATGCCCAGG	Bomo_Chr1	1521376	1521399
Bm_sgRNA_13157	AGAAGGAACGCCTCAGGACT	KWMTBOMO00053_exon_1	AGAAGGAACGCCTCAGGACTGGG	Bomo_Chr1	1520869	1520892
Bm_sgRNA_44565	CTTGCAGAAGCTTTGGCGGC	KWMTBOMO00053_exon_1	CTTGCAGAAGCTTTGGCGGCAGG	Bomo_Chr1	1520092	1520115
Bm_sgRNA_45387	GAAAAGCTGTATCGCCTGAG	KWMTBOMO00053_exon_1	GAAAAGCTGTATCGCCTGAGCGG	Bomo_Chr1	1519914	1519937
Bm_sgRNA_52080	GCACACCCTGGGCATGGAAC	KWMTBOMO00053_exon_1	GCACACCCTGGGCATGGAACTGG	Bomo_Chr1	1521382	1521405
Bm_sgRNA_89206	TTGCAAGAGACCTCACGTAC	KWMTBOMO00053_exon_1	TTGCAAGAGACCTCACGTACTGG	Bomo_Chr1	1521334	1521357
Bm_sgRNA_48486	GACTCCATGGGTCTACCACG	KWMTBOMO00053_promoter	GACTCCATGGGTCTACCACGTGG	Bomo_Chr1	1521814	1521837
Bm_sgRNA_85823	TTAATTAAAACAAATAATAA	KWMTBOMO00053_promoter	TTAATTAAAACAAATAATAATGG	Bomo_Chr1	1521638	1521661
Bm_sgRNA_70012	TACCTATGGCCTGTTACGTC	KWMTBOMO00054_exon_1	TACCTATGGCCTGTTACGTCAGG	Bomo_Chr1	1635587	1635610
Bm_sgRNA_77574	TCTAGACGCATTCCTGCGTC	KWMTBOMO00054_exon_1	TCTAGACGCATTCCTGCGTCGGG	Bomo_Chr1	1635764	1635787
Bm_sgRNA_88359	TTCTAGACGCATTCCTGCGT	KWMTBOMO00054_exon_1	TTCTAGACGCATTCCTGCGTCGG	Bomo_Chr1	1635763	1635786
Bm_sgRNA_88878	TTGAATTTGGATCCCGACGC	KWMTBOMO00054_exon_1	TTGAATTTGGATCCCGACGCAGG	Bomo_Chr1	1635776	1635799
Bm_sgRNA_89949	TTGTACGCGTCACTCCGATA	KWMTBOMO00054_exon_1	TTGTACGCGTCACTCCGATATGG	Bomo_Chr1	1635651	1635674
Bm_sgRNA_25916	CAAGACCGCTGTGTCTTCGA	KWMTBOMO00054_exon_2	CAAGACCGCTGTGTCTTCGAAGG	Bomo_Chr1	1636063	1636086
Bm_sgRNA_73739	TCACAAAGTGAAGAAACCTT	KWMTBOMO00054_exon_2	TCACAAAGTGAAGAAACCTTTGG	Bomo_Chr1	1636025	1636048
Bm_sgRNA_67331	GTTGGTCACCAATCTACTGT	KWMTBOMO00054_promoter	GTTGGTCACCAATCTACTGTTGG	Bomo_Chr1	1635483	1635506
Bm_sgRNA_20774	ATCGAGTGGGTAAGTCCAGT	KWMTBOMO00055_exon_20	ATCGAGTGGGTAAGTCCAGTCGG	Bomo_Chr1	1665874	1665897
Bm_sgRNA_57163	GGAAATTAAATGTTCAGAAG	KWMTBOMO00055_exon_20	GGAAATTAAATGTTCAGAAGAGG	Bomo_Chr1	1665895	1665918
Bm_sgRNA_37161	CGCGGAAGGAGGAGCGCGTT	KWMTBOMO00055_exon_21	CGCGGAAGGAGGAGCGCGTTGGG	Bomo_Chr1	1665136	1665159
Bm_sgRNA_50235	GATACGTTGCTTGCACTCTA	KWMTBOMO00055_exon_22	GATACGTTGCTTGCACTCTACGG	Bomo_Chr1	1663969	1663992
Bm_sgRNA_79080	TCTTTGTACCAGGAGACTTT	KWMTBOMO00055_exon_22	TCTTTGTACCAGGAGACTTTGGG	Bomo_Chr1	1663908	1663931
Bm_sgRNA_89944	TTGTACCAGGAGACTTTGGG	KWMTBOMO00055_exon_22	TTGTACCAGGAGACTTTGGGCGG	Bomo_Chr1	1663911	1663934
Bm_sgRNA_13643	AGACTAGTACCCAAGACTTG	KWMTBOMO00056_exon_2	AGACTAGTACCCAAGACTTGCGG	Bomo_Chr1	1774937	1774960
Bm_sgRNA_35284	CGAAGTGAAACCGCAAGTCT	KWMTBOMO00056_exon_2	CGAAGTGAAACCGCAAGTCTTGG	Bomo_Chr1	1774927	1774950
Bm_sgRNA_46371	GAAGAAGCCACTCTTCTGGA	KWMTBOMO00056_exon_2	GAAGAAGCCACTCTTCTGGATGG	Bomo_Chr1	1774897	1774920
Bm_sgRNA_46918	GAAGTGAAACCGCAAGTCTT	KWMTBOMO00056_exon_2	GAAGTGAAACCGCAAGTCTTGGG	Bomo_Chr1	1774928	1774951
Bm_sgRNA_81829	TGCGGTTTCACTTCGAAGAC	KWMTBOMO00056_exon_2	TGCGGTTTCACTTCGAAGACGGG	Bomo_Chr1	1774919	1774942
Bm_sgRNA_89244	TTGCAGAGAACGAAGCGGGC	KWMTBOMO00056_exon_2	TTGCAGAGAACGAAGCGGGCGGG	Bomo_Chr1	1774970	1774993
Bm_sgRNA_38806	CGTATAAAAGCTTAGTGCGG	KWMTBOMO00056_promoter	CGTATAAAAGCTTAGTGCGGCGG	Bomo_Chr1	1775157	1775180
Bm_sgRNA_45189	CTTTTATACGCGCGCCTATC	KWMTBOMO00056_promoter	CTTTTATACGCGCGCCTATCTGG	Bomo_Chr1	1775170	1775193
Bm_sgRNA_59446	GGCGCGAGGGCGAGCCAGAT	KWMTBOMO00056_promoter	GGCGCGAGGGCGAGCCAGATAGG	Bomo_Chr1	1775184	1775207
Bm_sgRNA_37780	CGGAGTTCATGTCACGGGTC	KWMTBOMO00057_exon_1	CGGAGTTCATGTCACGGGTCTGG	Bomo_Chr1	1833502	1833525
Bm_sgRNA_49737	GAGGTCGGAGTTCATGTCAC	KWMTBOMO00057_exon_1	GAGGTCGGAGTTCATGTCACGGG	Bomo_Chr1	1833507	1833530
Bm_sgRNA_51452	GATTGAGTTCAACTTGCGTT	KWMTBOMO00057_exon_1	GATTGAGTTCAACTTGCGTTTGG	Bomo_Chr1	1833419	1833442
Bm_sgRNA_87099	TTCAACTTGCGTTTGGTACG	KWMTBOMO00057_exon_1	TTCAACTTGCGTTTGGTACGTGG	Bomo_Chr1	1833426	1833449
Bm_sgRNA_87172	TTCACATCACAGTTGGAGGT	KWMTBOMO00057_exon_1	TTCACATCACAGTTGGAGGTCGG	Bomo_Chr1	1833522	1833545
Bm_sgRNA_26539	CAATGGGTGTCAGTGACGTA	KWMTBOMO00057_exon_2	CAATGGGTGTCAGTGACGTACGG	Bomo_Chr1	1831066	1831089
Bm_sgRNA_70277	TACGTCACTGACACCCATTG	KWMTBOMO00057_exon_2	TACGTCACTGACACCCATTGAGG	Bomo_Chr1	1831069	1831092
Bm_sgRNA_76960	TCGGGCGTGCATCGAAGCCT	KWMTBOMO00057_exon_2	TCGGGCGTGCATCGAAGCCTCGG	Bomo_Chr1	1831021	1831044
Bm_sgRNA_79948	TGACGGAGCGAACGAATGAC	KWMTBOMO00057_exon_2	TGACGGAGCGAACGAATGACAGG	Bomo_Chr1	1830992	1831015
Bm_sgRNA_82601	TGGATATGCTTGGAGTGCTC	KWMTBOMO00057_exon_2	TGGATATGCTTGGAGTGCTCGGG	Bomo_Chr1	1831039	1831062
Bm_sgRNA_06136	AATCCGATGGACTCCATGGG	KWMTBOMO00057_exon_4	AATCCGATGGACTCCATGGGCGG	Bomo_Chr1	1802257	1802280
Bm_sgRNA_36245	CGATCGAGAAGCCTCAGGAG	KWMTBOMO00057_exon_4	CGATCGAGAAGCCTCAGGAGTGG	Bomo_Chr1	1802222	1802245
Bm_sgRNA_42421	CTGAGGCTTCTCGATCGTCT	KWMTBOMO00057_exon_4	CTGAGGCTTCTCGATCGTCTCGG	Bomo_Chr1	1802228	1802251
Bm_sgRNA_44920	CTTTAGCTGAGGGCCGCCCA	KWMTBOMO00057_exon_4	CTTTAGCTGAGGGCCGCCCATGG	Bomo_Chr1	1802270	1802293
Bm_sgRNA_60322	GGGCCGCCCATGGAGTCCAT	KWMTBOMO00057_exon_4	GGGCCGCCCATGGAGTCCATCGG	Bomo_Chr1	1802260	1802283
Bm_sgRNA_34215	CCTCGCCCCCGCCTCATCGA	KWMTBOMO00058_exon_1	CCTCGCCCCCGCCTCATCGACGG	KWMTBOMO00058_exon_1	445	468
Bm_sgRNA_42293	CTGAAGGATAACCGGGGGAG	KWMTBOMO00058_exon_1	CTGAAGGATAACCGGGGGAGGGG	KWMTBOMO00058_exon_1	642	665
Bm_sgRNA_46226	GAACTCCGCGTTGTAATACG	KWMTBOMO00058_exon_1	GAACTCCGCGTTGTAATACGCGG	KWMTBOMO00058_exon_1	851	874
Bm_sgRNA_48219	GACGCGGCGACGGAGTGGCA	KWMTBOMO00058_exon_1	GACGCGGCGACGGAGTGGCACGG	KWMTBOMO00058_exon_1	595	618
Bm_sgRNA_52260	GCACGGGCTGGGGGCGCAAC	KWMTBOMO00058_exon_1	GCACGGGCTGGGGGCGCAACGGG	KWMTBOMO00058_exon_1	578	601
Bm_sgRNA_52663	GCAGCTTTTCTCGCCAGTAT	KWMTBOMO00058_exon_1	GCAGCTTTTCTCGCCAGTATAGG	KWMTBOMO00058_exon_1	281	304
Bm_sgRNA_58844	GGCAGGCACGACAGAGGCTG	KWMTBOMO00058_exon_1	GGCAGGCACGACAGAGGCTGCGG	KWMTBOMO00058_exon_1	246	269
Bm_sgRNA_63340	GTATGCACACCGGTCGCGGT	KWMTBOMO00058_exon_1	GTATGCACACCGGTCGCGGTAGG	KWMTBOMO00058_exon_1	951	974
Bm_sgRNA_04801	AAGGAGTTCCCTAATATCGT	KWMTBOMO00058_exon_2	AAGGAGTTCCCTAATATCGTCGG	KWMTBOMO00058_exon_2	780	803
Bm_sgRNA_08864	ACATCACCTCGACATTAGAT	KWMTBOMO00058_exon_2	ACATCACCTCGACATTAGATAGG	KWMTBOMO00058_exon_2	708	731
Bm_sgRNA_34201	CCTCGATACGCGCCTACGAC	KWMTBOMO00058_exon_2	CCTCGATACGCGCCTACGACAGG	KWMTBOMO00058_exon_2	816	839
Bm_sgRNA_38438	CGGTAGTAAGACCTTTGGGA	KWMTBOMO00058_exon_2	CGGTAGTAAGACCTTTGGGAGGG	KWMTBOMO00058_exon_2	950	973
Bm_sgRNA_39006	CGTCCCGTCGTTATGAAGCT	KWMTBOMO00058_exon_2	CGTCCCGTCGTTATGAAGCTCGG	KWMTBOMO00058_exon_2	527	550
Bm_sgRNA_39667	CGTTCCCGTCACGAGGACTG	KWMTBOMO00058_exon_2	CGTTCCCGTCACGAGGACTGTGG	KWMTBOMO00058_exon_2	565	588
Bm_sgRNA_43754	CTTAGAACGATCTTATCCGG	KWMTBOMO00058_exon_2	CTTAGAACGATCTTATCCGGTGG	KWMTBOMO00058_exon_2	221	244
Bm_sgRNA_59802	GGCTCTTCTATAGTAAATGA	KWMTBOMO00058_exon_2	GGCTCTTCTATAGTAAATGACGG	KWMTBOMO00058_exon_2	90	113
Bm_sgRNA_60130	GGGAGCTCTGTCATTCTGGC	KWMTBOMO00058_exon_2	GGGAGCTCTGTCATTCTGGCGGG	KWMTBOMO00058_exon_2	272	295
Bm_sgRNA_60169	GGGATAGAGTCCGGGTTAAA	KWMTBOMO00058_exon_2	GGGATAGAGTCCGGGTTAAACGG	KWMTBOMO00058_exon_2	641	664
Bm_sgRNA_66038	GTGTGCCGAATCTCACTGAC	KWMTBOMO00058_exon_2	GTGTGCCGAATCTCACTGACGGG	KWMTBOMO00058_exon_2	164	187
Bm_sgRNA_68227	TAAACGGACGCGATAACGAT	KWMTBOMO00058_exon_2	TAAACGGACGCGATAACGATCGG	KWMTBOMO00058_exon_2	194	217
Bm_sgRNA_05462	AATAAAGCTAAATGGGTCGG	KWMTBOMO00058_exon_3	AATAAAGCTAAATGGGTCGGCGG	KWMTBOMO00058_exon_3	853	876
Bm_sgRNA_12066	ACTGCGGTGCTATTTCAGAG	KWMTBOMO00058_exon_3	ACTGCGGTGCTATTTCAGAGGGG	KWMTBOMO00058_exon_3	1006	1029
Bm_sgRNA_13800	AGAGACTTCGTCTCATCCAA	KWMTBOMO00058_exon_3	AGAGACTTCGTCTCATCCAAGGG	KWMTBOMO00058_exon_3	463	486
Bm_sgRNA_23673	ATTCTTATCGATGAACAATT	KWMTBOMO00058_exon_3	ATTCTTATCGATGAACAATTCGG	KWMTBOMO00058_exon_3	487	510
Bm_sgRNA_24681	ATTTTCAAACTATTCAACAT	KWMTBOMO00058_exon_3	ATTTTCAAACTATTCAACATGGG	KWMTBOMO00058_exon_3	658	681
Bm_sgRNA_25567	CAACATCACGATGAGTTGGA	KWMTBOMO00058_exon_3	CAACATCACGATGAGTTGGACGG	KWMTBOMO00058_exon_3	263	286
Bm_sgRNA_35498	CGACCAAAACCGTTATACAC	KWMTBOMO00058_exon_3	CGACCAAAACCGTTATACACGGG	KWMTBOMO00058_exon_3	580	603
Bm_sgRNA_46023	GAACCACTGTCCTAGGGCTA	KWMTBOMO00058_exon_3	GAACCACTGTCCTAGGGCTAGGG	KWMTBOMO00058_exon_3	947	970
Bm_sgRNA_47283	GAATGTCATCGATGCATCCA	KWMTBOMO00058_exon_3	GAATGTCATCGATGCATCCAGGG	KWMTBOMO00058_exon_3	1139	1162
Bm_sgRNA_73968	TCACGGAGCACATTCTTGTG	KWMTBOMO00058_exon_3	TCACGGAGCACATTCTTGTGGGG	KWMTBOMO00058_exon_3	551	574
Bm_sgRNA_19260	ATAGAGGCACCCGTCACGTG	KWMTBOMO00058_promoter	ATAGAGGCACCCGTCACGTGCGG	Bomo_Chr1	1816196	1816219
Bm_sgRNA_05866	AATATCTGGATATCATGCAC	KWMTBOMO00059_exon_2	AATATCTGGATATCATGCACAGG	Bomo_Chr1	1835056	1835079
Bm_sgRNA_43009	CTGGATATCATGCACAGGAA	KWMTBOMO00059_exon_2	CTGGATATCATGCACAGGAATGG	Bomo_Chr1	1835061	1835084
Bm_sgRNA_56691	GCTTCAATGCTGTTCAACTT	KWMTBOMO00059_exon_2	GCTTCAATGCTGTTCAACTTCGG	Bomo_Chr1	1835031	1835054
Bm_sgRNA_65186	GTGCATGATATCCAGATATT	KWMTBOMO00059_exon_2	GTGCATGATATCCAGATATTCGG	Bomo_Chr1	1835053	1835076
Bm_sgRNA_01447	AAAGATGATAGACCTGTGCC	KWMTBOMO00060_exon_1	AAAGATGATAGACCTGTGCCTGG	Bomo_Chr1	1903204	1903227
Bm_sgRNA_11087	ACGTCGAGACCGTTGCTACA	KWMTBOMO00060_exon_1	ACGTCGAGACCGTTGCTACATGG	Bomo_Chr1	1903707	1903730
Bm_sgRNA_14892	AGCCACAAACCACTGCTTCC	KWMTBOMO00060_exon_1	AGCCACAAACCACTGCTTCCAGG	Bomo_Chr1	1903089	1903112
Bm_sgRNA_34035	CCTATTGTATACTTTGAGAC	KWMTBOMO00060_exon_1	CCTATTGTATACTTTGAGACTGG	Bomo_Chr1	1903050	1903073
Bm_sgRNA_45712	GAAATAAAGCCTGGAAGCAG	KWMTBOMO00060_exon_1	GAAATAAAGCCTGGAAGCAGTGG	Bomo_Chr1	1903098	1903121
Bm_sgRNA_61660	GGTGCCGAAACTTCATCTTA	KWMTBOMO00060_exon_1	GGTGCCGAAACTTCATCTTATGG	Bomo_Chr1	1903570	1903593
Bm_sgRNA_66225	GTTAAATTGATTTACCACTA	KWMTBOMO00060_exon_1	GTTAAATTGATTTACCACTAAGG	Bomo_Chr1	1903853	1903876
Bm_sgRNA_86570	TTATAATTACTAAACCTTAG	KWMTBOMO00060_exon_1	TTATAATTACTAAACCTTAGTGG	Bomo_Chr1	1903867	1903890
Bm_sgRNA_10072	ACCTGAGTACTGAACGTCGC	KWMTBOMO00061_exon_2	ACCTGAGTACTGAACGTCGCCGG	Bomo_Chr1	1913389	1913412
Bm_sgRNA_32646	CCCGGCGACGTTCAGTACTC	KWMTBOMO00061_exon_2	CCCGGCGACGTTCAGTACTCAGG	Bomo_Chr1	1913390	1913413
Bm_sgRNA_34412	CCTGAGTACTGAACGTCGCC	KWMTBOMO00061_exon_2	CCTGAGTACTGAACGTCGCCGGG	Bomo_Chr1	1913390	1913413
Bm_sgRNA_41546	CTCCTTGTGCAAACTTCCTC	KWMTBOMO00061_exon_2	CTCCTTGTGCAAACTTCCTCTGG	Bomo_Chr1	1913348	1913371
Bm_sgRNA_53490	GCCCAGAGGAAGTTTGCACA	KWMTBOMO00061_exon_2	GCCCAGAGGAAGTTTGCACAAGG	Bomo_Chr1	1913346	1913369
Bm_sgRNA_74433	TCAGTACTCAGGTTGAGCTG	KWMTBOMO00061_exon_2	TCAGTACTCAGGTTGAGCTGAGG	Bomo_Chr1	1913379	1913402
Bm_sgRNA_20614	ATCCGTTTATACTTCAGAAG	KWMTBOMO00062_promoter	ATCCGTTTATACTTCAGAAGTGG	Bomo_Chr1	1945440	1945463
Bm_sgRNA_75391	TCCCACTTCTGAAGTATAAA	KWMTBOMO00062_promoter	TCCCACTTCTGAAGTATAAACGG	Bomo_Chr1	1945442	1945465
Bm_sgRNA_75855	TCCGTTTATACTTCAGAAGT	KWMTBOMO00062_promoter	TCCGTTTATACTTCAGAAGTGGG	Bomo_Chr1	1945441	1945464
Bm_sgRNA_46585	GAAGCACCTGCAGGCACACA	KWMTBOMO00064_exon_3	GAAGCACCTGCAGGCACACAAGG	Bomo_Chr1	1973342	1973365
Bm_sgRNA_52291	GCACTACCTTGTGTGCCTGC	KWMTBOMO00064_exon_3	GCACTACCTTGTGTGCCTGCAGG	Bomo_Chr1	1973336	1973359
Bm_sgRNA_65487	GTGCTTCCCTTCAGCAGCGA	KWMTBOMO00064_exon_3	GTGCTTCCCTTCAGCAGCGAGGG	Bomo_Chr1	1973358	1973381
Bm_sgRNA_77415	TCTAAACACGCAGACTCTGG	KWMTBOMO00064_exon_3	TCTAAACACGCAGACTCTGGTGG	Bomo_Chr1	1973387	1973410
Bm_sgRNA_82057	TGCTGAAGGGAAGCACCTGC	KWMTBOMO00064_exon_3	TGCTGAAGGGAAGCACCTGCAGG	Bomo_Chr1	1973351	1973374
Bm_sgRNA_82599	TGGATATGAAGTTAGGCTGG	KWMTBOMO00064_exon_3	TGGATATGAAGTTAGGCTGGTGG	Bomo_Chr1	1973423	1973446
Bm_sgRNA_15293	AGCGCCAGTCGGTAGCATAG	KWMTBOMO00065_exon_2	AGCGCCAGTCGGTAGCATAGCGG	Bomo_Chr1	1986588	1986611
Bm_sgRNA_38736	CGTACTGATGAACTCAAGGA	KWMTBOMO00065_exon_2	CGTACTGATGAACTCAAGGAAGG	Bomo_Chr1	1986449	1986472
Bm_sgRNA_72576	TATGTATGTGCCTTCAAAAT	KWMTBOMO00065_promoter	TATGTATGTGCCTTCAAAATGGG	Bomo_Chr1	1983500	1983523
Bm_sgRNA_50664	GATCGGTGATCGACATATGG	KWMTBOMO00066_exon_1	GATCGGTGATCGACATATGGGGG	Bomo_Chr1	1996866	1996889
Bm_sgRNA_77591	TCTAGCGATCAGATCGTGCG	KWMTBOMO00066_exon_1	TCTAGCGATCAGATCGTGCGGGG	Bomo_Chr1	1996970	1996993
Bm_sgRNA_81344	TGCCACTCGCCGACTTCTAG	KWMTBOMO00066_exon_1	TGCCACTCGCCGACTTCTAGAGG	Bomo_Chr1	1997119	1997142
Bm_sgRNA_83844	TGTACTTGATCGTGTGTCCC	KWMTBOMO00066_exon_1	TGTACTTGATCGTGTGTCCCGGG	Bomo_Chr1	1997006	1997029
Bm_sgRNA_83313	TGGGTTATTAATCTAGTATG	KWMTBOMO00066_promoter	TGGGTTATTAATCTAGTATGTGG	Bomo_Chr1	1997275	1997298
Bm_sgRNA_86469	TTAGTATTCTTGGTCAACCG	KWMTBOMO00067_exon_1	TTAGTATTCTTGGTCAACCGAGG	Bomo_Chr1	2048496	2048519
Bm_sgRNA_45129	CTTTGTAACAAGAACTGCAG	KWMTBOMO00067_exon_2	CTTTGTAACAAGAACTGCAGAGG	Bomo_Chr1	2035784	2035807
Bm_sgRNA_52326	GCACTCTTAGAGAACCAGCT	KWMTBOMO00067_exon_2	GCACTCTTAGAGAACCAGCTCGG	Bomo_Chr1	2035884	2035907
Bm_sgRNA_19527	ATATAACCGTGGCCACGGGA	KWMTBOMO00067_exon_6	ATATAACCGTGGCCACGGGAGGG	Bomo_Chr1	2013155	2013178
Bm_sgRNA_25171	CAAAGATATAACCGTGGCCA	KWMTBOMO00067_exon_6	CAAAGATATAACCGTGGCCACGG	Bomo_Chr1	2013160	2013183
Bm_sgRNA_33466	CCGGCGAGCACGTTCACAAC	KWMTBOMO00067_exon_6	CCGGCGAGCACGTTCACAACTGG	Bomo_Chr1	2013122	2013145
Bm_sgRNA_53289	GCCACGGTTATATCTTTGAT	KWMTBOMO00067_exon_6	GCCACGGTTATATCTTTGATTGG	Bomo_Chr1	2013165	2013188
Bm_sgRNA_61886	GGTGTGAATGAACCCTCCCG	KWMTBOMO00067_exon_6	GGTGTGAATGAACCCTCCCGTGG	Bomo_Chr1	2013143	2013166
Bm_sgRNA_65974	GTGTCGAAGTTAGCCATCAA	KWMTBOMO00067_exon_6	GTGTCGAAGTTAGCCATCAACGG	Bomo_Chr1	2013075	2013098
Bm_sgRNA_40567	CTAGCTATTGCTCTGACCAG	KWMTBOMO00067_promoter	CTAGCTATTGCTCTGACCAGGGG	Bomo_Chr1	2048732	2048755
Bm_sgRNA_88365	TTCTAGCTATTGCTCTGACC	KWMTBOMO00067_promoter	TTCTAGCTATTGCTCTGACCAGG	Bomo_Chr1	2048730	2048753
Bm_sgRNA_73799	GGAACACTACATGCTGCTTG	KWMTBOMO00068	GGAACACTACATGCTGCTTGAGG	Bomo_Chr1	2055461	2055483
Bm_sgRNA_19185	ATAGAAAAATGGACGAGAGA	KWMTBOMO00068_exon_1	ATAGAAAAATGGACGAGAGACGG	Bomo_Chr1	2052314	2052337
Bm_sgRNA_52092	GCACAGAAGACATAGAAAAA	KWMTBOMO00068_exon_1	GCACAGAAGACATAGAAAAATGG	Bomo_Chr1	2052303	2052326
Bm_sgRNA_26997	CACATGATCCTGTGATCAGT	KWMTBOMO00068_exon_2	CACATGATCCTGTGATCAGTCGG	Bomo_Chr1	2054700	2054723
Bm_sgRNA_35732	CGACTGATCACAGGATCATG	KWMTBOMO00068_exon_2	CGACTGATCACAGGATCATGTGG	Bomo_Chr1	2054699	2054722
Bm_sgRNA_43990	CTTCAGGCTGAAATGGTTGC	KWMTBOMO00068_exon_2	CTTCAGGCTGAAATGGTTGCTGG	Bomo_Chr1	2054759	2054782
Bm_sgRNA_65683	GTGGCTAACCGACTGATCAC	KWMTBOMO00068_exon_2	GTGGCTAACCGACTGATCACAGG	Bomo_Chr1	2054708	2054731
Bm_sgRNA_16844	AGGTTGGCAATGTTGGCATT	KWMTBOMO00068_promoter	AGGTTGGCAATGTTGGCATTTGG	Bomo_Chr1	2052167	2052190
Bm_sgRNA_82706	TGGCAATGTTGGCATTTGGT	KWMTBOMO00068_promoter	TGGCAATGTTGGCATTTGGTTGG	Bomo_Chr1	2052163	2052186
Bm_sgRNA_08374	ACAGAGCGAAGCGGTATTTC	KWMTBOMO00069_exon_1	ACAGAGCGAAGCGGTATTTCAGG	Bomo_Chr1	2084403	2084426
Bm_sgRNA_49874	GAGTCCTCAACAGAGCGAAG	KWMTBOMO00069_exon_1	GAGTCCTCAACAGAGCGAAGCGG	Bomo_Chr1	2084412	2084435
Bm_sgRNA_54301	GCGAAGCGGTATTTCAGGCC	KWMTBOMO00069_exon_1	GCGAAGCGGTATTTCAGGCCTGG	Bomo_Chr1	2084398	2084421
Bm_sgRNA_61359	GGTCGATAGTCCTGCTCTCG	KWMTBOMO00069_exon_1	GGTCGATAGTCCTGCTCTCGCGG	Bomo_Chr1	2084249	2084272
Bm_sgRNA_53206	GCCAAGAACCCAAAGTACGG	KWMTBOMO00069_promoter	GCCAAGAACCCAAAGTACGGAGG	Bomo_Chr1	2084739	2084762
Bm_sgRNA_87370	TTCATACTCTAACAAGAAGA	KWMTBOMO00069_promoter	TTCATACTCTAACAAGAAGAAGG	Bomo_Chr1	2084568	2084591
Bm_sgRNA_14189	AGATATGCGAAACGGGACGG	KWMTBOMO00070_exon_1	AGATATGCGAAACGGGACGGAGG	Bomo_Chr1	2115011	2115034
Bm_sgRNA_43711	CTTACATGAATGTCTATTAC	KWMTBOMO00070_exon_1	CTTACATGAATGTCTATTACCGG	Bomo_Chr1	2114987	2115010
Bm_sgRNA_70025	TACCTCGAAGCGGAGTTGAG	KWMTBOMO00070_exon_1	TACCTCGAAGCGGAGTTGAGTGG	Bomo_Chr1	2115052	2115075
Bm_sgRNA_81111	TGCAGATATGCGAAACGGGA	KWMTBOMO00070_exon_1	TGCAGATATGCGAAACGGGACGG	Bomo_Chr1	2115014	2115037
Bm_sgRNA_29099	CAGTCCGTAGCCCCCACGTG	KWMTBOMO00070_exon_2	CAGTCCGTAGCCCCCACGTGGGG	Bomo_Chr1	2113796	2113819
Bm_sgRNA_47651	GACAGTCCGTAGCCCCCACG	KWMTBOMO00070_exon_2	GACAGTCCGTAGCCCCCACGTGG	Bomo_Chr1	2113794	2113817
Bm_sgRNA_48602	GACTGTCGAGGCGGTTTACC	KWMTBOMO00070_exon_2	GACTGTCGAGGCGGTTTACCCGG	Bomo_Chr1	2113778	2113801
Bm_sgRNA_61693	GGTGCTACGTCTAGTCTACA	KWMTBOMO00070_promoter	GGTGCTACGTCTAGTCTACACGG	Bomo_Chr1	2115141	2115164
Bm_sgRNA_73528	TCAAGCGCGCATTAGAATAT	KWMTBOMO00070_promoter	TCAAGCGCGCATTAGAATATCGG	Bomo_Chr1	2115172	2115195
Bm_sgRNA_02178	AAATGACCTCGTTGGACACG	KWMTBOMO00071_exon_3	AAATGACCTCGTTGGACACGCGG	KWMTBOMO00071_exon_3	536	559
Bm_sgRNA_11565	ACTCAAGACATCCTTGATTA	KWMTBOMO00071_exon_3	ACTCAAGACATCCTTGATTAAGG	KWMTBOMO00071_exon_3	913	936
Bm_sgRNA_12446	ACTTCATCCGGCACGAAGAC	KWMTBOMO00071_exon_3	ACTTCATCCGGCACGAAGACTGG	KWMTBOMO00071_exon_3	795	818
Bm_sgRNA_17591	AGTGACTCCAAATTGGGATG	KWMTBOMO00071_exon_3	AGTGACTCCAAATTGGGATGAGG	KWMTBOMO00071_exon_3	893	916
Bm_sgRNA_31868	CCAGTGCCTGTTATTGAACA	KWMTBOMO00071_exon_3	CCAGTGCCTGTTATTGAACATGG	KWMTBOMO00071_exon_3	699	722
Bm_sgRNA_37184	CGCGGCATCTCTTCATTCTC	KWMTBOMO00071_exon_3	CGCGGCATCTCTTCATTCTCAGG	KWMTBOMO00071_exon_3	373	396
Bm_sgRNA_38872	CGTATTCCGCGTGTCCAACG	KWMTBOMO00071_exon_3	CGTATTCCGCGTGTCCAACGAGG	KWMTBOMO00071_exon_3	530	553
Bm_sgRNA_40188	CTACAACAAACAAAATGATA	KWMTBOMO00071_exon_3	CTACAACAAACAAAATGATAAGG	KWMTBOMO00071_exon_3	475	498
Bm_sgRNA_46474	GAAGAGCACACAAGACTGGC	KWMTBOMO00071_exon_3	GAAGAGCACACAAGACTGGCTGG	KWMTBOMO00071_exon_3	757	780
Bm_sgRNA_49082	GAGCACACAAGACTGGCTGG	KWMTBOMO00071_exon_3	GAGCACACAAGACTGGCTGGCGG	KWMTBOMO00071_exon_3	760	783
Bm_sgRNA_49376	GAGCTGGCGCCGAATCTTGT	KWMTBOMO00071_exon_3	GAGCTGGCGCCGAATCTTGTTGG	KWMTBOMO00071_exon_3	727	750
Bm_sgRNA_49705	GAGGTACATTTTTGTGAGAA	KWMTBOMO00071_exon_3	GAGGTACATTTTTGTGAGAAAGG	KWMTBOMO00071_exon_3	608	631
Bm_sgRNA_49978	GAGTGTTAAATGAAGACTTA	KWMTBOMO00071_exon_3	GAGTGTTAAATGAAGACTTAGGG	KWMTBOMO00071_exon_3	297	320
Bm_sgRNA_64732	GTCTTCATTGTATCGTTTGA	KWMTBOMO00071_exon_3	GTCTTCATTGTATCGTTTGATGG	KWMTBOMO00071_exon_3	120	143
Bm_sgRNA_68700	TAACGGATTCAAATCTGGAC	KWMTBOMO00071_exon_3	TAACGGATTCAAATCTGGACTGG	KWMTBOMO00071_exon_3	825	848
Bm_sgRNA_69243	TAATCTAACGGATTCAAATC	KWMTBOMO00071_exon_3	TAATCTAACGGATTCAAATCTGG	KWMTBOMO00071_exon_3	830	853
Bm_sgRNA_72325	TATGAGAAACAGGTTCCACA	KWMTBOMO00071_exon_3	TATGAGAAACAGGTTCCACAAGG	KWMTBOMO00071_exon_3	676	699
Bm_sgRNA_77390	TCGTTTGAATGCTCGTCTAA	KWMTBOMO00071_exon_3	TCGTTTGAATGCTCGTCTAATGG	KWMTBOMO00071_exon_3	349	372
Bm_sgRNA_85889	TTACAAGATATGGCAACACT	KWMTBOMO00071_exon_3	TTACAAGATATGGCAACACTTGG	KWMTBOMO00071_exon_3	850	873
Bm_sgRNA_88814	TTGAACATGGTATGAGAAAC	KWMTBOMO00071_exon_3	TTGAACATGGTATGAGAAACAGG	KWMTBOMO00071_exon_3	686	709
Bm_sgRNA_19027	ATACGCGACGTTCGACCATA	KWMTBOMO00072_exon_1	ATACGCGACGTTCGACCATATGG	KWMTBOMO00072_exon_1	13	36
Bm_sgRNA_23717	ATTGAAAAGTCGTTTACGGC	KWMTBOMO00072_exon_1	ATTGAAAAGTCGTTTACGGCAGG	KWMTBOMO00072_exon_1	126	149
Bm_sgRNA_63940	GTCCCGGGGACGCCCCCCCC	KWMTBOMO00072_exon_1	GTCCCGGGGACGCCCCCCCCGGG	KWMTBOMO00072_exon_1	1473	1496
Bm_sgRNA_78742	TCTTCCATCGTAGTTTTGCC	KWMTBOMO00072_exon_1	TCTTCCATCGTAGTTTTGCCCGG	KWMTBOMO00072_exon_1	1455	1478
Bm_sgRNA_44489	CTTGACCTCGGAAGTGGTAA	KWMTBOMO00072_exon_2	CTTGACCTCGGAAGTGGTAATGG	KWMTBOMO00072_exon_2	1458	1481
Bm_sgRNA_50028	GAGTTGAATCCGGGCCGCAA	KWMTBOMO00072_exon_2	GAGTTGAATCCGGGCCGCAAGGG	KWMTBOMO00072_exon_2	2018	2041
Bm_sgRNA_63305	GTATCTGGTTCGCGGTTGAG	KWMTBOMO00072_exon_2	GTATCTGGTTCGCGGTTGAGTGG	KWMTBOMO00072_exon_2	2104	2127
Bm_sgRNA_36200	CGATCAAAAATGAACTCATA	KWMTBOMO00073_exon_1	CGATCAAAAATGAACTCATACGG	Bomo_Chr1	2190587	2190610
Bm_sgRNA_37145	CGCGCTGACCCGTAAAGTGG	KWMTBOMO00073_exon_1	CGCGCTGACCCGTAAAGTGGAGG	Bomo_Chr1	2190244	2190267
Bm_sgRNA_63682	GTCAGCGCGTCAATGGTGCT	KWMTBOMO00073_exon_1	GTCAGCGCGTCAATGGTGCTTGG	Bomo_Chr1	2190258	2190281
Bm_sgRNA_79933	TGACGCGCTGACCCGTAAAG	KWMTBOMO00073_exon_1	TGACGCGCTGACCCGTAAAGTGG	Bomo_Chr1	2190247	2190270
Bm_sgRNA_90543	TTTACGGGTCAGCGCGTCAA	KWMTBOMO00073_exon_1	TTTACGGGTCAGCGCGTCAATGG	Bomo_Chr1	2190251	2190274
Bm_sgRNA_17347	AGTCCTAAGTCCAGTGTAAG	KWMTBOMO00073_exon_2	AGTCCTAAGTCCAGTGTAAGAGG	Bomo_Chr1	2189809	2189832
Bm_sgRNA_38491	CGGTGACCTGCCTCTTACAC	KWMTBOMO00073_exon_2	CGGTGACCTGCCTCTTACACTGG	Bomo_Chr1	2189819	2189842
Bm_sgRNA_83722	TGTAAGAGGCAGGTCACCGT	KWMTBOMO00073_exon_2	TGTAAGAGGCAGGTCACCGTAGG	Bomo_Chr1	2189823	2189846
Bm_sgRNA_09548	ACCCCCAACGGGCACTTCAG	KWMTBOMO00074_exon_2	ACCCCCAACGGGCACTTCAGAGG	KWMTBOMO00074_exon_2	152	175
Bm_sgRNA_09623	ACCCGTGTCCCAGATATCGA	KWMTBOMO00074_exon_2	ACCCGTGTCCCAGATATCGAGGG	KWMTBOMO00074_exon_2	486	509
Bm_sgRNA_14437	AGATTCGGCTACGGCCCCCG	KWMTBOMO00074_exon_2	AGATTCGGCTACGGCCCCCGTGG	KWMTBOMO00074_exon_2	742	765
Bm_sgRNA_16695	AGGTCCCACAGCAGTGATGC	KWMTBOMO00074_exon_2	AGGTCCCACAGCAGTGATGCAGG	KWMTBOMO00074_exon_2	705	728
Bm_sgRNA_63065	GTAGGCCAAGGCGAAATCGT	KWMTBOMO00074_exon_2	GTAGGCCAAGGCGAAATCGTAGG	KWMTBOMO00074_exon_2	536	559
Bm_sgRNA_82081	TGCTGATCCTGACGTCTGTG	KWMTBOMO00074_exon_2	TGCTGATCCTGACGTCTGTGCGG	KWMTBOMO00074_exon_2	223	246
Bm_sgRNA_83022	TGGCTGCGCGTAGACCACGG	KWMTBOMO00074_exon_2	TGGCTGCGCGTAGACCACGGGGG	KWMTBOMO00074_exon_2	756	779
Bm_sgRNA_44489	CTTGACCTCGGAAGTGGTAA	KWMTBOMO00075_exon_1	CTTGACCTCGGAAGTGGTAATGG	Bomo_Chr1	2239574	2239597
Bm_sgRNA_50028	GAGTTGAATCCGGGCCGCAA	KWMTBOMO00075_exon_1	GAGTTGAATCCGGGCCGCAAGGG	Bomo_Chr1	2239014	2239037
Bm_sgRNA_67674	GTTTCGGGCGTCGCTTAAGC	KWMTBOMO00075_exon_1	GTTTCGGGCGTCGCTTAAGCGGG	Bomo_Chr1	2239268	2239291
Bm_sgRNA_07367	AATTTGGACGACAATCCAGT	KWMTBOMO00076_exon_1	AATTTGGACGACAATCCAGTTGG	Bomo_Chr1	2275272	2275295
Bm_sgRNA_07642	ACAACCGCAGTAGAGATTTG	KWMTBOMO00076_exon_1	ACAACCGCAGTAGAGATTTGTGG	Bomo_Chr1	2275880	2275903
Bm_sgRNA_09317	ACCAGACGGGCAGATGCCCT	KWMTBOMO00076_exon_1	ACCAGACGGGCAGATGCCCTCGG	Bomo_Chr1	2275450	2275473
Bm_sgRNA_09864	ACCGGGTGGAGATTTGGCGA	KWMTBOMO00076_exon_1	ACCGGGTGGAGATTTGGCGAAGG	Bomo_Chr1	2276446	2276469
Bm_sgRNA_12204	ACTGGTGCGTAGGTCACTAG	KWMTBOMO00076_exon_1	ACTGGTGCGTAGGTCACTAGTGG	Bomo_Chr1	2276159	2276182
Bm_sgRNA_17114	AGTAGTGGATGAGGTACGCA	KWMTBOMO00076_exon_1	AGTAGTGGATGAGGTACGCACGG	Bomo_Chr1	2275576	2275599
Bm_sgRNA_35645	CGACGGAGAGACGTTCCATA	KWMTBOMO00076_exon_1	CGACGGAGAGACGTTCCATAAGG	Bomo_Chr1	2275813	2275836
Bm_sgRNA_38503	CGGTGCCGCCACCGAACGAA	KWMTBOMO00076_exon_1	CGGTGCCGCCACCGAACGAATGG	Bomo_Chr1	2275771	2275794
Bm_sgRNA_43235	CTGGTGCCCGACAGGATTCA	KWMTBOMO00076_exon_1	CTGGTGCCCGACAGGATTCAAGG	Bomo_Chr1	2276392	2276415
Bm_sgRNA_49928	GAGTGCATATCTATCCACGC	KWMTBOMO00076_exon_1	GAGTGCATATCTATCCACGCGGG	Bomo_Chr1	2275364	2275387
Bm_sgRNA_53578	GCCCGACAGGATTCAAGGTG	KWMTBOMO00076_exon_1	GCCCGACAGGATTCAAGGTGGGG	Bomo_Chr1	2276397	2276420
Bm_sgRNA_80104	TGAGAAAACGCTGCTCCAAC	KWMTBOMO00076_exon_1	TGAGAAAACGCTGCTCCAACTGG	Bomo_Chr1	2275287	2275310
Bm_sgRNA_01324	AAAGAAGGGACCGCCACGTC	KWMTBOMO00077_exon_1	AAAGAAGGGACCGCCACGTCTGG	Bomo_Chr1	2287769	2287792
Bm_sgRNA_08060	ACACCAGGTACGCATTCTTC	KWMTBOMO00077_exon_1	ACACCAGGTACGCATTCTTCAGG	Bomo_Chr1	2287352	2287375
Bm_sgRNA_50615	GATCGACGGTTCTTTAGTAG	KWMTBOMO00077_exon_1	GATCGACGGTTCTTTAGTAGAGG	Bomo_Chr1	2284533	2284556
Bm_sgRNA_70689	TAGAGAAGAAAGACGTCTAG	KWMTBOMO00077_exon_1	TAGAGAAGAAAGACGTCTAGCGG	Bomo_Chr1	2283688	2283711
Bm_sgRNA_78648	TCTTACCCTCTGGTAATGGT	KWMTBOMO00077_exon_1	TCTTACCCTCTGGTAATGGTAGG	Bomo_Chr1	2286826	2286849
Bm_sgRNA_89783	TTGGGCATACCTCTTCCAGA	KWMTBOMO00077_exon_1	TTGGGCATACCTCTTCCAGAAGG	Bomo_Chr1	2284067	2284090
Bm_sgRNA_89860	TTGGTCTTACCCTCTGGTAA	KWMTBOMO00077_exon_1	TTGGTCTTACCCTCTGGTAATGG	Bomo_Chr1	2286830	2286853
Bm_sgRNA_28209	CAGATGAACACACAAGAAGA	KWMTBOMO00077_promoter	CAGATGAACACACAAGAAGAAGG	Bomo_Chr1	2283551	2283574
Bm_sgRNA_46715	GAAGCTTGCTTACCTAACAA	KWMTBOMO00078_exon_2	GAAGCTTGCTTACCTAACAAAGG	Bomo_Chr1	2291318	2291341
Bm_sgRNA_61186	GGTATTTTGCAGTGTCTAAC	KWMTBOMO00078_exon_2	GGTATTTTGCAGTGTCTAACCGG	Bomo_Chr1	2291363	2291386
Bm_sgRNA_67499	GTTGTTCTCCACCGGTTTCA	KWMTBOMO00078_exon_2	GTTGTTCTCCACCGGTTTCAAGG	Bomo_Chr1	2291559	2291582
Bm_sgRNA_76174	TCGAAGCCAATGAAGTCTAC	KWMTBOMO00078_exon_2	TCGAAGCCAATGAAGTCTACTGG	Bomo_Chr1	2291531	2291554
Bm_sgRNA_83545	TGGTGTAGGTTGTTCTCCAC	KWMTBOMO00078_exon_2	TGGTGTAGGTTGTTCTCCACCGG	Bomo_Chr1	2291551	2291574
Bm_sgRNA_89269	TTGCAGTGTCTAACCGGAGT	KWMTBOMO00078_exon_2	TTGCAGTGTCTAACCGGAGTCGG	Bomo_Chr1	2291357	2291380
Bm_sgRNA_11867	ACTGAAACACAACGAGCACG	KWMTBOMO00078_promoter	ACTGAAACACAACGAGCACGAGG	Bomo_Chr1	2289977	2290000
Bm_sgRNA_43597	CTGTTGTCCTCCTAAGAGAT	KWMTBOMO00078_promoter	CTGTTGTCCTCCTAAGAGATTGG	Bomo_Chr1	2290024	2290047
Bm_sgRNA_87956	TTCGATTCCAATCTCTTAGG	KWMTBOMO00078_promoter	TTCGATTCCAATCTCTTAGGAGG	Bomo_Chr1	2290031	2290054
Bm_sgRNA_08692	ACAGTCAAAACCTTCAACAC	KWMTBOMO00079_exon_2	ACAGTCAAAACCTTCAACACCGG	Bomo_Chr1	2295352	2295375
Bm_sgRNA_40974	CTCAAGAAGGAAGAAACCTC	KWMTBOMO00079_exon_2	CTCAAGAAGGAAGAAACCTCTGG	Bomo_Chr1	2295277	2295300
Bm_sgRNA_42649	CTGCCAAGTTCTAGTAACCG	KWMTBOMO00079_exon_2	CTGCCAAGTTCTAGTAACCGTGG	Bomo_Chr1	2295248	2295271
Bm_sgRNA_46850	GAAGGTTTTGACTGTTCAGC	KWMTBOMO00079_exon_2	GAAGGTTTTGACTGTTCAGCTGG	Bomo_Chr1	2295344	2295367
Bm_sgRNA_62234	GGTTTTGACTGTTCAGCTGG	KWMTBOMO00079_exon_2	GGTTTTGACTGTTCAGCTGGTGG	Bomo_Chr1	2295341	2295364
Bm_sgRNA_80066	TGACTGTTCAGCTGGTGGAT	KWMTBOMO00079_exon_2	TGACTGTTCAGCTGGTGGATTGG	Bomo_Chr1	2295336	2295359
Bm_sgRNA_20785	ATCGATGATCTGCGGGCCCT	KWMTBOMO00080_exon_5	ATCGATGATCTGCGGGCCCTGGG	Bomo_Chr1	2358168	2358191
Bm_sgRNA_45009	CTTTCGTTATCGATGATCTG	KWMTBOMO00080_exon_5	CTTTCGTTATCGATGATCTGCGG	Bomo_Chr1	2358160	2358183
Bm_sgRNA_55440	GCTAATATGGTCTATAGATC	KWMTBOMO00080_exon_5	GCTAATATGGTCTATAGATCCGG	Bomo_Chr1	2358220	2358243
Bm_sgRNA_57177	GGAACAACGTGCTGCATCTG	KWMTBOMO00080_exon_5	GGAACAACGTGCTGCATCTGTGG	Bomo_Chr1	2358136	2358159
Bm_sgRNA_72079	TATCGATGATCTGCGGGCCC	KWMTBOMO00080_exon_5	TATCGATGATCTGCGGGCCCTGG	Bomo_Chr1	2358167	2358190
Bm_sgRNA_92759	TTTTTCGGCAAATTTTGTGC	KWMTBOMO00080_exon_5	TTTTTCGGCAAATTTTGTGCCGG	Bomo_Chr1	2358201	2358224
Bm_sgRNA_79879	TGACCTTACTCGAATACGTT	KWMTBOMO00081_promoter	TGACCTTACTCGAATACGTTGGG	Bomo_Chr15	14383083	14383106
Bm_sgRNA_16839	AGGTTGCATGGCGCGTGCGA	KWMTBOMO00083_exon_1	AGGTTGCATGGCGCGTGCGACGG	Bomo_Chr1	2477237	2477260
Bm_sgRNA_60976	GGTACCGTTATAACACTCGC	KWMTBOMO00083_exon_1	GGTACCGTTATAACACTCGCGGG	Bomo_Chr1	2477206	2477229
Bm_sgRNA_83343	TGGTACCGTTATAACACTCG	KWMTBOMO00083_exon_1	TGGTACCGTTATAACACTCGCGG	Bomo_Chr1	2477205	2477228
Bm_sgRNA_12078	ACTGCTCGGTCCCTCTAGGA	KWMTBOMO00083_exon_2	ACTGCTCGGTCCCTCTAGGAGGG	Bomo_Chr1	2454281	2454304
Bm_sgRNA_20112	ATCACATTCGTACCAGGCAG	KWMTBOMO00083_exon_2	ATCACATTCGTACCAGGCAGAGG	Bomo_Chr1	2454315	2454338
Bm_sgRNA_54222	GCCTTCTGTCAGGCTGTCGT	KWMTBOMO00083_exon_2	GCCTTCTGTCAGGCTGTCGTTGG	Bomo_Chr1	2454339	2454362
Bm_sgRNA_76861	TCGGCAGCTTGTAACTTCCC	KWMTBOMO00083_exon_2	TCGGCAGCTTGTAACTTCCCGGG	Bomo_Chr1	2454391	2454414
Bm_sgRNA_78007	TCTCGTACACACCCTCCTAG	KWMTBOMO00083_exon_2	TCTCGTACACACCCTCCTAGAGG	Bomo_Chr1	2454270	2454293
Bm_sgRNA_82471	TGGAGAACGTCACGTGGCAA	KWMTBOMO00083_exon_2	TGGAGAACGTCACGTGGCAATGG	Bomo_Chr1	2454359	2454382
Bm_sgRNA_05691	AATAGACAGGACTGGCGATT	KWMTBOMO00084_exon_1	AATAGACAGGACTGGCGATTCGG	Bomo_Chr1	2483834	2483857
Bm_sgRNA_12082	ACTGCTCTTACTTATTTCTT	KWMTBOMO00084_exon_1	ACTGCTCTTACTTATTTCTTCGG	Bomo_Chr1	2483801	2483824
Bm_sgRNA_30727	CATTGTTTCGAACAATTTTC	KWMTBOMO00084_exon_1	CATTGTTTCGAACAATTTTCGGG	Bomo_Chr1	2483772	2483795
Bm_sgRNA_45303	GAAAAAAAAATAGACAGGAC	KWMTBOMO00084_exon_1	GAAAAAAAAATAGACAGGACTGG	Bomo_Chr1	2483826	2483849
Bm_sgRNA_46213	GAACTATTTTTACAAAAACG	KWMTBOMO00084_exon_1	GAACTATTTTTACAAAAACGAGG	Bomo_Chr1	2483870	2483893
Bm_sgRNA_56032	GCTCTTACTTATTTCTTCGG	KWMTBOMO00084_exon_1	GCTCTTACTTATTTCTTCGGAGG	Bomo_Chr1	2483804	2483827
Bm_sgRNA_16168	AGGCAAAGTGTTTTTAGCCA	KWMTBOMO00084_promoter	AGGCAAAGTGTTTTTAGCCAAGG	Bomo_Chr1	2483363	2483386
Bm_sgRNA_30746	CATTTAGAATTATATCTATC	KWMTBOMO00084_promoter	CATTTAGAATTATATCTATCAGG	Bomo_Chr1	2483494	2483517
Bm_sgRNA_31388	CCACCTGGCCAACCGGGGGT	KWMTBOMO00086_exon_1	CCACCTGGCCAACCGGGGGTGGG	Bomo_Chr1	2531413	2531436
Bm_sgRNA_32082	CCATGTACTCTCGTGAATAA	KWMTBOMO00086_exon_1	CCATGTACTCTCGTGAATAAGGG	Bomo_Chr1	2531663	2531686
Bm_sgRNA_32253	CCCACCCCCGGTTGGCCAGG	KWMTBOMO00086_exon_1	CCCACCCCCGGTTGGCCAGGTGG	Bomo_Chr1	2531413	2531436
Bm_sgRNA_38590	CGGTTCTGTCACCCCACCCC	KWMTBOMO00086_exon_1	CGGTTCTGTCACCCCACCCCCGG	Bomo_Chr1	2531401	2531424
Bm_sgRNA_51727	GCAAAGGTGGTAATATGCGG	KWMTBOMO00086_exon_1	GCAAAGGTGGTAATATGCGGCGG	Bomo_Chr1	2531463	2531486
Bm_sgRNA_55162	GCGTACCACCTGGCCAACCG	KWMTBOMO00086_exon_1	GCGTACCACCTGGCCAACCGGGG	Bomo_Chr1	2531418	2531441
Bm_sgRNA_59575	GGCGGCTGTCGCGTACCACC	KWMTBOMO00086_exon_1	GGCGGCTGTCGCGTACCACCTGG	Bomo_Chr1	2531428	2531451
Bm_sgRNA_75313	TCCATGTACTCTCGTGAATA	KWMTBOMO00086_exon_1	TCCATGTACTCTCGTGAATAAGG	Bomo_Chr1	2531664	2531687
Bm_sgRNA_06274	AATCTATAAAAACCTCTGAC	KWMTBOMO00086_promoter	AATCTATAAAAACCTCTGACTGG	Bomo_Chr1	2532104	2532127
Bm_sgRNA_22462	ATGGTGTACTATTTCTACCA	KWMTBOMO00086_promoter	ATGGTGTACTATTTCTACCAAGG	Bomo_Chr1	2532147	2532170
Bm_sgRNA_43166	CTGGGTGTCTTTGGAGGCTC	KWMTBOMO00086_promoter	CTGGGTGTCTTTGGAGGCTCAGG	Bomo_Chr1	2532206	2532229
Bm_sgRNA_43443	CTGTGATATTGATTATCCGA	KWMTBOMO00086_promoter	CTGTGATATTGATTATCCGAAGG	Bomo_Chr1	2531799	2531822
Bm_sgRNA_55733	GCTCAGGCGGAGGCTTATCG	KWMTBOMO00086_promoter	GCTCAGGCGGAGGCTTATCGAGG	Bomo_Chr1	2532190	2532213
Bm_sgRNA_61883	GGTGTCTTTGGAGGCTCAGG	KWMTBOMO00086_promoter	GGTGTCTTTGGAGGCTCAGGCGG	Bomo_Chr1	2532203	2532226
Bm_sgRNA_64795	GTCTTTGGAGGCTCAGGCGG	KWMTBOMO00086_promoter	GTCTTTGGAGGCTCAGGCGGAGG	Bomo_Chr1	2532200	2532223
Bm_sgRNA_77639	TCTATAAAAACCTCTGACTG	KWMTBOMO00086_promoter	TCTATAAAAACCTCTGACTGGGG	Bomo_Chr1	2532102	2532125
Bm_sgRNA_80833	TGATTAACTTCCCCAGTCAG	KWMTBOMO00086_promoter	TGATTAACTTCCCCAGTCAGAGG	Bomo_Chr1	2532092	2532115
Bm_sgRNA_89980	TTGTATAAATAACTTCGTTA	KWMTBOMO00086_promoter	TTGTATAAATAACTTCGTTATGG	Bomo_Chr1	2532166	2532189
Bm_sgRNA_49345	GAGCTCATTCCATAGCCGGA	KWMTBOMO00087_promoter	GAGCTCATTCCATAGCCGGATGG	Bomo_Chr1	2534928	2534951
Bm_sgRNA_28440	CAGCCGGGTGTTTTTGATGG	KWMTBOMO00089_exon_1	CAGCCGGGTGTTTTTGATGGTGG	Bomo_Chr1	2564970	2564993
Bm_sgRNA_31905	CCAGTTGGGACGCTCATCGC	KWMTBOMO00089_exon_1	CCAGTTGGGACGCTCATCGCGGG	Bomo_Chr1	2564905	2564928
Bm_sgRNA_32611	CCCGCGATGAGCGTCCCAAC	KWMTBOMO00089_exon_1	CCCGCGATGAGCGTCCCAACTGG	Bomo_Chr1	2564905	2564928
Bm_sgRNA_57015	GCTTTTAACTCATCGCTCAC	KWMTBOMO00089_exon_1	GCTTTTAACTCATCGCTCACTGG	Bomo_Chr1	2564797	2564820
Bm_sgRNA_63911	GTCCCAACTGGCAACGAGAC	KWMTBOMO00089_exon_1	GTCCCAACTGGCAACGAGACTGG	Bomo_Chr1	2564917	2564940
Bm_sgRNA_45480	GAAACAGTCCAACACCGTGA	KWMTBOMO00089_promoter	GAAACAGTCCAACACCGTGAAGG	Bomo_Chr1	2565149	2565172
Bm_sgRNA_04133	AAGAGAGTCCAGTGCTGGGC	KWMTBOMO00090_exon_1	AAGAGAGTCCAGTGCTGGGCAGG	Bomo_Chr1	2572604	2572627
Bm_sgRNA_16196	AGGCAGCCCGATACCAGGCC	KWMTBOMO00090_exon_1	AGGCAGCCCGATACCAGGCCGGG	Bomo_Chr1	2572647	2572670
Bm_sgRNA_53755	GCCGCAAGAGAGTCCAGTGC	KWMTBOMO00090_exon_1	GCCGCAAGAGAGTCCAGTGCTGG	Bomo_Chr1	2572599	2572622
Bm_sgRNA_03314	AACGCGATGCAGTTCGCCAA	KWMTBOMO00090_exon_2	AACGCGATGCAGTTCGCCAAGGG	Bomo_Chr1	2577784	2577807
Bm_sgRNA_11717	ACTCGAGCCGTGGAGCGAGC	KWMTBOMO00090_exon_2	ACTCGAGCCGTGGAGCGAGCCGG	Bomo_Chr1	2577812	2577835
Bm_sgRNA_29271	CAGTTCGCCAAGGGCATATC	KWMTBOMO00090_exon_2	CAGTTCGCCAAGGGCATATCCGG	Bomo_Chr1	2577793	2577816
Bm_sgRNA_14879	AGCCAAATTAAAGTACGGCG	KWMTBOMO00091_exon_1	AGCCAAATTAAAGTACGGCGGGG	Bomo_Chr1	2657721	2657744
Bm_sgRNA_32786	CCCTGAGCCAAATTAAAGTA	KWMTBOMO00091_exon_1	CCCTGAGCCAAATTAAAGTACGG	Bomo_Chr1	2657716	2657739
Bm_sgRNA_39039	CGTCCTCGCGCCGAATGCGC	KWMTBOMO00091_exon_1	CGTCCTCGCGCCGAATGCGCGGG	Bomo_Chr1	2657824	2657847
Bm_sgRNA_47994	GACCGTAATAGAAATTGTTG	KWMTBOMO00091_exon_1	GACCGTAATAGAAATTGTTGAGG	Bomo_Chr1	2657971	2657994
Bm_sgRNA_53947	GCCGTACTTTAATTTGGCTC	KWMTBOMO00091_exon_1	GCCGTACTTTAATTTGGCTCAGG	Bomo_Chr1	2657717	2657740
Bm_sgRNA_70017	TACCTCAACAATTTCTATTA	KWMTBOMO00091_exon_1	TACCTCAACAATTTCTATTACGG	Bomo_Chr1	2657973	2657996
Bm_sgRNA_70243	TACGGTCGTAATATTTCAAT	KWMTBOMO00091_exon_1	TACGGTCGTAATATTTCAATCGG	Bomo_Chr1	2657955	2657978
Bm_sgRNA_70899	TAGCCGAGCGCCCGCGCATT	KWMTBOMO00091_exon_1	TAGCCGAGCGCCCGCGCATTCGG	Bomo_Chr1	2657834	2657857
Bm_sgRNA_77999	TCTCGGATCGAGTCACGTGG	KWMTBOMO00091_exon_1	TCTCGGATCGAGTCACGTGGAGG	Bomo_Chr1	2657750	2657773
Bm_sgRNA_32567	CCCGAGGATGTCATGTTACC	KWMTBOMO00093_exon_1	CCCGAGGATGTCATGTTACCAGG	Bomo_Chr1	2668153	2668176
Bm_sgRNA_13316	AGAATTATTACCAAACGCCG	KWMTBOMO00094_exon_1	AGAATTATTACCAAACGCCGAGG	Bomo_Chr1	2689068	2689091
Bm_sgRNA_29053	CAGTATCTTGAGCGTAGCCG	KWMTBOMO00094_exon_1	CAGTATCTTGAGCGTAGCCGTGG	Bomo_Chr1	2689042	2689065
Bm_sgRNA_55952	GCTCGTTTAGAGCCGACCCT	KWMTBOMO00094_exon_1	GCTCGTTTAGAGCCGACCCTCGG	Bomo_Chr1	2689085	2689108
Bm_sgRNA_70703	TAGAGCCGACCCTCGGCGTT	KWMTBOMO00094_exon_1	TAGAGCCGACCCTCGGCGTTTGG	Bomo_Chr1	2689078	2689101
Bm_sgRNA_75283	TCCATCGGATTTATAACAAG	KWMTBOMO00094_exon_1	TCCATCGGATTTATAACAAGAGG	Bomo_Chr1	2689107	2689130
Bm_sgRNA_89830	TTGGTAATAATTCTGAGCCA	KWMTBOMO00094_exon_1	TTGGTAATAATTCTGAGCCACGG	Bomo_Chr1	2689059	2689082
Bm_sgRNA_75852	TCCGTTGTCTCCACAGGTGT	KWMTBOMO00094_exon_2	TCCGTTGTCTCCACAGGTGTTGG	Bomo_Chr1	2694327	2694350
Bm_sgRNA_19464	ATAGTCTGCCAGTCGATGAT	KWMTBOMO00094_exon_20	ATAGTCTGCCAGTCGATGATAGG	Bomo_Chr1	2714748	2714771
Bm_sgRNA_67503	GTTGTTGAATGTTTTCGACC	KWMTBOMO00094_exon_20	GTTGTTGAATGTTTTCGACCCGG	Bomo_Chr1	2714726	2714749
Bm_sgRNA_77570	TCTAGAATAGTGGTTTCGCT	KWMTBOMO00094_exon_20	TCTAGAATAGTGGTTTCGCTGGG	Bomo_Chr1	2714637	2714660
Bm_sgRNA_76025	TCCTGGTTGACAGTAGTCAC	KWMTBOMO00094_exon_3	TCCTGGTTGACAGTAGTCACAGG	Bomo_Chr1	2694689	2694712
Bm_sgRNA_77891	TCTCCGACTGCCACCAAGTC	KWMTBOMO00094_exon_3	TCTCCGACTGCCACCAAGTCTGG	Bomo_Chr1	2694759	2694782
Bm_sgRNA_38845	CGTATGATATTACGTATGTC	KWMTBOMO00094_exon_4	CGTATGATATTACGTATGTCCGG	Bomo_Chr1	2694960	2694983
Bm_sgRNA_41385	CTCCGAGCGTTTCACAACAC	KWMTBOMO00094_promoter	CTCCGAGCGTTTCACAACACTGG	Bomo_Chr1	2688929	2688952
Bm_sgRNA_26849	CACAGAAATGGTGTCTCAGG	KWMTBOMO00095_exon_1	CACAGAAATGGTGTCTCAGGAGG	KWMTBOMO00095_exon_1	704	727
Bm_sgRNA_41610	CTCGATATGAAACTAGCGCC	KWMTBOMO00095_exon_1	CTCGATATGAAACTAGCGCCTGG	KWMTBOMO00095_exon_1	772	795
Bm_sgRNA_56638	GCTTAACATGCGCGGTTTCA	KWMTBOMO00095_exon_1	GCTTAACATGCGCGGTTTCAAGG	KWMTBOMO00095_exon_1	213	236
Bm_sgRNA_71882	TATCACAGAAATGGTGTCTC	KWMTBOMO00095_exon_1	TATCACAGAAATGGTGTCTCAGG	KWMTBOMO00095_exon_1	707	730
Bm_sgRNA_73993	TCACGTCGGCTTAACATGCG	KWMTBOMO00095_exon_1	TCACGTCGGCTTAACATGCGCGG	KWMTBOMO00095_exon_1	221	244
Bm_sgRNA_36428	CGATTGTGTGATCCGCTCGA	KWMTBOMO00095_promoter	CGATTGTGTGATCCGCTCGACGG	Bomo_Chr1	2743792	2743815
Bm_sgRNA_65049	GTGATCCGCTCGACGGACTG	KWMTBOMO00095_promoter	GTGATCCGCTCGACGGACTGCGG	Bomo_Chr1	2743785	2743808
Bm_sgRNA_15418	AGCGGGGTGTCCTAGGTGCG	KWMTBOMO00096_exon_1	AGCGGGGTGTCCTAGGTGCGCGG	Bomo_Chr1	2766544	2766567
Bm_sgRNA_25108	CAAACTCGGCGTCACACAAG	KWMTBOMO00096_exon_1	CAAACTCGGCGTCACACAAGCGG	Bomo_Chr1	2766444	2766467
Bm_sgRNA_38371	CGGGTCCCGTCTCTTGTTCT	KWMTBOMO00096_exon_1	CGGGTCCCGTCTCTTGTTCTTGG	Bomo_Chr1	2766265	2766288
Bm_sgRNA_76311	TCGAGCCACGCCTGCAGTAT	KWMTBOMO00096_exon_1	TCGAGCCACGCCTGCAGTATGGG	Bomo_Chr1	2766305	2766328
Bm_sgRNA_06205	AATCGCTCGTTTCGCGAATA	KWMTBOMO00096_promoter	AATCGCTCGTTTCGCGAATAGGG	Bomo_Chr1	2766874	2766897
Bm_sgRNA_26407	CAATCATTGAGGATTACGAT	KWMTBOMO00096_promoter	CAATCATTGAGGATTACGATAGG	Bomo_Chr1	2766797	2766820
Bm_sgRNA_52225	GCACGAGTTAATTCGGCGCA	KWMTBOMO00096_promoter	GCACGAGTTAATTCGGCGCACGG	Bomo_Chr1	2766841	2766864
Bm_sgRNA_43523	CTGTGTTGACAAAATAAGAA	KWMTBOMO00097_exon_1	CTGTGTTGACAAAATAAGAAAGG	Bomo_Chr1	2904366	2904389
Bm_sgRNA_71811	TATATTATTTTAGTGTTTCT	KWMTBOMO00097_exon_1	TATATTATTTTAGTGTTTCTTGG	Bomo_Chr1	2904484	2904507
Bm_sgRNA_92607	TTTTGTCAACACAGCAATGT	KWMTBOMO00097_exon_1	TTTTGTCAACACAGCAATGTAGG	Bomo_Chr1	2904357	2904380
Bm_sgRNA_17904	AGTGTTATTGAAGACAGCTG	KWMTBOMO00097_exon_2	AGTGTTATTGAAGACAGCTGCGG	Bomo_Chr1	2905288	2905311
Bm_sgRNA_58157	GGAGGCACATTGTCGATAAA	KWMTBOMO00097_exon_2	GGAGGCACATTGTCGATAAACGG	Bomo_Chr1	2905329	2905352
Bm_sgRNA_66123	GTGTTATTGAAGACAGCTGC	KWMTBOMO00097_exon_2	GTGTTATTGAAGACAGCTGCGGG	Bomo_Chr1	2905287	2905310
Bm_sgRNA_84996	TGTTATTGAAGACAGCTGCG	KWMTBOMO00097_exon_2	TGTTATTGAAGACAGCTGCGGGG	Bomo_Chr1	2905286	2905309
Bm_sgRNA_87126	TTCAATAACACTGCTGACAC	KWMTBOMO00097_exon_2	TTCAATAACACTGCTGACACAGG	Bomo_Chr1	2905299	2905322
Bm_sgRNA_88829	TTGAAGACAGCTGCGGGGCT	KWMTBOMO00097_exon_2	TTGAAGACAGCTGCGGGGCTCGG	Bomo_Chr1	2905281	2905304
Bm_sgRNA_89058	TTGAGTTGGTCTCCAATTCG	KWMTBOMO00097_exon_3	TTGAGTTGGTCTCCAATTCGGGG	Bomo_Chr1	2905553	2905576
Bm_sgRNA_45735	GAAATAGTGCGAAAATATGT	KWMTBOMO00097_promoter	GAAATAGTGCGAAAATATGTTGG	Bomo_Chr1	2904281	2904304
Bm_sgRNA_19782	ATATGTAACGAACGACTTCA	KWMTBOMO00098_exon_1	ATATGTAACGAACGACTTCAGGG	Bomo_Chr1	2926829	2926852
Bm_sgRNA_35830	CGAGACTTGGACATATGCAT	KWMTBOMO00098_exon_2	CGAGACTTGGACATATGCATCGG	Bomo_Chr1	2925397	2925420
Bm_sgRNA_44942	CTTTATGGGTGGAACGTTAT	KWMTBOMO00098_exon_2	CTTTATGGGTGGAACGTTATCGG	Bomo_Chr1	2925329	2925352
Bm_sgRNA_61094	GGTATAAAATCTTCGATCTG	KWMTBOMO00098_exon_2	GGTATAAAATCTTCGATCTGTGG	Bomo_Chr1	2925350	2925373
Bm_sgRNA_61271	GGTCATGCTGTTGTTCAAAA	KWMTBOMO00098_exon_2	GGTCATGCTGTTGTTCAAAACGG	Bomo_Chr1	2925371	2925394
Bm_sgRNA_63580	GTCAATTTTACGAAGACAGG	KWMTBOMO00098_exon_2	GTCAATTTTACGAAGACAGGAGG	Bomo_Chr1	2925422	2925445
Bm_sgRNA_87040	TTCAAAACGGCAGCGAGACT	KWMTBOMO00098_exon_2	TTCAAAACGGCAGCGAGACTTGG	Bomo_Chr1	2925384	2925407
Bm_sgRNA_01743	AAAGTCAGCACCGAGCTTAA	KWMTBOMO00098_exon_3	AAAGTCAGCACCGAGCTTAAAGG	Bomo_Chr1	2919664	2919687
Bm_sgRNA_25263	CAAAGTGACAATCGCAACGA	KWMTBOMO00098_exon_3	CAAAGTGACAATCGCAACGAGGG	Bomo_Chr1	2919623	2919646
Bm_sgRNA_35960	CGAGCTTAAAGGACACGAAC	KWMTBOMO00098_exon_3	CGAGCTTAAAGGACACGAACTGG	Bomo_Chr1	2919653	2919676
Bm_sgRNA_55923	GCTCGGTGCTGACTTTCGGC	KWMTBOMO00098_exon_3	GCTCGGTGCTGACTTTCGGCAGG	Bomo_Chr1	2919671	2919694
Bm_sgRNA_85684	TTAAGCTCGGTGCTGACTTT	KWMTBOMO00098_exon_3	TTAAGCTCGGTGCTGACTTTCGG	Bomo_Chr1	2919667	2919690
Bm_sgRNA_15388	AGCGGCCGATAATTCATTCA	KWMTBOMO00098_promoter	AGCGGCCGATAATTCATTCAAGG	Bomo_Chr1	2926920	2926943
Bm_sgRNA_70291	TACGTCTACAAATTTGACAG	KWMTBOMO00098_promoter	TACGTCTACAAATTTGACAGCGG	Bomo_Chr1	2926902	2926925
Bm_sgRNA_45930	GAACACGGCGCTGCTTCAGC	KWMTBOMO00099_exon_2	GAACACGGCGCTGCTTCAGCTGG	Bomo_Chr1	2971938	2971961
Bm_sgRNA_56514	GCTGTATTCTTGAAATGCTC	KWMTBOMO00099_exon_2	GCTGTATTCTTGAAATGCTCCGG	Bomo_Chr1	2972068	2972091
Bm_sgRNA_60106	GGGAGAGCCTTGATACAAGG	KWMTBOMO00099_exon_2	GGGAGAGCCTTGATACAAGGCGG	Bomo_Chr1	2971993	2972016
Bm_sgRNA_70164	TACGCCTGCCTGTCCGACTC	KWMTBOMO00099_exon_2	TACGCCTGCCTGTCCGACTCCGG	Bomo_Chr1	2972014	2972037
Bm_sgRNA_13556	AGACGAGGAAGGTCGGGGCA	KWMTBOMO00099_exon_3	AGACGAGGAAGGTCGGGGCAGGG	Bomo_Chr1	2980192	2980215
Bm_sgRNA_48689	GACTTTCGAGGCCTATGCAG	KWMTBOMO00099_exon_3	GACTTTCGAGGCCTATGCAGAGG	Bomo_Chr1	2980137	2980160
Bm_sgRNA_49571	GAGGCCTATGCAGAGGAAGC	KWMTBOMO00099_exon_3	GAGGCCTATGCAGAGGAAGCTGG	Bomo_Chr1	2980144	2980167
Bm_sgRNA_51825	GCAACGGGAATCGACTTTCG	KWMTBOMO00099_exon_3	GCAACGGGAATCGACTTTCGAGG	Bomo_Chr1	2980125	2980148
Bm_sgRNA_85054	TGTTCGATAACAGACGAGGA	KWMTBOMO00099_exon_3	TGTTCGATAACAGACGAGGAAGG	Bomo_Chr1	2980181	2980204
Bm_sgRNA_00814	AAACAACACCTTTTTTCAAA	KWMTBOMO00101_exon_1	AAACAACACCTTTTTTCAAAAGG	KWMTBOMO00101_exon_1	1874	1897
Bm_sgRNA_10008	ACCTCCAAGAGTAGCACGCT	KWMTBOMO00101_exon_1	ACCTCCAAGAGTAGCACGCTGGG	KWMTBOMO00101_exon_1	1496	1519
Bm_sgRNA_13883	AGAGCCCAGCGTGCTACTCT	KWMTBOMO00101_exon_1	AGAGCCCAGCGTGCTACTCTTGG	KWMTBOMO00101_exon_1	1492	1515
Bm_sgRNA_21342	ATCTTCAAAATCCTTTATAA	KWMTBOMO00101_exon_1	ATCTTCAAAATCCTTTATAAAGG	KWMTBOMO00101_exon_1	3813	3836
Bm_sgRNA_23834	ATTGATCAAAACTTCTTTGT	KWMTBOMO00101_exon_1	ATTGATCAAAACTTCTTTGTAGG	KWMTBOMO00101_exon_1	3144	3167
Bm_sgRNA_38104	CGGCGTGGATACCTTTATAA	KWMTBOMO00101_exon_1	CGGCGTGGATACCTTTATAAAGG	KWMTBOMO00101_exon_1	3824	3847
Bm_sgRNA_53498	GCCCAGCGTGCTACTCTTGG	KWMTBOMO00101_exon_1	GCCCAGCGTGCTACTCTTGGAGG	KWMTBOMO00101_exon_1	1495	1518
Bm_sgRNA_55446	GCTAATCTCATGCAATGGAC	KWMTBOMO00101_exon_1	GCTAATCTCATGCAATGGACGGG	KWMTBOMO00101_exon_1	3787	3810
Bm_sgRNA_70020	TACCTCCAAGAGTAGCACGC	KWMTBOMO00101_exon_1	TACCTCCAAGAGTAGCACGCTGG	KWMTBOMO00101_exon_1	1497	1520
Bm_sgRNA_80459	TGAGTTGCAAAAAATATTGT	KWMTBOMO00101_exon_1	TGAGTTGCAAAAAATATTGTTGG	KWMTBOMO00101_exon_1	3575	3598
Bm_sgRNA_89091	TTGATCAAAACTTCTTTGTA	KWMTBOMO00101_exon_1	TTGATCAAAACTTCTTTGTAGGG	KWMTBOMO00101_exon_1	3145	3168
Bm_sgRNA_35083	CGAACAAAGACTACGCACAC	KWMTBOMO00101_promoter	CGAACAAAGACTACGCACACGGG	Bomo_Chr1	3041712	3041735
Bm_sgRNA_01118	AAACGGTGTCAGTCGAAAAC	KWMTBOMO00104_exon_3	AAACGGTGTCAGTCGAAAACTGG	Bomo_Chr1	3184156	3184179
Bm_sgRNA_02671	AACACGAAGCTTCTTGTGAA	KWMTBOMO00104_exon_3	AACACGAAGCTTCTTGTGAACGG	Bomo_Chr1	3183104	3183127
Bm_sgRNA_13049	AGAAGAACGGGAACGTGAAC	KWMTBOMO00104_exon_3	AGAAGAACGGGAACGTGAACGGG	Bomo_Chr1	3183566	3183589
Bm_sgRNA_27387	CACGAGATAGAACTGCGGAA	KWMTBOMO00104_exon_3	CACGAGATAGAACTGCGGAACGG	Bomo_Chr1	3183273	3183296
Bm_sgRNA_38574	CGGTTATTTGAAGCTCGTTC	KWMTBOMO00104_exon_3	CGGTTATTTGAAGCTCGTTCAGG	Bomo_Chr1	3183187	3183210
Bm_sgRNA_92039	TTTGTCTCTCTGTTGCGCCC	KWMTBOMO00104_exon_3	TTTGTCTCTCTGTTGCGCCCGGG	Bomo_Chr1	3183133	3183156
Bm_sgRNA_15686	AGCTGCATAGCTTTTTAGAC	KWMTBOMO00105_exon_2	AGCTGCATAGCTTTTTAGACTGG	Bomo_Chr1	3191999	3192022
Bm_sgRNA_02394	AAATTCGGAGTCTCCATCGG	KWMTBOMO00105_exon_3	AAATTCGGAGTCTCCATCGGTGG	Bomo_Chr1	3192254	3192277
Bm_sgRNA_10040	ACCTCGGCCCATTCCACCGA	KWMTBOMO00105_exon_3	ACCTCGGCCCATTCCACCGATGG	Bomo_Chr1	3192241	3192264
Bm_sgRNA_10923	ACGGGCGAGTTGGTCACTTA	KWMTBOMO00105_exon_3	ACGGGCGAGTTGGTCACTTACGG	Bomo_Chr1	3192158	3192181
Bm_sgRNA_17604	AGTGAGCTGGCTTCTAGGAT	KWMTBOMO00105_exon_3	AGTGAGCTGGCTTCTAGGATAGG	Bomo_Chr1	3192542	3192565
Bm_sgRNA_22134	ATGGAAAGAGCAGCATGCGG	KWMTBOMO00105_exon_3	ATGGAAAGAGCAGCATGCGGTGG	Bomo_Chr1	3192355	3192378
Bm_sgRNA_75286	TCCATCGGTGGAATGGGCCG	KWMTBOMO00105_exon_3	TCCATCGGTGGAATGGGCCGAGG	Bomo_Chr1	3192242	3192265
Bm_sgRNA_06695	AATGGGCCTCCTTACAACTA	KWMTBOMO00106_exon_4	AATGGGCCTCCTTACAACTATGG	Bomo_Chr1	3213972	3213995
Bm_sgRNA_70432	TACTGAGCAGCTAATGCCAA	KWMTBOMO00106_exon_4	TACTGAGCAGCTAATGCCAATGG	Bomo_Chr1	3214080	3214103
Bm_sgRNA_63389	GTATGTGATTTTCGTTGGAC	KWMTBOMO00106_exon_5	GTATGTGATTTTCGTTGGACAGG	Bomo_Chr1	3213588	3213611
Bm_sgRNA_66295	GTTACATAGTTGTGCAATAC	KWMTBOMO00106_exon_5	GTTACATAGTTGTGCAATACGGG	Bomo_Chr1	3213629	3213652
Bm_sgRNA_41392	CTCCGATTCGTCTTCGGCAT	KWMTBOMO00106_exon_6	CTCCGATTCGTCTTCGGCATCGG	Bomo_Chr1	3212507	3212530
Bm_sgRNA_33642	CCGTAAACATTCCGAAAGGA	KWMTBOMO00107_exon_1	CCGTAAACATTCCGAAAGGATGG	KWMTBOMO00107_exon_1	4899	4922
Bm_sgRNA_35118	CGAACCATGTCGTCCTTACC	KWMTBOMO00107_exon_1	CGAACCATGTCGTCCTTACCAGG	KWMTBOMO00107_exon_1	5137	5160
Bm_sgRNA_46035	GAACCATGTCGTCCTTACCA	KWMTBOMO00107_exon_1	GAACCATGTCGTCCTTACCAGGG	KWMTBOMO00107_exon_1	5136	5159
Bm_sgRNA_73509	TCAAGAGGTACGTATGTCAG	KWMTBOMO00107_exon_1	TCAAGAGGTACGTATGTCAGTGG	KWMTBOMO00107_exon_1	4813	4836
Bm_sgRNA_74302	TCAGCTAGCGCTGAACATCA	KWMTBOMO00107_exon_1	TCAGCTAGCGCTGAACATCATGG	KWMTBOMO00107_exon_1	2016	2039
Bm_sgRNA_82425	TGGACCGAAATAATCTAACC	KWMTBOMO00107_exon_1	TGGACCGAAATAATCTAACCCGG	KWMTBOMO00107_exon_1	4352	4375
Bm_sgRNA_83389	TGGTCAATAAATTCTGTCTT	KWMTBOMO00107_exon_1	TGGTCAATAAATTCTGTCTTTGG	KWMTBOMO00107_exon_1	4879	4902
Bm_sgRNA_12458	ACTTCCACGCCCGGTGCCGG	KWMTBOMO00108_exon_1	ACTTCCACGCCCGGTGCCGGTGG	Bomo_Chr1	3232489	3232512
Bm_sgRNA_13456	AGACATGTTCTCTATGGCGC	KWMTBOMO00108_exon_1	AGACATGTTCTCTATGGCGCAGG	Bomo_Chr1	3232517	3232540
Bm_sgRNA_31472	CCACTATTGATCCTAATCAA	KWMTBOMO00108_exon_1	CCACTATTGATCCTAATCAACGG	Bomo_Chr1	3232372	3232395
Bm_sgRNA_33834	CCGTTGATTAGGATCAATAG	KWMTBOMO00108_exon_1	CCGTTGATTAGGATCAATAGTGG	Bomo_Chr1	3232372	3232395
Bm_sgRNA_54596	GCGCAGGTCACGTGACATCA	KWMTBOMO00108_exon_1	GCGCAGGTCACGTGACATCATGG	Bomo_Chr1	3232533	3232556
Bm_sgRNA_78404	TCTGCTTGTTGCCGTTGATT	KWMTBOMO00108_exon_1	TCTGCTTGTTGCCGTTGATTAGG	Bomo_Chr1	3232361	3232384
Bm_sgRNA_10271	ACGACACCAGCTTGGCGCAC	KWMTBOMO00108_exon_2	ACGACACCAGCTTGGCGCACTGG	Bomo_Chr1	3229317	3229340
Bm_sgRNA_10443	ACGATCTGAGTCCATCGCTC	KWMTBOMO00108_exon_2	ACGATCTGAGTCCATCGCTCTGG	Bomo_Chr1	3229101	3229124
Bm_sgRNA_16826	AGGTTCATAGCTTCTATGAG	KWMTBOMO00108_exon_2	AGGTTCATAGCTTCTATGAGTGG	Bomo_Chr1	3228963	3228986
Bm_sgRNA_25964	CAAGATAAAGAGCGTGAAGA	KWMTBOMO00108_exon_2	CAAGATAAAGAGCGTGAAGAGGG	Bomo_Chr1	3229263	3229286
Bm_sgRNA_29555	CATAGTAGAGGCGATCGTCC	KWMTBOMO00108_exon_2	CATAGTAGAGGCGATCGTCCAGG	Bomo_Chr1	3229186	3229209
Bm_sgRNA_40972	CTCAAGAACTTGATCACGTC	KWMTBOMO00108_exon_2	CTCAAGAACTTGATCACGTCAGG	Bomo_Chr1	3229290	3229313
Bm_sgRNA_77270	TCGTGGATGTTAAATGGGAT	KWMTBOMO00108_exon_2	TCGTGGATGTTAAATGGGATTGG	Bomo_Chr1	3229236	3229259
Bm_sgRNA_26018	CAAGCAGGAGCTGGTGGCCC	KWMTBOMO00109_exon_1	CAAGCAGGAGCTGGTGGCCCTGG	Bomo_Chr1	3235569	3235592
Bm_sgRNA_46964	GAAGTTCTGCGACGTCTGCG	KWMTBOMO00109_exon_1	GAAGTTCTGCGACGTCTGCGAGG	Bomo_Chr1	3235592	3235615
Bm_sgRNA_49714	GAGGTATAACAAGCAGGAGC	KWMTBOMO00109_exon_1	GAGGTATAACAAGCAGGAGCTGG	Bomo_Chr1	3235560	3235583
Bm_sgRNA_54439	GCGAGGGTGTGCTAGTCATG	KWMTBOMO00109_exon_1	GCGAGGGTGTGCTAGTCATGAGG	Bomo_Chr1	3235619	3235642
Bm_sgRNA_74783	TCATGACTAGCACACCCTCG	KWMTBOMO00109_exon_1	TCATGACTAGCACACCCTCGCGG	Bomo_Chr1	3235617	3235640
Bm_sgRNA_78338	TCTGCGACGTCTGCGAGGCC	KWMTBOMO00109_exon_1	TCTGCGACGTCTGCGAGGCCAGG	Bomo_Chr1	3235587	3235610
Bm_sgRNA_03561	AACTACACTCTGACCAATAT	KWMTBOMO00109_promoter	AACTACACTCTGACCAATATCGG	Bomo_Chr1	3235486	3235509
Bm_sgRNA_22550	ATGTATTATAAAGATATTGT	KWMTBOMO00109_promoter	ATGTATTATAAAGATATTGTAGG	Bomo_Chr1	3235399	3235422
Bm_sgRNA_87871	TTCGAAGTCGAACTGTTATA	KWMTBOMO00109_promoter	TTCGAAGTCGAACTGTTATACGG	Bomo_Chr1	3235463	3235486
Bm_sgRNA_13286	AGAATGACGATTCAGAACGG	KWMTBOMO00110_exon_1	AGAATGACGATTCAGAACGGTGG	Bomo_Chr1	3286692	3286715
Bm_sgRNA_23072	ATTAGAATGACGATTCAGAA	KWMTBOMO00110_exon_1	ATTAGAATGACGATTCAGAACGG	Bomo_Chr1	3286689	3286712
Bm_sgRNA_38692	CGTACAAGCCAATATTTCAG	KWMTBOMO00110_exon_1	CGTACAAGCCAATATTTCAGTGG	Bomo_Chr1	3286568	3286591
Bm_sgRNA_38888	CGTATTTGGCTTTAGATAAA	KWMTBOMO00110_exon_1	CGTATTTGGCTTTAGATAAATGG	Bomo_Chr1	3286657	3286680
Bm_sgRNA_77656	TCTATATAAAATTTGGAGAA	KWMTBOMO00110_exon_1	TCTATATAAAATTTGGAGAATGG	Bomo_Chr1	3286727	3286750
Bm_sgRNA_30279	CATGCTTGGCAGAAGTCGCT	KWMTBOMO00110_exon_2	CATGCTTGGCAGAAGTCGCTGGG	Bomo_Chr1	3288452	3288475
Bm_sgRNA_71769	TATATCGGCTGTGATGAGTT	KWMTBOMO00110_exon_2	TATATCGGCTGTGATGAGTTCGG	Bomo_Chr1	3288402	3288425
Bm_sgRNA_18907	ATACATTATGCAATGTCTTG	KWMTBOMO00110_promoter	ATACATTATGCAATGTCTTGAGG	Bomo_Chr1	3286501	3286524
Bm_sgRNA_21714	ATGAGTTTTTAATCGTGCGC	KWMTBOMO00110_promoter	ATGAGTTTTTAATCGTGCGCGGG	Bomo_Chr1	3286480	3286503
Bm_sgRNA_36592	CGCAGGAGAAACAATGCACG	KWMTBOMO00111_exon_2	CGCAGGAGAAACAATGCACGTGG	Bomo_Chr1	3378487	3378510
Bm_sgRNA_38726	CGTACGTGTCGCCTTTATTT	KWMTBOMO00111_exon_2	CGTACGTGTCGCCTTTATTTAGG	Bomo_Chr1	3378526	3378549
Bm_sgRNA_39983	CTAAATAAAGGCGACACGTA	KWMTBOMO00111_exon_2	CTAAATAAAGGCGACACGTACGG	Bomo_Chr1	3378527	3378550
Bm_sgRNA_54822	GCGCTGTGCTCGCTGCAACA	KWMTBOMO00111_exon_2	GCGCTGTGCTCGCTGCAACACGG	Bomo_Chr1	3378418	3378441
Bm_sgRNA_60401	GGGCGTATTGCATAACGCGC	KWMTBOMO00111_exon_2	GGGCGTATTGCATAACGCGCAGG	Bomo_Chr1	3378504	3378527
Bm_sgRNA_62798	GTACGTGTCGCCTTTATTTA	KWMTBOMO00111_exon_2	GTACGTGTCGCCTTTATTTAGGG	Bomo_Chr1	3378525	3378548
Bm_sgRNA_70309	TACGTGTCGCCTTTATTTAG	KWMTBOMO00111_exon_2	TACGTGTCGCCTTTATTTAGGGG	Bomo_Chr1	3378524	3378547
Bm_sgRNA_89250	TTGCAGCGAGCACAGCGCTT	KWMTBOMO00111_exon_2	TTGCAGCGAGCACAGCGCTTGGG	Bomo_Chr1	3378413	3378436
Bm_sgRNA_13917	AGAGCTCAGAAGGATCCCCC	KWMTBOMO00112_exon_1	AGAGCTCAGAAGGATCCCCCGGG	Bomo_Chr1	3557484	3557507
Bm_sgRNA_31571	CCAGACGAGTGCGCAGGCTG	KWMTBOMO00112_exon_1	CCAGACGAGTGCGCAGGCTGCGG	Bomo_Chr1	3557510	3557533
Bm_sgRNA_33170	CCGCAGCCTGCGCACTCGTC	KWMTBOMO00112_exon_1	CCGCAGCCTGCGCACTCGTCTGG	Bomo_Chr1	3557510	3557533
Bm_sgRNA_47852	GACCAGTTCGGAGGGCACGA	KWMTBOMO00112_exon_1	GACCAGTTCGGAGGGCACGACGG	Bomo_Chr1	3557434	3557457
Bm_sgRNA_48136	GACGAGTGCGCAGGCTGCGG	KWMTBOMO00112_exon_1	GACGAGTGCGCAGGCTGCGGAGG	Bomo_Chr1	3557513	3557536
Bm_sgRNA_54575	GCGCACTCGTCTGGTGCCCC	KWMTBOMO00112_exon_1	GCGCACTCGTCTGGTGCCCCGGG	Bomo_Chr1	3557501	3557524
Bm_sgRNA_81702	TGCGCACTCGTCTGGTGCCC	KWMTBOMO00112_exon_1	TGCGCACTCGTCTGGTGCCCCGG	Bomo_Chr1	3557502	3557525
Bm_sgRNA_88971	TTGAGACAAAGAGACCAGTT	KWMTBOMO00112_exon_1	TTGAGACAAAGAGACCAGTTCGG	Bomo_Chr1	3557422	3557445
Bm_sgRNA_15857	AGCTTTGAATCGGCCATGAT	KWMTBOMO00113_exon_1	AGCTTTGAATCGGCCATGATCGG	Bomo_Chr1	3619433	3619456
Bm_sgRNA_24694	ATTTTCCCCATTAGTTCTGC	KWMTBOMO00113_exon_1	ATTTTCCCCATTAGTTCTGCCGG	Bomo_Chr1	3619934	3619957
Bm_sgRNA_34382	CCTGACCCTCGGATAGGAGC	KWMTBOMO00113_exon_1	CCTGACCCTCGGATAGGAGCAGG	Bomo_Chr1	3620481	3620504
Bm_sgRNA_47797	GACCAACTGTTGTTCTCCGC	KWMTBOMO00113_exon_1	GACCAACTGTTGTTCTCCGCCGG	Bomo_Chr1	3619146	3619169
Bm_sgRNA_51150	GATGTACCTGACCCTCGGAT	KWMTBOMO00113_exon_1	GATGTACCTGACCCTCGGATAGG	Bomo_Chr1	3620487	3620510
Bm_sgRNA_62105	GGTTGGATAGCTGATCGATT	KWMTBOMO00113_exon_1	GGTTGGATAGCTGATCGATTTGG	Bomo_Chr1	3619602	3619625
Bm_sgRNA_00883	AAACAGCACTACAAACAATA	KWMTBOMO00113_promoter	AAACAGCACTACAAACAATATGG	Bomo_Chr1	3618868	3618891
Bm_sgRNA_00934	AAACATGAATACATTCGCCA	KWMTBOMO00113_promoter	AAACATGAATACATTCGCCACGG	Bomo_Chr1	3618907	3618930
Bm_sgRNA_13757	AGAGAAGGATCCAACTGGGC	KWMTBOMO00114_exon_2	AGAGAAGGATCCAACTGGGCTGG	KWMTBOMO00114_exon_2	484	507
Bm_sgRNA_91342	TTTCTCTGAAGGATAAAATA	KWMTBOMO00114_exon_2	TTTCTCTGAAGGATAAAATACGG	KWMTBOMO00114_exon_2	277	300
Bm_sgRNA_31108	CCAAGTCGCAACCACAATGG	KWMTBOMO00114_exon_3	CCAAGTCGCAACCACAATGGTGG	Bomo_Chr1	3655422	3655445
Bm_sgRNA_90190	TTGTGGTTGCGACTTGGACA	KWMTBOMO00114_exon_3	TTGTGGTTGCGACTTGGACACGG	Bomo_Chr1	3655416	3655439
Bm_sgRNA_30768	CATTTCATCAATAACTACGC	KWMTBOMO00115_exon_2	CATTTCATCAATAACTACGCTGG	Bomo_Chr1	3669371	3669394
Bm_sgRNA_44635	CTTGCTGTGCGCGATGGAAG	KWMTBOMO00115_exon_2	CTTGCTGTGCGCGATGGAAGGGG	Bomo_Chr1	3669299	3669322
Bm_sgRNA_38114	CGGCGTTATCCTTAGCGTTA	KWMTBOMO00115_exon_3	CGGCGTTATCCTTAGCGTTAAGG	Bomo_Chr1	3672190	3672213
Bm_sgRNA_88434	TTCTCGACAGCCACGTGGAG	KWMTBOMO00115_exon_3	TTCTCGACAGCCACGTGGAGCGG	Bomo_Chr1	3672221	3672244
Bm_sgRNA_49411	GAGCTTGACACTTCTCGTTG	KWMTBOMO00115_exon_4	GAGCTTGACACTTCTCGTTGAGG	Bomo_Chr1	3673513	3673536
Bm_sgRNA_74507	TCAGTGTGCCACGTAGGCAT	KWMTBOMO00115_promoter	TCAGTGTGCCACGTAGGCATCGG	Bomo_Chr1	3668039	3668062
Bm_sgRNA_03299	AACGCCGCGAGTCGGCCTGA	KWMTBOMO00116_exon_1	AACGCCGCGAGTCGGCCTGAGGG	KWMTBOMO00116_exon_1	1804	1827
Bm_sgRNA_04801	AAGGAGTTCCCTAATATCGT	KWMTBOMO00116_exon_1	AAGGAGTTCCCTAATATCGTCGG	KWMTBOMO00116_exon_1	2052	2075
Bm_sgRNA_05462	AATAAAGCTAAATGGGTCGG	KWMTBOMO00116_exon_1	AATAAAGCTAAATGGGTCGGCGG	KWMTBOMO00116_exon_1	943	966
Bm_sgRNA_08864	ACATCACCTCGACATTAGAT	KWMTBOMO00116_exon_1	ACATCACCTCGACATTAGATAGG	KWMTBOMO00116_exon_1	2124	2147
Bm_sgRNA_09964	ACCTAAATTGTAAACATATC	KWMTBOMO00116_exon_1	ACCTAAATTGTAAACATATCAGG	KWMTBOMO00116_exon_1	2535	2558
Bm_sgRNA_10075	ACCTGATATGTTTACAATTT	KWMTBOMO00116_exon_1	ACCTGATATGTTTACAATTTAGG	KWMTBOMO00116_exon_1	2534	2557
Bm_sgRNA_12066	ACTGCGGTGCTATTTCAGAG	KWMTBOMO00116_exon_1	ACTGCGGTGCTATTTCAGAGGGG	KWMTBOMO00116_exon_1	790	813
Bm_sgRNA_13800	AGAGACTTCGTCTCATCCAA	KWMTBOMO00116_exon_1	AGAGACTTCGTCTCATCCAAGGG	KWMTBOMO00116_exon_1	1333	1356
Bm_sgRNA_23673	ATTCTTATCGATGAACAATT	KWMTBOMO00116_exon_1	ATTCTTATCGATGAACAATTCGG	KWMTBOMO00116_exon_1	1309	1332
Bm_sgRNA_24681	ATTTTCAAACTATTCAACAT	KWMTBOMO00116_exon_1	ATTTTCAAACTATTCAACATGGG	KWMTBOMO00116_exon_1	1138	1161
Bm_sgRNA_25567	CAACATCACGATGAGTTGGA	KWMTBOMO00116_exon_1	CAACATCACGATGAGTTGGACGG	KWMTBOMO00116_exon_1	1533	1556
Bm_sgRNA_35498	CGACCAAAACCGTTATACAC	KWMTBOMO00116_exon_1	CGACCAAAACCGTTATACACGGG	KWMTBOMO00116_exon_1	1216	1239
Bm_sgRNA_39006	CGTCCCGTCGTTATGAAGCT	KWMTBOMO00116_exon_1	CGTCCCGTCGTTATGAAGCTCGG	KWMTBOMO00116_exon_1	2305	2328
Bm_sgRNA_39667	CGTTCCCGTCACGAGGACTG	KWMTBOMO00116_exon_1	CGTTCCCGTCACGAGGACTGTGG	KWMTBOMO00116_exon_1	2267	2290
Bm_sgRNA_43754	CTTAGAACGATCTTATCCGG	KWMTBOMO00116_exon_1	CTTAGAACGATCTTATCCGGTGG	KWMTBOMO00116_exon_1	2611	2634
Bm_sgRNA_46023	GAACCACTGTCCTAGGGCTA	KWMTBOMO00116_exon_1	GAACCACTGTCCTAGGGCTAGGG	KWMTBOMO00116_exon_1	849	872
Bm_sgRNA_47283	GAATGTCATCGATGCATCCA	KWMTBOMO00116_exon_1	GAATGTCATCGATGCATCCAGGG	KWMTBOMO00116_exon_1	657	680
Bm_sgRNA_59802	GGCTCTTCTATAGTAAATGA	KWMTBOMO00116_exon_1	GGCTCTTCTATAGTAAATGACGG	KWMTBOMO00116_exon_1	2742	2765
Bm_sgRNA_60130	GGGAGCTCTGTCATTCTGGC	KWMTBOMO00116_exon_1	GGGAGCTCTGTCATTCTGGCGGG	KWMTBOMO00116_exon_1	2560	2583
Bm_sgRNA_62383	GTAACTATGCCCCCCCTCGT	KWMTBOMO00116_exon_1	GTAACTATGCCCCCCCTCGTAGG	KWMTBOMO00116_exon_1	1828	1851
Bm_sgRNA_66038	GTGTGCCGAATCTCACTGAC	KWMTBOMO00116_exon_1	GTGTGCCGAATCTCACTGACGGG	KWMTBOMO00116_exon_1	2668	2691
Bm_sgRNA_68227	TAAACGGACGCGATAACGAT	KWMTBOMO00116_exon_1	TAAACGGACGCGATAACGATCGG	KWMTBOMO00116_exon_1	2638	2661
Bm_sgRNA_68500	TAAATTGTAAACATATCAGG	KWMTBOMO00116_exon_1	TAAATTGTAAACATATCAGGTGG	KWMTBOMO00116_exon_1	2532	2555
Bm_sgRNA_73968	TCACGGAGCACATTCTTGTG	KWMTBOMO00116_exon_1	TCACGGAGCACATTCTTGTGGGG	KWMTBOMO00116_exon_1	1245	1268
Bm_sgRNA_75177	TCCAGCTGTGAGAGGTCGTG	KWMTBOMO00116_exon_1	TCCAGCTGTGAGAGGTCGTGGGG	KWMTBOMO00116_exon_1	1032	1055
Bm_sgRNA_80169	TGAGAGGTCGTGGGGAGGAG	KWMTBOMO00116_exon_1	TGAGAGGTCGTGGGGAGGAGCGG	KWMTBOMO00116_exon_1	1040	1063
Bm_sgRNA_19388	ATAGGATTTTTTAACGCTTA	KWMTBOMO00116_promoter	ATAGGATTTTTTAACGCTTACGG	Bomo_Chr25	6513831	6513854
Bm_sgRNA_54393	GCGAGATTGTCGGACGCGGT	KWMTBOMO00116_promoter	GCGAGATTGTCGGACGCGGTCGG	Bomo_Chr25	6514062	6514085
Bm_sgRNA_55105	GCGGTCGGAGGGCAAGTCGC	KWMTBOMO00116_promoter	GCGGTCGGAGGGCAAGTCGCGGG	Bomo_Chr25	6514077	6514100
Bm_sgRNA_58198	GGAGGGCAAGTCGCGGGAGA	KWMTBOMO00116_promoter	GGAGGGCAAGTCGCGGGAGAGGG	Bomo_Chr25	6514083	6514106
Bm_sgRNA_15619	AGCTCGGAGGCGGTTTTGGC	KWMTBOMO00117_exon_1	AGCTCGGAGGCGGTTTTGGCGGG	KWMTBOMO00117_exon_1	411	434
Bm_sgRNA_24904	CAAAACCGCCTCCGAGCTTC	KWMTBOMO00117_exon_1	CAAAACCGCCTCCGAGCTTCCGG	KWMTBOMO00117_exon_1	406	429
Bm_sgRNA_34215	CCTCGCCCCCGCCTCATCGA	KWMTBOMO00117_exon_1	CCTCGCCCCCGCCTCATCGACGG	KWMTBOMO00117_exon_1	1283	1306
Bm_sgRNA_36433	CGATTTATTTTAGGGGCTCG	KWMTBOMO00117_exon_1	CGATTTATTTTAGGGGCTCGGGG	KWMTBOMO00117_exon_1	442	465
Bm_sgRNA_42293	CTGAAGGATAACCGGGGGAG	KWMTBOMO00117_exon_1	CTGAAGGATAACCGGGGGAGGGG	KWMTBOMO00117_exon_1	1086	1109
Bm_sgRNA_46226	GAACTCCGCGTTGTAATACG	KWMTBOMO00117_exon_1	GAACTCCGCGTTGTAATACGCGG	KWMTBOMO00117_exon_1	877	900
Bm_sgRNA_48219	GACGCGGCGACGGAGTGGCA	KWMTBOMO00117_exon_1	GACGCGGCGACGGAGTGGCACGG	KWMTBOMO00117_exon_1	1133	1156
Bm_sgRNA_52260	GCACGGGCTGGGGGCGCAAC	KWMTBOMO00117_exon_1	GCACGGGCTGGGGGCGCAACGGG	KWMTBOMO00117_exon_1	1150	1173
Bm_sgRNA_52663	GCAGCTTTTCTCGCCAGTAT	KWMTBOMO00117_exon_1	GCAGCTTTTCTCGCCAGTATAGG	KWMTBOMO00117_exon_1	1447	1470
Bm_sgRNA_54393	GCGAGATTGTCGGACGCGGT	KWMTBOMO00117_exon_1	GCGAGATTGTCGGACGCGGTCGG	KWMTBOMO00117_exon_1	205	228
Bm_sgRNA_55105	GCGGTCGGAGGGCAAGTCGC	KWMTBOMO00117_exon_1	GCGGTCGGAGGGCAAGTCGCGGG	KWMTBOMO00117_exon_1	220	243
Bm_sgRNA_55138	GCGGTTCCGTCGCGGTTTTT	KWMTBOMO00117_exon_1	GCGGTTCCGTCGCGGTTTTTTGG	KWMTBOMO00117_exon_1	518	541
Bm_sgRNA_58198	GGAGGGCAAGTCGCGGGAGA	KWMTBOMO00117_exon_1	GGAGGGCAAGTCGCGGGAGAGGG	KWMTBOMO00117_exon_1	226	249
Bm_sgRNA_58844	GGCAGGCACGACAGAGGCTG	KWMTBOMO00117_exon_1	GGCAGGCACGACAGAGGCTGCGG	KWMTBOMO00117_exon_1	1482	1505
Bm_sgRNA_63340	GTATGCACACCGGTCGCGGT	KWMTBOMO00117_exon_1	GTATGCACACCGGTCGCGGTAGG	KWMTBOMO00117_exon_1	777	800
Bm_sgRNA_19260	ATAGAGGCACCCGTCACGTG	KWMTBOMO00117_promoter	ATAGAGGCACCCGTCACGTGCGG	Bomo_Chr1	3679933	3679956
Bm_sgRNA_19260	ATAGAGGCACCCGTCACGTG	KWMTBOMO00118_promoter	ATAGAGGCACCCGTCACGTGCGG	Bomo_Chr1	3679933	3679956
Bm_sgRNA_01966	AAATATACCTTGGTCGGGGC	KWMTBOMO00119_exon_1	AAATATACCTTGGTCGGGGCAGG	Bomo_Chr1	3714493	3714516
Bm_sgRNA_23055	ATTACTCAGCTGGAATCCTG	KWMTBOMO00119_exon_1	ATTACTCAGCTGGAATCCTGAGG	Bomo_Chr1	3714412	3714435
Bm_sgRNA_28052	CAGACACGCCCGTGTAGTAC	KWMTBOMO00119_exon_1	CAGACACGCCCGTGTAGTACTGG	Bomo_Chr1	3714359	3714382
Bm_sgRNA_38799	CGTAGTCTTGATTACTCAGC	KWMTBOMO00119_exon_1	CGTAGTCTTGATTACTCAGCTGG	Bomo_Chr1	3714422	3714445
Bm_sgRNA_41094	CTCAGCTGGAATCCTGAGGC	KWMTBOMO00119_exon_1	CTCAGCTGGAATCCTGAGGCTGG	Bomo_Chr1	3714408	3714431
Bm_sgRNA_16518	AGGGCTTGAACTCGTAATGG	KWMTBOMO00119_promoter	AGGGCTTGAACTCGTAATGGTGG	Bomo_Chr1	3714194	3714217
Bm_sgRNA_89031	TTGAGGGCTTGAACTCGTAA	KWMTBOMO00119_promoter	TTGAGGGCTTGAACTCGTAATGG	Bomo_Chr1	3714191	3714214
Bm_sgRNA_58277	GGAGTCGGAGTAGCGAGCCA	KWMTBOMO00120_exon_1	GGAGTCGGAGTAGCGAGCCAGGG	Bomo_Chr1	3728120	3728143
Bm_sgRNA_83681	TGTAAACTGTGAGGAGGCTG	KWMTBOMO00120_exon_1	TGTAAACTGTGAGGAGGCTGAGG	Bomo_Chr1	3728059	3728082
Bm_sgRNA_14242	AGATCCTGGTGGTGCTATCA	KWMTBOMO00120_exon_2	AGATCCTGGTGGTGCTATCATGG	Bomo_Chr1	3728481	3728504
Bm_sgRNA_46427	GAAGACATGTGGCAAGATCC	KWMTBOMO00120_exon_2	GAAGACATGTGGCAAGATCCTGG	Bomo_Chr1	3728467	3728490
Bm_sgRNA_48472	GACTCAGAGTCGAAGACATG	KWMTBOMO00120_exon_2	GACTCAGAGTCGAAGACATGTGG	Bomo_Chr1	3728456	3728479
Bm_sgRNA_61815	GGTGGTGCTATCATGGATGC	KWMTBOMO00120_exon_2	GGTGGTGCTATCATGGATGCTGG	Bomo_Chr1	3728488	3728511
Bm_sgRNA_72284	TATGAAGAGCGAAAACGGCA	KWMTBOMO00120_exon_2	TATGAAGAGCGAAAACGGCATGG	Bomo_Chr1	3728520	3728543
Bm_sgRNA_67244	GTTGGAATTATTTCAGTAAA	KWMTBOMO00121_exon_4	GTTGGAATTATTTCAGTAAAAGG	Bomo_Chr1	3778089	3778112
Bm_sgRNA_44444	CTTGAAAGAATCATTCTGTT	KWMTBOMO00121_promoter	CTTGAAAGAATCATTCTGTTCGG	Bomo_Chr1	3781390	3781413
Bm_sgRNA_73719	TCAATTTAAAAAGAAGGAAG	KWMTBOMO00121_promoter	TCAATTTAAAAAGAAGGAAGAGG	Bomo_Chr1	3781427	3781450
Bm_sgRNA_35582	CGACGAATAATTACGATGTC	KWMTBOMO00122_exon_1	CGACGAATAATTACGATGTCTGG	Bomo_Chr1	3785309	3785332
Bm_sgRNA_35783	CGAGAAAAGTGAGTTCCGTC	KWMTBOMO00122_exon_1	CGAGAAAAGTGAGTTCCGTCTGG	Bomo_Chr1	3785243	3785266
Bm_sgRNA_00449	AAAAGCACTGAGAAGTGAAA	KWMTBOMO00122_exon_2	AAAAGCACTGAGAAGTGAAAAGG	Bomo_Chr1	3786757	3786780
Bm_sgRNA_19315	ATAGCCGACAATATCAAAAC	KWMTBOMO00122_exon_2	ATAGCCGACAATATCAAAACAGG	Bomo_Chr1	3787034	3787057
Bm_sgRNA_30637	CATTGAGAATAAAAGTTGCT	KWMTBOMO00122_exon_2	CATTGAGAATAAAAGTTGCTAGG	Bomo_Chr1	3786933	3786956
Bm_sgRNA_72770	TATTATTATGAGACGGTTCA	KWMTBOMO00122_promoter	TATTATTATGAGACGGTTCACGG	Bomo_Chr1	3785110	3785133
Bm_sgRNA_32572	CCCGAGTGTCCTGTAGATGG	KWMTBOMO00123_exon_1	CCCGAGTGTCCTGTAGATGGCGG	Bomo_Chr1	3791074	3791097
Bm_sgRNA_70790	TAGATGGCGGTTGGTCGCCG	KWMTBOMO00123_exon_1	TAGATGGCGGTTGGTCGCCGTGG	Bomo_Chr1	3791087	3791110
Bm_sgRNA_78527	TCTGTACGTTGCCCCATACA	KWMTBOMO00123_exon_1	TCTGTACGTTGCCCCATACAAGG	Bomo_Chr1	3791962	3791985
Bm_sgRNA_91923	TTTGGTGCCCAAGAACCGCA	KWMTBOMO00123_exon_1	TTTGGTGCCCAAGAACCGCAAGG	Bomo_Chr1	3793753	3793776
Bm_sgRNA_11134	ACGTGAGAAAAGATCTGCCG	KWMTBOMO00124_exon_3	ACGTGAGAAAAGATCTGCCGAGG	Bomo_Chr1	3800540	3800563
Bm_sgRNA_19603	ATATATTCAGGCCATGCTTA	KWMTBOMO00124_exon_3	ATATATTCAGGCCATGCTTATGG	Bomo_Chr1	3800513	3800536
Bm_sgRNA_39273	CGTGAGAAAAGATCTGCCGA	KWMTBOMO00124_exon_3	CGTGAGAAAAGATCTGCCGAGGG	Bomo_Chr1	3800539	3800562
Bm_sgRNA_58793	GGCAGATCTTTTCTCACGTA	KWMTBOMO00124_exon_3	GGCAGATCTTTTCTCACGTATGG	Bomo_Chr1	3800544	3800567
Bm_sgRNA_64956	GTGAGAAAAGATCTGCCGAG	KWMTBOMO00124_exon_3	GTGAGAAAAGATCTGCCGAGGGG	Bomo_Chr1	3800538	3800561
Bm_sgRNA_81457	TGCCGAGGGGATATATATTC	KWMTBOMO00124_exon_3	TGCCGAGGGGATATATATTCAGG	Bomo_Chr1	3800525	3800548
Bm_sgRNA_31108	CCAAGTCGCAACCACAATGG	KWMTBOMO00125_exon_1	CCAAGTCGCAACCACAATGGTGG	Bomo_Chr1	3818163	3818186
Bm_sgRNA_90190	TTGTGGTTGCGACTTGGACA	KWMTBOMO00125_exon_1	TTGTGGTTGCGACTTGGACACGG	Bomo_Chr1	3818157	3818180
Bm_sgRNA_06954	AATTACGGGTGGCATGATGA	KWMTBOMO00126_exon_2	AATTACGGGTGGCATGATGAGGG	Bomo_Chr1	3824293	3824316
Bm_sgRNA_62549	GTAATTATGCAGCGTTCTGC	KWMTBOMO00126_exon_2	GTAATTATGCAGCGTTCTGCTGG	Bomo_Chr1	3824310	3824333
Bm_sgRNA_15587	AGCTCAGAGTGGCCAACAGT	KWMTBOMO00126_exon_3	AGCTCAGAGTGGCCAACAGTTGG	Bomo_Chr1	3825661	3825684
Bm_sgRNA_27289	CACCTCGAGGGTCTACTCTC	KWMTBOMO00126_exon_3	CACCTCGAGGGTCTACTCTCCGG	Bomo_Chr1	3825630	3825653
Bm_sgRNA_28168	CAGAGTGGCCAACAGTTGGC	KWMTBOMO00126_exon_3	CAGAGTGGCCAACAGTTGGCAGG	Bomo_Chr1	3825665	3825688
Bm_sgRNA_49561	GAGGCCACCGAGTACAGGCG	KWMTBOMO00126_exon_3	GAGGCCACCGAGTACAGGCGCGG	Bomo_Chr1	3825596	3825619
Bm_sgRNA_53269	GCCACCGAGTACAGGCGCGG	KWMTBOMO00126_exon_3	GCCACCGAGTACAGGCGCGGCGG	Bomo_Chr1	3825593	3825616
Bm_sgRNA_62915	GTAGACCCTCGAGGTGTTGT	KWMTBOMO00126_exon_3	GTAGACCCTCGAGGTGTTGTGGG	Bomo_Chr1	3825623	3825646
Bm_sgRNA_65827	GTGGTCTCGTGCTCTTGTCT	KWMTBOMO00126_exon_3	GTGGTCTCGTGCTCTTGTCTTGG	Bomo_Chr1	3825697	3825720
Bm_sgRNA_73796	TCACAGCCCACAACACCTCG	KWMTBOMO00126_exon_3	TCACAGCCCACAACACCTCGAGG	Bomo_Chr1	3825617	3825640
Bm_sgRNA_84498	TGTCTTGGTACTATCCTCAA	KWMTBOMO00126_exon_3	TGTCTTGGTACTATCCTCAACGG	Bomo_Chr1	3825712	3825735
Bm_sgRNA_26891	CACAGCGAGAAGCGTCTCCG	KWMTBOMO00127_exon_4	CACAGCGAGAAGCGTCTCCGTGG	Bomo_Chr1	3920590	3920613
Bm_sgRNA_59793	GGCTCTCTAGAGACTGTCGG	KWMTBOMO00128_exon_1	GGCTCTCTAGAGACTGTCGGAGG	Bomo_Chr1	3972343	3972366
Bm_sgRNA_69872	TACCACCGGTACGACCTGAA	KWMTBOMO00128_exon_1	TACCACCGGTACGACCTGAACGG	Bomo_Chr1	3972423	3972446
Bm_sgRNA_87737	TTCCGTTCAGGTCGTACCGG	KWMTBOMO00128_exon_1	TTCCGTTCAGGTCGTACCGGTGG	Bomo_Chr1	3972421	3972444
Bm_sgRNA_27711	CACTCAGACACGGTTCGGTC	KWMTBOMO00128_promoter	CACTCAGACACGGTTCGGTCGGG	Bomo_Chr1	3972921	3972944
Bm_sgRNA_42207	CTCTTTCCACAAGCCGCGCC	KWMTBOMO00128_promoter	CTCTTTCCACAAGCCGCGCCGGG	Bomo_Chr1	3972886	3972909
Bm_sgRNA_53914	GCCGGGCGGTCGTCGCATCT	KWMTBOMO00128_promoter	GCCGGGCGGTCGTCGCATCTCGG	Bomo_Chr1	3972869	3972892
Bm_sgRNA_14883	AGCCAAGAAAACAATCCCCG	KWMTBOMO00129_exon_1	AGCCAAGAAAACAATCCCCGCGG	Bomo_Chr1	4048675	4048698
Bm_sgRNA_37172	CGCGGAGCAACTCAAGAGAT	KWMTBOMO00129_exon_1	CGCGGAGCAACTCAAGAGATGGG	Bomo_Chr1	4048758	4048781
Bm_sgRNA_40520	CTAGAGGCGCGCTTCGGCGT	KWMTBOMO00129_exon_1	CTAGAGGCGCGCTTCGGCGTCGG	Bomo_Chr1	4048709	4048732
Bm_sgRNA_40591	CTAGGATTCAGTTTTCCGCG	KWMTBOMO00129_exon_1	CTAGGATTCAGTTTTCCGCGGGG	Bomo_Chr1	4048690	4048713
Bm_sgRNA_61530	GGTGAAGACCATATCGTGTG	KWMTBOMO00129_exon_1	GGTGAAGACCATATCGTGTGAGG	Bomo_Chr1	4048840	4048863
Bm_sgRNA_64851	GTGAAGACCATATCGTGTGA	KWMTBOMO00129_exon_1	GTGAAGACCATATCGTGTGAGGG	Bomo_Chr1	4048839	4048862
Bm_sgRNA_77602	TCTAGGATTCAGTTTTCCGC	KWMTBOMO00129_exon_1	TCTAGGATTCAGTTTTCCGCGGG	Bomo_Chr1	4048691	4048714
Bm_sgRNA_84584	TGTGAGGGGTGGCGACTCGC	KWMTBOMO00129_exon_1	TGTGAGGGGTGGCGACTCGCTGG	Bomo_Chr1	4048824	4048847
Bm_sgRNA_88700	TTCTTGGCTGCGTGTACGTC	KWMTBOMO00129_exon_1	TTCTTGGCTGCGTGTACGTCCGG	Bomo_Chr1	4048661	4048684
Bm_sgRNA_59141	GGCCGAGGATCCGCCACGTC	KWMTBOMO00130_exon_10	GGCCGAGGATCCGCCACGTCCGG	Bomo_Chr1	4190518	4190541
Bm_sgRNA_20355	ATCATGTGCATCCACGAAGC	KWMTBOMO00130_exon_8	ATCATGTGCATCCACGAAGCGGG	Bomo_Chr1	4184025	4184048
Bm_sgRNA_59406	GGCGCACTGTCGGATGCTCT	KWMTBOMO00130_exon_8	GGCGCACTGTCGGATGCTCTCGG	Bomo_Chr1	4183859	4183882
Bm_sgRNA_15578	AGCTCAACGAGATTTCCTTG	KWMTBOMO00130_exon_9	AGCTCAACGAGATTTCCTTGTGG	Bomo_Chr1	4189273	4189296
Bm_sgRNA_25058	CAAACCCCAGTGCAGATCGC	KWMTBOMO00130_exon_9	CAAACCCCAGTGCAGATCGCGGG	Bomo_Chr1	4189236	4189259
Bm_sgRNA_18075	AGTTCGGTTGAACGAGCGCG	KWMTBOMO00131_exon_1	AGTTCGGTTGAACGAGCGCGAGG	Bomo_Chr1	4193426	4193449
Bm_sgRNA_39064	CGTCGACTCGATACACCAAG	KWMTBOMO00131_exon_1	CGTCGACTCGATACACCAAGTGG	Bomo_Chr1	4193393	4193416
Bm_sgRNA_50555	GATCCCGCCGAGCGGAGTTT	KWMTBOMO00131_exon_1	GATCCCGCCGAGCGGAGTTTTGG	Bomo_Chr1	4193455	4193478
Bm_sgRNA_58335	GGAGTTTTGGGCAGGAAGTT	KWMTBOMO00131_exon_1	GGAGTTTTGGGCAGGAAGTTCGG	Bomo_Chr1	4193442	4193465
Bm_sgRNA_63294	GTATCTCCCTTGGTTTGGGC	KWMTBOMO00131_exon_1	GTATCTCCCTTGGTTTGGGCAGG	Bomo_Chr1	4193564	4193587
Bm_sgRNA_73836	TCACCAACCTGCCCAAACCA	KWMTBOMO00131_exon_1	TCACCAACCTGCCCAAACCAAGG	Bomo_Chr1	4193557	4193580
Bm_sgRNA_02017	AAATCAATCTAATTTCTATG	KWMTBOMO00132_exon_1	AAATCAATCTAATTTCTATGAGG	Bomo_Chr1	4225938	4225961
Bm_sgRNA_01276	AAACTTGTAACGTAATATTC	KWMTBOMO00132_exon_3	AAACTTGTAACGTAATATTCCGG	Bomo_Chr1	4222379	4222402
Bm_sgRNA_01069	AAACGATCCCTGCACACGTT	KWMTBOMO00132_exon_4	AAACGATCCCTGCACACGTTGGG	Bomo_Chr1	4214085	4214108
Bm_sgRNA_22111	ATGCTTCGAGGGGTCGGGCA	KWMTBOMO00132_exon_4	ATGCTTCGAGGGGTCGGGCAGGG	Bomo_Chr1	4214031	4214054
Bm_sgRNA_27601	CACGTATGCTTCGAGGGGTC	KWMTBOMO00132_exon_4	CACGTATGCTTCGAGGGGTCGGG	Bomo_Chr1	4214026	4214049
Bm_sgRNA_69588	TACAATTAGGTCCACACGTG	KWMTBOMO00132_exon_4	TACAATTAGGTCCACACGTGTGG	Bomo_Chr1	4213977	4214000
Bm_sgRNA_83189	TGGGCGGCAGCCAACGTTCA	KWMTBOMO00132_exon_4	TGGGCGGCAGCCAACGTTCAGGG	Bomo_Chr1	4214066	4214089
Bm_sgRNA_24839	ATTTTTTACATATTTCAGCA	KWMTBOMO00132_promoter	ATTTTTTACATATTTCAGCAAGG	Bomo_Chr1	4226002	4226025
Bm_sgRNA_06415	AATGAAGTCTCAATTGCTAC	KWMTBOMO00133_exon_1	AATGAAGTCTCAATTGCTACAGG	KWMTBOMO00133_exon_1	641	664
Bm_sgRNA_06580	AATGCGTGGATATCTTTCAT	KWMTBOMO00133_exon_1	AATGCGTGGATATCTTTCATTGG	KWMTBOMO00133_exon_1	952	975
Bm_sgRNA_06823	AATGTGAATACGTCTTCGGC	KWMTBOMO00133_exon_1	AATGTGAATACGTCTTCGGCTGG	KWMTBOMO00133_exon_1	1733	1756
Bm_sgRNA_12027	ACTGCCCGAATATTGGTAGA	KWMTBOMO00133_exon_1	ACTGCCCGAATATTGGTAGATGG	KWMTBOMO00133_exon_1	251	274
Bm_sgRNA_29581	CATATAATTTCTAGGGCCCC	KWMTBOMO00133_exon_1	CATATAATTTCTAGGGCCCCCGG	KWMTBOMO00133_exon_1	614	637
Bm_sgRNA_31986	CCATCACGGCATCGTTCGAA	KWMTBOMO00133_exon_1	CCATCACGGCATCGTTCGAAAGG	KWMTBOMO00133_exon_1	1105	1128
Bm_sgRNA_42396	CTGAGCCGTTGAAATGCAGA	KWMTBOMO00133_exon_1	CTGAGCCGTTGAAATGCAGACGG	KWMTBOMO00133_exon_1	2801	2824
Bm_sgRNA_43461	CTGTGCGAATGAAGAAACAG	KWMTBOMO00133_exon_1	CTGTGCGAATGAAGAAACAGCGG	KWMTBOMO00133_exon_1	1537	1560
Bm_sgRNA_45000	CTTTCGAACGATGCCGTGAT	KWMTBOMO00133_exon_1	CTTTCGAACGATGCCGTGATGGG	KWMTBOMO00133_exon_1	1104	1127
Bm_sgRNA_47777	GACATTGCCACCCACACTGA	KWMTBOMO00133_exon_1	GACATTGCCACCCACACTGACGG	KWMTBOMO00133_exon_1	77	100
Bm_sgRNA_51850	GCAAGAATATGGGACTTAAT	KWMTBOMO00133_exon_1	GCAAGAATATGGGACTTAATGGG	KWMTBOMO00133_exon_1	1811	1834
Bm_sgRNA_52968	GCATCGTAACGGCGCTACTC	KWMTBOMO00133_exon_1	GCATCGTAACGGCGCTACTCTGG	KWMTBOMO00133_exon_1	2133	2156
Bm_sgRNA_71742	TATAGTTTTATCTCCTCGCT	KWMTBOMO00133_exon_1	TATAGTTTTATCTCCTCGCTTGG	KWMTBOMO00133_exon_1	1364	1387
Bm_sgRNA_71935	TATCAGTTATAGCAAGAATA	KWMTBOMO00133_exon_1	TATCAGTTATAGCAAGAATATGG	KWMTBOMO00133_exon_1	1800	1823
Bm_sgRNA_74922	TCATTGCAAGCATCAATGCG	KWMTBOMO00133_exon_1	TCATTGCAAGCATCAATGCGTGG	KWMTBOMO00133_exon_1	938	961
Bm_sgRNA_75584	TCCGAAACAAAGCAAGTGTG	KWMTBOMO00133_exon_1	TCCGAAACAAAGCAAGTGTGCGG	KWMTBOMO00133_exon_1	338	361
Bm_sgRNA_77011	TCGGTATAGACTACTTTGAT	KWMTBOMO00133_exon_1	TCGGTATAGACTACTTTGATTGG	KWMTBOMO00133_exon_1	3341	3364
Bm_sgRNA_81005	TGCAATATTATGGATAATTC	KWMTBOMO00133_exon_1	TGCAATATTATGGATAATTCGGG	KWMTBOMO00133_exon_1	215	238
Bm_sgRNA_84492	TGTCTTGATCTCCGTCAGTG	KWMTBOMO00133_exon_1	TGTCTTGATCTCCGTCAGTGTGG	KWMTBOMO00133_exon_1	88	111
Bm_sgRNA_84551	TGTGAATGTGAATACGTCTT	KWMTBOMO00133_exon_1	TGTGAATGTGAATACGTCTTCGG	KWMTBOMO00133_exon_1	1737	1760
Bm_sgRNA_90796	TTTATTACAAAAGGTGATTC	KWMTBOMO00133_exon_1	TTTATTACAAAAGGTGATTCGGG	KWMTBOMO00133_exon_1	35	58
Bm_sgRNA_01168	AAACTATCAAATCTCTCAGG	KWMTBOMO00135_exon_1	AAACTATCAAATCTCTCAGGTGG	Bomo_Chr1	4283150	4283173
Bm_sgRNA_06181	AATCGATAATAGACGGGTCG	KWMTBOMO00135_exon_1	AATCGATAATAGACGGGTCGAGG	Bomo_Chr1	4282329	4282352
Bm_sgRNA_21911	ATGCCACTGAAGTATGGCAC	KWMTBOMO00135_exon_1	ATGCCACTGAAGTATGGCACAGG	Bomo_Chr1	4283402	4283425
Bm_sgRNA_23818	ATTGAGGGCACACGGTCTGC	KWMTBOMO00135_exon_1	ATTGAGGGCACACGGTCTGCCGG	Bomo_Chr1	4282424	4282447
Bm_sgRNA_54829	GCGCTTCTAGGCTTAGGAAT	KWMTBOMO00135_exon_1	GCGCTTCTAGGCTTAGGAATAGG	Bomo_Chr1	4282121	4282144
Bm_sgRNA_73364	TCAAATCTCTCAGGTGGTGT	KWMTBOMO00135_exon_1	TCAAATCTCTCAGGTGGTGTTGG	Bomo_Chr1	4283144	4283167
Bm_sgRNA_77606	TCTAGGCTTAGGAATAGGCG	KWMTBOMO00135_exon_1	TCTAGGCTTAGGAATAGGCGGGG	Bomo_Chr1	4282116	4282139
Bm_sgRNA_80258	TGAGCGTCGTAACTTGAGGC	KWMTBOMO00135_exon_1	TGAGCGTCGTAACTTGAGGCCGG	Bomo_Chr1	4282443	4282466
Bm_sgRNA_81768	TGCGGAGCTGCTAAGCTTCG	KWMTBOMO00135_exon_1	TGCGGAGCTGCTAAGCTTCGAGG	Bomo_Chr1	4282281	4282304
Bm_sgRNA_89769	TTGGGAGGTACTTTAGTACG	KWMTBOMO00135_exon_1	TTGGGAGGTACTTTAGTACGAGG	Bomo_Chr1	4282187	4282210
Bm_sgRNA_00464	AAAAGCGTGCTGTTGAATTA	KWMTBOMO00135_promoter	AAAAGCGTGCTGTTGAATTAAGG	Bomo_Chr1	4281948	4281971
Bm_sgRNA_25536	CAACAGCACGCTTTTAGTAT	KWMTBOMO00135_promoter	CAACAGCACGCTTTTAGTATAGG	Bomo_Chr1	4281940	4281963
Bm_sgRNA_09548	ACCCCCAACGGGCACTTCAG	KWMTBOMO00136_exon_1	ACCCCCAACGGGCACTTCAGAGG	KWMTBOMO00136_exon_1	2086	2109
Bm_sgRNA_09623	ACCCGTGTCCCAGATATCGA	KWMTBOMO00136_exon_1	ACCCGTGTCCCAGATATCGAGGG	KWMTBOMO00136_exon_1	2420	2443
Bm_sgRNA_10936	ACGGGGGATGCGCGATATAT	KWMTBOMO00136_exon_1	ACGGGGGATGCGCGATATATCGG	KWMTBOMO00136_exon_1	917	940
Bm_sgRNA_15174	AGCCTTCTCTTTCGCGCTGT	KWMTBOMO00136_exon_1	AGCCTTCTCTTTCGCGCTGTGGG	KWMTBOMO00136_exon_1	1750	1773
Bm_sgRNA_16695	AGGTCCCACAGCAGTGATGC	KWMTBOMO00136_exon_1	AGGTCCCACAGCAGTGATGCAGG	KWMTBOMO00136_exon_1	2639	2662
Bm_sgRNA_30809	CATTTGACTCCATACAGAGG	KWMTBOMO00136_exon_1	CATTTGACTCCATACAGAGGAGG	KWMTBOMO00136_exon_1	463	486
Bm_sgRNA_31937	CCATACAGAGGAGGGCCGTT	KWMTBOMO00136_exon_1	CCATACAGAGGAGGGCCGTTCGG	KWMTBOMO00136_exon_1	454	477
Bm_sgRNA_42302	CTGAAGTGGAGAACTCTCTG	KWMTBOMO00136_exon_1	CTGAAGTGGAGAACTCTCTGGGG	KWMTBOMO00136_exon_1	841	864
Bm_sgRNA_44680	CTTGGCAATTACCTTCTTGT	KWMTBOMO00136_exon_1	CTTGGCAATTACCTTCTTGTAGG	KWMTBOMO00136_exon_1	1921	1944
Bm_sgRNA_49345	GAGCTCATTCCATAGCCGGA	KWMTBOMO00136_exon_1	GAGCTCATTCCATAGCCGGATGG	KWMTBOMO00136_exon_1	190	213
Bm_sgRNA_49874	GAGTCCTCAACAGAGCGAAG	KWMTBOMO00136_exon_1	GAGTCCTCAACAGAGCGAAGCGG	KWMTBOMO00136_exon_1	592	615
Bm_sgRNA_50241	GATACTCTCGGAAGGTTGCA	KWMTBOMO00136_exon_1	GATACTCTCGGAAGGTTGCAGGG	KWMTBOMO00136_exon_1	700	723
Bm_sgRNA_63065	GTAGGCCAAGGCGAAATCGT	KWMTBOMO00136_exon_1	GTAGGCCAAGGCGAAATCGTAGG	KWMTBOMO00136_exon_1	2470	2493
Bm_sgRNA_76872	TCGGCCATCAGAGTCTCTCT	KWMTBOMO00136_exon_1	TCGGCCATCAGAGTCTCTCTCGG	KWMTBOMO00136_exon_1	898	921
Bm_sgRNA_81960	TGCTATGCAGATGATAGCAC	KWMTBOMO00136_exon_1	TGCTATGCAGATGATAGCACGGG	KWMTBOMO00136_exon_1	935	958
Bm_sgRNA_82081	TGCTGATCCTGACGTCTGTG	KWMTBOMO00136_exon_1	TGCTGATCCTGACGTCTGTGCGG	KWMTBOMO00136_exon_1	2157	2180
Bm_sgRNA_83193	TGGGCGGTCTTCCATGAAGA	KWMTBOMO00136_exon_1	TGGGCGGTCTTCCATGAAGACGG	KWMTBOMO00136_exon_1	1466	1489
Bm_sgRNA_91838	TTTGGATGGGCGGAGCATCA	KWMTBOMO00136_exon_1	TTTGGATGGGCGGAGCATCACGG	KWMTBOMO00136_exon_1	1083	1106
Bm_sgRNA_08827	ACATAGTACGTGCTCGACCA	KWMTBOMO00136_promoter	ACATAGTACGTGCTCGACCACGG	Bomo_Chr1	4297893	4297916
Bm_sgRNA_64595	GTCTCTACTAAACTCCGCCC	KWMTBOMO00136_promoter	GTCTCTACTAAACTCCGCCCCGG	Bomo_Chr1	4298053	4298076
Bm_sgRNA_77032	TCGGTCTCTCACGCAATCCG	KWMTBOMO00136_promoter	TCGGTCTCTCACGCAATCCGTGG	Bomo_Chr1	4297910	4297933
Bm_sgRNA_89428	TTGCGTGAGAGACCGACGCA	KWMTBOMO00136_promoter	TTGCGTGAGAGACCGACGCAGGG	Bomo_Chr1	4297917	4297940
Bm_sgRNA_04271	AAGATCTATTGGTAGAGTTA	KWMTBOMO00138_exon_1	AAGATCTATTGGTAGAGTTAAGG	Bomo_Chr1	4341314	4341337
Bm_sgRNA_06549	AATGCCCTTTGTACAGCCGG	KWMTBOMO00138_exon_1	AATGCCCTTTGTACAGCCGGGGG	Bomo_Chr1	4340850	4340873
Bm_sgRNA_07027	AATTCAGAAGTTCGTCTTAC	KWMTBOMO00138_exon_1	AATTCAGAAGTTCGTCTTACGGG	Bomo_Chr1	4340599	4340622
Bm_sgRNA_21329	ATCTTAGCACTATTAAACTT	KWMTBOMO00138_exon_1	ATCTTAGCACTATTAAACTTAGG	Bomo_Chr1	4341250	4341273
Bm_sgRNA_34452	CCTGCATCTGCATTTACTTG	KWMTBOMO00138_exon_1	CCTGCATCTGCATTTACTTGTGG	Bomo_Chr1	4340938	4340961
Bm_sgRNA_51543	GATTTAGACCATCAATCCCC	KWMTBOMO00138_exon_1	GATTTAGACCATCAATCCCCCGG	Bomo_Chr1	4340866	4340889
Bm_sgRNA_68964	TAAGGACTATCCTACTTTGA	KWMTBOMO00138_exon_1	TAAGGACTATCCTACTTTGAAGG	Bomo_Chr1	4341296	4341319
Bm_sgRNA_69305	TAATGCCCTTTGTACAGCCG	KWMTBOMO00138_exon_1	TAATGCCCTTTGTACAGCCGGGG	Bomo_Chr1	4340849	4340872
Bm_sgRNA_85800	TTAATGCCCTTTGTACAGCC	KWMTBOMO00138_exon_1	TTAATGCCCTTTGTACAGCCGGG	Bomo_Chr1	4340848	4340871
Bm_sgRNA_86681	TTATCATTATTCTTCTTAGG	KWMTBOMO00138_exon_1	TTATCATTATTCTTCTTAGGAGG	Bomo_Chr1	4341538	4341561
Bm_sgRNA_88298	TTCGTTGTGCATCCAAGACT	KWMTBOMO00138_promoter	TTCGTTGTGCATCCAAGACTTGG	Bomo_Chr1	4341791	4341814
Bm_sgRNA_05783	AATAGTTCCTTGGTAGAGGC	KWMTBOMO00140_exon_1	AATAGTTCCTTGGTAGAGGCGGG	Bomo_Chr1	4397365	4397388
Bm_sgRNA_09233	ACCAAGGAACTATTCTCCTG	KWMTBOMO00140_exon_1	ACCAAGGAACTATTCTCCTGTGG	Bomo_Chr1	4397374	4397397
Bm_sgRNA_15970	AGGACGACCCGCCTCTACCA	KWMTBOMO00140_exon_1	AGGACGACCCGCCTCTACCAAGG	Bomo_Chr1	4397358	4397381
Bm_sgRNA_47058	GAATAGTTCCTTGGTAGAGG	KWMTBOMO00140_exon_1	GAATAGTTCCTTGGTAGAGGCGG	Bomo_Chr1	4397366	4397389
Bm_sgRNA_53257	GCCACAGGAGAATAGTTCCT	KWMTBOMO00140_exon_1	GCCACAGGAGAATAGTTCCTTGG	Bomo_Chr1	4397375	4397398
Bm_sgRNA_57900	GGAGAATAGTTCCTTGGTAG	KWMTBOMO00140_exon_1	GGAGAATAGTTCCTTGGTAGAGG	Bomo_Chr1	4397369	4397392
Bm_sgRNA_67685	GTTTCGTTATTTGAATCTTT	KWMTBOMO00140_exon_1	GTTTCGTTATTTGAATCTTTTGG	Bomo_Chr1	4397257	4397280
Bm_sgRNA_85382	TGTTTTAAAATACAGCGAAA	KWMTBOMO00140_exon_1	TGTTTTAAAATACAGCGAAAAGG	Bomo_Chr1	4397299	4397322
Bm_sgRNA_29138	CAGTGAAGTCGTTGCAATGC	KWMTBOMO00141_exon_1	CAGTGAAGTCGTTGCAATGCTGG	Bomo_Chr1	4410859	4410882
Bm_sgRNA_11499	ACTATGAAATGTTGGCTTCT	KWMTBOMO00141_exon_2	ACTATGAAATGTTGGCTTCTTGG	Bomo_Chr1	4410027	4410050
Bm_sgRNA_19825	ATATTACATCGGCTTCACCC	KWMTBOMO00141_exon_2	ATATTACATCGGCTTCACCCAGG	Bomo_Chr1	4409930	4409953
Bm_sgRNA_43928	CTTCACCCAGGAATCCTGTG	KWMTBOMO00141_exon_2	CTTCACCCAGGAATCCTGTGTGG	Bomo_Chr1	4409942	4409965
Bm_sgRNA_59959	GGCTTCTTGGCAGCAAGATC	KWMTBOMO00141_exon_2	GGCTTCTTGGCAGCAAGATCAGG	Bomo_Chr1	4410040	4410063
Bm_sgRNA_70154	TACGCCCACACAGGATTCCT	KWMTBOMO00141_exon_2	TACGCCCACACAGGATTCCTGGG	Bomo_Chr1	4409947	4409970
Bm_sgRNA_71350	TAGTGAGTATTCATTGTCGC	KWMTBOMO00141_exon_2	TAGTGAGTATTCATTGTCGCAGG	Bomo_Chr1	4409886	4409909
Bm_sgRNA_78616	TCTGTTGCACTATGAAATGT	KWMTBOMO00141_exon_2	TCTGTTGCACTATGAAATGTTGG	Bomo_Chr1	4410019	4410042
Bm_sgRNA_80395	TGAGTATTCATTGTCGCAGG	KWMTBOMO00141_exon_2	TGAGTATTCATTGTCGCAGGTGG	Bomo_Chr1	4409889	4409912
Bm_sgRNA_87186	TTCACCCAGGAATCCTGTGT	KWMTBOMO00141_exon_2	TTCACCCAGGAATCCTGTGTGGG	Bomo_Chr1	4409943	4409966
Bm_sgRNA_44003	CTTCATAAAAGGATTAGCTA	KWMTBOMO00141_promoter	CTTCATAAAAGGATTAGCTACGG	Bomo_Chr1	4410988	4411011
Bm_sgRNA_44029	CTTCATCTTAGCTTCATAAA	KWMTBOMO00141_promoter	CTTCATCTTAGCTTCATAAAAGG	Bomo_Chr1	4410977	4411000
Bm_sgRNA_87358	TTCATAAAAGGATTAGCTAC	KWMTBOMO00141_promoter	TTCATAAAAGGATTAGCTACGGG	Bomo_Chr1	4410989	4411012
Bm_sgRNA_06281	AATCTATCGGATGCTTCTCG	KWMTBOMO00143_exon_1	AATCTATCGGATGCTTCTCGTGG	Bomo_Chr1	4513409	4513432
Bm_sgRNA_10724	ACGCTGGACCGATGCAGCCA	KWMTBOMO00143_exon_1	ACGCTGGACCGATGCAGCCAGGG	Bomo_Chr1	4513380	4513403
Bm_sgRNA_21127	ATCTATCGGATGCTTCTCGT	KWMTBOMO00143_exon_1	ATCTATCGGATGCTTCTCGTGGG	Bomo_Chr1	4513408	4513431
Bm_sgRNA_27482	CACGCTGGACCGATGCAGCC	KWMTBOMO00143_exon_1	CACGCTGGACCGATGCAGCCAGG	Bomo_Chr1	4513379	4513402
Bm_sgRNA_56789	GCTTCTCGTGGGGTCAACCC	KWMTBOMO00143_exon_1	GCTTCTCGTGGGGTCAACCCTGG	Bomo_Chr1	4513397	4513420
Bm_sgRNA_60636	GGGGTCAACCCTGGCTGCAT	KWMTBOMO00143_exon_1	GGGGTCAACCCTGGCTGCATCGG	Bomo_Chr1	4513388	4513411
Bm_sgRNA_89069	TTGATAATCTTCGATACACT	KWMTBOMO00143_exon_1	TTGATAATCTTCGATACACTTGG	Bomo_Chr1	4513224	4513247
Bm_sgRNA_89663	TTGGCAACAGCTGCAGGCGA	KWMTBOMO00143_exon_1	TTGGCAACAGCTGCAGGCGACGG	Bomo_Chr1	4513243	4513266
Bm_sgRNA_48399	GACGTTAAATAAATTAACGT	KWMTBOMO00143_promoter	GACGTTAAATAAATTAACGTTGG	Bomo_Chr1	4513134	4513157
Bm_sgRNA_05337	AAGTTCCAGGAATTTGTTAT	KWMTBOMO00144_exon_1	AAGTTCCAGGAATTTGTTATTGG	Bomo_Chr1	4640877	4640900
Bm_sgRNA_05635	AATACGTCAATCCACAGATC	KWMTBOMO00144_exon_1	AATACGTCAATCCACAGATCGGG	Bomo_Chr1	4640769	4640792
Bm_sgRNA_05886	AATATGGACAAGAGACGCGG	KWMTBOMO00144_exon_1	AATATGGACAAGAGACGCGGAGG	Bomo_Chr1	4640809	4640832
Bm_sgRNA_09006	ACATGATCTTCTTGTCTTGA	KWMTBOMO00144_exon_1	ACATGATCTTCTTGTCTTGACGG	Bomo_Chr1	4640848	4640871
Bm_sgRNA_20525	ATCCCTAAAAGCCCGATCTG	KWMTBOMO00144_exon_1	ATCCCTAAAAGCCCGATCTGTGG	Bomo_Chr1	4640780	4640803
Bm_sgRNA_30195	CATGATCTTCTTGTCTTGAC	KWMTBOMO00144_exon_1	CATGATCTTCTTGTCTTGACGGG	Bomo_Chr1	4640847	4640870
Bm_sgRNA_78025	TCTCGTCGTCTGATCTATGA	KWMTBOMO00144_exon_1	TCTCGTCGTCTGATCTATGAGGG	Bomo_Chr1	4640907	4640930
Bm_sgRNA_80349	TGAGGGTGTTAAGAAGTTCC	KWMTBOMO00144_exon_1	TGAGGGTGTTAAGAAGTTCCAGG	Bomo_Chr1	4640890	4640913
Bm_sgRNA_80506	TGATACCAATAACAAATTCC	KWMTBOMO00144_exon_1	TGATACCAATAACAAATTCCTGG	Bomo_Chr1	4640872	4640895
Bm_sgRNA_03897	AAGAAACAGGTGGATTTGTC	KWMTBOMO00145_exon_1	AAGAAACAGGTGGATTTGTCTGG	Bomo_Chr1	4651326	4651349
Bm_sgRNA_53294	GCCACTAAAGATATGAACAG	KWMTBOMO00145_exon_1	GCCACTAAAGATATGAACAGGGG	Bomo_Chr1	4651242	4651265
Bm_sgRNA_53574	GCCCCTGTTCATATCTTTAG	KWMTBOMO00145_exon_1	GCCCCTGTTCATATCTTTAGTGG	Bomo_Chr1	4651241	4651264
Bm_sgRNA_59022	GGCCACTAAAGATATGAACA	KWMTBOMO00145_exon_1	GGCCACTAAAGATATGAACAGGG	Bomo_Chr1	4651243	4651266
Bm_sgRNA_92302	TTTTCAAAATCCATGGTGGA	KWMTBOMO00145_exon_1	TTTTCAAAATCCATGGTGGATGG	Bomo_Chr1	4651358	4651381
Bm_sgRNA_19630	ATATCAGGGTTTAGGAGTGT	KWMTBOMO00146_exon_1	ATATCAGGGTTTAGGAGTGTCGG	Bomo_Chr1	4667379	4667402
Bm_sgRNA_01325	AAAGAAGGGTCCAAAGAAAG	KWMTBOMO00146_exon_2	AAAGAAGGGTCCAAAGAAAGAGG	Bomo_Chr1	4667225	4667248
Bm_sgRNA_01409	AAAGAGGATGAAGCAAGCTA	KWMTBOMO00146_exon_2	AAAGAGGATGAAGCAAGCTATGG	Bomo_Chr1	4667209	4667232
Bm_sgRNA_44638	CTTGCTTCATCCTCTTTCTT	KWMTBOMO00146_exon_2	CTTGCTTCATCCTCTTTCTTTGG	Bomo_Chr1	4667215	4667238
Bm_sgRNA_92043	TTTGTCTTCTGATATCTGTT	KWMTBOMO00146_exon_2	TTTGTCTTCTGATATCTGTTTGG	Bomo_Chr1	4667082	4667105
Bm_sgRNA_03189	AACGAAGACGAAAATGGTAT	KWMTBOMO00147_exon_2	AACGAAGACGAAAATGGTATCGG	Bomo_Chr1	4679752	4679775
Bm_sgRNA_03949	AAGAAGAAGGAGCAAGCTAG	KWMTBOMO00147_exon_2	AAGAAGAAGGAGCAAGCTAGCGG	Bomo_Chr1	4679806	4679829
Bm_sgRNA_38943	CGTCAGCTCACGGTCTTCCC	KWMTBOMO00147_exon_2	CGTCAGCTCACGGTCTTCCCTGG	Bomo_Chr1	4679715	4679738
Bm_sgRNA_53681	GCCCTTTTCTTCGCGTCCGA	KWMTBOMO00147_exon_2	GCCCTTTTCTTCGCGTCCGACGG	Bomo_Chr1	4679836	4679859
Bm_sgRNA_70959	TAGCGGCAGAAACAAGAAGC	KWMTBOMO00147_exon_2	TAGCGGCAGAAACAAGAAGCCGG	Bomo_Chr1	4679789	4679812
Bm_sgRNA_76779	TCGGAACTAATGGTATATCC	KWMTBOMO00147_exon_2	TCGGAACTAATGGTATATCCAGG	Bomo_Chr1	4679733	4679756
Bm_sgRNA_02701	AACACTTTTAGTCTGTCCAG	KWMTBOMO00148_exon_2	AACACTTTTAGTCTGTCCAGTGG	Bomo_Chr1	4690484	4690507
Bm_sgRNA_28735	CAGGACCTGCACGGCTCCAC	KWMTBOMO00148_exon_2	CAGGACCTGCACGGCTCCACTGG	Bomo_Chr1	4690500	4690523
Bm_sgRNA_36608	CGCAGTCAGCAGGACCTGCA	KWMTBOMO00148_exon_2	CGCAGTCAGCAGGACCTGCACGG	Bomo_Chr1	4690509	4690532
Bm_sgRNA_52882	GCATAGCGGGCGCAGTCAGC	KWMTBOMO00148_exon_2	GCATAGCGGGCGCAGTCAGCAGG	Bomo_Chr1	4690519	4690542
Bm_sgRNA_74050	TCACTCTGTGTGAAGTCATC	KWMTBOMO00148_exon_2	TCACTCTGTGTGAAGTCATCGGG	Bomo_Chr1	4690583	4690606
Bm_sgRNA_78557	TCTGTCCAGTGGAGCCGTGC	KWMTBOMO00148_exon_2	TCTGTCCAGTGGAGCCGTGCAGG	Bomo_Chr1	4690495	4690518
Bm_sgRNA_60300	GGGCCATCGACGGGCTATGT	KWMTBOMO00148_promoter	GGGCCATCGACGGGCTATGTTGG	Bomo_Chr1	4691295	4691318
Bm_sgRNA_61279	GGTCATTTCTCTACCGGACA	KWMTBOMO00148_promoter	GGTCATTTCTCTACCGGACACGG	Bomo_Chr1	4691316	4691339
Bm_sgRNA_73942	TCACGCAAAGGGCCATCGAC	KWMTBOMO00148_promoter	TCACGCAAAGGGCCATCGACGGG	Bomo_Chr1	4691286	4691309
Bm_sgRNA_28385	CAGCATTTGAGGATCCTGCG	KWMTBOMO00149_exon_1	CAGCATTTGAGGATCCTGCGTGG	Bomo_Chr1	4695500	4695523
Bm_sgRNA_45339	GAAAAATGTGTCAAATTTCG	KWMTBOMO00149_exon_1	GAAAAATGTGTCAAATTTCGCGG	Bomo_Chr1	4696074	4696097
Bm_sgRNA_57140	GGAAAGTATAGAAATCATTA	KWMTBOMO00149_exon_1	GGAAAGTATAGAAATCATTAGGG	Bomo_Chr1	4695917	4695940
Bm_sgRNA_78936	TCTTGGGTGACTGCAGTTTT	KWMTBOMO00149_exon_1	TCTTGGGTGACTGCAGTTTTTGG	Bomo_Chr1	4695261	4695284
Bm_sgRNA_19355	ATAGCTGCGATTGATGTGGG	KWMTBOMO00150_exon_1	ATAGCTGCGATTGATGTGGGGGG	Bomo_Chr1	4742425	4742448
Bm_sgRNA_29538	CATAGCTGCGATTGATGTGG	KWMTBOMO00150_exon_1	CATAGCTGCGATTGATGTGGGGG	Bomo_Chr1	4742424	4742447
Bm_sgRNA_42624	CTGCATAGCTGCGATTGATG	KWMTBOMO00150_exon_1	CTGCATAGCTGCGATTGATGTGG	Bomo_Chr1	4742421	4742444
Bm_sgRNA_52883	GCATAGCTGCGATTGATGTG	KWMTBOMO00150_exon_1	GCATAGCTGCGATTGATGTGGGG	Bomo_Chr1	4742423	4742446
Bm_sgRNA_60961	GGTACAGTGTCATCCGCCGT	KWMTBOMO00150_exon_1	GGTACAGTGTCATCCGCCGTTGG	Bomo_Chr1	4742568	4742591
Bm_sgRNA_64686	GTCTGTCGCCCTCAAGGAGC	KWMTBOMO00150_exon_1	GTCTGTCGCCCTCAAGGAGCTGG	Bomo_Chr1	4742448	4742471
Bm_sgRNA_72933	TATTGCATGAGTATTCGTGT	KWMTBOMO00150_exon_1	TATTGCATGAGTATTCGTGTGGG	Bomo_Chr1	4742642	4742665
Bm_sgRNA_72193	TATCTCTGTGTGCGGCAGTG	KWMTBOMO00150_promoter	TATCTCTGTGTGCGGCAGTGCGG	Bomo_Chr1	4742761	4742784
Bm_sgRNA_91752	TTTGCGCGTATCTCTGTGTG	KWMTBOMO00150_promoter	TTTGCGCGTATCTCTGTGTGCGG	Bomo_Chr1	4742769	4742792
Bm_sgRNA_10077	ACCTGCAAGGCACGCAACCC	KWMTBOMO00151_exon_2	ACCTGCAAGGCACGCAACCCTGG	Bomo_Chr1	4750966	4750989
Bm_sgRNA_35602	CGACGAGTGATCGCGGCACA	KWMTBOMO00151_exon_2	CGACGAGTGATCGCGGCACACGG	Bomo_Chr1	4751067	4751090
Bm_sgRNA_39543	CGTGTGCCGCGATCACTCGT	KWMTBOMO00151_exon_2	CGTGTGCCGCGATCACTCGTCGG	Bomo_Chr1	4751066	4751089
Bm_sgRNA_56952	GCTTTCCCGACGAGTGATCG	KWMTBOMO00151_exon_2	GCTTTCCCGACGAGTGATCGCGG	Bomo_Chr1	4751060	4751083
Bm_sgRNA_65279	GTGCCTTGCAGGTGTAGCGA	KWMTBOMO00151_exon_2	GTGCCTTGCAGGTGTAGCGACGG	Bomo_Chr1	4750976	4750999
Bm_sgRNA_71856	TATCAACCACACACCCGCCA	KWMTBOMO00151_exon_2	TATCAACCACACACCCGCCAGGG	Bomo_Chr1	4750949	4750972
Bm_sgRNA_91709	TTTGCATGTGACGGGTGCGC	KWMTBOMO00151_exon_2	TTTGCATGTGACGGGTGCGCTGG	Bomo_Chr1	4751026	4751049
Bm_sgRNA_38357	CGGGTACGGATGTTGGAATA	KWMTBOMO00151_exon_3	CGGGTACGGATGTTGGAATAAGG	Bomo_Chr1	4750614	4750637
Bm_sgRNA_56547	GCTGTGATAGGTGGAGGCGA	KWMTBOMO00151_exon_3	GCTGTGATAGGTGGAGGCGAAGG	Bomo_Chr1	4750537	4750560
Bm_sgRNA_69372	TAATGTTCGTTTTGGTGTAT	KWMTBOMO00151_promoter	TAATGTTCGTTTTGGTGTATCGG	Bomo_Chr1	4751744	4751767
Bm_sgRNA_92580	TTTTGGTGTATCGGTAATAT	KWMTBOMO00151_promoter	TTTTGGTGTATCGGTAATATTGG	Bomo_Chr1	4751735	4751758
Bm_sgRNA_37304	CGCGTTACGGGACCATGATC	KWMTBOMO00152_exon_1	CGCGTTACGGGACCATGATCGGG	Bomo_Chr1	4784679	4784702
Bm_sgRNA_44106	CTTCCGCCTTATCCCTCTCG	KWMTBOMO00152_exon_1	CTTCCGCCTTATCCCTCTCGTGG	Bomo_Chr1	4784647	4784670
Bm_sgRNA_46921	GAAGTGAAAGTGGCGGTGAT	KWMTBOMO00152_exon_1	GAAGTGAAAGTGGCGGTGATCGG	Bomo_Chr1	4784609	4784632
Bm_sgRNA_64131	GTCGAATGCTGCCCGTGGAA	KWMTBOMO00152_exon_1	GTCGAATGCTGCCCGTGGAACGG	Bomo_Chr1	4784707	4784730
Bm_sgRNA_64485	GTCGTTATCAGAAGTGAAAG	KWMTBOMO00152_exon_1	GTCGTTATCAGAAGTGAAAGTGG	Bomo_Chr1	4784619	4784642
Bm_sgRNA_65059	GTGATCGGTGCGCCCTCAGT	KWMTBOMO00152_exon_1	GTGATCGGTGCGCCCTCAGTCGG	Bomo_Chr1	4784594	4784617
Bm_sgRNA_66464	GTTATCAGAAGTGAAAGTGG	KWMTBOMO00152_exon_1	GTTATCAGAAGTGAAAGTGGCGG	Bomo_Chr1	4784616	4784639
Bm_sgRNA_84210	TGTCCACGAGAGGGATAAGG	KWMTBOMO00152_exon_1	TGTCCACGAGAGGGATAAGGCGG	Bomo_Chr1	4784650	4784673
Bm_sgRNA_34073	CCTCACGAAGCGGTACATCG	KWMTBOMO00152_exon_2	CCTCACGAAGCGGTACATCGGGG	Bomo_Chr1	4768398	4768421
Bm_sgRNA_38586	CGGTTCGCTTCCTCACGAAG	KWMTBOMO00152_exon_2	CGGTTCGCTTCCTCACGAAGCGG	Bomo_Chr1	4768408	4768431
Bm_sgRNA_87760	TTCCTCACGAAGCGGTACAT	KWMTBOMO00152_exon_2	TTCCTCACGAAGCGGTACATCGG	Bomo_Chr1	4768400	4768423
Bm_sgRNA_00861	AAACACGAGGCGTTGCTAGA	KWMTBOMO00152_exon_3	AAACACGAGGCGTTGCTAGACGG	Bomo_Chr1	4768240	4768263
Bm_sgRNA_77465	TCTAATATTTCGAAAAGTAT	KWMTBOMO00152_exon_3	TCTAATATTTCGAAAAGTATGGG	Bomo_Chr1	4768213	4768236
Bm_sgRNA_34039	CCTATTTGCAAGACTGATCT	KWMTBOMO00152_promoter	CCTATTTGCAAGACTGATCTTGG	Bomo_Chr1	4784834	4784857
Bm_sgRNA_01219	AAACTGAAGCCACAACCATC	KWMTBOMO00153_exon_1	AAACTGAAGCCACAACCATCAGG	Bomo_Chr1	4808093	4808116
Bm_sgRNA_03849	AACTTTCCTGTACATCCTGA	KWMTBOMO00153_exon_1	AACTTTCCTGTACATCCTGATGG	Bomo_Chr1	4808108	4808131
Bm_sgRNA_31235	CCACAACCATCAGGATGTAC	KWMTBOMO00153_exon_1	CCACAACCATCAGGATGTACAGG	Bomo_Chr1	4808102	4808125
Bm_sgRNA_34607	CCTGTACATCCTGATGGTTG	KWMTBOMO00153_exon_1	CCTGTACATCCTGATGGTTGTGG	Bomo_Chr1	4808102	4808125
Bm_sgRNA_12691	ACTTTCGGATTCCTTGAGCG	KWMTBOMO00153_exon_2	ACTTTCGGATTCCTTGAGCGTGG	Bomo_Chr1	4804859	4804882
Bm_sgRNA_50988	GATGCCTTCAGGACCTTTCG	KWMTBOMO00153_exon_2	GATGCCTTCAGGACCTTTCGGGG	Bomo_Chr1	4804806	4804829
Bm_sgRNA_05750	AATAGGCATACACATAGATT	KWMTBOMO00153_promoter	AATAGGCATACACATAGATTAGG	Bomo_Chr1	4808279	4808302
Bm_sgRNA_29433	CATACACATAGATTAGGTAC	KWMTBOMO00153_promoter	CATACACATAGATTAGGTACAGG	Bomo_Chr1	4808285	4808308
Bm_sgRNA_84003	TGTATGCCTATTGCACTGAA	KWMTBOMO00153_promoter	TGTATGCCTATTGCACTGAATGG	Bomo_Chr1	4808268	4808291
Bm_sgRNA_05065	AAGTAAATCTTGTAGAGTCG	KWMTBOMO00154_exon_2	AAGTAAATCTTGTAGAGTCGAGG	Bomo_Chr1	4810624	4810647
Bm_sgRNA_41908	CTCTACAAGATTTACTTCGA	KWMTBOMO00154_exon_2	CTCTACAAGATTTACTTCGATGG	Bomo_Chr1	4810630	4810653
Bm_sgRNA_61427	GGTCTACTGTGGCTAGAATG	KWMTBOMO00154_exon_2	GGTCTACTGTGGCTAGAATGAGG	Bomo_Chr1	4810577	4810600
Bm_sgRNA_82971	TGGCTAGAATGAGGCGTATG	KWMTBOMO00154_exon_2	TGGCTAGAATGAGGCGTATGTGG	Bomo_Chr1	4810586	4810609
Bm_sgRNA_26452	CAATCTTTTCAACTCCGACC	KWMTBOMO00154_exon_3	CAATCTTTTCAACTCCGACCGGG	Bomo_Chr1	4813622	4813645
Bm_sgRNA_33597	CCGGTCGGAGTTGAAAAGAT	KWMTBOMO00154_exon_3	CCGGTCGGAGTTGAAAAGATTGG	Bomo_Chr1	4813623	4813646
Bm_sgRNA_26387	CAATATTACTCTGCTTATAA	KWMTBOMO00154_promoter	CAATATTACTCTGCTTATAACGG	Bomo_Chr1	4810400	4810423
Bm_sgRNA_85353	TGTTTGCGACGGTCGATATG	KWMTBOMO00154_promoter	TGTTTGCGACGGTCGATATGAGG	Bomo_Chr1	4810289	4810312
Bm_sgRNA_14371	AGATGTAATCGAAAGAGCAG	KWMTBOMO00155_exon_2	AGATGTAATCGAAAGAGCAGTGG	Bomo_Chr1	4822092	4822115
Bm_sgRNA_14927	AGCCAGTACAAAGATGCAGC	KWMTBOMO00155_exon_2	AGCCAGTACAAAGATGCAGCAGG	Bomo_Chr1	4821966	4821989
Bm_sgRNA_25466	CAACAACTAGCCGTAAGCCA	KWMTBOMO00155_exon_2	CAACAACTAGCCGTAAGCCACGG	Bomo_Chr1	4821942	4821965
Bm_sgRNA_74770	TCATCTTTCTCAATTCTGGA	KWMTBOMO00155_exon_2	TCATCTTTCTCAATTCTGGATGG	Bomo_Chr1	4822336	4822359
Bm_sgRNA_77515	TCTACCTTGCCTTCGATATC	KWMTBOMO00155_exon_2	TCTACCTTGCCTTCGATATCAGG	Bomo_Chr1	4822168	4822191
Bm_sgRNA_79117	TCTTTTGCAGTATCAGCACT	KWMTBOMO00155_exon_2	TCTTTTGCAGTATCAGCACTAGG	Bomo_Chr1	4822072	4822095
Bm_sgRNA_09310	ACCAGAAGCTCAGCTCTGCT	KWMTBOMO00156_exon_4	ACCAGAAGCTCAGCTCTGCTAGG	Bomo_Chr1	4860078	4860101
Bm_sgRNA_28133	CAGAGCTGAGCTTCTGGTGT	KWMTBOMO00156_exon_4	CAGAGCTGAGCTTCTGGTGTCGG	Bomo_Chr1	4860083	4860106
Bm_sgRNA_44026	CTTCATCGGTGATGTGCTGT	KWMTBOMO00156_exon_4	CTTCATCGGTGATGTGCTGTTGG	Bomo_Chr1	4860116	4860139
Bm_sgRNA_47302	GAATGTGTGGCGCACGGTGC	KWMTBOMO00156_exon_4	GAATGTGTGGCGCACGGTGCTGG	Bomo_Chr1	4860188	4860211
Bm_sgRNA_65476	GTGCTGTTGGAACACTTCGA	KWMTBOMO00156_exon_4	GTGCTGTTGGAACACTTCGACGG	Bomo_Chr1	4860129	4860152
Bm_sgRNA_76815	TCGGAGCAGCTTCGCTTCAT	KWMTBOMO00156_exon_4	TCGGAGCAGCTTCGCTTCATCGG	Bomo_Chr1	4860102	4860125
Bm_sgRNA_00494	AAAAGGGCGACAGTGACGCG	KWMTBOMO00157_exon_1	AAAAGGGCGACAGTGACGCGCGG	Bomo_Chr1	4985192	4985215
Bm_sgRNA_08581	ACAGGACGTAGCTGCCAGAG	KWMTBOMO00157_exon_1	ACAGGACGTAGCTGCCAGAGAGG	Bomo_Chr1	4985123	4985146
Bm_sgRNA_15688	AGCTGCCAGAGAGGATCCTC	KWMTBOMO00157_exon_1	AGCTGCCAGAGAGGATCCTCTGG	Bomo_Chr1	4985132	4985155
Bm_sgRNA_27620	CACGTCTAAGCGCCGCAGGA	KWMTBOMO00157_exon_1	CACGTCTAAGCGCCGCAGGATGG	Bomo_Chr1	4985157	4985180
Bm_sgRNA_42764	CTGCGGCGCTTAGACGTGCT	KWMTBOMO00157_exon_1	CTGCGGCGCTTAGACGTGCTGGG	Bomo_Chr1	4985162	4985185
Bm_sgRNA_54650	GCGCCGCAGGATGGAACCAG	KWMTBOMO00157_exon_1	GCGCCGCAGGATGGAACCAGAGG	Bomo_Chr1	4985148	4985171
Bm_sgRNA_77460	TCTAAGTGCAAAGCTGTAGT	KWMTBOMO00157_exon_1	TCTAAGTGCAAAGCTGTAGTAGG	Bomo_Chr1	4985270	4985293
Bm_sgRNA_12682	ACTTTCCTGCTTTCAGGTAT	KWMTBOMO00157_promoter	ACTTTCCTGCTTTCAGGTATTGG	Bomo_Chr1	4985359	4985382
Bm_sgRNA_39661	CGTTCCCAATACCTGAAAGC	KWMTBOMO00157_promoter	CGTTCCCAATACCTGAAAGCAGG	Bomo_Chr1	4985354	4985377
Bm_sgRNA_02983	AACCACCTCTCTCGTGGTTG	KWMTBOMO00158_exon_3	AACCACCTCTCTCGTGGTTGTGG	Bomo_Chr1	5006704	5006727
Bm_sgRNA_32590	CCCGCAATAAGTGTGAAATT	KWMTBOMO00158_exon_3	CCCGCAATAAGTGTGAAATTCGG	Bomo_Chr1	5006579	5006602
Bm_sgRNA_56949	GCTTTCCACAACCACGAGAG	KWMTBOMO00158_exon_3	GCTTTCCACAACCACGAGAGAGG	Bomo_Chr1	5006699	5006722
Bm_sgRNA_65989	GTGTCGTATGGCAAATGTTG	KWMTBOMO00158_exon_3	GTGTCGTATGGCAAATGTTGAGG	Bomo_Chr1	5006602	5006625
Bm_sgRNA_66279	GTTACACCAGTATATAAGTT	KWMTBOMO00158_exon_3	GTTACACCAGTATATAAGTTTGG	Bomo_Chr1	5006523	5006546
Bm_sgRNA_87536	TTCCACAACCACGAGAGAGG	KWMTBOMO00158_exon_3	TTCCACAACCACGAGAGAGGTGG	Bomo_Chr1	5006702	5006725
Bm_sgRNA_61828	GGTGGTTGCCATGATTTATC	KWMTBOMO00159_exon_1	GGTGGTTGCCATGATTTATCCGG	Bomo_Chr1	5023372	5023395
Bm_sgRNA_67610	GTTTCAATTACAACAACGGG	KWMTBOMO00159_exon_1	GTTTCAATTACAACAACGGGTGG	Bomo_Chr1	5023390	5023413
Bm_sgRNA_55765	GCTCCAACACAATGGCTTGA	KWMTBOMO00159_exon_2	GCTCCAACACAATGGCTTGATGG	Bomo_Chr1	5028476	5028499
Bm_sgRNA_02646	AACACATTCTGTATTATCTA	KWMTBOMO00159_promoter	AACACATTCTGTATTATCTATGG	Bomo_Chr1	5023177	5023200
Bm_sgRNA_10690	ACGCTATTTAATATCTATGT	KWMTBOMO00159_promoter	ACGCTATTTAATATCTATGTAGG	Bomo_Chr1	5023267	5023290
Bm_sgRNA_40765	CTATCGTTTTACATTTCAGA	KWMTBOMO00159_promoter	CTATCGTTTTACATTTCAGAAGG	Bomo_Chr1	5023149	5023172
Bm_sgRNA_62536	GTAATGCGTTTCGGCTTAAA	KWMTBOMO00159_promoter	GTAATGCGTTTCGGCTTAAAGGG	Bomo_Chr1	5022886	5022909
Bm_sgRNA_04111	AAGAGAACGCGTTCTTCTAC	KWMTBOMO00160_exon_1	AAGAGAACGCGTTCTTCTACTGG	Bomo_Chr1	5033972	5033995
Bm_sgRNA_14398	AGATTAAATGCTGTGCTCAA	KWMTBOMO00160_exon_1	AGATTAAATGCTGTGCTCAACGG	Bomo_Chr1	5033799	5033822
Bm_sgRNA_25442	CAAATTTTCACGGCTCTTTG	KWMTBOMO00160_exon_1	CAAATTTTCACGGCTCTTTGTGG	Bomo_Chr1	5033767	5033790
Bm_sgRNA_72543	TATGGTGTTTTCAAGAAGCA	KWMTBOMO00160_exon_1	TATGGTGTTTTCAAGAAGCAAGG	Bomo_Chr1	5033947	5033970
Bm_sgRNA_82680	TGGCAAAAACGTGACAAACA	KWMTBOMO00160_exon_1	TGGCAAAAACGTGACAAACATGG	Bomo_Chr1	5033838	5033861
Bm_sgRNA_03026	AACCATTTAGTAATGGTACT	KWMTBOMO00160_exon_2	AACCATTTAGTAATGGTACTTGG	Bomo_Chr1	5040488	5040511
Bm_sgRNA_06825	AATGTGACAGCAAGAATGTC	KWMTBOMO00160_exon_2	AATGTGACAGCAAGAATGTCAGG	Bomo_Chr1	5040458	5040481
Bm_sgRNA_32111	CCATTAGCATTTGACGTACT	KWMTBOMO00160_exon_2	CCATTAGCATTTGACGTACTAGG	Bomo_Chr1	5040518	5040541
Bm_sgRNA_33985	CCTAGTACGTCAAATGCTAA	KWMTBOMO00160_exon_2	CCTAGTACGTCAAATGCTAATGG	Bomo_Chr1	5040518	5040541
Bm_sgRNA_70387	TACTCAGGACGAACCGTGTA	KWMTBOMO00160_exon_4	TACTCAGGACGAACCGTGTATGG	Bomo_Chr1	5042442	5042465
Bm_sgRNA_91204	TTTCGCTTCCGCCAATGGAG	KWMTBOMO00160_exon_4	TTTCGCTTCCGCCAATGGAGAGG	Bomo_Chr1	5042602	5042625
Bm_sgRNA_47296	GAATGTGCAGTTCTTGAGTT	KWMTBOMO00160_exon_5	GAATGTGCAGTTCTTGAGTTCGG	Bomo_Chr1	5043129	5043152
Bm_sgRNA_67262	GTTGGATAAGGGCTAAACTC	KWMTBOMO00160_exon_5	GTTGGATAAGGGCTAAACTCTGG	Bomo_Chr1	5043250	5043273
Bm_sgRNA_09595	ACCCGCACCAGTTGTATCTG	KWMTBOMO00160_exon_7	ACCCGCACCAGTTGTATCTGAGG	Bomo_Chr1	5044307	5044330
Bm_sgRNA_15619	AGCTCGGAGGCGGTTTTGGC	KWMTBOMO00161_exon_1	AGCTCGGAGGCGGTTTTGGCGGG	KWMTBOMO00161_exon_1	323	346
Bm_sgRNA_19058	ATACGGTGCACAGAATTTAC	KWMTBOMO00161_exon_1	ATACGGTGCACAGAATTTACTGG	KWMTBOMO00161_exon_1	708	731
Bm_sgRNA_24904	CAAAACCGCCTCCGAGCTTC	KWMTBOMO00161_exon_1	CAAAACCGCCTCCGAGCTTCCGG	KWMTBOMO00161_exon_1	318	341
Bm_sgRNA_34215	CCTCGCCCCCGCCTCATCGA	KWMTBOMO00161_exon_1	CCTCGCCCCCGCCTCATCGACGG	KWMTBOMO00161_exon_1	1195	1218
Bm_sgRNA_36433	CGATTTATTTTAGGGGCTCG	KWMTBOMO00161_exon_1	CGATTTATTTTAGGGGCTCGGGG	KWMTBOMO00161_exon_1	354	377
Bm_sgRNA_42293	CTGAAGGATAACCGGGGGAG	KWMTBOMO00161_exon_1	CTGAAGGATAACCGGGGGAGGGG	KWMTBOMO00161_exon_1	998	1021
Bm_sgRNA_44462	CTTGAAGGCCAGAAACTCTG	KWMTBOMO00161_exon_1	CTTGAAGGCCAGAAACTCTGAGG	KWMTBOMO00161_exon_1	1508	1531
Bm_sgRNA_46226	GAACTCCGCGTTGTAATACG	KWMTBOMO00161_exon_1	GAACTCCGCGTTGTAATACGCGG	KWMTBOMO00161_exon_1	789	812
Bm_sgRNA_48219	GACGCGGCGACGGAGTGGCA	KWMTBOMO00161_exon_1	GACGCGGCGACGGAGTGGCACGG	KWMTBOMO00161_exon_1	1045	1068
Bm_sgRNA_51843	GCAACTTTTCTCGCCAGTAT	KWMTBOMO00161_exon_1	GCAACTTTTCTCGCCAGTATAGG	KWMTBOMO00161_exon_1	1359	1382
Bm_sgRNA_52260	GCACGGGCTGGGGGCGCAAC	KWMTBOMO00161_exon_1	GCACGGGCTGGGGGCGCAACGGG	KWMTBOMO00161_exon_1	1062	1085
Bm_sgRNA_55105	GCGGTCGGAGGGCAAGTCGC	KWMTBOMO00161_exon_1	GCGGTCGGAGGGCAAGTCGCGGG	KWMTBOMO00161_exon_1	132	155
Bm_sgRNA_55138	GCGGTTCCGTCGCGGTTTTT	KWMTBOMO00161_exon_1	GCGGTTCCGTCGCGGTTTTTTGG	KWMTBOMO00161_exon_1	430	453
Bm_sgRNA_58198	GGAGGGCAAGTCGCGGGAGA	KWMTBOMO00161_exon_1	GGAGGGCAAGTCGCGGGAGAGGG	KWMTBOMO00161_exon_1	138	161
Bm_sgRNA_58844	GGCAGGCACGACAGAGGCTG	KWMTBOMO00161_exon_1	GGCAGGCACGACAGAGGCTGCGG	KWMTBOMO00161_exon_1	1394	1417
Bm_sgRNA_59564	GGCGGCGGTGCCCAGTGTGT	KWMTBOMO00161_exon_1	GGCGGCGGTGCCCAGTGTGTCGG	KWMTBOMO00161_exon_1	238	261
Bm_sgRNA_61632	GGTGCACAGAATTTACTGGT	KWMTBOMO00161_exon_1	GGTGCACAGAATTTACTGGTAGG	KWMTBOMO00161_exon_1	712	735
Bm_sgRNA_61656	GGTGCCCAGTGTGTCGGCCT	KWMTBOMO00161_exon_1	GGTGCCCAGTGTGTCGGCCTGGG	KWMTBOMO00161_exon_1	232	255
Bm_sgRNA_63340	GTATGCACACCGGTCGCGGT	KWMTBOMO00161_exon_1	GTATGCACACCGGTCGCGGTAGG	KWMTBOMO00161_exon_1	689	712
Bm_sgRNA_92523	TTTTGCCCAGGCCGACACAC	KWMTBOMO00161_exon_1	TTTTGCCCAGGCCGACACACTGG	KWMTBOMO00161_exon_1	227	250
Bm_sgRNA_04801	AAGGAGTTCCCTAATATCGT	KWMTBOMO00161_exon_2	AAGGAGTTCCCTAATATCGTCGG	KWMTBOMO00161_exon_2	177	200
Bm_sgRNA_08864	ACATCACCTCGACATTAGAT	KWMTBOMO00161_exon_2	ACATCACCTCGACATTAGATAGG	KWMTBOMO00161_exon_2	249	272
Bm_sgRNA_34201	CCTCGATACGCGCCTACGAC	KWMTBOMO00161_exon_2	CCTCGATACGCGCCTACGACAGG	KWMTBOMO00161_exon_2	141	164
Bm_sgRNA_38438	CGGTAGTAAGACCTTTGGGA	KWMTBOMO00161_exon_2	CGGTAGTAAGACCTTTGGGAGGG	KWMTBOMO00161_exon_2	7	30
Bm_sgRNA_39006	CGTCCCGTCGTTATGAAGCT	KWMTBOMO00161_exon_2	CGTCCCGTCGTTATGAAGCTCGG	KWMTBOMO00161_exon_2	430	453
Bm_sgRNA_39667	CGTTCCCGTCACGAGGACTG	KWMTBOMO00161_exon_2	CGTTCCCGTCACGAGGACTGTGG	KWMTBOMO00161_exon_2	392	415
Bm_sgRNA_43754	CTTAGAACGATCTTATCCGG	KWMTBOMO00161_exon_2	CTTAGAACGATCTTATCCGGTGG	KWMTBOMO00161_exon_2	736	759
Bm_sgRNA_59802	GGCTCTTCTATAGTAAATGA	KWMTBOMO00161_exon_2	GGCTCTTCTATAGTAAATGACGG	KWMTBOMO00161_exon_2	867	890
Bm_sgRNA_60130	GGGAGCTCTGTCATTCTGGC	KWMTBOMO00161_exon_2	GGGAGCTCTGTCATTCTGGCGGG	KWMTBOMO00161_exon_2	685	708
Bm_sgRNA_60169	GGGATAGAGTCCGGGTTAAA	KWMTBOMO00161_exon_2	GGGATAGAGTCCGGGTTAAACGG	KWMTBOMO00161_exon_2	316	339
Bm_sgRNA_66038	GTGTGCCGAATCTCACTGAC	KWMTBOMO00161_exon_2	GTGTGCCGAATCTCACTGACGGG	KWMTBOMO00161_exon_2	793	816
Bm_sgRNA_68227	TAAACGGACGCGATAACGAT	KWMTBOMO00161_exon_2	TAAACGGACGCGATAACGATCGG	KWMTBOMO00161_exon_2	763	786
Bm_sgRNA_05462	AATAAAGCTAAATGGGTCGG	KWMTBOMO00161_exon_3	AATAAAGCTAAATGGGTCGGCGG	KWMTBOMO00161_exon_3	860	883
Bm_sgRNA_12066	ACTGCGGTGCTATTTCAGAG	KWMTBOMO00161_exon_3	ACTGCGGTGCTATTTCAGAGGGG	KWMTBOMO00161_exon_3	707	730
Bm_sgRNA_13800	AGAGACTTCGTCTCATCCAA	KWMTBOMO00161_exon_3	AGAGACTTCGTCTCATCCAAGGG	KWMTBOMO00161_exon_3	1250	1273
Bm_sgRNA_24681	ATTTTCAAACTATTCAACAT	KWMTBOMO00161_exon_3	ATTTTCAAACTATTCAACATGGG	KWMTBOMO00161_exon_3	1055	1078
Bm_sgRNA_25567	CAACATCACGATGAGTTGGA	KWMTBOMO00161_exon_3	CAACATCACGATGAGTTGGACGG	KWMTBOMO00161_exon_3	1450	1473
Bm_sgRNA_35498	CGACCAAAACCGTTATACAC	KWMTBOMO00161_exon_3	CGACCAAAACCGTTATACACGGG	KWMTBOMO00161_exon_3	1133	1156
Bm_sgRNA_46023	GAACCACTGTCCTAGGGCTA	KWMTBOMO00161_exon_3	GAACCACTGTCCTAGGGCTAGGG	KWMTBOMO00161_exon_3	766	789
Bm_sgRNA_47283	GAATGTCATCGATGCATCCA	KWMTBOMO00161_exon_3	GAATGTCATCGATGCATCCAGGG	KWMTBOMO00161_exon_3	574	597
Bm_sgRNA_73968	TCACGGAGCACATTCTTGTG	KWMTBOMO00161_exon_3	TCACGGAGCACATTCTTGTGGGG	KWMTBOMO00161_exon_3	1162	1185
Bm_sgRNA_75177	TCCAGCTGTGAGAGGTCGTG	KWMTBOMO00161_exon_3	TCCAGCTGTGAGAGGTCGTGGGG	KWMTBOMO00161_exon_3	949	972
Bm_sgRNA_80169	TGAGAGGTCGTGGGGAGGAG	KWMTBOMO00161_exon_3	TGAGAGGTCGTGGGGAGGAGCGG	KWMTBOMO00161_exon_3	957	980
Bm_sgRNA_87411	TTCATCGATGAGAATGCCCT	KWMTBOMO00161_exon_3	TTCATCGATGAGAATGCCCTTGG	KWMTBOMO00161_exon_3	1234	1257
Bm_sgRNA_19260	ATAGAGGCACCCGTCACGTG	KWMTBOMO00161_promoter	ATAGAGGCACCCGTCACGTGCGG	Bomo_Chr1	5070796	5070819
Bm_sgRNA_06044	AATCAGACCATCTGGCGTCT	KWMTBOMO00162_exon_1	AATCAGACCATCTGGCGTCTCGG	KWMTBOMO00162_exon_1	223	246
Bm_sgRNA_32036	CCATCTGGCGTCTCGGACTT	KWMTBOMO00162_exon_1	CCATCTGGCGTCTCGGACTTCGG	KWMTBOMO00162_exon_1	230	253
Bm_sgRNA_32935	CCGAAGTCCGAGACGCCAGA	KWMTBOMO00162_exon_1	CCGAAGTCCGAGACGCCAGATGG	KWMTBOMO00162_exon_1	230	253
Bm_sgRNA_34201	CCTCGATACGCGCCTACGAC	KWMTBOMO00162_exon_1	CCTCGATACGCGCCTACGACAGG	KWMTBOMO00162_exon_1	317	340
Bm_sgRNA_38438	CGGTAGTAAGACCTTTGGGA	KWMTBOMO00162_exon_1	CGGTAGTAAGACCTTTGGGAGGG	KWMTBOMO00162_exon_1	183	206
Bm_sgRNA_39006	CGTCCCGTCGTTATGAAGCT	KWMTBOMO00162_exon_1	CGTCCCGTCGTTATGAAGCTCGG	KWMTBOMO00162_exon_1	606	629
Bm_sgRNA_39667	CGTTCCCGTCACGAGGACTG	KWMTBOMO00162_exon_1	CGTTCCCGTCACGAGGACTGTGG	KWMTBOMO00162_exon_1	568	591
Bm_sgRNA_43754	CTTAGAACGATCTTATCCGG	KWMTBOMO00162_exon_1	CTTAGAACGATCTTATCCGGTGG	KWMTBOMO00162_exon_1	912	935
Bm_sgRNA_59802	GGCTCTTCTATAGTAAATGA	KWMTBOMO00162_exon_1	GGCTCTTCTATAGTAAATGACGG	KWMTBOMO00162_exon_1	1043	1066
Bm_sgRNA_60130	GGGAGCTCTGTCATTCTGGC	KWMTBOMO00162_exon_1	GGGAGCTCTGTCATTCTGGCGGG	KWMTBOMO00162_exon_1	861	884
Bm_sgRNA_60697	GGGTAGTGAGTCGGTGTTAG	KWMTBOMO00162_exon_1	GGGTAGTGAGTCGGTGTTAGCGG	KWMTBOMO00162_exon_1	735	758
Bm_sgRNA_62383	GTAACTATGCCCCCCCTCGT	KWMTBOMO00162_exon_1	GTAACTATGCCCCCCCTCGTAGG	KWMTBOMO00162_exon_1	129	152
Bm_sgRNA_65957	GTGTCAAGCCGCCTGCCATT	KWMTBOMO00162_exon_1	GTGTCAAGCCGCCTGCCATTCGG	KWMTBOMO00162_exon_1	792	815
Bm_sgRNA_66038	GTGTGCCGAATCTCACTGAC	KWMTBOMO00162_exon_1	GTGTGCCGAATCTCACTGACGGG	KWMTBOMO00162_exon_1	969	992
Bm_sgRNA_84108	TGTCAAGCCGCCTGCCATTC	KWMTBOMO00162_exon_1	TGTCAAGCCGCCTGCCATTCGGG	KWMTBOMO00162_exon_1	793	816
Bm_sgRNA_05462	AATAAAGCTAAATGGGTCGG	KWMTBOMO00162_exon_2	AATAAAGCTAAATGGGTCGGCGG	Bomo_Chr1	5080193	5080216
Bm_sgRNA_12066	ACTGCGGTGCTATTTCAGAG	KWMTBOMO00162_exon_2	ACTGCGGTGCTATTTCAGAGGGG	Bomo_Chr1	5080040	5080063
Bm_sgRNA_13800	AGAGACTTCGTCTCATCCAA	KWMTBOMO00162_exon_2	AGAGACTTCGTCTCATCCAAGGG	Bomo_Chr1	5080583	5080606
Bm_sgRNA_15660	AGCTGAATAGGAGGGGTGAA	KWMTBOMO00162_exon_2	AGCTGAATAGGAGGGGTGAAAGG	Bomo_Chr1	5080242	5080265
Bm_sgRNA_24681	ATTTTCAAACTATTCAACAT	KWMTBOMO00162_exon_2	ATTTTCAAACTATTCAACATGGG	Bomo_Chr1	5080388	5080411
Bm_sgRNA_25567	CAACATCACGATGAGTTGGA	KWMTBOMO00162_exon_2	CAACATCACGATGAGTTGGACGG	Bomo_Chr1	5080783	5080806
Bm_sgRNA_28635	CAGCTCTAGGAGCAGGCTGA	KWMTBOMO00162_exon_2	CAGCTCTAGGAGCAGGCTGAGGG	Bomo_Chr1	5079414	5079437
Bm_sgRNA_35498	CGACCAAAACCGTTATACAC	KWMTBOMO00162_exon_2	CGACCAAAACCGTTATACACGGG	Bomo_Chr1	5080466	5080489
Bm_sgRNA_44895	CTTTACAATCCCGCTTTTGC	KWMTBOMO00162_exon_2	CTTTACAATCCCGCTTTTGCAGG	Bomo_Chr1	5079691	5079714
Bm_sgRNA_46023	GAACCACTGTCCTAGGGCTA	KWMTBOMO00162_exon_2	GAACCACTGTCCTAGGGCTAGGG	Bomo_Chr1	5080099	5080122
Bm_sgRNA_47283	GAATGTCATCGATGCATCCA	KWMTBOMO00162_exon_2	GAATGTCATCGATGCATCCAGGG	Bomo_Chr1	5079907	5079930
Bm_sgRNA_73968	TCACGGAGCACATTCTTGTG	KWMTBOMO00162_exon_2	TCACGGAGCACATTCTTGTGGGG	Bomo_Chr1	5080495	5080518
Bm_sgRNA_74316	TCAGCTCTAGGAGCAGGCTG	KWMTBOMO00162_exon_2	TCAGCTCTAGGAGCAGGCTGAGG	Bomo_Chr1	5079415	5079438
Bm_sgRNA_75177	TCCAGCTGTGAGAGGTCGTG	KWMTBOMO00162_exon_2	TCCAGCTGTGAGAGGTCGTGGGG	Bomo_Chr1	5080282	5080305
Bm_sgRNA_80169	TGAGAGGTCGTGGGGAGGAG	KWMTBOMO00162_exon_2	TGAGAGGTCGTGGGGAGGAGCGG	Bomo_Chr1	5080290	5080313
Bm_sgRNA_87411	TTCATCGATGAGAATGCCCT	KWMTBOMO00162_exon_2	TTCATCGATGAGAATGCCCTTGG	Bomo_Chr1	5080567	5080590
Bm_sgRNA_12446	ACTTCATCCGGCACGAAGAC	KWMTBOMO00162_exon_3	ACTTCATCCGGCACGAAGACTGG	Bomo_Chr1	5076686	5076709
Bm_sgRNA_17591	AGTGACTCCAAATTGGGATG	KWMTBOMO00162_exon_3	AGTGACTCCAAATTGGGATGAGG	Bomo_Chr1	5076588	5076611
Bm_sgRNA_31868	CCAGTGCCTGTTATTGAACA	KWMTBOMO00162_exon_3	CCAGTGCCTGTTATTGAACATGG	Bomo_Chr1	5076782	5076805
Bm_sgRNA_46474	GAAGAGCACACAAGACTGGC	KWMTBOMO00162_exon_3	GAAGAGCACACAAGACTGGCTGG	Bomo_Chr1	5076724	5076747
Bm_sgRNA_49082	GAGCACACAAGACTGGCTGG	KWMTBOMO00162_exon_3	GAGCACACAAGACTGGCTGGCGG	Bomo_Chr1	5076721	5076744
Bm_sgRNA_88814	TTGAACATGGTATGAGAAAC	KWMTBOMO00162_exon_3	TTGAACATGGTATGAGAAACAGG	Bomo_Chr1	5076795	5076818
Bm_sgRNA_13159	AGAAGGACGAGTCGCAGGGG	KWMTBOMO00162_promoter	AGAAGGACGAGTCGCAGGGGCGG	Bomo_Chr1	5082443	5082466
Bm_sgRNA_19388	ATAGGATTTTTTAACGCTTA	KWMTBOMO00162_promoter	ATAGGATTTTTTAACGCTTACGG	Bomo_Chr1	5082174	5082197
Bm_sgRNA_38240	CGGGAGAAGGACGAGTCGCA	KWMTBOMO00162_promoter	CGGGAGAAGGACGAGTCGCAGGG	Bomo_Chr1	5082439	5082462
Bm_sgRNA_46741	GAAGGACGAGTCGCAGGGGC	KWMTBOMO00162_promoter	GAAGGACGAGTCGCAGGGGCGGG	Bomo_Chr1	5082444	5082467
Bm_sgRNA_55019	GCGGGAGAAGGACGAGTCGC	KWMTBOMO00162_promoter	GCGGGAGAAGGACGAGTCGCAGG	Bomo_Chr1	5082438	5082461
Bm_sgRNA_55105	GCGGTCGGAGGGCAAGTCGC	KWMTBOMO00162_promoter	GCGGTCGGAGGGCAAGTCGCGGG	Bomo_Chr1	5082420	5082443
Bm_sgRNA_58198	GGAGGGCAAGTCGCGGGAGA	KWMTBOMO00162_promoter	GGAGGGCAAGTCGCGGGAGAAGG	Bomo_Chr1	5082426	5082449
Bm_sgRNA_11163	ACGTGGCATCCCTAAAGAGT	KWMTBOMO00163_exon_1	ACGTGGCATCCCTAAAGAGTTGG	KWMTBOMO00163_exon_1	878	901
Bm_sgRNA_13159	AGAAGGACGAGTCGCAGGGG	KWMTBOMO00163_exon_1	AGAAGGACGAGTCGCAGGGGCGG	KWMTBOMO00163_exon_1	243	266
Bm_sgRNA_14077	AGAGTCGGAGGACGAAGAAG	KWMTBOMO00163_exon_1	AGAGTCGGAGGACGAAGAAGCGG	KWMTBOMO00163_exon_1	1344	1367
Bm_sgRNA_15619	AGCTCGGAGGCGGTTTTGGC	KWMTBOMO00163_exon_1	AGCTCGGAGGCGGTTTTGGCGGG	KWMTBOMO00163_exon_1	429	452
Bm_sgRNA_24904	CAAAACCGCCTCCGAGCTTC	KWMTBOMO00163_exon_1	CAAAACCGCCTCCGAGCTTCCGG	KWMTBOMO00163_exon_1	424	447
Bm_sgRNA_27731	CACTCCGTCGCCGCGAACGG	KWMTBOMO00163_exon_1	CACTCCGTCGCCGCGAACGGTGG	KWMTBOMO00163_exon_1	1145	1168
Bm_sgRNA_33937	CCTACGAGCAGGTGTTTTGG	KWMTBOMO00163_exon_1	CCTACGAGCAGGTGTTTTGGAGG	KWMTBOMO00163_exon_1	1377	1400
Bm_sgRNA_34222	CCTCGCTCCCGCCTCATCGA	KWMTBOMO00163_exon_1	CCTCGCTCCCGCCTCATCGACGG	KWMTBOMO00163_exon_1	1301	1324
Bm_sgRNA_35144	CGAACGGTCTGTAGCCTTTC	KWMTBOMO00163_exon_1	CGAACGGTCTGTAGCCTTTCCGG	KWMTBOMO00163_exon_1	706	729
Bm_sgRNA_35619	CGACGCAGGAGCAGCGAGCT	KWMTBOMO00163_exon_1	CGACGCAGGAGCAGCGAGCTCGG	KWMTBOMO00163_exon_1	1551	1574
Bm_sgRNA_35727	CGACTCTGACTCGGAGATGG	KWMTBOMO00163_exon_1	CGACTCTGACTCGGAGATGGAGG	KWMTBOMO00163_exon_1	1328	1351
Bm_sgRNA_36433	CGATTTATTTTAGGGGCTCG	KWMTBOMO00163_exon_1	CGATTTATTTTAGGGGCTCGGGG	KWMTBOMO00163_exon_1	460	483
Bm_sgRNA_37207	CGCGGGAACGGCAGGCACGA	KWMTBOMO00163_exon_1	CGCGGGAACGGCAGGCACGACGG	KWMTBOMO00163_exon_1	1485	1508
Bm_sgRNA_38240	CGGGAGAAGGACGAGTCGCA	KWMTBOMO00163_exon_1	CGGGAGAAGGACGAGTCGCAGGG	KWMTBOMO00163_exon_1	239	262
Bm_sgRNA_44462	CTTGAAGGCCAGAAACTCTG	KWMTBOMO00163_exon_1	CTTGAAGGCCAGAAACTCTGAGG	KWMTBOMO00163_exon_1	1608	1631
Bm_sgRNA_46741	GAAGGACGAGTCGCAGGGGC	KWMTBOMO00163_exon_1	GAAGGACGAGTCGCAGGGGCGGG	KWMTBOMO00163_exon_1	244	267
Bm_sgRNA_49471	GAGGACGAAGAAGCGGGCGC	KWMTBOMO00163_exon_1	GAGGACGAAGAAGCGGGCGCAGG	KWMTBOMO00163_exon_1	1351	1374
Bm_sgRNA_55019	GCGGGAGAAGGACGAGTCGC	KWMTBOMO00163_exon_1	GCGGGAGAAGGACGAGTCGCAGG	KWMTBOMO00163_exon_1	238	261
Bm_sgRNA_55105	GCGGTCGGAGGGCAAGTCGC	KWMTBOMO00163_exon_1	GCGGTCGGAGGGCAAGTCGCGGG	KWMTBOMO00163_exon_1	220	243
Bm_sgRNA_56567	GCTGTGGGTGGCGAAGTCGA	KWMTBOMO00163_exon_1	GCTGTGGGTGGCGAAGTCGAAGG	KWMTBOMO00163_exon_1	1634	1657
Bm_sgRNA_58198	GGAGGGCAAGTCGCGGGAGA	KWMTBOMO00163_exon_1	GGAGGGCAAGTCGCGGGAGAAGG	KWMTBOMO00163_exon_1	226	249
Bm_sgRNA_58589	GGATTCACCCTAGTACAAAA	KWMTBOMO00163_exon_1	GGATTCACCCTAGTACAAAAGGG	KWMTBOMO00163_exon_1	1276	1299
Bm_sgRNA_60040	GGGAACGGCAGGCACGACGG	KWMTBOMO00163_exon_1	GGGAACGGCAGGCACGACGGAGG	KWMTBOMO00163_exon_1	1488	1511
Bm_sgRNA_87032	TTATTTTGTGCCACCGTTCG	KWMTBOMO00163_exon_1	TTATTTTGTGCCACCGTTCGCGG	KWMTBOMO00163_exon_1	1135	1158
Bm_sgRNA_19260	ATAGAGGCACCCGTCACGTG	KWMTBOMO00163_promoter	ATAGAGGCACCCGTCACGTGCGG	Bomo_Chr1	5084271	5084294
Bm_sgRNA_21789	ATGATGTTTGTTATCTGTGG	KWMTBOMO00163_promoter	ATGATGTTTGTTATCTGTGGCGG	Bomo_Chr1	5084298	5084321
Bm_sgRNA_57464	GGAATGATGTTTGTTATCTG	KWMTBOMO00163_promoter	GGAATGATGTTTGTTATCTGTGG	Bomo_Chr1	5084295	5084318
Bm_sgRNA_80823	TGATGTTTGTTATCTGTGGC	KWMTBOMO00163_promoter	TGATGTTTGTTATCTGTGGCGGG	Bomo_Chr1	5084299	5084322
Bm_sgRNA_29940	CATCGCATGGGTCATATATG	KWMTBOMO00165_exon_2	CATCGCATGGGTCATATATGTGG	Bomo_Chr1	5190961	5190984
Bm_sgRNA_47688	GACATACTCAAGCGGTATCT	KWMTBOMO00165_exon_2	GACATACTCAAGCGGTATCTGGG	Bomo_Chr1	5190596	5190619
Bm_sgRNA_63101	GTAGGTGTAGACTGGCACGA	KWMTBOMO00165_exon_2	GTAGGTGTAGACTGGCACGAGGG	Bomo_Chr1	5190431	5190454
Bm_sgRNA_71224	TAGGTGTAGACTGGCACGAG	KWMTBOMO00165_exon_2	TAGGTGTAGACTGGCACGAGGGG	Bomo_Chr1	5190430	5190453
Bm_sgRNA_81462	TGCCGATCGCTCTAACCTGC	KWMTBOMO00165_exon_2	TGCCGATCGCTCTAACCTGCGGG	Bomo_Chr1	5191086	5191109
Bm_sgRNA_89332	TTGCCGATCGCTCTAACCTG	KWMTBOMO00165_exon_2	TTGCCGATCGCTCTAACCTGCGG	Bomo_Chr1	5191085	5191108
Bm_sgRNA_18941	ATACCCTATCTAGAAAAATA	KWMTBOMO00165_promoter	ATACCCTATCTAGAAAAATAAGG	Bomo_Chr1	5188669	5188692
Bm_sgRNA_39050	CGTCCTTATTTTTCTAGATA	KWMTBOMO00165_promoter	CGTCCTTATTTTTCTAGATAGGG	Bomo_Chr1	5188666	5188689
Bm_sgRNA_67915	GTTTTCGTCTACAAACAAGA	KWMTBOMO00165_promoter	GTTTTCGTCTACAAACAAGAAGG	Bomo_Chr1	5188617	5188640
Bm_sgRNA_22028	ATGCGTGGAAGGTTTCTCCT	KWMTBOMO00166_exon_1	ATGCGTGGAAGGTTTCTCCTCGG	Bomo_Chr1	5248873	5248896
Bm_sgRNA_25826	CAACTGGGCGGTGAAATGCG	KWMTBOMO00166_exon_1	CAACTGGGCGGTGAAATGCGTGG	Bomo_Chr1	5248888	5248911
Bm_sgRNA_73012	TATTGTTACAGGTTACACCG	KWMTBOMO00166_exon_1	TATTGTTACAGGTTACACCGAGG	Bomo_Chr1	5248856	5248879
Bm_sgRNA_73988	TCACGTCAATAGAGTTAGGG	KWMTBOMO00166_exon_1	TCACGTCAATAGAGTTAGGGAGG	Bomo_Chr1	5248678	5248701
Bm_sgRNA_83194	TGGGCGGTGAAATGCGTGGA	KWMTBOMO00166_exon_1	TGGGCGGTGAAATGCGTGGAAGG	Bomo_Chr1	5248884	5248907
Bm_sgRNA_85599	TTAACATATTTTATTGTTAC	KWMTBOMO00166_exon_1	TTAACATATTTTATTGTTACAGG	Bomo_Chr1	5248845	5248868
Bm_sgRNA_32984	CCGACTCCTGGTGCTTATTT	KWMTBOMO00166_exon_2	CCGACTCCTGGTGCTTATTTAGG	Bomo_Chr1	5249879	5249902
Bm_sgRNA_61819	GGTGGTGGCAAGAGTTATTT	KWMTBOMO00166_promoter	GGTGGTGGCAAGAGTTATTTCGG	Bomo_Chr1	5248640	5248663
Bm_sgRNA_06955	AATTACGTCTGCCCCCACCG	KWMTBOMO00167_exon_1	AATTACGTCTGCCCCCACCGAGG	Bomo_Chr1	5305500	5305523
Bm_sgRNA_21348	ATCTTCATGAGTTCCGTATA	KWMTBOMO00167_exon_1	ATCTTCATGAGTTCCGTATATGG	Bomo_Chr1	5305397	5305420
Bm_sgRNA_23388	ATTCATTAGACGGCCTCGGT	KWMTBOMO00167_exon_1	ATTCATTAGACGGCCTCGGTGGG	Bomo_Chr1	5305513	5305536
Bm_sgRNA_48773	GAGAAGGTACAATCTCTTGC	KWMTBOMO00167_exon_1	GAGAAGGTACAATCTCTTGCTGG	Bomo_Chr1	5305356	5305379
Bm_sgRNA_66302	GTTACCAATGAGACCATATA	KWMTBOMO00167_exon_1	GTTACCAATGAGACCATATACGG	Bomo_Chr1	5305410	5305433
Bm_sgRNA_70142	TACGCAGTATGAACGCGAGA	KWMTBOMO00167_exon_1	TACGCAGTATGAACGCGAGAAGG	Bomo_Chr1	5305162	5305185
Bm_sgRNA_72352	TATGATAGCGCGATATGATG	KWMTBOMO00167_exon_1	TATGATAGCGCGATATGATGAGG	Bomo_Chr1	5305309	5305332
Bm_sgRNA_87464	TTCATTAGACGGCCTCGGTG	KWMTBOMO00167_exon_1	TTCATTAGACGGCCTCGGTGGGG	Bomo_Chr1	5305512	5305535
Bm_sgRNA_11852	ACTCTTGGTGGCTTCGGTAT	KWMTBOMO00168_exon_2	ACTCTTGGTGGCTTCGGTATAGG	Bomo_Chr1	5307654	5307677
Bm_sgRNA_83060	TGGCTTCGGTATAGGTTGGT	KWMTBOMO00168_exon_2	TGGCTTCGGTATAGGTTGGTTGG	Bomo_Chr1	5307662	5307685
Bm_sgRNA_86347	TTAGCATCTCTCACATACCT	KWMTBOMO00168_exon_2	TTAGCATCTCTCACATACCTTGG	Bomo_Chr1	5307702	5307725
Bm_sgRNA_92139	TTTGTTTGGTGGACCACTCT	KWMTBOMO00168_exon_2	TTTGTTTGGTGGACCACTCTTGG	Bomo_Chr1	5307639	5307662
Bm_sgRNA_05082	AAGTACATACGAGAGGTGAC	KWMTBOMO00169_exon_2	AAGTACATACGAGAGGTGACAGG	Bomo_Chr1	5324785	5324808
Bm_sgRNA_20841	ATCGCGAAGATTCCGGTAGT	KWMTBOMO00169_exon_2	ATCGCGAAGATTCCGGTAGTGGG	Bomo_Chr1	5324889	5324912
Bm_sgRNA_32317	CCCAGCTGCAAATAATTCGT	KWMTBOMO00169_exon_2	CCCAGCTGCAAATAATTCGTGGG	Bomo_Chr1	5324718	5324741
Bm_sgRNA_41807	CTCGTAGAGCCGGTAACTCC	KWMTBOMO00169_exon_2	CTCGTAGAGCCGGTAACTCCAGG	Bomo_Chr1	5324624	5324647
Bm_sgRNA_47337	GAATTATTTGCAGCTGGGGC	KWMTBOMO00169_exon_2	GAATTATTTGCAGCTGGGGCAGG	Bomo_Chr1	5324723	5324746
Bm_sgRNA_50640	GATCGCGAAGATTCCGGTAG	KWMTBOMO00169_exon_2	GATCGCGAAGATTCCGGTAGTGG	Bomo_Chr1	5324888	5324911
Bm_sgRNA_72583	TATGTCCACGGCTTTCACCC	KWMTBOMO00169_exon_2	TATGTCCACGGCTTTCACCCTGG	Bomo_Chr1	5324642	5324665
Bm_sgRNA_75445	TCCCCAGCAGCCCATCTTGC	KWMTBOMO00169_exon_2	TCCCCAGCAGCCCATCTTGCAGG	Bomo_Chr1	5324445	5324468
Bm_sgRNA_77101	TCGTAGAGCCGGTAACTCCA	KWMTBOMO00169_exon_2	TCGTAGAGCCGGTAACTCCAGGG	Bomo_Chr1	5324625	5324648
Bm_sgRNA_77855	TCTCCAGCCATGTCAGCTCG	KWMTBOMO00169_exon_2	TCTCCAGCCATGTCAGCTCGAGG	Bomo_Chr1	5324834	5324857
Bm_sgRNA_48924	GAGAGGCACTGATCAGGCCC	KWMTBOMO00169_exon_3	GAGAGGCACTGATCAGGCCCCGG	Bomo_Chr1	5323125	5323148
Bm_sgRNA_82035	TGCTCTGCGGATGGGTGCTG	KWMTBOMO00169_exon_3	TGCTCTGCGGATGGGTGCTGGGG	Bomo_Chr1	5323149	5323172
Bm_sgRNA_84137	TGTCACTCGGAGTGCCTTGA	KWMTBOMO00169_exon_4	TGTCACTCGGAGTGCCTTGACGG	Bomo_Chr1	5322665	5322688
Bm_sgRNA_07266	AATTTAAATAGAACTACGTC	KWMTBOMO00170_exon_1	AATTTAAATAGAACTACGTCAGG	Bomo_Chr1	5352153	5352176
Bm_sgRNA_38949	CGTCAGGCATTTATAAATAT	KWMTBOMO00170_exon_1	CGTCAGGCATTTATAAATATAGG	Bomo_Chr1	5352137	5352160
Bm_sgRNA_39888	CGTTTTCGAAAGCGTCTCTT	KWMTBOMO00170_exon_1	CGTTTTCGAAAGCGTCTCTTGGG	Bomo_Chr1	5353199	5353222
Bm_sgRNA_40057	CTAAGAGCGGAATTGACGTC	KWMTBOMO00170_exon_1	CTAAGAGCGGAATTGACGTCAGG	Bomo_Chr1	5353259	5353282
Bm_sgRNA_48353	GACGTAGTTCTATTTAAATT	KWMTBOMO00170_exon_1	GACGTAGTTCTATTTAAATTCGG	Bomo_Chr1	5352156	5352179
Bm_sgRNA_63933	GTCCCCTCGTTTGCTAAGAG	KWMTBOMO00170_exon_1	GTCCCCTCGTTTGCTAAGAGCGG	Bomo_Chr1	5353272	5353295
Bm_sgRNA_64576	GTCTCCTCAGTGCAGTCTAC	KWMTBOMO00170_exon_1	GTCTCCTCAGTGCAGTCTACAGG	Bomo_Chr1	5352346	5352369
Bm_sgRNA_87539	TTCCACATCCTTTATCGGGA	KWMTBOMO00170_exon_1	TTCCACATCCTTTATCGGGAAGG	Bomo_Chr1	5352392	5352415
Bm_sgRNA_87707	TTCCGCTCTTAGCAAACGAG	KWMTBOMO00170_exon_1	TTCCGCTCTTAGCAAACGAGGGG	Bomo_Chr1	5353270	5353293
Bm_sgRNA_16836	AGGTTGAGAGGGGGGTGCGC	KWMTBOMO00171_exon_1	AGGTTGAGAGGGGGGTGCGCGGG	Bomo_Chr1	5480407	5480430
Bm_sgRNA_20570	ATCCGCGAGCTCCAGGCAAG	KWMTBOMO00171_exon_1	ATCCGCGAGCTCCAGGCAAGCGG	Bomo_Chr1	5480442	5480465
Bm_sgRNA_31679	CCAGCCTGGAGAGAGCACTC	KWMTBOMO00171_exon_1	CCAGCCTGGAGAGAGCACTCAGG	Bomo_Chr1	5480676	5480699
Bm_sgRNA_41289	CTCCAGGGCGGCCGCTTGCC	KWMTBOMO00171_exon_1	CTCCAGGGCGGCCGCTTGCCTGG	Bomo_Chr1	5480453	5480476
Bm_sgRNA_53551	GCCCCCGCCGCTGCTGCGGT	KWMTBOMO00171_exon_1	GCCCCCGCCGCTGCTGCGGTAGG	Bomo_Chr1	5480621	5480644
Bm_sgRNA_56311	GCTGCTGCGGTAGGTGTACT	KWMTBOMO00171_exon_1	GCTGCTGCGGTAGGTGTACTTGG	Bomo_Chr1	5480612	5480635
Bm_sgRNA_58247	GGAGTACTCGATGTTAACGT	KWMTBOMO00171_exon_1	GGAGTACTCGATGTTAACGTCGG	Bomo_Chr1	5480648	5480671
Bm_sgRNA_62826	GTACTCGATGTTAACGTCGG	KWMTBOMO00171_exon_1	GTACTCGATGTTAACGTCGGTGG	Bomo_Chr1	5480645	5480668
Bm_sgRNA_69627	TACACCTACCGCAGCAGCGG	KWMTBOMO00171_exon_1	TACACCTACCGCAGCAGCGGCGG	Bomo_Chr1	5480617	5480640
Bm_sgRNA_08789	ACATAAGCGGAAGAACCAGG	KWMTBOMO00172_exon_3	ACATAAGCGGAAGAACCAGGTGG	Bomo_Chr1	5524059	5524082
Bm_sgRNA_13084	AGAAGAGCGCTCTGAGCCAT	KWMTBOMO00172_exon_3	AGAAGAGCGCTCTGAGCCATGGG	Bomo_Chr1	5523367	5523390
Bm_sgRNA_43371	CTGTCCTTCTGTCTGGACTT	KWMTBOMO00172_exon_3	CTGTCCTTCTGTCTGGACTTAGG	Bomo_Chr1	5523590	5523613
Bm_sgRNA_64722	GTCTTCACTGTCCTTCTGTC	KWMTBOMO00172_exon_3	GTCTTCACTGTCCTTCTGTCTGG	Bomo_Chr1	5523597	5523620
Bm_sgRNA_78424	TCTGGACTTAGGTGTCTTGA	KWMTBOMO00172_exon_3	TCTGGACTTAGGTGTCTTGATGG	Bomo_Chr1	5523579	5523602
Bm_sgRNA_89984	TTGTATAGCTTGATGTCCGA	KWMTBOMO00172_exon_3	TTGTATAGCTTGATGTCCGAGGG	Bomo_Chr1	5523728	5523751
Bm_sgRNA_02121	AAATCTCTATACCAACGGAC	KWMTBOMO00172_exon_5	AAATCTCTATACCAACGGACCGG	Bomo_Chr1	5524993	5525016
Bm_sgRNA_00192	AAAAATCACGTGATCATCAA	KWMTBOMO00175_exon_1	AAAAATCACGTGATCATCAATGG	Bomo_Chr1	5599804	5599827
Bm_sgRNA_58506	GGATGCCACGTTAACTATAT	KWMTBOMO00175_exon_1	GGATGCCACGTTAACTATATAGG	Bomo_Chr1	5599865	5599888
Bm_sgRNA_00451	AAAAGCAGCTATCATGAAAA	KWMTBOMO00175_exon_2	AAAAGCAGCTATCATGAAAATGG	Bomo_Chr1	5600066	5600089
Bm_sgRNA_27418	CACGATGTTGCCTACTGAAG	KWMTBOMO00175_exon_2	CACGATGTTGCCTACTGAAGAGG	Bomo_Chr1	5600129	5600152
Bm_sgRNA_57022	GCTTTTATGGTCTGTGGCGT	KWMTBOMO00175_exon_2	GCTTTTATGGTCTGTGGCGTCGG	Bomo_Chr1	5600049	5600072
Bm_sgRNA_75547	TCCCTCTCTACCGATAACTG	KWMTBOMO00175_exon_2	TCCCTCTCTACCGATAACTGTGG	Bomo_Chr1	5600092	5600115
Bm_sgRNA_77450	TCTAAGATTAGGTTTCTCTT	KWMTBOMO00175_exon_2	TCTAAGATTAGGTTTCTCTTTGG	Bomo_Chr1	5599983	5600006
Bm_sgRNA_81333	TGCCACAGTTATCGGTAGAG	KWMTBOMO00175_exon_2	TGCCACAGTTATCGGTAGAGAGG	Bomo_Chr1	5600090	5600113
Bm_sgRNA_19347	ATAGCTATCGCTATGTAAAA	KWMTBOMO00176_exon_2	ATAGCTATCGCTATGTAAAAAGG	Bomo_Chr1	5617049	5617072
Bm_sgRNA_27190	CACCGACTTTTGATATGATG	KWMTBOMO00176_exon_2	CACCGACTTTTGATATGATGGGG	Bomo_Chr1	5617018	5617041
Bm_sgRNA_35898	CGAGCCAATAGTCAGAGTAT	KWMTBOMO00176_exon_2	CGAGCCAATAGTCAGAGTATCGG	Bomo_Chr1	5617126	5617149
Bm_sgRNA_55605	GCTATAAGTTCCGTTATTTT	KWMTBOMO00176_exon_2	GCTATAAGTTCCGTTATTTTGGG	Bomo_Chr1	5617067	5617090
Bm_sgRNA_55802	GCTCCCGATACTCTGACTAT	KWMTBOMO00176_exon_2	GCTCCCGATACTCTGACTATTGG	Bomo_Chr1	5617122	5617145
Bm_sgRNA_87667	TTCCCTGTAAATAAGTCAAT	KWMTBOMO00176_exon_2	TTCCCTGTAAATAAGTCAATAGG	Bomo_Chr1	5616974	5616997
Bm_sgRNA_18939	ATACCCATCAGTCTCACAGG	KWMTBOMO00177_exon_2	ATACCCATCAGTCTCACAGGTGG	Bomo_Chr1	5639266	5639289
Bm_sgRNA_20255	ATCAGTCTCACAGGTGGAAT	KWMTBOMO00177_exon_2	ATCAGTCTCACAGGTGGAATTGG	Bomo_Chr1	5639272	5639295
Bm_sgRNA_75354	TCCATTTTCAAAACTGGCAG	KWMTBOMO00177_exon_2	TCCATTTTCAAAACTGGCAGAGG	Bomo_Chr1	5639236	5639259
Bm_sgRNA_82532	TGGAGCTCCATTTTCAAAAC	KWMTBOMO00177_exon_2	TGGAGCTCCATTTTCAAAACTGG	Bomo_Chr1	5639230	5639253
Bm_sgRNA_19180	ATACTTTTCGTCTAAAAAAA	KWMTBOMO00177_promoter	ATACTTTTCGTCTAAAAAAATGG	Bomo_Chr1	5644870	5644893
Bm_sgRNA_19903	ATATTGACACTAGAAAGACA	KWMTBOMO00177_promoter	ATATTGACACTAGAAAGACACGG	Bomo_Chr1	5644955	5644978
Bm_sgRNA_23093	ATTAGATTGTTTCTTCATAC	KWMTBOMO00177_promoter	ATTAGATTGTTTCTTCATACCGG	Bomo_Chr1	5644934	5644957
Bm_sgRNA_57198	GGAACATTTGACATTTTCAT	KWMTBOMO00177_promoter	GGAACATTTGACATTTTCATTGG	Bomo_Chr1	5645003	5645026
Bm_sgRNA_06019	AATCAATGCCCCTCAGAGAC	KWMTBOMO00179_exon_2	AATCAATGCCCCTCAGAGACAGG	Bomo_Chr1	5667213	5667236
Bm_sgRNA_34780	CCTTCGTAGCCCTGTCTCTG	KWMTBOMO00179_exon_2	CCTTCGTAGCCCTGTCTCTGAGG	Bomo_Chr1	5667203	5667226
Bm_sgRNA_36985	CGCCTTTCGGGTCTCTTACG	KWMTBOMO00179_exon_2	CGCCTTTCGGGTCTCTTACGAGG	Bomo_Chr1	5667281	5667304
Bm_sgRNA_41867	CTCGTGTATGAGCCTATCTT	KWMTBOMO00179_exon_2	CTCGTGTATGAGCCTATCTTTGG	Bomo_Chr1	5667358	5667381
Bm_sgRNA_48871	GAGAGACCCATCAAGTTCTT	KWMTBOMO00179_exon_2	GAGAGACCCATCAAGTTCTTTGG	Bomo_Chr1	5667241	5667264
Bm_sgRNA_54245	GCCTTTCGGGTCTCTTACGA	KWMTBOMO00179_exon_2	GCCTTTCGGGTCTCTTACGAGGG	Bomo_Chr1	5667282	5667305
Bm_sgRNA_14998	AGCCCGTTAGGCGGTGCGTA	KWMTBOMO00180_exon_2	AGCCCGTTAGGCGGTGCGTATGG	Bomo_Chr1	5702023	5702046
Bm_sgRNA_40285	CTACCATACGCACCGCCTAA	KWMTBOMO00180_exon_2	CTACCATACGCACCGCCTAACGG	Bomo_Chr1	5702026	5702049
Bm_sgRNA_55195	GCGTATGGTAGAAATATTGA	KWMTBOMO00180_exon_2	GCGTATGGTAGAAATATTGATGG	Bomo_Chr1	5702038	5702061
Bm_sgRNA_62381	GTAACTAGCTTCGATTCTTG	KWMTBOMO00180_exon_2	GTAACTAGCTTCGATTCTTGTGG	Bomo_Chr1	5701999	5702022
Bm_sgRNA_78964	TCTTGTGGAAGCCCGTTAGG	KWMTBOMO00180_exon_2	TCTTGTGGAAGCCCGTTAGGCGG	Bomo_Chr1	5702014	5702037
Bm_sgRNA_12733	ACTTTGGATTCCTCACCACC	KWMTBOMO00180_exon_3	ACTTTGGATTCCTCACCACCAGG	Bomo_Chr1	5701843	5701866
Bm_sgRNA_58394	GGATATTTTCTTAATATTAC	KWMTBOMO00181_exon_2	GGATATTTTCTTAATATTACTGG	Bomo_Chr1	5704462	5704485
Bm_sgRNA_61901	GGTGTGTCATACGATGAGAA	KWMTBOMO00181_exon_2	GGTGTGTCATACGATGAGAATGG	Bomo_Chr1	5704407	5704430
Bm_sgRNA_23788	ATTGACCATCTTTGACATTG	KWMTBOMO00181_exon_3	ATTGACCATCTTTGACATTGAGG	Bomo_Chr1	5709268	5709291
Bm_sgRNA_40978	CTCAAGACTCCCAAGAGCTT	KWMTBOMO00181_exon_3	CTCAAGACTCCCAAGAGCTTAGG	Bomo_Chr1	5709304	5709327
Bm_sgRNA_41156	CTCATCACTGAGTCGTTCTC	KWMTBOMO00181_exon_4	CTCATCACTGAGTCGTTCTCTGG	Bomo_Chr1	5709636	5709659
Bm_sgRNA_90294	TTGTTGGCAGCGTTATCTTT	KWMTBOMO00181_exon_4	TTGTTGGCAGCGTTATCTTTAGG	Bomo_Chr1	5709608	5709631
Bm_sgRNA_13106	AGAAGATGTGAAAAAAGCAA	KWMTBOMO00181_exon_5	AGAAGATGTGAAAAAAGCAAAGG	Bomo_Chr1	5710683	5710706
Bm_sgRNA_89800	TTGGGGATCCTTTCGCTATG	KWMTBOMO00181_exon_5	TTGGGGATCCTTTCGCTATGGGG	Bomo_Chr1	5710721	5710744
Bm_sgRNA_20285	ATCATAGCTCTGTAGTGTAT	KWMTBOMO00181_promoter	ATCATAGCTCTGTAGTGTATGGG	Bomo_Chr1	5704208	5704231
Bm_sgRNA_71945	TATCATAGCTCTGTAGTGTA	KWMTBOMO00181_promoter	TATCATAGCTCTGTAGTGTATGG	Bomo_Chr1	5704207	5704230
Bm_sgRNA_67717	GTTTCTTCGGCATTGTTCGA	KWMTBOMO00182_exon_3	GTTTCTTCGGCATTGTTCGATGG	Bomo_Chr1	5872723	5872746
Bm_sgRNA_04570	AAGCGGCTTCTCCGCTAAAC	KWMTBOMO00182_exon_4	AAGCGGCTTCTCCGCTAAACCGG	Bomo_Chr1	5860445	5860468
Bm_sgRNA_15058	AGCCGCTTGTACCGAGGTGC	KWMTBOMO00182_exon_4	AGCCGCTTGTACCGAGGTGCGGG	Bomo_Chr1	5860430	5860453
Bm_sgRNA_33064	CCGAGTGCTCGCCGGTTTAG	KWMTBOMO00182_exon_4	CCGAGTGCTCGCCGGTTTAGCGG	Bomo_Chr1	5860456	5860479
Bm_sgRNA_37696	CGGAGAAGCCGCTTGTACCG	KWMTBOMO00182_exon_4	CGGAGAAGCCGCTTGTACCGAGG	Bomo_Chr1	5860436	5860459
Bm_sgRNA_81205	TGCAGTTCCCGAGTGCTCGC	KWMTBOMO00182_exon_4	TGCAGTTCCCGAGTGCTCGCCGG	Bomo_Chr1	5860464	5860487
Bm_sgRNA_11752	ACTCGGTCCCTTCGTTCCCG	KWMTBOMO00182_exon_7	ACTCGGTCCCTTCGTTCCCGTGG	Bomo_Chr1	5794406	5794429
Bm_sgRNA_27447	CACGCCCTGGGTCATGCCAC	KWMTBOMO00182_exon_7	CACGCCCTGGGTCATGCCACGGG	Bomo_Chr1	5794390	5794413
Bm_sgRNA_39668	CGTTCCCGTGGCATGACCCA	KWMTBOMO00182_exon_7	CGTTCCCGTGGCATGACCCAGGG	Bomo_Chr1	5794394	5794417
Bm_sgRNA_52115	GCACATCGAACCAGGCCGGA	KWMTBOMO00182_exon_7	GCACATCGAACCAGGCCGGATGG	Bomo_Chr1	5794456	5794479
Bm_sgRNA_52239	GCACGCCCTGGGTCATGCCA	KWMTBOMO00182_exon_7	GCACGCCCTGGGTCATGCCACGG	Bomo_Chr1	5794389	5794412
Bm_sgRNA_77334	TCGTTCCCGTGGCATGACCC	KWMTBOMO00182_exon_7	TCGTTCCCGTGGCATGACCCAGG	Bomo_Chr1	5794395	5794418
Bm_sgRNA_04833	AAGGCAGGTTTCGGCACTGA	KWMTBOMO00183_exon_1	AAGGCAGGTTTCGGCACTGAGGG	KWMTBOMO00183_exon_1	1349	1372
Bm_sgRNA_44586	CTTGCCCGGGGGGGCGGCCC	KWMTBOMO00183_exon_1	CTTGCCCGGGGGGGCGGCCCCGG	KWMTBOMO00183_exon_1	40	63
Bm_sgRNA_61084	GGTAGTCGTGACACCGGAGT	KWMTBOMO00183_exon_1	GGTAGTCGTGACACCGGAGTCGG	KWMTBOMO00183_exon_1	550	573
Bm_sgRNA_61631	GGTGCACACTAACTATCGGG	KWMTBOMO00183_exon_1	GGTGCACACTAACTATCGGGAGG	KWMTBOMO00183_exon_1	922	945
Bm_sgRNA_86409	TTAGGAGCGGGCGCGGGCTT	KWMTBOMO00183_exon_1	TTAGGAGCGGGCGCGGGCTTGGG	KWMTBOMO00183_exon_1	605	628
Bm_sgRNA_89544	TTGCTTCTTGCCCGGGGGGG	KWMTBOMO00183_exon_1	TTGCTTCTTGCCCGGGGGGGCGG	KWMTBOMO00183_exon_1	46	69
Bm_sgRNA_59722	GGCGTTGGGCAAGTGATCAA	KWMTBOMO00184_exon_2	GGCGTTGGGCAAGTGATCAAGGG	Bomo_Chr1	5956014	5956037
Bm_sgRNA_82957	TGGCGTTGGGCAAGTGATCA	KWMTBOMO00184_exon_2	TGGCGTTGGGCAAGTGATCAAGG	Bomo_Chr1	5956013	5956036
Bm_sgRNA_89778	TTGGGCAAGTGATCAAGGGA	KWMTBOMO00184_exon_2	TTGGGCAAGTGATCAAGGGATGG	Bomo_Chr1	5956018	5956041
Bm_sgRNA_90555	TTTACGTTCCAAATTGGCGT	KWMTBOMO00184_exon_2	TTTACGTTCCAAATTGGCGTTGG	Bomo_Chr1	5955999	5956022
Bm_sgRNA_11149	ACGTGCGCTCGAAATTAACG	KWMTBOMO00185_exon_1	ACGTGCGCTCGAAATTAACGCGG	KWMTBOMO00185_exon_1	1413	1436
Bm_sgRNA_13623	AGACGTTTTCGCGGAGCCCT	KWMTBOMO00185_exon_1	AGACGTTTTCGCGGAGCCCTGGG	KWMTBOMO00185_exon_1	382	405
Bm_sgRNA_27145	CACCCAGCTCCGCGAACCGT	KWMTBOMO00185_exon_1	CACCCAGCTCCGCGAACCGTCGG	KWMTBOMO00185_exon_1	355	378
Bm_sgRNA_37281	CGCGTCGTGCCTCCGAGGCA	KWMTBOMO00185_exon_1	CGCGTCGTGCCTCCGAGGCACGG	KWMTBOMO00185_exon_1	1448	1471
Bm_sgRNA_60796	GGGTGGGTTAGACGTTTTCG	KWMTBOMO00185_exon_1	GGGTGGGTTAGACGTTTTCGCGG	KWMTBOMO00185_exon_1	373	396
Bm_sgRNA_61631	GGTGCACACTAACTATCGGG	KWMTBOMO00185_exon_1	GGTGCACACTAACTATCGGGAGG	KWMTBOMO00185_exon_1	743	766
Bm_sgRNA_70678	TAGACGTTTTCGCGGAGCCC	KWMTBOMO00185_exon_1	TAGACGTTTTCGCGGAGCCCTGG	KWMTBOMO00185_exon_1	381	404
Bm_sgRNA_75784	TCCGGTGTAACTACTACTTT	KWMTBOMO00185_exon_1	TCCGGTGTAACTACTACTTTCGG	KWMTBOMO00185_exon_1	1120	1143
Bm_sgRNA_81741	TGCGCTCGAAATTAACGCGG	KWMTBOMO00185_exon_1	TGCGCTCGAAATTAACGCGGCGG	KWMTBOMO00185_exon_1	1416	1439
Bm_sgRNA_48690	GACTTTCGGGTCGCGACGCG	KWMTBOMO00185_exon_2	GACTTTCGGGTCGCGACGCGAGG	KWMTBOMO00185_exon_2	1101	1124
Bm_sgRNA_49536	GAGGATTGGCGGAGCGGCGT	KWMTBOMO00185_exon_2	GAGGATTGGCGGAGCGGCGTCGG	KWMTBOMO00185_exon_2	498	521
Bm_sgRNA_56264	GCTGCGCCATTTTGAGAAGG	KWMTBOMO00185_exon_3	GCTGCGCCATTTTGAGAAGGCGG	KWMTBOMO00185_exon_3	313	336
Bm_sgRNA_01980	AAATATGAGACGTTCAGACA	KWMTBOMO00186_exon_1	AAATATGAGACGTTCAGACATGG	Bomo_Chr1	5963662	5963685
Bm_sgRNA_03585	AACTATAAAGGAGTGCGGTA	KWMTBOMO00186_exon_1	AACTATAAAGGAGTGCGGTATGG	Bomo_Chr1	5963267	5963290
Bm_sgRNA_11524	ACTATTCGGACACTAGGTTG	KWMTBOMO00186_exon_1	ACTATTCGGACACTAGGTTGAGG	Bomo_Chr1	5963593	5963616
Bm_sgRNA_28326	CAGCAGCACTATCCCCAGCG	KWMTBOMO00186_exon_1	CAGCAGCACTATCCCCAGCGCGG	Bomo_Chr1	5963623	5963646
Bm_sgRNA_40882	CTATTCGGACACTAGGTTGA	KWMTBOMO00186_exon_1	CTATTCGGACACTAGGTTGAGGG	Bomo_Chr1	5963594	5963617
Bm_sgRNA_40989	CTCAAGGGTGTGAACTATAA	KWMTBOMO00186_exon_1	CTCAAGGGTGTGAACTATAAAGG	Bomo_Chr1	5963255	5963278
Bm_sgRNA_66013	GTGTGAACTATAAAGGAGTG	KWMTBOMO00186_exon_1	GTGTGAACTATAAAGGAGTGCGG	Bomo_Chr1	5963262	5963285
Bm_sgRNA_68130	TAAAATACAACGGCGGTGTA	KWMTBOMO00186_exon_1	TAAAATACAACGGCGGTGTAAGG	Bomo_Chr1	5963464	5963487
Bm_sgRNA_79178	TGAAACCCTTACCAGATTGG	KWMTBOMO00186_exon_1	TGAAACCCTTACCAGATTGGTGG	Bomo_Chr1	5964505	5964528
Bm_sgRNA_88018	TTCGCCTGCCCCGCATGGGA	KWMTBOMO00186_promoter	TTCGCCTGCCCCGCATGGGAGGG	Bomo_Chr1	5962771	5962794
Bm_sgRNA_17867	AGTGTCCTCACTGACCACGA	KWMTBOMO00187_exon_1	AGTGTCCTCACTGACCACGAAGG	Bomo_Chr1	5977869	5977892
Bm_sgRNA_29490	CATACTGTATAGCTAATTGT	KWMTBOMO00187_exon_1	CATACTGTATAGCTAATTGTAGG	Bomo_Chr1	5978040	5978063
Bm_sgRNA_55441	GCTAATATTTATTCCCTTCG	KWMTBOMO00187_exon_1	GCTAATATTTATTCCCTTCGTGG	Bomo_Chr1	5977883	5977906
Bm_sgRNA_62492	GTAATATAGTCAGTTTAGTT	KWMTBOMO00187_exon_1	GTAATATAGTCAGTTTAGTTAGG	Bomo_Chr1	5978007	5978030
Bm_sgRNA_65968	GTGTCCTCACTGACCACGAA	KWMTBOMO00187_exon_1	GTGTCCTCACTGACCACGAAGGG	Bomo_Chr1	5977870	5977893
Bm_sgRNA_72806	TATTCCCTTCGTGGTCAGTG	KWMTBOMO00187_exon_1	TATTCCCTTCGTGGTCAGTGAGG	Bomo_Chr1	5977874	5977897
Bm_sgRNA_88258	TTCGTGGTCAGTGAGGACAC	KWMTBOMO00187_exon_1	TTCGTGGTCAGTGAGGACACTGG	Bomo_Chr1	5977867	5977890
Bm_sgRNA_80546	TGATATAAATAGGATTCGTG	KWMTBOMO00187_exon_2	TGATATAAATAGGATTCGTGCGG	Bomo_Chr1	5976030	5976053
Bm_sgRNA_27921	CACTTGTGTATTATCATGTT	KWMTBOMO00188_exon_1	CACTTGTGTATTATCATGTTAGG	Bomo_Chr1	5981733	5981756
Bm_sgRNA_71551	TATAAGCTGCTGAAGAAATA	KWMTBOMO00188_exon_2	TATAAGCTGCTGAAGAAATAAGG	Bomo_Chr1	5981988	5982011
Bm_sgRNA_12548	ACTTGACTCATCGCTATGTA	KWMTBOMO00188_exon_3	ACTTGACTCATCGCTATGTAGGG	Bomo_Chr1	5982806	5982829
Bm_sgRNA_13752	AGAGAAGCAGCTCTAGACTT	KWMTBOMO00188_exon_3	AGAGAAGCAGCTCTAGACTTTGG	Bomo_Chr1	5982874	5982897
Bm_sgRNA_66323	GTTACGACGAATACCAGTTC	KWMTBOMO00188_exon_3	GTTACGACGAATACCAGTTCTGG	Bomo_Chr1	5982781	5982804
Bm_sgRNA_16246	AGGCCCCGAAGTTATTCCCA	KWMTBOMO00189_exon_2	AGGCCCCGAAGTTATTCCCAGGG	Bomo_Chr1	5998276	5998299
Bm_sgRNA_25983	CAAGATCGCATCTGTGCGGG	KWMTBOMO00189_exon_2	CAAGATCGCATCTGTGCGGGCGG	Bomo_Chr1	5998316	5998339
Bm_sgRNA_30717	CATTGTGTGAGGCGGAATAG	KWMTBOMO00189_exon_2	CATTGTGTGAGGCGGAATAGTGG	Bomo_Chr1	5998170	5998193
Bm_sgRNA_37666	CGGACGACGCAGCCAGACAC	KWMTBOMO00189_exon_2	CGGACGACGCAGCCAGACACAGG	Bomo_Chr1	5998296	5998319
Bm_sgRNA_54713	GCGCGCGTCGCCGCCGCGAT	KWMTBOMO00189_exon_2	GCGCGCGTCGCCGCCGCGATGGG	Bomo_Chr1	5998196	5998219
Bm_sgRNA_57416	GGAATAGTGGTTGCCCATCG	KWMTBOMO00189_exon_2	GGAATAGTGGTTGCCCATCGCGG	Bomo_Chr1	5998183	5998206
Bm_sgRNA_22360	ATGGGCGGCCAGTCATGAGA	KWMTBOMO00189_exon_5	ATGGGCGGCCAGTCATGAGATGG	Bomo_Chr1	5993231	5993254
Bm_sgRNA_36368	CGATGTTGCGAATACGGGCA	KWMTBOMO00189_exon_5	CGATGTTGCGAATACGGGCAGGG	Bomo_Chr1	5992604	5992627
Bm_sgRNA_69571	TACAATATCGCCTACTCCAA	KWMTBOMO00189_exon_5	TACAATATCGCCTACTCCAAAGG	Bomo_Chr1	5992501	5992524
Bm_sgRNA_80869	TGATTCTCCCAATTTCGGGA	KWMTBOMO00189_exon_5	TGATTCTCCCAATTTCGGGATGG	Bomo_Chr1	5993724	5993747
Bm_sgRNA_88177	TTCGTAGCTGTATCTGGTCT	KWMTBOMO00189_exon_5	TTCGTAGCTGTATCTGGTCTTGG	Bomo_Chr1	5993668	5993691
Bm_sgRNA_89598	TTGGACGACCGGTCATGCCG	KWMTBOMO00189_exon_5	TTGGACGACCGGTCATGCCGCGG	Bomo_Chr1	5992457	5992480
Bm_sgRNA_01205	AAACTCTCACTCGACGCTAC	KWMTBOMO00190_exon_1	AAACTCTCACTCGACGCTACTGG	Bomo_Chr1	6026475	6026498
Bm_sgRNA_05385	AAGTTGTGCAGCAACAGGAG	KWMTBOMO00190_exon_1	AAGTTGTGCAGCAACAGGAGAGG	Bomo_Chr1	6026615	6026638
Bm_sgRNA_08587	ACAGGAGAGGATCCAACGCA	KWMTBOMO00190_exon_1	ACAGGAGAGGATCCAACGCACGG	Bomo_Chr1	6026628	6026651
Bm_sgRNA_12512	ACTTCTGCTAAATGAACCCG	KWMTBOMO00190_exon_1	ACTTCTGCTAAATGAACCCGTGG	Bomo_Chr1	6026373	6026396
Bm_sgRNA_35875	CGAGCAAGTTGTGCAGCAAC	KWMTBOMO00190_exon_1	CGAGCAAGTTGTGCAGCAACAGG	Bomo_Chr1	6026610	6026633
Bm_sgRNA_55354	GCGTTGCTCAGAACGTTGTT	KWMTBOMO00190_exon_1	GCGTTGCTCAGAACGTTGTTCGG	Bomo_Chr1	6026564	6026587
Bm_sgRNA_57891	GGAGAAGCAGTCGAGATGGT	KWMTBOMO00190_exon_1	GGAGAAGCAGTCGAGATGGTCGG	Bomo_Chr1	6026532	6026555
Bm_sgRNA_68360	TAAAGTGTTGCTCCGTGCGT	KWMTBOMO00190_exon_1	TAAAGTGTTGCTCCGTGCGTTGG	Bomo_Chr1	6026640	6026663
Bm_sgRNA_92622	TTTTGTGCGTTGTGCTGCTG	KWMTBOMO00190_exon_1	TTTTGTGCGTTGTGCTGCTGTGG	Bomo_Chr1	6026500	6026523
Bm_sgRNA_12145	ACTGGCCCTCTTATCGGTAG	KWMTBOMO00192_exon_2	ACTGGCCCTCTTATCGGTAGCGG	Bomo_Chr1	6153427	6153450
Bm_sgRNA_25781	CAACTACCGCTACCGATAAG	KWMTBOMO00192_exon_2	CAACTACCGCTACCGATAAGAGG	Bomo_Chr1	6153421	6153444
Bm_sgRNA_36562	CGCAGATGGCGAGGTGTGGG	KWMTBOMO00192_exon_2	CGCAGATGGCGAGGTGTGGGAGG	Bomo_Chr1	6153397	6153420
Bm_sgRNA_65857	GTGGTGGATGATGGCAGGAC	KWMTBOMO00192_exon_2	GTGGTGGATGATGGCAGGACTGG	Bomo_Chr1	6153445	6153468
Bm_sgRNA_66872	GTTCTCATTCGAAGCGCAAG	KWMTBOMO00192_exon_2	GTTCTCATTCGAAGCGCAAGAGG	Bomo_Chr1	6153360	6153383
Bm_sgRNA_70487	TACTGGTGGTGGATGATGGC	KWMTBOMO00192_exon_2	TACTGGTGGTGGATGATGGCAGG	Bomo_Chr1	6153450	6153473
Bm_sgRNA_61417	GGTCGTTGGAGCGTGATGCC	KWMTBOMO00192_promoter	GGTCGTTGGAGCGTGATGCCGGG	Bomo_Chr1	6157968	6157991
Bm_sgRNA_77955	TCTCGACCCGTTCGCAGCCC	KWMTBOMO00192_promoter	TCTCGACCCGTTCGCAGCCCCGG	Bomo_Chr1	6157986	6158009
Bm_sgRNA_03240	AACGAGGTGCATGTCAATAT	KWMTBOMO00193_exon_1	AACGAGGTGCATGTCAATATCGG	Bomo_Chr1	6166741	6166764
Bm_sgRNA_11565	ACTCAAGACATCCTTGATTA	KWMTBOMO00193_exon_1	ACTCAAGACATCCTTGATTAAGG	Bomo_Chr1	6166770	6166793
Bm_sgRNA_12446	ACTTCATCCGGCACGAAGAC	KWMTBOMO00193_exon_1	ACTTCATCCGGCACGAAGACTGG	Bomo_Chr1	6166888	6166911
Bm_sgRNA_17591	AGTGACTCCAAATTGGGATG	KWMTBOMO00193_exon_1	AGTGACTCCAAATTGGGATGAGG	Bomo_Chr1	6166790	6166813
Bm_sgRNA_46474	GAAGAGCACACAAGACTGGC	KWMTBOMO00193_exon_1	GAAGAGCACACAAGACTGGCTGG	Bomo_Chr1	6166926	6166949
Bm_sgRNA_49082	GAGCACACAAGACTGGCTGG	KWMTBOMO00193_exon_1	GAGCACACAAGACTGGCTGGCGG	Bomo_Chr1	6166923	6166946
Bm_sgRNA_49752	GAGGTGCATGTCAATATCGG	KWMTBOMO00193_exon_1	GAGGTGCATGTCAATATCGGCGG	Bomo_Chr1	6166744	6166767
Bm_sgRNA_68700	TAACGGATTCAAATCTGGAC	KWMTBOMO00193_exon_1	TAACGGATTCAAATCTGGACTGG	Bomo_Chr1	6166858	6166881
Bm_sgRNA_69243	TAATCTAACGGATTCAAATC	KWMTBOMO00193_exon_1	TAATCTAACGGATTCAAATCTGG	Bomo_Chr1	6166853	6166876
Bm_sgRNA_72325	TATGAGAAACAGGTTCCACA	KWMTBOMO00193_exon_1	TATGAGAAACAGGTTCCACAAGG	Bomo_Chr1	6167007	6167030
Bm_sgRNA_85889	TTACAAGATATGGCAACACT	KWMTBOMO00193_exon_1	TTACAAGATATGGCAACACTTGG	Bomo_Chr1	6166833	6166856
Bm_sgRNA_02178	AAATGACCTCGTTGGACACG	KWMTBOMO00193_promoter	AAATGACCTCGTTGGACACGCGG	Bomo_Chr1	6167147	6167170
Bm_sgRNA_38872	CGTATTCCGCGTGTCCAACG	KWMTBOMO00193_promoter	CGTATTCCGCGTGTCCAACGAGG	Bomo_Chr1	6167153	6167176
Bm_sgRNA_40188	CTACAACAAACAAAATGATA	KWMTBOMO00193_promoter	CTACAACAAACAAAATGATAAGG	Bomo_Chr1	6167208	6167231
Bm_sgRNA_49705	GAGGTACATTTTTGTGAGAA	KWMTBOMO00193_promoter	GAGGTACATTTTTGTGAGAAAGG	Bomo_Chr1	6167075	6167098
Bm_sgRNA_60816	GGGTGTTAAATGAAGACTTA	KWMTBOMO00193_promoter	GGGTGTTAAATGAAGACTTAGGG	Bomo_Chr1	6167386	6167409
Bm_sgRNA_24877	CAAAAAGCTCTGAATAATTT	KWMTBOMO00194_exon_1	CAAAAAGCTCTGAATAATTTGGG	Bomo_Chr1	6174011	6174034
Bm_sgRNA_30963	CCAAATTATTCAGAGCTTTT	KWMTBOMO00194_exon_1	CCAAATTATTCAGAGCTTTTTGG	Bomo_Chr1	6174010	6174033
Bm_sgRNA_52853	GCAGTTGGTCCATTGTGCGT	KWMTBOMO00194_exon_2	GCAGTTGGTCCATTGTGCGTCGG	Bomo_Chr1	6175469	6175492
Bm_sgRNA_61658	GGTGCCCCTTTAATATGCAA	KWMTBOMO00194_exon_2	GGTGCCCCTTTAATATGCAAAGG	Bomo_Chr1	6175420	6175443
Bm_sgRNA_63487	GTATTTCTTAAGGTATGCAC	KWMTBOMO00194_exon_2	GTATTTCTTAAGGTATGCACTGG	Bomo_Chr1	6175523	6175546
Bm_sgRNA_81861	TGCGTCGGGGGCCATTAACA	KWMTBOMO00194_exon_2	TGCGTCGGGGGCCATTAACATGG	Bomo_Chr1	6175454	6175477
Bm_sgRNA_50122	GATAACCCGCCTCTGCTCTG	KWMTBOMO00194_promoter	GATAACCCGCCTCTGCTCTGTGG	Bomo_Chr1	6173773	6173796
Bm_sgRNA_84991	TGTTATCTACCACAGAGCAG	KWMTBOMO00194_promoter	TGTTATCTACCACAGAGCAGAGG	Bomo_Chr1	6173782	6173805
Bm_sgRNA_89541	TTGCTTCGTTGCTTCGATAA	KWMTBOMO00195_exon_3	TTGCTTCGTTGCTTCGATAAAGG	Bomo_Chr1	6179916	6179939
Bm_sgRNA_09805	ACCGCTCGGGAGCCTCTACT	KWMTBOMO00195_exon_4	ACCGCTCGGGAGCCTCTACTTGG	Bomo_Chr1	6179736	6179759
Bm_sgRNA_20716	ATCGAAGCGATTGGGACTGT	KWMTBOMO00195_exon_4	ATCGAAGCGATTGGGACTGTCGG	Bomo_Chr1	6179633	6179656
Bm_sgRNA_26284	CAAGTTATTAGTGAGACGGT	KWMTBOMO00195_exon_4	CAAGTTATTAGTGAGACGGTCGG	Bomo_Chr1	6179547	6179570
Bm_sgRNA_49999	GAGTTCAAGACCAATCTGCT	KWMTBOMO00195_exon_4	GAGTTCAAGACCAATCTGCTTGG	Bomo_Chr1	6179507	6179530
Bm_sgRNA_87726	TTCCGTCATTGTCTCGATTG	KWMTBOMO00195_exon_4	TTCCGTCATTGTCTCGATTGCGG	Bomo_Chr1	6179758	6179781
Bm_sgRNA_10074	ACCTGAGTTTTATCCACACC	KWMTBOMO00196_exon_1	ACCTGAGTTTTATCCACACCTGG	Bomo_Chr1	6185539	6185562
Bm_sgRNA_16761	AGGTGCATCTGGATTAAGCG	KWMTBOMO00196_exon_1	AGGTGCATCTGGATTAAGCGCGG	Bomo_Chr1	6185520	6185543
Bm_sgRNA_42692	CTGCCGTCGTATTTTGATTT	KWMTBOMO00196_exon_1	CTGCCGTCGTATTTTGATTTCGG	Bomo_Chr1	6185464	6185487
Bm_sgRNA_53360	GCCAGGTGTGGATAAAACTC	KWMTBOMO00196_exon_1	GCCAGGTGTGGATAAAACTCAGG	Bomo_Chr1	6185540	6185563
Bm_sgRNA_73738	TCACAAAGCTCGCTCAACAA	KWMTBOMO00196_exon_1	TCACAAAGCTCGCTCAACAAAGG	Bomo_Chr1	6185441	6185464
Bm_sgRNA_80473	TGAGTTTTATCCACACCTGG	KWMTBOMO00196_exon_1	TGAGTTTTATCCACACCTGGCGG	Bomo_Chr1	6185542	6185565
Bm_sgRNA_84867	TGTGTGACTGCCGCCAGGTG	KWMTBOMO00196_exon_1	TGTGTGACTGCCGCCAGGTGTGG	Bomo_Chr1	6185552	6185575
Bm_sgRNA_02041	AAATCATACGAAGAGCTCAT	KWMTBOMO00196_exon_2	AAATCATACGAAGAGCTCATCGG	Bomo_Chr1	6191538	6191561
Bm_sgRNA_47723	GACATCGACTTGACAGTTGA	KWMTBOMO00196_promoter	GACATCGACTTGACAGTTGATGG	Bomo_Chr1	6185390	6185413
Bm_sgRNA_07520	ACAAACGAATATGCTACTGT	KWMTBOMO00197_exon_1	ACAAACGAATATGCTACTGTCGG	Bomo_Chr1	6204165	6204188
Bm_sgRNA_25287	CAAATAATCGAGAAGAATGC	KWMTBOMO00197_exon_1	CAAATAATCGAGAAGAATGCTGG	Bomo_Chr1	6204142	6204165
Bm_sgRNA_72423	TATGCTACTGTCGGTCTTCG	KWMTBOMO00197_exon_1	TATGCTACTGTCGGTCTTCGAGG	Bomo_Chr1	6204174	6204197
Bm_sgRNA_13668	AGACTCGCAGGCGCGGCAAC	KWMTBOMO00197_exon_2	AGACTCGCAGGCGCGGCAACTGG	Bomo_Chr1	6204920	6204943
Bm_sgRNA_40183	CTACAAATGGAGAGACTCGC	KWMTBOMO00197_exon_2	CTACAAATGGAGAGACTCGCAGG	Bomo_Chr1	6204908	6204931
Bm_sgRNA_47406	GAATTTCGATAATCAGCAAA	KWMTBOMO00197_exon_2	GAATTTCGATAATCAGCAAATGG	Bomo_Chr1	6204869	6204892
Bm_sgRNA_07450	ACAAAAAAACAATTGTCCAC	KWMTBOMO00197_promoter	ACAAAAAAACAATTGTCCACAGG	Bomo_Chr1	6204014	6204037
Bm_sgRNA_43054	CTGGCGCATTCGTCCGCTTC	KWMTBOMO00197_promoter	CTGGCGCATTCGTCCGCTTCCGG	Bomo_Chr1	6204051	6204074
Bm_sgRNA_90229	TTGTTAGTTGAACATGCTAA	KWMTBOMO00197_promoter	TTGTTAGTTGAACATGCTAACGG	Bomo_Chr1	6203988	6204011
Bm_sgRNA_14228	AGATCCATCCGTTCTTTTCT	KWMTBOMO00198_exon_1	AGATCCATCCGTTCTTTTCTCGG	Bomo_Chr1	6217864	6217887
Bm_sgRNA_19091	ATACTAGTCGCACAGAGTCG	KWMTBOMO00198_exon_1	ATACTAGTCGCACAGAGTCGTGG	Bomo_Chr1	6218098	6218121
Bm_sgRNA_63559	GTCAATAGCATGTTCAAGTT	KWMTBOMO00198_exon_1	GTCAATAGCATGTTCAAGTTCGG	Bomo_Chr1	6217910	6217933
Bm_sgRNA_85003	TGTTCAAGTTCGGCGAGAAT	KWMTBOMO00198_exon_1	TGTTCAAGTTCGGCGAGAATTGG	Bomo_Chr1	6217900	6217923
Bm_sgRNA_86322	TTAGATGTTGATTTAAACTC	KWMTBOMO00198_exon_1	TTAGATGTTGATTTAAACTCAGG	Bomo_Chr1	6218279	6218302
Bm_sgRNA_87385	TTCATATTCAGTATGCTTCT	KWMTBOMO00198_exon_1	TTCATATTCAGTATGCTTCTCGG	Bomo_Chr1	6218014	6218037
Bm_sgRNA_90475	TTTAATTTAAAATTCGTCAA	KWMTBOMO00198_promoter	TTTAATTTAAAATTCGTCAATGG	Bomo_Chr1	6218394	6218417
Bm_sgRNA_15751	AGCTGTCTTGCTGCTCGTCG	KWMTBOMO00199_exon_2	AGCTGTCTTGCTGCTCGTCGAGG	Bomo_Chr1	6261790	6261813
Bm_sgRNA_64314	GTCGGAGGATGATGAAGTGA	KWMTBOMO00199_exon_2	GTCGGAGGATGATGAAGTGAGGG	Bomo_Chr1	6261834	6261857
Bm_sgRNA_11417	ACTAGCAGTGACGTCCTTGT	KWMTBOMO00199_exon_3	ACTAGCAGTGACGTCCTTGTCGG	Bomo_Chr1	6244346	6244369
Bm_sgRNA_49288	GAGCGGCCTGATTGCCGACA	KWMTBOMO00199_exon_3	GAGCGGCCTGATTGCCGACAAGG	Bomo_Chr1	6244360	6244383
Bm_sgRNA_55599	GCTAGTTCTTGTTATAACGA	KWMTBOMO00199_exon_3	GCTAGTTCTTGTTATAACGATGG	Bomo_Chr1	6244329	6244352
Bm_sgRNA_58680	GGCAACGTCGCGCCGCAGAA	KWMTBOMO00199_exon_3	GGCAACGTCGCGCCGCAGAACGG	Bomo_Chr1	6244308	6244331
Bm_sgRNA_79978	TGACGTCCTTGTCGGCAATC	KWMTBOMO00199_exon_3	TGACGTCCTTGTCGGCAATCAGG	Bomo_Chr1	6244354	6244377
Bm_sgRNA_40854	CTATGTTCGACGTCAGGGTG	KWMTBOMO00199_promoter	CTATGTTCGACGTCAGGGTGTGG	Bomo_Chr1	6273132	6273155
Bm_sgRNA_86484	TTAGTCTATGTTCGACGTCA	KWMTBOMO00199_promoter	TTAGTCTATGTTCGACGTCAGGG	Bomo_Chr1	6273127	6273150
Bm_sgRNA_39815	CGTTTAAAGCGCACGATCGC	KWMTBOMO00200_exon_1	CGTTTAAAGCGCACGATCGCAGG	Bomo_Chr1	6273254	6273277
Bm_sgRNA_46236	GAACTCTCTTTTTATACGTT	KWMTBOMO00200_exon_1	GAACTCTCTTTTTATACGTTTGG	Bomo_Chr1	6273342	6273365
Bm_sgRNA_15919	AGGAAGGTCCCACCTTCATA	KWMTBOMO00200_exon_2	AGGAAGGTCCCACCTTCATAAGG	Bomo_Chr1	6277180	6277203
Bm_sgRNA_24060	ATTGGTGGCTCCATAAAATT	KWMTBOMO00200_exon_2	ATTGGTGGCTCCATAAAATTGGG	Bomo_Chr1	6277099	6277122
Bm_sgRNA_58612	GGATTGAAAGGATAAGTTTC	KWMTBOMO00200_exon_2	GGATTGAAAGGATAAGTTTCGGG	Bomo_Chr1	6277219	6277242
Bm_sgRNA_83118	TGGGACTCGTGAATGAGAAT	KWMTBOMO00200_exon_2	TGGGACTCGTGAATGAGAATTGG	Bomo_Chr1	6277118	6277141
Bm_sgRNA_89073	TTGATACTCCTTATGAAGGT	KWMTBOMO00200_exon_2	TTGATACTCCTTATGAAGGTGGG	Bomo_Chr1	6277172	6277195
Bm_sgRNA_40854	CTATGTTCGACGTCAGGGTG	KWMTBOMO00200_promoter	CTATGTTCGACGTCAGGGTGTGG	Bomo_Chr1	6273132	6273155
Bm_sgRNA_86484	TTAGTCTATGTTCGACGTCA	KWMTBOMO00200_promoter	TTAGTCTATGTTCGACGTCAGGG	Bomo_Chr1	6273127	6273150
Bm_sgRNA_25598	CAACCAAAACTGCTGCCGTT	KWMTBOMO00201_exon_2	CAACCAAAACTGCTGCCGTTTGG	Bomo_Chr1	6281791	6281814
Bm_sgRNA_52540	GCAGCAGTTTTGGTTGTTTC	KWMTBOMO00201_exon_2	GCAGCAGTTTTGGTTGTTTCTGG	Bomo_Chr1	6281798	6281821
Bm_sgRNA_52859	GCAGTTTTGGTTGTTTCTGG	KWMTBOMO00201_exon_2	GCAGTTTTGGTTGTTTCTGGAGG	Bomo_Chr1	6281801	6281824
Bm_sgRNA_56242	GCTGCCGTTTGGTACTTCAC	KWMTBOMO00201_exon_2	GCTGCCGTTTGGTACTTCACCGG	Bomo_Chr1	6281780	6281803
Bm_sgRNA_62665	GTACCAAACGGCAGCAGTTT	KWMTBOMO00201_exon_2	GTACCAAACGGCAGCAGTTTTGG	Bomo_Chr1	6281788	6281811
Bm_sgRNA_70159	TACGCCGGTGAAGTACCAAA	KWMTBOMO00201_exon_2	TACGCCGGTGAAGTACCAAACGG	Bomo_Chr1	6281776	6281799
Bm_sgRNA_90604	TTTAGACACGCACGTTTTGT	KWMTBOMO00201_exon_2	TTTAGACACGCACGTTTTGTTGG	Bomo_Chr1	6281703	6281726
Bm_sgRNA_08613	ACAGGCCCAACGAGTTATTC	KWMTBOMO00202_exon_1	ACAGGCCCAACGAGTTATTCTGG	Bomo_Chr1	6333410	6333433
Bm_sgRNA_19593	ATATATGCGTAGTGCAACAC	KWMTBOMO00202_exon_1	ATATATGCGTAGTGCAACACAGG	Bomo_Chr1	6333392	6333415
Bm_sgRNA_28762	CAGGAGCCTAAATTCACTCG	KWMTBOMO00202_exon_1	CAGGAGCCTAAATTCACTCGAGG	Bomo_Chr1	6333295	6333318
Bm_sgRNA_39622	CGTTATCCAGAATAACTCGT	KWMTBOMO00202_exon_1	CGTTATCCAGAATAACTCGTTGG	Bomo_Chr1	6333416	6333439
Bm_sgRNA_66470	GTTATCCAGAATAACTCGTT	KWMTBOMO00202_exon_1	GTTATCCAGAATAACTCGTTGGG	Bomo_Chr1	6333415	6333438
Bm_sgRNA_00795	AAACAAAATCTAGACGGCAA	KWMTBOMO00202_promoter	AAACAAAATCTAGACGGCAACGG	Bomo_Chr1	6333230	6333253
Bm_sgRNA_69467	TAATTTCTTATTAACTGAGA	KWMTBOMO00202_promoter	TAATTTCTTATTAACTGAGATGG	Bomo_Chr1	6333089	6333112
Bm_sgRNA_14265	AGATCTAAAATATCTTGCAG	KWMTBOMO00203_exon_3	AGATCTAAAATATCTTGCAGGGG	Bomo_Chr1	6342288	6342311
Bm_sgRNA_35222	CGAAGATTTGTGCTGCATGT	KWMTBOMO00203_exon_3	CGAAGATTTGTGCTGCATGTTGG	Bomo_Chr1	6342319	6342342
Bm_sgRNA_49007	GAGATCTAAAATATCTTGCA	KWMTBOMO00203_exon_3	GAGATCTAAAATATCTTGCAGGG	Bomo_Chr1	6342289	6342312
Bm_sgRNA_84696	TGTGCTGCATGTTGGAGTGC	KWMTBOMO00203_exon_3	TGTGCTGCATGTTGGAGTGCTGG	Bomo_Chr1	6342311	6342334
Bm_sgRNA_13245	AGAATATAACCCGATTCGTC	KWMTBOMO00204_exon_3	AGAATATAACCCGATTCGTCTGG	Bomo_Chr1	6370274	6370297
Bm_sgRNA_41179	CTCATGAATGGAACATCACA	KWMTBOMO00204_exon_3	CTCATGAATGGAACATCACAAGG	Bomo_Chr1	6370341	6370364
Bm_sgRNA_46120	GAACGATGACCAGACGAATC	KWMTBOMO00204_exon_3	GAACGATGACCAGACGAATCGGG	Bomo_Chr1	6370265	6370288
Bm_sgRNA_67791	GTTTGGAAGGTGTCGCATTC	KWMTBOMO00204_exon_3	GTTTGGAAGGTGTCGCATTCAGG	Bomo_Chr1	6370228	6370251
Bm_sgRNA_74780	TCATGAATGGAACATCACAA	KWMTBOMO00204_exon_3	TCATGAATGGAACATCACAAGGG	Bomo_Chr1	6370340	6370363
Bm_sgRNA_78483	TCTGGTCATCGTTCAGCATA	KWMTBOMO00204_exon_3	TCTGGTCATCGTTCAGCATACGG	Bomo_Chr1	6370256	6370279
Bm_sgRNA_89380	TTGCGACGCACATGTTTGGA	KWMTBOMO00204_exon_3	TTGCGACGCACATGTTTGGAAGG	Bomo_Chr1	6370215	6370238
Bm_sgRNA_91804	TTTGGAAGGTGTCGCATTCA	KWMTBOMO00204_exon_3	TTTGGAAGGTGTCGCATTCAGGG	Bomo_Chr1	6370229	6370252
Bm_sgRNA_00750	AAAATTGAAATTCGCTGATA	KWMTBOMO00206_exon_1	AAAATTGAAATTCGCTGATAAGG	Bomo_Chr1	6420340	6420363
Bm_sgRNA_11351	ACTACAGCGGCAAGTTGAAG	KWMTBOMO00206_exon_1	ACTACAGCGGCAAGTTGAAGAGG	Bomo_Chr1	6420661	6420684
Bm_sgRNA_34206	CCTCGATGCCAAAAAAGACA	KWMTBOMO00206_exon_1	CCTCGATGCCAAAAAAGACAAGG	Bomo_Chr1	6420379	6420402
Bm_sgRNA_34883	CCTTGTCTTTTTTGGCATCG	KWMTBOMO00206_exon_1	CCTTGTCTTTTTTGGCATCGAGG	Bomo_Chr1	6420379	6420402
Bm_sgRNA_64806	GTCTTTTTTGGCATCGAGGA	KWMTBOMO00206_exon_1	GTCTTTTTTGGCATCGAGGAAGG	Bomo_Chr1	6420383	6420406
Bm_sgRNA_67435	GTTGTGAGTGAGACTACAAC	KWMTBOMO00206_exon_1	GTTGTGAGTGAGACTACAACAGG	Bomo_Chr1	6420536	6420559
Bm_sgRNA_05170	AAGTCGTCACGGGTCCATAT	KWMTBOMO00207_exon_2	AAGTCGTCACGGGTCCATATCGG	Bomo_Chr1	6424651	6424674
Bm_sgRNA_11069	ACGTCAGAGCTGATAGGAGG	KWMTBOMO00207_exon_2	ACGTCAGAGCTGATAGGAGGCGG	Bomo_Chr1	6424753	6424776
Bm_sgRNA_19725	ATATGAACTTGGGTCCGATA	KWMTBOMO00207_exon_2	ATATGAACTTGGGTCCGATATGG	Bomo_Chr1	6424637	6424660
Bm_sgRNA_28641	CAGCTCTGACGTAGCTGTAG	KWMTBOMO00207_exon_2	CAGCTCTGACGTAGCTGTAGTGG	Bomo_Chr1	6424742	6424765
Bm_sgRNA_38936	CGTCAGAGCTGATAGGAGGC	KWMTBOMO00207_exon_2	CGTCAGAGCTGATAGGAGGCGGG	Bomo_Chr1	6424754	6424777
Bm_sgRNA_55522	GCTACGTCAGAGCTGATAGG	KWMTBOMO00207_exon_2	GCTACGTCAGAGCTGATAGGAGG	Bomo_Chr1	6424750	6424773
Bm_sgRNA_12927	AGAAATGTAGCAACTGTGTC	KWMTBOMO00208_exon_1	AGAAATGTAGCAACTGTGTCGGG	Bomo_Chr1	6446138	6446161
Bm_sgRNA_27971	CAGAAATGTAGCAACTGTGT	KWMTBOMO00208_exon_1	CAGAAATGTAGCAACTGTGTCGG	Bomo_Chr1	6446139	6446162
Bm_sgRNA_50848	GATGACATCTGCAGTTGTGC	KWMTBOMO00208_exon_1	GATGACATCTGCAGTTGTGCTGG	Bomo_Chr1	6446173	6446196
Bm_sgRNA_53143	GCATTGGTTTCAACATCTCG	KWMTBOMO00208_exon_1	GCATTGGTTTCAACATCTCGAGG	Bomo_Chr1	6446069	6446092
Bm_sgRNA_73766	TCACAATTTAATGCAACCGA	KWMTBOMO00208_exon_1	TCACAATTTAATGCAACCGAAGG	Bomo_Chr1	6446093	6446116
Bm_sgRNA_78539	TCTGTATGTACGCCCCGTCT	KWMTBOMO00208_exon_1	TCTGTATGTACGCCCCGTCTAGG	Bomo_Chr1	6446204	6446227
Bm_sgRNA_35390	CGAATTTATCAACATTGCAA	KWMTBOMO00208_promoter	CGAATTTATCAACATTGCAAAGG	Bomo_Chr1	6446358	6446381
Bm_sgRNA_85309	TGTTTCCTACAAAACAACAC	KWMTBOMO00208_promoter	TGTTTCCTACAAAACAACACTGG	Bomo_Chr1	6446327	6446350
Bm_sgRNA_33369	CCGGAAAAGTAAAGCTTTCC	KWMTBOMO00209_exon_2	CCGGAAAAGTAAAGCTTTCCAGG	Bomo_Chr1	6457472	6457495
Bm_sgRNA_40289	CTACCCGGCATTCTACACGC	KWMTBOMO00209_exon_2	CTACCCGGCATTCTACACGCTGG	Bomo_Chr1	6457186	6457209
Bm_sgRNA_58723	GGCACCAGCGTGTAGAATGC	KWMTBOMO00209_exon_2	GGCACCAGCGTGTAGAATGCCGG	Bomo_Chr1	6457182	6457205
Bm_sgRNA_68774	TAACTGACCAAGCCGTTGAC	KWMTBOMO00209_exon_2	TAACTGACCAAGCCGTTGACGGG	Bomo_Chr1	6457070	6457093
Bm_sgRNA_75935	TCCTCGGTGGGCAAAGGCGG	KWMTBOMO00209_exon_2	TCCTCGGTGGGCAAAGGCGGGGG	Bomo_Chr1	6457509	6457532
Bm_sgRNA_83855	TGTAGAATGCCGGGTAGAAC	KWMTBOMO00209_exon_2	TGTAGAATGCCGGGTAGAACTGG	Bomo_Chr1	6457192	6457215
Bm_sgRNA_06189	AATCGATTAGTACAGTTTAT	KWMTBOMO00210_exon_1	AATCGATTAGTACAGTTTATTGG	Bomo_Chr1	6575202	6575225
Bm_sgRNA_28200	CAGATCCCAACAAACAAAAA	KWMTBOMO00210_exon_2	CAGATCCCAACAAACAAAAATGG	Bomo_Chr1	6574527	6574550
Bm_sgRNA_41085	CTCAGCCCATTTTTGTTTGT	KWMTBOMO00210_exon_2	CTCAGCCCATTTTTGTTTGTTGG	Bomo_Chr1	6574521	6574544
Bm_sgRNA_50404	GATATTCAACAAAGTGAAAG	KWMTBOMO00210_exon_2	GATATTCAACAAAGTGAAAGAGG	Bomo_Chr1	6574496	6574519
Bm_sgRNA_92266	TTTTATCTGATTCACACAAA	KWMTBOMO00210_exon_2	TTTTATCTGATTCACACAAAAGG	Bomo_Chr1	6574464	6574487
Bm_sgRNA_90591	TTTAGAAGTAGATGGTTGGG	KWMTBOMO00210_exon_3	TTTAGAAGTAGATGGTTGGGAGG	Bomo_Chr1	6574300	6574323
Bm_sgRNA_92380	TTTTCCGCACACGCACTCCT	KWMTBOMO00210_exon_3	TTTTCCGCACACGCACTCCTAGG	Bomo_Chr1	6574274	6574297
Bm_sgRNA_74179	TCAGAGCTAGACTTATATCC	KWMTBOMO00210_promoter	TCAGAGCTAGACTTATATCCAGG	Bomo_Chr1	6575279	6575302
Bm_sgRNA_92585	TTTTGTAAAAGATGAGGATG	KWMTBOMO00210_promoter	TTTTGTAAAAGATGAGGATGAGG	Bomo_Chr1	6575306	6575329
Bm_sgRNA_11258	ACGTTTTCAAGGCTCCTTGA	KWMTBOMO00211_exon_2	ACGTTTTCAAGGCTCCTTGACGG	Bomo_Chr1	6580000	6580023
Bm_sgRNA_30629	CATTGAACACGCGCATTGCT	KWMTBOMO00211_exon_2	CATTGAACACGCGCATTGCTTGG	Bomo_Chr1	6579784	6579807
Bm_sgRNA_39743	CGTTGACGCAGAGTAATCTT	KWMTBOMO00211_exon_2	CGTTGACGCAGAGTAATCTTGGG	Bomo_Chr1	6580574	6580597
Bm_sgRNA_55106	GCGGTCGTACACGCTACGGA	KWMTBOMO00211_exon_2	GCGGTCGTACACGCTACGGATGG	Bomo_Chr1	6580669	6580692
Bm_sgRNA_59123	GGCCGAAAGTGCCATGAGAG	KWMTBOMO00211_exon_2	GGCCGAAAGTGCCATGAGAGCGG	Bomo_Chr1	6580301	6580324
Bm_sgRNA_63899	GTCCATGACGTGTGCAATGA	KWMTBOMO00211_exon_2	GTCCATGACGTGTGCAATGAAGG	Bomo_Chr1	6580144	6580167
Bm_sgRNA_08548	ACAGCTGTCGGACCTGGGAC	KWMTBOMO00211_exon_5	ACAGCTGTCGGACCTGGGACAGG	Bomo_Chr1	6602679	6602702
Bm_sgRNA_20526	ATCCCTACAGCTGTCGGACC	KWMTBOMO00211_exon_5	ATCCCTACAGCTGTCGGACCTGG	Bomo_Chr1	6602685	6602708
Bm_sgRNA_26404	CAATCATCTACTCCTGTCCC	KWMTBOMO00211_exon_5	CAATCATCTACTCCTGTCCCAGG	Bomo_Chr1	6602667	6602690
Bm_sgRNA_60067	GGGACAGGAGTAGATGATTG	KWMTBOMO00211_exon_5	GGGACAGGAGTAGATGATTGTGG	Bomo_Chr1	6602664	6602687
Bm_sgRNA_75412	TCCCAGGTCCGACAGCTGTA	KWMTBOMO00211_exon_5	TCCCAGGTCCGACAGCTGTAGGG	Bomo_Chr1	6602683	6602706
Bm_sgRNA_75534	TCCCTACAGCTGTCGGACCT	KWMTBOMO00211_exon_5	TCCCTACAGCTGTCGGACCTGGG	Bomo_Chr1	6602684	6602707
Bm_sgRNA_28358	CAGCATAGCAACCTCGGCGG	KWMTBOMO00212_exon_2	CAGCATAGCAACCTCGGCGGAGG	Bomo_Chr1	6743901	6743924
Bm_sgRNA_37892	CGGCAGCATAGCAACCTCGG	KWMTBOMO00212_exon_2	CGGCAGCATAGCAACCTCGGCGG	Bomo_Chr1	6743898	6743921
Bm_sgRNA_70960	TAGCGGCAGCATAGCAACCT	KWMTBOMO00212_exon_2	TAGCGGCAGCATAGCAACCTCGG	Bomo_Chr1	6743895	6743918
Bm_sgRNA_74689	TCATCCAGTCGTGTTGCTGC	KWMTBOMO00212_exon_2	TCATCCAGTCGTGTTGCTGCTGG	Bomo_Chr1	6743929	6743952
Bm_sgRNA_82147	TGCTGGCGAAGCCTCCGCCG	KWMTBOMO00212_exon_2	TGCTGGCGAAGCCTCCGCCGAGG	Bomo_Chr1	6743912	6743935
Bm_sgRNA_87999	TTCGCCAGCAGCAACACGAC	KWMTBOMO00212_exon_2	TTCGCCAGCAGCAACACGACTGG	Bomo_Chr1	6743925	6743948
Bm_sgRNA_08770	ACAGTTTCTTCCTCGGCAAT	KWMTBOMO00212_exon_9	ACAGTTTCTTCCTCGGCAATGGG	Bomo_Chr1	6667007	6667030
Bm_sgRNA_35094	CGAACAGAGCTGCATTGAAG	KWMTBOMO00212_exon_9	CGAACAGAGCTGCATTGAAGAGG	Bomo_Chr1	6667038	6667061
Bm_sgRNA_59732	GGCTAATGAACCCATTGCCG	KWMTBOMO00212_exon_9	GGCTAATGAACCCATTGCCGAGG	Bomo_Chr1	6667017	6667040
Bm_sgRNA_73680	TCAATGCAGCTCTGTTCGTC	KWMTBOMO00212_exon_9	TCAATGCAGCTCTGTTCGTCCGG	Bomo_Chr1	6667043	6667066
Bm_sgRNA_88620	TTCTTCACAGCTGATCGACT	KWMTBOMO00212_exon_9	TTCTTCACAGCTGATCGACTTGG	Bomo_Chr1	6667079	6667102
Bm_sgRNA_29229	CAGTGTTGCGCGAACTGTTC	KWMTBOMO00213_exon_11	CAGTGTTGCGCGAACTGTTCGGG	Bomo_Chr1	6798185	6798208
Bm_sgRNA_49835	GAGTAGGTCGAGGGTGAGGG	KWMTBOMO00213_exon_11	GAGTAGGTCGAGGGTGAGGGCGG	Bomo_Chr1	6798261	6798284
Bm_sgRNA_59597	GGCGGGGGGAGATCGTGCGA	KWMTBOMO00213_exon_11	GGCGGGGGGAGATCGTGCGATGG	Bomo_Chr1	6798298	6798321
Bm_sgRNA_65318	GTGCGCTCTTGTTCACGAAA	KWMTBOMO00213_exon_11	GTGCGCTCTTGTTCACGAAAAGG	Bomo_Chr1	6798224	6798247
Bm_sgRNA_74508	TCAGTGTTGCGCGAACTGTT	KWMTBOMO00213_exon_11	TCAGTGTTGCGCGAACTGTTCGG	Bomo_Chr1	6798184	6798207
Bm_sgRNA_07490	ACAAAATGCGCATTGTACTG	KWMTBOMO00213_exon_12	ACAAAATGCGCATTGTACTGTGG	Bomo_Chr1	6797550	6797573
Bm_sgRNA_59119	GGCCCTGTGTTGGCTCGGTC	KWMTBOMO00213_exon_12	GGCCCTGTGTTGGCTCGGTCTGG	Bomo_Chr1	6797342	6797365
Bm_sgRNA_76834	TCGGATAACGGACTGGGAGT	KWMTBOMO00213_exon_12	TCGGATAACGGACTGGGAGTTGG	Bomo_Chr1	6797641	6797664
Bm_sgRNA_20837	ATCGCCTGGTGATCATTTAA	KWMTBOMO00213_exon_2	ATCGCCTGGTGATCATTTAAAGG	Bomo_Chr1	6815357	6815380
Bm_sgRNA_44053	CTTCATTTTTATATGATTCT	KWMTBOMO00213_exon_2	CTTCATTTTTATATGATTCTGGG	Bomo_Chr1	6815312	6815335
Bm_sgRNA_45929	GAACACGGAAAGGTAAATTT	KWMTBOMO00213_exon_2	GAACACGGAAAGGTAAATTTTGG	Bomo_Chr1	6815272	6815295
Bm_sgRNA_78733	TCTTCATTTTTATATGATTC	KWMTBOMO00213_exon_2	TCTTCATTTTTATATGATTCTGG	Bomo_Chr1	6815311	6815334
Bm_sgRNA_86909	TTATTCTGTGAAGTATCGCC	KWMTBOMO00213_exon_2	TTATTCTGTGAAGTATCGCCTGG	Bomo_Chr1	6815371	6815394
Bm_sgRNA_68875	TAAGATCACTAAAGCAGTGT	KWMTBOMO00213_exon_3	TAAGATCACTAAAGCAGTGTTGG	Bomo_Chr1	6814640	6814663
Bm_sgRNA_04450	AAGCCATAGAAGACTACTTC	KWMTBOMO00213_promoter	AAGCCATAGAAGACTACTTCAGG	Bomo_Chr1	6816129	6816152
Bm_sgRNA_10396	ACGAGTCTTTCGTAACAGTT	KWMTBOMO00213_promoter	ACGAGTCTTTCGTAACAGTTTGG	Bomo_Chr1	6816190	6816213
Bm_sgRNA_46072	GAACCTGAAGTAGTCTTCTA	KWMTBOMO00213_promoter	GAACCTGAAGTAGTCTTCTATGG	Bomo_Chr1	6816132	6816155
Bm_sgRNA_00050	AAAAAACTATTACCTATAAA	KWMTBOMO00214_exon_2	AAAAAACTATTACCTATAAAAGG	Bomo_Chr1	6849500	6849523
Bm_sgRNA_00068	AAAAAATAATGTCCTTTTAT	KWMTBOMO00214_exon_2	AAAAAATAATGTCCTTTTATAGG	Bomo_Chr1	6849488	6849511
Bm_sgRNA_02831	AACATAATTGTTTTGGACTT	KWMTBOMO00214_exon_2	AACATAATTGTTTTGGACTTTGG	Bomo_Chr1	6849551	6849574
Bm_sgRNA_90219	TTGTTAACTTGCATTTTAGA	KWMTBOMO00214_exon_2	TTGTTAACTTGCATTTTAGACGG	Bomo_Chr1	6849521	6849544
Bm_sgRNA_39376	CGTGCGTATGTTGTCAAATA	KWMTBOMO00214_exon_3	CGTGCGTATGTTGTCAAATATGG	Bomo_Chr1	6842725	6842748
Bm_sgRNA_67391	GTTGTCAAATATGGGACAAG	KWMTBOMO00214_exon_3	GTTGTCAAATATGGGACAAGCGG	Bomo_Chr1	6842734	6842757
Bm_sgRNA_36934	CGCCTACACGGTGGCGTTTA	KWMTBOMO00215_exon_1	CGCCTACACGGTGGCGTTTAAGG	Bomo_Chr1	6857514	6857537
Bm_sgRNA_38725	CGTACGTCTACCCACAGCTG	KWMTBOMO00215_exon_1	CGTACGTCTACCCACAGCTGAGG	Bomo_Chr1	6857423	6857446
Bm_sgRNA_51435	GATTGAAGACGCCTACACGG	KWMTBOMO00215_exon_1	GATTGAAGACGCCTACACGGTGG	Bomo_Chr1	6857505	6857528
Bm_sgRNA_59274	GGCCTTAAACGCCACCGTGT	KWMTBOMO00215_exon_1	GGCCTTAAACGCCACCGTGTAGG	Bomo_Chr1	6857516	6857539
Bm_sgRNA_70292	TACGTCTACCCACAGCTGAG	KWMTBOMO00215_exon_1	TACGTCTACCCACAGCTGAGGGG	Bomo_Chr1	6857425	6857448
Bm_sgRNA_75861	TCCTAAAACCCCCTCAGCTG	KWMTBOMO00215_exon_1	TCCTAAAACCCCCTCAGCTGTGG	Bomo_Chr1	6857434	6857457
Bm_sgRNA_31535	CCACTTTTCGAAAATCGTTA	KWMTBOMO00215_exon_2	CCACTTTTCGAAAATCGTTACGG	Bomo_Chr1	6857892	6857915
Bm_sgRNA_33648	CCGTAACGATTTTCGAAAAG	KWMTBOMO00215_exon_2	CCGTAACGATTTTCGAAAAGTGG	Bomo_Chr1	6857892	6857915
Bm_sgRNA_35370	CGAATTCAAAACGGGTATCG	KWMTBOMO00215_exon_2	CGAATTCAAAACGGGTATCGAGG	Bomo_Chr1	6857862	6857885
Bm_sgRNA_37357	CGCTCACCGCCTCCCTCCCT	KWMTBOMO00215_exon_6	CGCTCACCGCCTCCCTCCCTCGG	Bomo_Chr1	6894587	6894610
Bm_sgRNA_44005	CTTCATAAAGGTGCCGAGGG	KWMTBOMO00215_exon_6	CTTCATAAAGGTGCCGAGGGAGG	Bomo_Chr1	6894574	6894597
Bm_sgRNA_48344	GACGTACGAATACGGGGGTT	KWMTBOMO00215_exon_6	GACGTACGAATACGGGGGTTTGG	Bomo_Chr1	6894399	6894422
Bm_sgRNA_48897	GAGAGCGACGTACGAATACG	KWMTBOMO00215_exon_6	GAGAGCGACGTACGAATACGGGG	Bomo_Chr1	6894405	6894428
Bm_sgRNA_54180	GCCTTAATTTCGCTGTTCCC	KWMTBOMO00215_exon_6	GCCTTAATTTCGCTGTTCCCGGG	Bomo_Chr1	6894344	6894367
Bm_sgRNA_62792	GTACGTCGCTCTCATTACGA	KWMTBOMO00215_exon_6	GTACGTCGCTCTCATTACGATGG	Bomo_Chr1	6894415	6894438
Bm_sgRNA_23125	ATTAGGTCGCCACTGTTATG	KWMTBOMO00216_exon_2	ATTAGGTCGCCACTGTTATGTGG	Bomo_Chr1	6941946	6941969
Bm_sgRNA_65725	GTGGGCATACATAATAGCTG	KWMTBOMO00216_exon_2	GTGGGCATACATAATAGCTGCGG	Bomo_Chr1	6941927	6941950
Bm_sgRNA_18189	AGTTGGTAAGGTTGGGTCGA	KWMTBOMO00216_exon_4	AGTTGGTAAGGTTGGGTCGAAGG	Bomo_Chr1	6922606	6922629
Bm_sgRNA_26036	CAAGCCCCCCGATTGGTTCC	KWMTBOMO00216_exon_4	CAAGCCCCCCGATTGGTTCCTGG	Bomo_Chr1	6922716	6922739
Bm_sgRNA_54147	GCCTGGTAGAGCGGTTCTTC	KWMTBOMO00216_exon_4	GCCTGGTAGAGCGGTTCTTCGGG	Bomo_Chr1	6922664	6922687
Bm_sgRNA_62936	GTAGAGCGGTTCTTCGGGGT	KWMTBOMO00216_exon_4	GTAGAGCGGTTCTTCGGGGTCGG	Bomo_Chr1	6922669	6922692
Bm_sgRNA_07377	AATTTGGTGAAATTGCTAGG	KWMTBOMO00217_exon_2	AATTTGGTGAAATTGCTAGGAGG	Bomo_Chr1	6983152	6983175
Bm_sgRNA_21897	ATGCATTGGGCCTGTAAGCG	KWMTBOMO00217_exon_2	ATGCATTGGGCCTGTAAGCGAGG	Bomo_Chr1	6983182	6983205
Bm_sgRNA_16291	AGGCGACGTTTCCGGGTCAG	KWMTBOMO00217_promoter	AGGCGACGTTTCCGGGTCAGCGG	Bomo_Chr1	6984731	6984754
Bm_sgRNA_41204	CTCATTAAGGCGACGTTTCC	KWMTBOMO00217_promoter	CTCATTAAGGCGACGTTTCCGGG	Bomo_Chr1	6984724	6984747
Bm_sgRNA_49696	GAGGGTTTAAACACAAACGT	KWMTBOMO00217_promoter	GAGGGTTTAAACACAAACGTCGG	Bomo_Chr1	6984656	6984679
Bm_sgRNA_27191	CACCGAGTTAGTCGACAGGG	KWMTBOMO00218_exon_1	CACCGAGTTAGTCGACAGGGAGG	KWMTBOMO00218_exon_1	717	740
Bm_sgRNA_35693	CGACTAACTCGGTGTGTTCG	KWMTBOMO00218_exon_1	CGACTAACTCGGTGTGTTCGGGG	KWMTBOMO00218_exon_1	708	731
Bm_sgRNA_49536	GAGGATTGGCGGAGCGGCGT	KWMTBOMO00218_exon_1	GAGGATTGGCGGAGCGGCGTCGG	KWMTBOMO00218_exon_1	200	223
Bm_sgRNA_56264	GCTGCGCCATTTTGAGAAGG	KWMTBOMO00218_exon_1	GCTGCGCCATTTTGAGAAGGCGG	KWMTBOMO00218_exon_1	2106	2129
Bm_sgRNA_65057	GTGATCGGTAATGATGTTTA	KWMTBOMO00218_exon_1	GTGATCGGTAATGATGTTTATGG	KWMTBOMO00218_exon_1	269	292
Bm_sgRNA_05399	AAGTTTATGTTAGCACACAA	KWMTBOMO00219_exon_1	AAGTTTATGTTAGCACACAATGG	Bomo_Chr1	7020867	7020890
Bm_sgRNA_73069	TATTTCATCGAAACTTAACT	KWMTBOMO00219_exon_1	TATTTCATCGAAACTTAACTCGG	Bomo_Chr1	7020893	7020916
Bm_sgRNA_74708	TCATCGAAACTTAACTCGGT	KWMTBOMO00219_exon_1	TCATCGAAACTTAACTCGGTTGG	Bomo_Chr1	7020897	7020920
Bm_sgRNA_79255	TGAAATGCTTCACTAATTCG	KWMTBOMO00219_exon_1	TGAAATGCTTCACTAATTCGTGG	Bomo_Chr1	7020832	7020855
Bm_sgRNA_20054	ATCAAGAAGTGAGAGCATGC	KWMTBOMO00219_exon_2	ATCAAGAAGTGAGAGCATGCTGG	Bomo_Chr1	7020243	7020266
Bm_sgRNA_65956	GTGTCAAGAGATCCCACGTG	KWMTBOMO00219_exon_2	GTGTCAAGAGATCCCACGTGTGG	Bomo_Chr1	7020566	7020589
Bm_sgRNA_05394	AAGTTTAGGCAATTGAAATT	KWMTBOMO00219_promoter	AAGTTTAGGCAATTGAAATTTGG	Bomo_Chr1	7020987	7021010
Bm_sgRNA_46280	GAACTTACTTATTTATGGAA	KWMTBOMO00219_promoter	GAACTTACTTATTTATGGAACGG	Bomo_Chr1	7021100	7021123
Bm_sgRNA_32499	CCCCTACGACCCGACGCTGG	KWMTBOMO00220_exon_3	CCCCTACGACCCGACGCTGGCGG	Bomo_Chr1	7145611	7145634
Bm_sgRNA_33333	CCGCTCTCCTTCAGCGCGTA	KWMTBOMO00220_exon_3	CCGCTCTCCTTCAGCGCGTAAGG	Bomo_Chr1	7145534	7145557
Bm_sgRNA_47905	GACCCGACGCTGGCGGCCTA	KWMTBOMO00220_exon_3	GACCCGACGCTGGCGGCCTACGG	Bomo_Chr1	7145618	7145641
Bm_sgRNA_53777	GCCGCCAGCGTCGGGTCGTA	KWMTBOMO00220_exon_3	GCCGCCAGCGTCGGGTCGTAGGG	Bomo_Chr1	7145612	7145635
Bm_sgRNA_57987	GGAGATGTCTGCGTGGACGT	KWMTBOMO00220_exon_3	GGAGATGTCTGCGTGGACGTCGG	Bomo_Chr1	7145560	7145583
Bm_sgRNA_76864	TCGGCAGGCTTGCAGCCCTC	KWMTBOMO00220_exon_3	TCGGCAGGCTTGCAGCCCTCCGG	Bomo_Chr1	7145579	7145602
Bm_sgRNA_35704	CGACTAGCACGCTCAAAGCA	KWMTBOMO00221_exon_4	CGACTAGCACGCTCAAAGCATGG	Bomo_Chr1	7325350	7325373
Bm_sgRNA_37511	CGCTTACGCAAGTTTCTACT	KWMTBOMO00221_exon_4	CGCTTACGCAAGTTTCTACTTGG	Bomo_Chr1	7325446	7325469
Bm_sgRNA_45088	CTTTGCCGTCATTACTTTTG	KWMTBOMO00221_exon_4	CTTTGCCGTCATTACTTTTGTGG	Bomo_Chr1	7325567	7325590
Bm_sgRNA_50850	GATGACCACAAAAGTAATGA	KWMTBOMO00221_exon_4	GATGACCACAAAAGTAATGACGG	Bomo_Chr1	7325562	7325585
Bm_sgRNA_88425	TTCTCCCCTTTCGTTGGATA	KWMTBOMO00221_exon_4	TTCTCCCCTTTCGTTGGATAAGG	Bomo_Chr1	7325394	7325417
Bm_sgRNA_21509	ATGAAGGCACATCTAGTGCG	KWMTBOMO00223_exon_1	ATGAAGGCACATCTAGTGCGCGG	Bomo_Chr1	7392339	7392362
Bm_sgRNA_48793	GAGAATTTGGTGGCATTGGG	KWMTBOMO00223_exon_1	GAGAATTTGGTGGCATTGGGGGG	Bomo_Chr1	7392172	7392195
Bm_sgRNA_60894	GGTAAATTTGGGCCTTTGGT	KWMTBOMO00223_exon_1	GGTAAATTTGGGCCTTTGGTAGG	Bomo_Chr1	7392370	7392393
Bm_sgRNA_66815	GTTCGGTAAATTTGGGCCTT	KWMTBOMO00223_exon_1	GTTCGGTAAATTTGGGCCTTTGG	Bomo_Chr1	7392374	7392397
Bm_sgRNA_74645	TCATCAATTGCCCCTACCAA	KWMTBOMO00223_exon_1	TCATCAATTGCCCCTACCAAAGG	Bomo_Chr1	7392358	7392381
Bm_sgRNA_89142	TTGATGGTATGCAACCACAT	KWMTBOMO00223_exon_1	TTGATGGTATGCAACCACATCGG	Bomo_Chr1	7392291	7392314
Bm_sgRNA_42510	CTGATTATAGAAGTGAAGTG	KWMTBOMO00223_promoter	CTGATTATAGAAGTGAAGTGGGG	Bomo_Chr1	7392530	7392553
Bm_sgRNA_79619	TGAATGATGAATCTTGGGAT	KWMTBOMO00223_promoter	TGAATGATGAATCTTGGGATTGG	Bomo_Chr1	7392559	7392582
Bm_sgRNA_82086	TGCTGATTATAGAAGTGAAG	KWMTBOMO00223_promoter	TGCTGATTATAGAAGTGAAGTGG	Bomo_Chr1	7392532	7392555
Bm_sgRNA_11518	ACTATTATGCAAACAAGCAC	KWMTBOMO00224_exon_2	ACTATTATGCAAACAAGCACTGG	Bomo_Chr1	7403574	7403597
Bm_sgRNA_25457	CAACAAATGACAAGCAAACA	KWMTBOMO00224_exon_3	CAACAAATGACAAGCAAACACGG	Bomo_Chr1	7407445	7407468
Bm_sgRNA_29201	CAGTGGTCCACTCAGGTTCT	KWMTBOMO00224_exon_3	CAGTGGTCCACTCAGGTTCTCGG	Bomo_Chr1	7407502	7407525
Bm_sgRNA_30884	CCAAAAAATGGATACCATAT	KWMTBOMO00224_exon_3	CCAAAAAATGGATACCATATCGG	Bomo_Chr1	7407406	7407429
Bm_sgRNA_64223	GTCGCAGTGGAAAGCGTTAC	KWMTBOMO00224_exon_3	GTCGCAGTGGAAAGCGTTACTGG	Bomo_Chr1	7407468	7407491
Bm_sgRNA_66818	GTTCGGTCGACCGTCGAACT	KWMTBOMO00224_exon_3	GTTCGGTCGACCGTCGAACTCGG	Bomo_Chr1	7407596	7407619
Bm_sgRNA_87845	TTCGAAACAGTGGTCCACTC	KWMTBOMO00224_exon_3	TTCGAAACAGTGGTCCACTCAGG	Bomo_Chr1	7407495	7407518
Bm_sgRNA_88442	TTCTCGGAATCCGAGTTCGA	KWMTBOMO00224_exon_3	TTCTCGGAATCCGAGTTCGACGG	Bomo_Chr1	7407586	7407609
Bm_sgRNA_09548	ACCCCCAACGGGCACTTCAG	KWMTBOMO00225_exon_2	ACCCCCAACGGGCACTTCAGAGG	KWMTBOMO00225_exon_2	2086	2109
Bm_sgRNA_09623	ACCCGTGTCCCAGATATCGA	KWMTBOMO00225_exon_2	ACCCGTGTCCCAGATATCGAGGG	KWMTBOMO00225_exon_2	2420	2443
Bm_sgRNA_10936	ACGGGGGATGCGCGATATAT	KWMTBOMO00225_exon_2	ACGGGGGATGCGCGATATATCGG	KWMTBOMO00225_exon_2	917	940
Bm_sgRNA_15174	AGCCTTCTCTTTCGCGCTGT	KWMTBOMO00225_exon_2	AGCCTTCTCTTTCGCGCTGTGGG	KWMTBOMO00225_exon_2	1750	1773
Bm_sgRNA_16695	AGGTCCCACAGCAGTGATGC	KWMTBOMO00225_exon_2	AGGTCCCACAGCAGTGATGCAGG	KWMTBOMO00225_exon_2	2639	2662
Bm_sgRNA_27685	CACTAGCTGGGAGAAGCCGT	KWMTBOMO00225_exon_2	CACTAGCTGGGAGAAGCCGTAGG	KWMTBOMO00225_exon_2	2452	2475
Bm_sgRNA_30809	CATTTGACTCCATACAGAGG	KWMTBOMO00225_exon_2	CATTTGACTCCATACAGAGGAGG	KWMTBOMO00225_exon_2	463	486
Bm_sgRNA_31937	CCATACAGAGGAGGGCCGTT	KWMTBOMO00225_exon_2	CCATACAGAGGAGGGCCGTTCGG	KWMTBOMO00225_exon_2	454	477
Bm_sgRNA_42302	CTGAAGTGGAGAACTCTCTG	KWMTBOMO00225_exon_2	CTGAAGTGGAGAACTCTCTGGGG	KWMTBOMO00225_exon_2	841	864
Bm_sgRNA_44680	CTTGGCAATTACCTTCTTGT	KWMTBOMO00225_exon_2	CTTGGCAATTACCTTCTTGTAGG	KWMTBOMO00225_exon_2	1921	1944
Bm_sgRNA_49345	GAGCTCATTCCATAGCCGGA	KWMTBOMO00225_exon_2	GAGCTCATTCCATAGCCGGATGG	KWMTBOMO00225_exon_2	190	213
Bm_sgRNA_49874	GAGTCCTCAACAGAGCGAAG	KWMTBOMO00225_exon_2	GAGTCCTCAACAGAGCGAAGCGG	KWMTBOMO00225_exon_2	592	615
Bm_sgRNA_50241	GATACTCTCGGAAGGTTGCA	KWMTBOMO00225_exon_2	GATACTCTCGGAAGGTTGCAGGG	KWMTBOMO00225_exon_2	700	723
Bm_sgRNA_63065	GTAGGCCAAGGCGAAATCGT	KWMTBOMO00225_exon_2	GTAGGCCAAGGCGAAATCGTAGG	KWMTBOMO00225_exon_2	2470	2493
Bm_sgRNA_76872	TCGGCCATCAGAGTCTCTCT	KWMTBOMO00225_exon_2	TCGGCCATCAGAGTCTCTCTCGG	KWMTBOMO00225_exon_2	898	921
Bm_sgRNA_81960	TGCTATGCAGATGATAGCAC	KWMTBOMO00225_exon_2	TGCTATGCAGATGATAGCACGGG	KWMTBOMO00225_exon_2	935	958
Bm_sgRNA_82081	TGCTGATCCTGACGTCTGTG	KWMTBOMO00225_exon_2	TGCTGATCCTGACGTCTGTGCGG	KWMTBOMO00225_exon_2	2157	2180
Bm_sgRNA_83193	TGGGCGGTCTTCCATGAAGA	KWMTBOMO00225_exon_2	TGGGCGGTCTTCCATGAAGACGG	KWMTBOMO00225_exon_2	1466	1489
Bm_sgRNA_91838	TTTGGATGGGCGGAGCATCA	KWMTBOMO00225_exon_2	TTTGGATGGGCGGAGCATCACGG	KWMTBOMO00225_exon_2	1083	1106
Bm_sgRNA_03332	AACGCTCAGGGAATCCAGAA	KWMTBOMO00226_exon_1	AACGCTCAGGGAATCCAGAATGG	Bomo_Chr1	7485052	7485075
Bm_sgRNA_04135	AAGAGAGTTCGACCAAACTA	KWMTBOMO00226_exon_1	AAGAGAGTTCGACCAAACTACGG	Bomo_Chr1	7485084	7485107
Bm_sgRNA_44810	CTTGTCGTAGCTAACGCTCA	KWMTBOMO00226_exon_1	CTTGTCGTAGCTAACGCTCAGGG	Bomo_Chr1	7485064	7485087
Bm_sgRNA_67801	GTTTGGCGATGTCAATATCT	KWMTBOMO00226_exon_1	GTTTGGCGATGTCAATATCTCGG	Bomo_Chr1	7485029	7485052
Bm_sgRNA_70269	TACGTATCCTTGAATTTTAG	KWMTBOMO00226_exon_1	TACGTATCCTTGAATTTTAGGGG	Bomo_Chr1	7484988	7485011
Bm_sgRNA_75529	TCCCGTTCCCCTAAAATTCA	KWMTBOMO00226_exon_1	TCCCGTTCCCCTAAAATTCAAGG	Bomo_Chr1	7484995	7485018
Bm_sgRNA_78959	TCTTGTCGTAGCTAACGCTC	KWMTBOMO00226_exon_1	TCTTGTCGTAGCTAACGCTCAGG	Bomo_Chr1	7485065	7485088
Bm_sgRNA_84113	TGTCAATATCTCGGCCATTC	KWMTBOMO00226_exon_1	TGTCAATATCTCGGCCATTCTGG	Bomo_Chr1	7485038	7485061
Bm_sgRNA_52879	GCATAGCATAGATGCAATAT	KWMTBOMO00226_promoter	GCATAGCATAGATGCAATATTGG	Bomo_Chr1	7484887	7484910
Bm_sgRNA_02412	AAATTCTTCAAACTCGCTAT	KWMTBOMO00227_exon_1	AAATTCTTCAAACTCGCTATCGG	Bomo_Chr1	7521849	7521872
Bm_sgRNA_67317	GTTGGGGCCTTAATGTGTTG	KWMTBOMO00227_exon_1	GTTGGGGCCTTAATGTGTTGCGG	Bomo_Chr1	7521805	7521828
Bm_sgRNA_26992	CACATCCTCTGTCTTCTTCG	KWMTBOMO00227_exon_2	CACATCCTCTGTCTTCTTCGGGG	Bomo_Chr1	7521529	7521552
Bm_sgRNA_40323	CTACCTTCACTTTTCGAGGA	KWMTBOMO00227_exon_2	CTACCTTCACTTTTCGAGGAAGG	Bomo_Chr1	7521552	7521575
Bm_sgRNA_65932	GTGTAGGCGAAACCGATGGT	KWMTBOMO00227_exon_2	GTGTAGGCGAAACCGATGGTCGG	Bomo_Chr1	7521509	7521532
Bm_sgRNA_91959	TTTGTAAACGTCTGGTGACG	KWMTBOMO00227_exon_2	TTTGTAAACGTCTGGTGACGAGG	Bomo_Chr1	7521420	7521443
Bm_sgRNA_07473	ACAAAAGCACGCTTGCGCTC	KWMTBOMO00227_promoter	ACAAAAGCACGCTTGCGCTCTGG	Bomo_Chr1	7522015	7522038
Bm_sgRNA_09244	ACCAAGTTGGCGGACTAGTT	KWMTBOMO00228_exon_1	ACCAAGTTGGCGGACTAGTTCGG	Bomo_Chr1	7529235	7529258
Bm_sgRNA_26247	CAAGTCTTGGAAAACGGATA	KWMTBOMO00228_exon_1	CAAGTCTTGGAAAACGGATAAGG	Bomo_Chr1	7529259	7529282
Bm_sgRNA_46184	GAACGTTAATACCCAAGTCT	KWMTBOMO00228_exon_1	GAACGTTAATACCCAAGTCTTGG	Bomo_Chr1	7529272	7529295
Bm_sgRNA_46685	GAAGCTCTCCGAGCTTAGGA	KWMTBOMO00228_exon_1	GAAGCTCTCCGAGCTTAGGATGG	Bomo_Chr1	7529149	7529172
Bm_sgRNA_56720	GCTTCATGCAGCAAGAGTCC	KWMTBOMO00228_exon_1	GCTTCATGCAGCAAGAGTCCAGG	Bomo_Chr1	7529167	7529190
Bm_sgRNA_66796	GTTCGCTTTCTGCTTGAGCC	KWMTBOMO00228_exon_1	GTTCGCTTTCTGCTTGAGCCTGG	Bomo_Chr1	7529185	7529208
Bm_sgRNA_60527	GGGGCAAATACTTAGTTCAA	KWMTBOMO00228_promoter	GGGGCAAATACTTAGTTCAAGGG	Bomo_Chr1	7528939	7528962
Bm_sgRNA_63998	GTCCGCTTTATAAAGAGAAG	KWMTBOMO00228_promoter	GTCCGCTTTATAAAGAGAAGAGG	Bomo_Chr1	7528868	7528891
Bm_sgRNA_08477	ACAGCCGTTTGAGAATTCGG	KWMTBOMO00229_exon_1	ACAGCCGTTTGAGAATTCGGAGG	Bomo_Chr1	7546819	7546842
Bm_sgRNA_26048	CAAGCCTCCGAATTCTCAAA	KWMTBOMO00229_exon_1	CAAGCCTCCGAATTCTCAAACGG	Bomo_Chr1	7546815	7546838
Bm_sgRNA_38526	CGGTGGAGCGATATTGATGA	KWMTBOMO00229_exon_1	CGGTGGAGCGATATTGATGACGG	Bomo_Chr1	7546780	7546803
Bm_sgRNA_49613	GAGGCTTGAGCTGTAAGACG	KWMTBOMO00229_exon_1	GAGGCTTGAGCTGTAAGACGCGG	Bomo_Chr1	7546800	7546823
Bm_sgRNA_56823	GCTTGAGCTGTAAGACGCGG	KWMTBOMO00229_exon_1	GCTTGAGCTGTAAGACGCGGTGG	Bomo_Chr1	7546797	7546820
Bm_sgRNA_77749	TCTCAAACGGCTGTGTCACC	KWMTBOMO00229_exon_1	TCTCAAACGGCTGTGTCACCTGG	Bomo_Chr1	7546828	7546851
Bm_sgRNA_29995	CATCGTTGTTCGGGGGACAT	KWMTBOMO00229_promoter	CATCGTTGTTCGGGGGACATTGG	Bomo_Chr1	7546625	7546648
Bm_sgRNA_90260	TTGTTCGGGGGACATTGGTG	KWMTBOMO00229_promoter	TTGTTCGGGGGACATTGGTGAGG	Bomo_Chr1	7546630	7546653
Bm_sgRNA_67802	GTTTGGCGATGTTAATATAT	KWMTBOMO00230_exon_2	GTTTGGCGATGTTAATATATCGG	Bomo_Chr1	7582111	7582134
Bm_sgRNA_84940	TGTTAATATATCGGCCATTT	KWMTBOMO00230_exon_2	TGTTAATATATCGGCCATTTTGG	Bomo_Chr1	7582102	7582125
Bm_sgRNA_39610	CGTTACTTGTCGTAGCTATA	KWMTBOMO00230_exon_4	CGTTACTTGTCGTAGCTATATGG	Bomo_Chr1	7578782	7578805
Bm_sgRNA_45301	CTTTTTTTGTACGCCAATCG	KWMTBOMO00230_exon_4	CTTTTTTTGTACGCCAATCGCGG	Bomo_Chr1	7578898	7578921
Bm_sgRNA_90713	TTTATACGTATACATTACTC	KWMTBOMO00230_exon_4	TTTATACGTATACATTACTCTGG	Bomo_Chr1	7578757	7578780
Bm_sgRNA_91977	TTTGTACGCCAATCGCGGAT	KWMTBOMO00230_exon_4	TTTGTACGCCAATCGCGGATCGG	Bomo_Chr1	7578903	7578926
Bm_sgRNA_03234	AACGAGGGGCCCAACTCTGT	KWMTBOMO00230_exon_6	AACGAGGGGCCCAACTCTGTGGG	Bomo_Chr1	7576938	7576961
Bm_sgRNA_60113	GGGAGATCTCCATAGCTCGT	KWMTBOMO00230_exon_6	GGGAGATCTCCATAGCTCGTTGG	Bomo_Chr1	7576867	7576890
Bm_sgRNA_41593	CTCGAGCCGGAGTGGCGTTA	KWMTBOMO00230_exon_7	CTCGAGCCGGAGTGGCGTTACGG	Bomo_Chr1	7576226	7576249
Bm_sgRNA_09201	ACCAAAATATAACCGGTCGA	KWMTBOMO00231_exon_2	ACCAAAATATAACCGGTCGAAGG	Bomo_Chr1	7697307	7697330
Bm_sgRNA_10141	ACCTTCGACCGGTTATATTT	KWMTBOMO00231_exon_2	ACCTTCGACCGGTTATATTTTGG	Bomo_Chr1	7697306	7697329
Bm_sgRNA_21834	ATGCACAACCAAAATATAAC	KWMTBOMO00231_exon_2	ATGCACAACCAAAATATAACCGG	Bomo_Chr1	7697314	7697337
Bm_sgRNA_66758	GTTCGAGCTGCAAGCATATG	KWMTBOMO00231_exon_2	GTTCGAGCTGCAAGCATATGTGG	Bomo_Chr1	7697285	7697308
Bm_sgRNA_76694	TCGCGTACTTGAATACATTC	KWMTBOMO00231_exon_2	TCGCGTACTTGAATACATTCTGG	Bomo_Chr1	7697342	7697365
Bm_sgRNA_77216	TCGTGAAAGCTTGAATGCAT	KWMTBOMO00231_exon_2	TCGTGAAAGCTTGAATGCATCGG	Bomo_Chr1	7697247	7697270
Bm_sgRNA_78439	TCTGGATCTCTTCAGTGTTC	KWMTBOMO00231_exon_2	TCTGGATCTCTTCAGTGTTCTGG	Bomo_Chr1	7697360	7697383
Bm_sgRNA_89254	TTGCAGCTCGAACCTTCGAC	KWMTBOMO00231_exon_2	TTGCAGCTCGAACCTTCGACCGG	Bomo_Chr1	7697295	7697318
Bm_sgRNA_03299	AACGCCGCGAGTCGGCCTGA	KWMTBOMO00232_exon_1	AACGCCGCGAGTCGGCCTGAGGG	KWMTBOMO00232_exon_1	1838	1861
Bm_sgRNA_04801	AAGGAGTTCCCTAATATCGT	KWMTBOMO00232_exon_1	AAGGAGTTCCCTAATATCGTCGG	KWMTBOMO00232_exon_1	2086	2109
Bm_sgRNA_05462	AATAAAGCTAAATGGGTCGG	KWMTBOMO00232_exon_1	AATAAAGCTAAATGGGTCGGCGG	KWMTBOMO00232_exon_1	977	1000
Bm_sgRNA_08864	ACATCACCTCGACATTAGAT	KWMTBOMO00232_exon_1	ACATCACCTCGACATTAGATAGG	KWMTBOMO00232_exon_1	2158	2181
Bm_sgRNA_12066	ACTGCGGTGCTATTTCAGAG	KWMTBOMO00232_exon_1	ACTGCGGTGCTATTTCAGAGGGG	KWMTBOMO00232_exon_1	824	847
Bm_sgRNA_13800	AGAGACTTCGTCTCATCCAA	KWMTBOMO00232_exon_1	AGAGACTTCGTCTCATCCAAGGG	KWMTBOMO00232_exon_1	1367	1390
Bm_sgRNA_23673	ATTCTTATCGATGAACAATT	KWMTBOMO00232_exon_1	ATTCTTATCGATGAACAATTCGG	KWMTBOMO00232_exon_1	1343	1366
Bm_sgRNA_24681	ATTTTCAAACTATTCAACAT	KWMTBOMO00232_exon_1	ATTTTCAAACTATTCAACATGGG	KWMTBOMO00232_exon_1	1172	1195
Bm_sgRNA_25567	CAACATCACGATGAGTTGGA	KWMTBOMO00232_exon_1	CAACATCACGATGAGTTGGACGG	KWMTBOMO00232_exon_1	1567	1590
Bm_sgRNA_35498	CGACCAAAACCGTTATACAC	KWMTBOMO00232_exon_1	CGACCAAAACCGTTATACACGGG	KWMTBOMO00232_exon_1	1250	1273
Bm_sgRNA_38438	CGGTAGTAAGACCTTTGGGA	KWMTBOMO00232_exon_1	CGGTAGTAAGACCTTTGGGAGGG	KWMTBOMO00232_exon_1	1916	1939
Bm_sgRNA_39006	CGTCCCGTCGTTATGAAGCT	KWMTBOMO00232_exon_1	CGTCCCGTCGTTATGAAGCTCGG	KWMTBOMO00232_exon_1	2339	2362
Bm_sgRNA_39667	CGTTCCCGTCACGAGGACTG	KWMTBOMO00232_exon_1	CGTTCCCGTCACGAGGACTGTGG	KWMTBOMO00232_exon_1	2301	2324
Bm_sgRNA_46023	GAACCACTGTCCTAGGGCTA	KWMTBOMO00232_exon_1	GAACCACTGTCCTAGGGCTAGGG	KWMTBOMO00232_exon_1	883	906
Bm_sgRNA_47283	GAATGTCATCGATGCATCCA	KWMTBOMO00232_exon_1	GAATGTCATCGATGCATCCAGGG	KWMTBOMO00232_exon_1	691	714
Bm_sgRNA_59802	GGCTCTTCTATAGTAAATGA	KWMTBOMO00232_exon_1	GGCTCTTCTATAGTAAATGACGG	KWMTBOMO00232_exon_1	2776	2799
Bm_sgRNA_60130	GGGAGCTCTGTCATTCTGGC	KWMTBOMO00232_exon_1	GGGAGCTCTGTCATTCTGGCGGG	KWMTBOMO00232_exon_1	2594	2617
Bm_sgRNA_60169	GGGATAGAGTCCGGGTTAAA	KWMTBOMO00232_exon_1	GGGATAGAGTCCGGGTTAAACGG	KWMTBOMO00232_exon_1	2225	2248
Bm_sgRNA_62383	GTAACTATGCCCCCCCTCGT	KWMTBOMO00232_exon_1	GTAACTATGCCCCCCCTCGTAGG	KWMTBOMO00232_exon_1	1862	1885
Bm_sgRNA_66038	GTGTGCCGAATCTCACTGAC	KWMTBOMO00232_exon_1	GTGTGCCGAATCTCACTGACGGG	KWMTBOMO00232_exon_1	2702	2725
Bm_sgRNA_68227	TAAACGGACGCGATAACGAT	KWMTBOMO00232_exon_1	TAAACGGACGCGATAACGATCGG	KWMTBOMO00232_exon_1	2672	2695
Bm_sgRNA_73968	TCACGGAGCACATTCTTGTG	KWMTBOMO00232_exon_1	TCACGGAGCACATTCTTGTGGGG	KWMTBOMO00232_exon_1	1279	1302
Bm_sgRNA_75177	TCCAGCTGTGAGAGGTCGTG	KWMTBOMO00232_exon_1	TCCAGCTGTGAGAGGTCGTGGGG	KWMTBOMO00232_exon_1	1066	1089
Bm_sgRNA_80169	TGAGAGGTCGTGGGGAGGAG	KWMTBOMO00232_exon_1	TGAGAGGTCGTGGGGAGGAGCGG	KWMTBOMO00232_exon_1	1074	1097
Bm_sgRNA_15619	AGCTCGGAGGCGGTTTTGGC	KWMTBOMO00232_promoter	AGCTCGGAGGCGGTTTTGGCGGG	Bomo_Chr1	7889771	7889794
Bm_sgRNA_19388	ATAGGATTTTTTAACGCTTA	KWMTBOMO00232_promoter	ATAGGATTTTTTAACGCTTACGG	Bomo_Chr1	7889352	7889375
Bm_sgRNA_24904	CAAAACCGCCTCCGAGCTTC	KWMTBOMO00232_promoter	CAAAACCGCCTCCGAGCTTCCGG	Bomo_Chr1	7889766	7889789
Bm_sgRNA_37749	CGGAGGGCAAGTCGCGGGGG	KWMTBOMO00232_promoter	CGGAGGGCAAGTCGCGGGGGCGG	Bomo_Chr1	7889603	7889626
Bm_sgRNA_54393	GCGAGATTGTCGGACGCGGT	KWMTBOMO00232_promoter	GCGAGATTGTCGGACGCGGTCGG	Bomo_Chr1	7889583	7889606
Bm_sgRNA_55105	GCGGTCGGAGGGCAAGTCGC	KWMTBOMO00232_promoter	GCGGTCGGAGGGCAAGTCGCGGG	Bomo_Chr1	7889598	7889621
Bm_sgRNA_58199	GGAGGGCAAGTCGCGGGGGC	KWMTBOMO00232_promoter	GGAGGGCAAGTCGCGGGGGCGGG	Bomo_Chr1	7889604	7889627
Bm_sgRNA_15619	AGCTCGGAGGCGGTTTTGGC	KWMTBOMO00233_exon_1	AGCTCGGAGGCGGTTTTGGCGGG	KWMTBOMO00233_exon_1	393	416
Bm_sgRNA_24904	CAAAACCGCCTCCGAGCTTC	KWMTBOMO00233_exon_1	CAAAACCGCCTCCGAGCTTCCGG	KWMTBOMO00233_exon_1	388	411
Bm_sgRNA_34215	CCTCGCCCCCGCCTCATCGA	KWMTBOMO00233_exon_1	CCTCGCCCCCGCCTCATCGACGG	KWMTBOMO00233_exon_1	1265	1288
Bm_sgRNA_36433	CGATTTATTTTAGGGGCTCG	KWMTBOMO00233_exon_1	CGATTTATTTTAGGGGCTCGGGG	KWMTBOMO00233_exon_1	424	447
Bm_sgRNA_37749	CGGAGGGCAAGTCGCGGGGG	KWMTBOMO00233_exon_1	CGGAGGGCAAGTCGCGGGGGCGG	KWMTBOMO00233_exon_1	225	248
Bm_sgRNA_42293	CTGAAGGATAACCGGGGGAG	KWMTBOMO00233_exon_1	CTGAAGGATAACCGGGGGAGGGG	KWMTBOMO00233_exon_1	1068	1091
Bm_sgRNA_45558	GAAACTCCGAGGCGAGCTGT	KWMTBOMO00233_exon_1	GAAACTCCGAGGCGAGCTGTGGG	KWMTBOMO00233_exon_1	1589	1612
Bm_sgRNA_46226	GAACTCCGCGTTGTAATACG	KWMTBOMO00233_exon_1	GAACTCCGCGTTGTAATACGCGG	KWMTBOMO00233_exon_1	859	882
Bm_sgRNA_48219	GACGCGGCGACGGAGTGGCA	KWMTBOMO00233_exon_1	GACGCGGCGACGGAGTGGCACGG	KWMTBOMO00233_exon_1	1115	1138
Bm_sgRNA_52260	GCACGGGCTGGGGGCGCAAC	KWMTBOMO00233_exon_1	GCACGGGCTGGGGGCGCAACGGG	KWMTBOMO00233_exon_1	1132	1155
Bm_sgRNA_54393	GCGAGATTGTCGGACGCGGT	KWMTBOMO00233_exon_1	GCGAGATTGTCGGACGCGGTCGG	KWMTBOMO00233_exon_1	205	228
Bm_sgRNA_55105	GCGGTCGGAGGGCAAGTCGC	KWMTBOMO00233_exon_1	GCGGTCGGAGGGCAAGTCGCGGG	KWMTBOMO00233_exon_1	220	243
Bm_sgRNA_55138	GCGGTTCCGTCGCGGTTTTT	KWMTBOMO00233_exon_1	GCGGTTCCGTCGCGGTTTTTTGG	KWMTBOMO00233_exon_1	500	523
Bm_sgRNA_58199	GGAGGGCAAGTCGCGGGGGC	KWMTBOMO00233_exon_1	GGAGGGCAAGTCGCGGGGGCGGG	KWMTBOMO00233_exon_1	226	249
Bm_sgRNA_58844	GGCAGGCACGACAGAGGCTG	KWMTBOMO00233_exon_1	GGCAGGCACGACAGAGGCTGCGG	KWMTBOMO00233_exon_1	1464	1487
Bm_sgRNA_63340	GTATGCACACCGGTCGCGGT	KWMTBOMO00233_exon_1	GTATGCACACCGGTCGCGGTAGG	KWMTBOMO00233_exon_1	759	782
Bm_sgRNA_19260	ATAGAGGCACCCGTCACGTG	KWMTBOMO00233_promoter	ATAGAGGCACCCGTCACGTGCGG	Bomo_Chr1	7891404	7891427
Bm_sgRNA_14343	AGATGCCGTTCGTGACCCCC	KWMTBOMO00234_exon_2	AGATGCCGTTCGTGACCCCCTGG	Bomo_Chr1	7904602	7904625
Bm_sgRNA_16552	AGGGGGTCACGAACGGCATC	KWMTBOMO00234_exon_2	AGGGGGTCACGAACGGCATCTGG	Bomo_Chr1	7904600	7904623
Bm_sgRNA_42546	CTGCAATCAATTCGGACGTG	KWMTBOMO00234_exon_2	CTGCAATCAATTCGGACGTGGGG	Bomo_Chr1	7904510	7904533
Bm_sgRNA_51033	GATGCTGGGTGCTGTAACTC	KWMTBOMO00234_exon_2	GATGCTGGGTGCTGTAACTCCGG	Bomo_Chr1	7904540	7904563
Bm_sgRNA_61230	GGTCACGAACGGCATCTGGA	KWMTBOMO00234_exon_2	GGTCACGAACGGCATCTGGAAGG	Bomo_Chr1	7904596	7904619
Bm_sgRNA_73710	TCAATTCGGACGTGGGGTAA	KWMTBOMO00234_exon_2	TCAATTCGGACGTGGGGTAATGG	Bomo_Chr1	7904516	7904539
Bm_sgRNA_00550	AAAATAACCACTGGGCTCCA	KWMTBOMO00235_exon_1	AAAATAACCACTGGGCTCCAAGG	Bomo_Chr1	8005047	8005070
Bm_sgRNA_02029	AAATCACTGCCACATCGTCA	KWMTBOMO00235_exon_1	AAATCACTGCCACATCGTCAAGG	Bomo_Chr1	8004898	8004921
Bm_sgRNA_43272	CTGGTTGGTAAAATAACCAC	KWMTBOMO00235_exon_1	CTGGTTGGTAAAATAACCACTGG	Bomo_Chr1	8005056	8005079
Bm_sgRNA_53694	GCCGAATCCTTGGAGCCCAG	KWMTBOMO00235_exon_1	GCCGAATCCTTGGAGCCCAGTGG	Bomo_Chr1	8005040	8005063
Bm_sgRNA_64400	GTCGTACGAAGCAATCGTGC	KWMTBOMO00235_exon_1	GTCGTACGAAGCAATCGTGCTGG	Bomo_Chr1	8004988	8005011
Bm_sgRNA_83199	TGGGCTCCAAGGATTCGGCA	KWMTBOMO00235_exon_1	TGGGCTCCAAGGATTCGGCAAGG	Bomo_Chr1	8005036	8005059
Bm_sgRNA_17837	AGTGTAATTTGTACAAGTGC	KWMTBOMO00235_promoter	AGTGTAATTTGTACAAGTGCAGG	Bomo_Chr1	8005248	8005271
Bm_sgRNA_19652	ATATCCTCAATATCCTGCGC	KWMTBOMO00235_promoter	ATATCCTCAATATCCTGCGCTGG	Bomo_Chr1	8005282	8005305
Bm_sgRNA_32602	CCCGCCAGCGCAGGATATTG	KWMTBOMO00235_promoter	CCCGCCAGCGCAGGATATTGAGG	Bomo_Chr1	8005278	8005301
Bm_sgRNA_04250	AAGATCAAACTTGAAATTTC	KWMTBOMO00236_exon_2	AAGATCAAACTTGAAATTTCAGG	Bomo_Chr1	8011384	8011407
Bm_sgRNA_13218	AGAAGTTGATGATACTCCCT	KWMTBOMO00236_exon_2	AGAAGTTGATGATACTCCCTGGG	Bomo_Chr1	8011241	8011264
Bm_sgRNA_30726	CATTGTTGATATATTTGGAG	KWMTBOMO00236_exon_2	CATTGTTGATATATTTGGAGGGG	Bomo_Chr1	8011044	8011067
Bm_sgRNA_50744	GATCTCTCATCTGAAGATGA	KWMTBOMO00236_exon_2	GATCTCTCATCTGAAGATGATGG	Bomo_Chr1	8011276	8011299
Bm_sgRNA_69180	TAATCAACTTAAATTGGAAG	KWMTBOMO00236_exon_2	TAATCAACTTAAATTGGAAGTGG	Bomo_Chr1	8011338	8011361
Bm_sgRNA_72243	TATCTTGATTGAGAGTGTGT	KWMTBOMO00236_exon_2	TATCTTGATTGAGAGTGTGTAGG	Bomo_Chr1	8011446	8011469
Bm_sgRNA_73390	TCAACAATGTTTGATGACTC	KWMTBOMO00236_exon_2	TCAACAATGTTTGATGACTCTGG	Bomo_Chr1	8011030	8011053
Bm_sgRNA_74275	TCAGCCTTACCCATTGAGTT	KWMTBOMO00236_exon_2	TCAGCCTTACCCATTGAGTTTGG	Bomo_Chr1	8011198	8011221
Bm_sgRNA_91700	TTTGCAGAGTAAGAAGACCC	KWMTBOMO00236_exon_2	TTTGCAGAGTAAGAAGACCCTGG	Bomo_Chr1	8011491	8011514
Bm_sgRNA_09186	ACATTTTCATTTCTACTCTC	KWMTBOMO00236_promoter	ACATTTTCATTTCTACTCTCAGG	Bomo_Chr1	8009879	8009902
Bm_sgRNA_21514	ATGAAGTCAGTAGTACTTAA	KWMTBOMO00236_promoter	ATGAAGTCAGTAGTACTTAAAGG	Bomo_Chr1	8010071	8010094
Bm_sgRNA_44045	CTTCATTACTGCTGAGCAAA	KWMTBOMO00236_promoter	CTTCATTACTGCTGAGCAAAGGG	Bomo_Chr1	8010054	8010077
Bm_sgRNA_12293	ACTGTCTTCTGATTTATCAG	KWMTBOMO00237_exon_2	ACTGTCTTCTGATTTATCAGGGG	Bomo_Chr1	8018049	8018072
Bm_sgRNA_27859	CACTGTCTTCTGATTTATCA	KWMTBOMO00237_exon_2	CACTGTCTTCTGATTTATCAGGG	Bomo_Chr1	8018050	8018073
Bm_sgRNA_49495	GAGGAGCATACGAGCAGTGA	KWMTBOMO00237_exon_2	GAGGAGCATACGAGCAGTGAAGG	Bomo_Chr1	8018020	8018043
Bm_sgRNA_51550	GATTTATCAGGGGTCACAGG	KWMTBOMO00237_exon_2	GATTTATCAGGGGTCACAGGAGG	Bomo_Chr1	8018039	8018062
Bm_sgRNA_74078	TCACTGTCTTCTGATTTATC	KWMTBOMO00237_exon_2	TCACTGTCTTCTGATTTATCAGG	Bomo_Chr1	8018051	8018074
Bm_sgRNA_78280	TCTGATTTATCAGGGGTCAC	KWMTBOMO00237_exon_2	TCTGATTTATCAGGGGTCACAGG	Bomo_Chr1	8018042	8018065
Bm_sgRNA_16890	AGTAACAAAGTACTTTGCTG	KWMTBOMO00238_exon_1	AGTAACAAAGTACTTTGCTGTGG	Bomo_Chr1	8035599	8035622
Bm_sgRNA_33178	CCGCAGGTAGGGCCTTAGCG	KWMTBOMO00238_exon_1	CCGCAGGTAGGGCCTTAGCGAGG	Bomo_Chr1	8035572	8035595
Bm_sgRNA_34221	CCTCGCTAAGGCCCTACCTG	KWMTBOMO00238_exon_1	CCTCGCTAAGGCCCTACCTGCGG	Bomo_Chr1	8035572	8035595
Bm_sgRNA_38299	CGGGCTCTTGGCCCTCGCTA	KWMTBOMO00238_exon_1	CGGGCTCTTGGCCCTCGCTAAGG	Bomo_Chr1	8035560	8035583
Bm_sgRNA_56568	GCTGTGGGTTACCGCAGGTA	KWMTBOMO00238_exon_1	GCTGTGGGTTACCGCAGGTAGGG	Bomo_Chr1	8035583	8035606
Bm_sgRNA_62345	GTAACAAAGTACTTTGCTGT	KWMTBOMO00238_exon_1	GTAACAAAGTACTTTGCTGTGGG	Bomo_Chr1	8035598	8035621
Bm_sgRNA_45636	GAAAGCCATGACATGGTCCA	KWMTBOMO00238_promoter	GAAAGCCATGACATGGTCCACGG	Bomo_Chr1	8035346	8035369
Bm_sgRNA_91554	TTTGACCTTCATGCGACAAA	KWMTBOMO00238_promoter	TTTGACCTTCATGCGACAAACGG	Bomo_Chr1	8035437	8035460
Bm_sgRNA_13569	AGACGCCGAAATAGCCGAGT	KWMTBOMO00239_exon_1	AGACGCCGAAATAGCCGAGTGGG	Bomo_Chr1	8056073	8056096
Bm_sgRNA_35061	CGAAATAGCCGAGTGGGAGA	KWMTBOMO00239_exon_1	CGAAATAGCCGAGTGGGAGAAGG	Bomo_Chr1	8056079	8056102
Bm_sgRNA_38094	CGGCGTCTACTTCTTTGTCA	KWMTBOMO00239_exon_1	CGGCGTCTACTTCTTTGTCAAGG	Bomo_Chr1	8056058	8056081
Bm_sgRNA_65569	GTGGAGCATCCGCAGGCAAG	KWMTBOMO00239_exon_1	GTGGAGCATCCGCAGGCAAGGGG	Bomo_Chr1	8055772	8055795
Bm_sgRNA_82516	TGGAGCATCCGCAGGCAAGG	KWMTBOMO00239_exon_1	TGGAGCATCCGCAGGCAAGGGGG	Bomo_Chr1	8055773	8055796
Bm_sgRNA_84727	TGTGGAGCATCCGCAGGCAA	KWMTBOMO00239_exon_1	TGTGGAGCATCCGCAGGCAAGGG	Bomo_Chr1	8055771	8055794
Bm_sgRNA_19780	ATATGTAAATTGATTCATAT	KWMTBOMO00239_promoter	ATATGTAAATTGATTCATATAGG	Bomo_Chr1	8055487	8055510
Bm_sgRNA_77740	TCTATTTTGTACTTATAAGT	KWMTBOMO00239_promoter	TCTATTTTGTACTTATAAGTTGG	Bomo_Chr1	8055529	8055552
Bm_sgRNA_07851	ACAATCTCAACGCGGCTTGT	KWMTBOMO00240_exon_2	ACAATCTCAACGCGGCTTGTCGG	Bomo_Chr1	8192728	8192751
Bm_sgRNA_70854	TAGCAGCAACAATCTCAACG	KWMTBOMO00240_exon_2	TAGCAGCAACAATCTCAACGCGG	Bomo_Chr1	8192736	8192759
Bm_sgRNA_73442	TCAACGCGGCTTGTCGGTCG	KWMTBOMO00240_exon_2	TCAACGCGGCTTGTCGGTCGAGG	Bomo_Chr1	8192722	8192745
Bm_sgRNA_35274	CGAAGTAAAAGAAATCCAGA	KWMTBOMO00243_exon_1	CGAAGTAAAAGAAATCCAGATGG	Bomo_Chr1	8281814	8281837
Bm_sgRNA_44885	CTTTAAGCAAAAACAATTGG	KWMTBOMO00243_exon_1	CTTTAAGCAAAAACAATTGGGGG	Bomo_Chr1	8281781	8281804
Bm_sgRNA_69230	TAATCGGTCACGTTTTATAG	KWMTBOMO00243_exon_1	TAATCGGTCACGTTTTATAGCGG	Bomo_Chr1	8281843	8281866
Bm_sgRNA_78791	TCTTCGTCATCACATCTAAT	KWMTBOMO00243_exon_1	TCTTCGTCATCACATCTAATCGG	Bomo_Chr1	8281859	8281882
Bm_sgRNA_86596	TTATAGCGGCTATTTCCATC	KWMTBOMO00243_exon_1	TTATAGCGGCTATTTCCATCTGG	Bomo_Chr1	8281829	8281852
Bm_sgRNA_22971	ATTAATTAGAGCCAAAACCC	KWMTBOMO00243_exon_2	ATTAATTAGAGCCAAAACCCTGG	Bomo_Chr1	8282537	8282560
Bm_sgRNA_50024	GAGTTCTTTCTTCTTCAGCC	KWMTBOMO00243_exon_2	GAGTTCTTTCTTCTTCAGCCAGG	Bomo_Chr1	8282555	8282578
Bm_sgRNA_83007	TGGCTGAAGAAGAAAGAACT	KWMTBOMO00243_exon_2	TGGCTGAAGAAGAAAGAACTCGG	Bomo_Chr1	8282557	8282580
Bm_sgRNA_07973	ACACACCACTGGGATCTGAA	KWMTBOMO00244_exon_1	ACACACCACTGGGATCTGAAGGG	Bomo_Chr1	8307316	8307339
Bm_sgRNA_35111	CGAACATTTCGCGGTTCTTC	KWMTBOMO00244_exon_1	CGAACATTTCGCGGTTCTTCTGG	Bomo_Chr1	8307252	8307275
Bm_sgRNA_46007	GAACATTTCGCGGTTCTTCT	KWMTBOMO00244_exon_1	GAACATTTCGCGGTTCTTCTGGG	Bomo_Chr1	8307253	8307276
Bm_sgRNA_49425	GAGCTTTTGGTCTCGACCAC	KWMTBOMO00244_exon_1	GAGCTTTTGGTCTCGACCACGGG	Bomo_Chr1	8307385	8307408
Bm_sgRNA_50249	GATACTGTAGGATTTCTTGA	KWMTBOMO00244_exon_1	GATACTGTAGGATTTCTTGATGG	Bomo_Chr1	8307229	8307252
Bm_sgRNA_78888	TCTTGATGGCGAACATTTCG	KWMTBOMO00244_exon_1	TCTTGATGGCGAACATTTCGCGG	Bomo_Chr1	8307243	8307266
Bm_sgRNA_88655	TTCTTCTAAGGACACACCAC	KWMTBOMO00244_exon_1	TTCTTCTAAGGACACACCACTGG	Bomo_Chr1	8307305	8307328
Bm_sgRNA_32364	CCCATCTCGCCGTCGTTCCT	KWMTBOMO00244_exon_2	CCCATCTCGCCGTCGTTCCTTGG	Bomo_Chr1	8303211	8303234
Bm_sgRNA_79926	TGACGCCCGCTTCGAAACAC	KWMTBOMO00244_exon_2	TGACGCCCGCTTCGAAACACTGG	Bomo_Chr1	8303184	8303207
Bm_sgRNA_46432	GAAGACCAGCAGCCGGTCGC	KWMTBOMO00244_exon_5	GAAGACCAGCAGCCGGTCGCAGG	Bomo_Chr1	8301709	8301732
Bm_sgRNA_48169	GACGCAAGGATCTAATTAGC	KWMTBOMO00244_exon_5	GACGCAAGGATCTAATTAGCTGG	Bomo_Chr1	8302159	8302182
Bm_sgRNA_04539	AAGCGCAACCGTATAATATG	KWMTBOMO00245_exon_1	AAGCGCAACCGTATAATATGCGG	Bomo_Chr1	8385860	8385883
Bm_sgRNA_09577	ACCCCTTGTTGCTGGTACGG	KWMTBOMO00245_exon_1	ACCCCTTGTTGCTGGTACGGCGG	Bomo_Chr1	8385808	8385831
Bm_sgRNA_24892	CAAAAATTGCACGCGTGCAC	KWMTBOMO00245_exon_1	CAAAAATTGCACGCGTGCACCGG	Bomo_Chr1	8385681	8385704
Bm_sgRNA_32530	CCCCTTGTTGCTGGTACGGC	KWMTBOMO00245_exon_1	CCCCTTGTTGCTGGTACGGCGGG	Bomo_Chr1	8385807	8385830
Bm_sgRNA_55746	GCTCATCACTTCCGCTGGGT	KWMTBOMO00245_exon_1	GCTCATCACTTCCGCTGGGTTGG	Bomo_Chr1	8385957	8385980
Bm_sgRNA_66989	GTTCTTTACAATAGGTGGGA	KWMTBOMO00245_exon_1	GTTCTTTACAATAGGTGGGATGG	Bomo_Chr1	8385711	8385734
Bm_sgRNA_69158	TAATATGCGGCAGAATTCGC	KWMTBOMO00245_exon_1	TAATATGCGGCAGAATTCGCCGG	Bomo_Chr1	8385873	8385896
Bm_sgRNA_83024	TGGCTGCTCATCACTTCCGC	KWMTBOMO00245_exon_1	TGGCTGCTCATCACTTCCGCTGG	Bomo_Chr1	8385962	8385985
Bm_sgRNA_67025	GTTGAAGATCGACTTTTATC	KWMTBOMO00245_promoter	GTTGAAGATCGACTTTTATCTGG	Bomo_Chr1	8385545	8385568
Bm_sgRNA_61525	GGTGAACTCCGGGTTGAAAT	KWMTBOMO00246_exon_3	GGTGAACTCCGGGTTGAAATCGG	Bomo_Chr1	8417629	8417652
Bm_sgRNA_64842	GTGAACTCCGGGTTGAAATC	KWMTBOMO00246_exon_3	GTGAACTCCGGGTTGAAATCGGG	Bomo_Chr1	8417628	8417651
Bm_sgRNA_70077	TACGAATCCCGATTTCAACC	KWMTBOMO00246_exon_3	TACGAATCCCGATTTCAACCCGG	Bomo_Chr1	8417621	8417644
Bm_sgRNA_89157	TTGATTACTACTACATATAG	KWMTBOMO00246_exon_3	TTGATTACTACTACATATAGAGG	Bomo_Chr1	8417682	8417705
Bm_sgRNA_11783	ACTCTAGGGATGCCGGGAAT	KWMTBOMO00247_exon_2	ACTCTAGGGATGCCGGGAATTGG	Bomo_Chr1	8434437	8434460
Bm_sgRNA_20766	ATCGAGCTACCATCGGGCTG	KWMTBOMO00247_exon_2	ATCGAGCTACCATCGGGCTGGGG	Bomo_Chr1	8434470	8434493
Bm_sgRNA_31740	CCAGGAAGTCCCCAGCCCGA	KWMTBOMO00247_exon_2	CCAGGAAGTCCCCAGCCCGATGG	Bomo_Chr1	8434479	8434502
Bm_sgRNA_32016	CCATCGAGCTACCATCGGGC	KWMTBOMO00247_exon_2	CCATCGAGCTACCATCGGGCTGG	Bomo_Chr1	8434468	8434491
Bm_sgRNA_32024	CCATCGGGCTGGGGACTTCC	KWMTBOMO00247_exon_2	CCATCGGGCTGGGGACTTCCTGG	Bomo_Chr1	8434479	8434502
Bm_sgRNA_04438	AAGCCACTACAACCGAACGC	KWMTBOMO00248_exon_1	AAGCCACTACAACCGAACGCAGG	Bomo_Chr1	8464030	8464053
Bm_sgRNA_06727	AATGGTGTTTGTGTTAGCAA	KWMTBOMO00248_exon_1	AATGGTGTTTGTGTTAGCAAAGG	Bomo_Chr1	8463915	8463938
Bm_sgRNA_41365	CTCCCTGCGTTCGGTTGTAG	KWMTBOMO00248_exon_1	CTCCCTGCGTTCGGTTGTAGTGG	Bomo_Chr1	8464027	8464050
Bm_sgRNA_85422	TGTTTTGCTAATGGCAGTAA	KWMTBOMO00248_exon_1	TGTTTTGCTAATGGCAGTAACGG	Bomo_Chr1	8463949	8463972
Bm_sgRNA_89836	TTGGTACCGCTCCCTGCGTT	KWMTBOMO00248_exon_1	TTGGTACCGCTCCCTGCGTTCGG	Bomo_Chr1	8464018	8464041
Bm_sgRNA_92611	TTTTGTCATTGTTTTGCTAA	KWMTBOMO00248_exon_1	TTTTGTCATTGTTTTGCTAATGG	Bomo_Chr1	8463958	8463981
Bm_sgRNA_16049	AGGAGGTATATGCGTGCGCA	KWMTBOMO00248_exon_2	AGGAGGTATATGCGTGCGCACGG	Bomo_Chr1	8460585	8460608
Bm_sgRNA_16369	AGGCTACTCCAAGGTGCGCT	KWMTBOMO00248_exon_2	AGGCTACTCCAAGGTGCGCTTGG	Bomo_Chr1	8460510	8460533
Bm_sgRNA_16676	AGGTATATGCGTGCGCACGG	KWMTBOMO00248_exon_2	AGGTATATGCGTGCGCACGGAGG	Bomo_Chr1	8460582	8460605
Bm_sgRNA_06245	AATCGTGTTTGTGTTTGTAC	KWMTBOMO00249_exon_2	AATCGTGTTTGTGTTTGTACTGG	Bomo_Chr1	8480469	8480492
Bm_sgRNA_09705	ACCGAAGATGACTATGAAAT	KWMTBOMO00249_exon_2	ACCGAAGATGACTATGAAATAGG	Bomo_Chr1	8480434	8480457
Bm_sgRNA_15627	AGCTCGTTTGTCGATCGGTA	KWMTBOMO00249_exon_2	AGCTCGTTTGTCGATCGGTACGG	Bomo_Chr1	8480534	8480557
Bm_sgRNA_32724	CCCTATTTCATAGTCATCTT	KWMTBOMO00249_exon_2	CCCTATTTCATAGTCATCTTCGG	Bomo_Chr1	8480433	8480456
Bm_sgRNA_35219	CGAAGATGACTATGAAATAG	KWMTBOMO00249_exon_2	CGAAGATGACTATGAAATAGGGG	Bomo_Chr1	8480432	8480455
Bm_sgRNA_74761	TCATCTTCGGTATTTGACCA	KWMTBOMO00249_exon_2	TCATCTTCGGTATTTGACCAAGG	Bomo_Chr1	8480446	8480469
Bm_sgRNA_76410	TCGATCGGTACGGCTGCTGC	KWMTBOMO00249_exon_2	TCGATCGGTACGGCTGCTGCTGG	Bomo_Chr1	8480524	8480547
Bm_sgRNA_81088	TGCACTGTACACTACTGCTG	KWMTBOMO00249_exon_3	TGCACTGTACACTACTGCTGTGG	Bomo_Chr1	8479710	8479733
Bm_sgRNA_00877	AAACAGACAAGCATTAGCTA	KWMTBOMO00250_exon_2	AAACAGACAAGCATTAGCTAAGG	Bomo_Chr1	8494370	8494393
Bm_sgRNA_02915	AACATGTTCTATGAAGTCTC	KWMTBOMO00250_exon_2	AACATGTTCTATGAAGTCTCTGG	Bomo_Chr1	8494291	8494314
Bm_sgRNA_11899	ACTGAATTGAGGACTCTGTC	KWMTBOMO00250_exon_2	ACTGAATTGAGGACTCTGTCAGG	Bomo_Chr1	8494329	8494352
Bm_sgRNA_14069	AGAGTCCTCAATTCAGTTCT	KWMTBOMO00250_exon_2	AGAGTCCTCAATTCAGTTCTTGG	Bomo_Chr1	8494335	8494358
Bm_sgRNA_42085	CTCTGTCAGGATTCGGGATA	KWMTBOMO00250_exon_2	CTCTGTCAGGATTCGGGATACGG	Bomo_Chr1	8494316	8494339
Bm_sgRNA_72623	TATGTGTAACTTTATGTCTC	KWMTBOMO00250_exon_2	TATGTGTAACTTTATGTCTCGGG	Bomo_Chr1	8494243	8494266
Bm_sgRNA_33998	CCTAGTTTTCGTTGTACAAT	KWMTBOMO00250_promoter	CCTAGTTTTCGTTGTACAATAGG	Bomo_Chr1	8493157	8493180
Bm_sgRNA_72171	TATCTATGTTAGATAATACA	KWMTBOMO00250_promoter	TATCTATGTTAGATAATACAAGG	Bomo_Chr1	8493186	8493209
Bm_sgRNA_01013	AAACCGGCGAACAATACCTA	KWMTBOMO00251_exon_1	AAACCGGCGAACAATACCTACGG	Bomo_Chr1	8508223	8508246
Bm_sgRNA_03100	AACCGGCGAACAATACCTAC	KWMTBOMO00251_exon_1	AACCGGCGAACAATACCTACGGG	Bomo_Chr1	8508224	8508247
Bm_sgRNA_10386	ACGAGGTGACCGACATGGCG	KWMTBOMO00251_exon_1	ACGAGGTGACCGACATGGCGAGG	Bomo_Chr1	8507758	8507781
Bm_sgRNA_12379	ACTTAAGGGCGAGCTCGTGG	KWMTBOMO00251_exon_1	ACTTAAGGGCGAGCTCGTGGTGG	Bomo_Chr1	8508030	8508053
Bm_sgRNA_29492	CATACTTAAGGGCGAGCTCG	KWMTBOMO00251_exon_1	CATACTTAAGGGCGAGCTCGTGG	Bomo_Chr1	8508027	8508050
Bm_sgRNA_43102	CTGGGACCGACCCATCATCA	KWMTBOMO00251_exon_1	CTGGGACCGACCCATCATCACGG	Bomo_Chr1	8507928	8507951
Bm_sgRNA_54386	GCGAGAATCCGGCGAACTAG	KWMTBOMO00251_exon_1	GCGAGAATCCGGCGAACTAGAGG	Bomo_Chr1	8507591	8507614
Bm_sgRNA_64218	GTCGCACGAGGTGACCGACA	KWMTBOMO00251_exon_1	GTCGCACGAGGTGACCGACATGG	Bomo_Chr1	8507763	8507786
Bm_sgRNA_78911	TCTTGCTGGACAATGCCCGT	KWMTBOMO00251_exon_1	TCTTGCTGGACAATGCCCGTAGG	Bomo_Chr1	8508239	8508262
Bm_sgRNA_15083	AGCCGGTGCCGCCTGTTACT	KWMTBOMO00252_exon_2	AGCCGGTGCCGCCTGTTACTAGG	Bomo_Chr1	8519076	8519099
Bm_sgRNA_20619	ATCCTAGTAACAGGCGGCAC	KWMTBOMO00252_exon_2	ATCCTAGTAACAGGCGGCACCGG	Bomo_Chr1	8519074	8519097
Bm_sgRNA_44041	CTTCATGGGAAAAGTTCTTG	KWMTBOMO00252_exon_2	CTTCATGGGAAAAGTTCTTGTGG	Bomo_Chr1	8519097	8519120
Bm_sgRNA_59647	GGCGTAGAAATCCCTCACAC	KWMTBOMO00252_exon_2	GGCGTAGAAATCCCTCACACTGG	Bomo_Chr1	8519042	8519065
Bm_sgRNA_84965	TGTTACTAGGATGTTTCTGC	KWMTBOMO00252_exon_2	TGTTACTAGGATGTTTCTGCCGG	Bomo_Chr1	8519063	8519086
Bm_sgRNA_86833	TTATTAACATCTTTTTACTT	KWMTBOMO00253_exon_1	TTATTAACATCTTTTTACTTCGG	Bomo_Chr1	8522002	8522025
Bm_sgRNA_88089	TTCGGATTACTACGATACTT	KWMTBOMO00253_exon_1	TTCGGATTACTACGATACTTAGG	Bomo_Chr1	8522020	8522043
Bm_sgRNA_19016	ATACGCACTATGCTCTGTGA	KWMTBOMO00253_exon_2	ATACGCACTATGCTCTGTGATGG	Bomo_Chr1	8522185	8522208
Bm_sgRNA_64318	GTCGGAGTTATGATTGGAGC	KWMTBOMO00253_exon_2	GTCGGAGTTATGATTGGAGCTGG	Bomo_Chr1	8522152	8522175
Bm_sgRNA_74633	TCATATTCGGAGCCGATGCC	KWMTBOMO00253_exon_2	TCATATTCGGAGCCGATGCCAGG	Bomo_Chr1	8522104	8522127
Bm_sgRNA_90005	TTGTCAACCCAACCTGGCAT	KWMTBOMO00253_exon_2	TTGTCAACCCAACCTGGCATCGG	Bomo_Chr1	8522116	8522139
Bm_sgRNA_11300	ACTAAGCACAAAGGGGGACC	KWMTBOMO00253_promoter	ACTAAGCACAAAGGGGGACCAGG	Bomo_Chr1	8521886	8521909
Bm_sgRNA_48305	GACGGGTGAAGAGGCTCACC	KWMTBOMO00253_promoter	GACGGGTGAAGAGGCTCACCTGG	Bomo_Chr1	8521904	8521927
Bm_sgRNA_73195	TATTTTGTAGACGGGTGAAG	KWMTBOMO00253_promoter	TATTTTGTAGACGGGTGAAGAGG	Bomo_Chr1	8521913	8521936
Bm_sgRNA_05779	AATAGTTAATAATCTAAAAA	KWMTBOMO00254_exon_2	AATAGTTAATAATCTAAAAAAGG	Bomo_Chr1	8532254	8532277
Bm_sgRNA_07384	AATTTGTTGTTGGAGGTAAC	KWMTBOMO00254_exon_2	AATTTGTTGTTGGAGGTAACTGG	Bomo_Chr1	8532309	8532332
Bm_sgRNA_19494	ATAGTTAATAATCTAAAAAA	KWMTBOMO00254_exon_2	ATAGTTAATAATCTAAAAAAGGG	Bomo_Chr1	8532253	8532276
Bm_sgRNA_22382	ATGGGTCGCAAATTTGTTGT	KWMTBOMO00254_exon_2	ATGGGTCGCAAATTTGTTGTTGG	Bomo_Chr1	8532319	8532342
Bm_sgRNA_58216	GGAGGTAACTGGAAGATGAA	KWMTBOMO00254_exon_2	GGAGGTAACTGGAAGATGAATGG	Bomo_Chr1	8532298	8532321
Bm_sgRNA_61363	GGTCGCAAATTTGTTGTTGG	KWMTBOMO00254_exon_2	GGTCGCAAATTTGTTGTTGGAGG	Bomo_Chr1	8532316	8532339
Bm_sgRNA_12638	ACTTGTTTGAATGTTTATCG	KWMTBOMO00255_exon_1	ACTTGTTTGAATGTTTATCGAGG	Bomo_Chr1	8534215	8534238
Bm_sgRNA_44867	CTTGTTTGAATGTTTATCGA	KWMTBOMO00255_exon_1	CTTGTTTGAATGTTTATCGAGGG	Bomo_Chr1	8534214	8534237
Bm_sgRNA_76143	TCGAAAGAAAGGCAGCATCA	KWMTBOMO00255_exon_2	TCGAAAGAAAGGCAGCATCAAGG	Bomo_Chr1	8534461	8534484
Bm_sgRNA_05342	AAGTTCCTTCTGAAACCTAT	KWMTBOMO00255_exon_3	AAGTTCCTTCTGAAACCTATTGG	Bomo_Chr1	8536341	8536364
Bm_sgRNA_12677	ACTTTCCAATAGGTTTCAGA	KWMTBOMO00255_exon_3	ACTTTCCAATAGGTTTCAGAAGG	Bomo_Chr1	8536346	8536369
Bm_sgRNA_16853	AGGTTTCAGAAGGAACTTCA	KWMTBOMO00255_exon_3	AGGTTTCAGAAGGAACTTCAAGG	Bomo_Chr1	8536336	8536359
Bm_sgRNA_88492	TTCTGCAACAACTTTCCAAT	KWMTBOMO00255_exon_3	TTCTGCAACAACTTTCCAATAGG	Bomo_Chr1	8536356	8536379
Bm_sgRNA_74154	TCAGACACTGCTGATGATAC	KWMTBOMO00255_exon_5	TCAGACACTGCTGATGATACTGG	Bomo_Chr1	8537448	8537471
Bm_sgRNA_01248	AAACTGTCAATTTTGACCGT	KWMTBOMO00255_promoter	AAACTGTCAATTTTGACCGTTGG	Bomo_Chr1	8534173	8534196
Bm_sgRNA_50319	GATATAAAGAATTATAAGTA	KWMTBOMO00256_exon_1	GATATAAAGAATTATAAGTACGG	Bomo_Chr1	8546714	8546737
Bm_sgRNA_78608	TCTGTTATAAGTTCATTAGT	KWMTBOMO00256_exon_1	TCTGTTATAAGTTCATTAGTCGG	Bomo_Chr1	8546735	8546758
Bm_sgRNA_01234	AAACTGCTGATACAATGAGA	KWMTBOMO00256_exon_2	AAACTGCTGATACAATGAGAGGG	Bomo_Chr1	8547533	8547556
Bm_sgRNA_01630	AAAGGCACATAATATGGTAG	KWMTBOMO00256_exon_2	AAAGGCACATAATATGGTAGAGG	Bomo_Chr1	8547501	8547524
Bm_sgRNA_24581	ATTTGTCAATGAAATGAAAA	KWMTBOMO00256_exon_2	ATTTGTCAATGAAATGAAAAAGG	Bomo_Chr1	8547483	8547506
Bm_sgRNA_45565	GAAACTGCTGATACAATGAG	KWMTBOMO00256_exon_2	GAAACTGCTGATACAATGAGAGG	Bomo_Chr1	8547532	8547555
Bm_sgRNA_79419	TGAAGATAACACTAGTGATA	KWMTBOMO00256_exon_2	TGAAGATAACACTAGTGATATGG	Bomo_Chr1	8547362	8547385
Bm_sgRNA_75875	TCCTACTGGAGACTTGCCTT	KWMTBOMO00256_exon_3	TCCTACTGGAGACTTGCCTTGGG	Bomo_Chr1	8547809	8547832
Bm_sgRNA_09893	ACCGTATTTAGGTTTATTGT	KWMTBOMO00256_promoter	ACCGTATTTAGGTTTATTGTAGG	Bomo_Chr1	8546572	8546595
[truncated: 119,909 more rows]
