# Supplementary material for: The Problem of Relations: A Rejoinder to Bradley
Source: HighWire-hosted journal article supplement (doi:10.1101/gr.278297.123), 1965-01-01
Supplement: Supplemental_Table_S2.xlsx [file Supplemental_Table_S2.xlsx]

## Sheet: Sheet1
Supplemental Table S2. Summary of the barcodes used in sgRNA sequencing
SampleID	5'-BarcodeSequence	3'-BarcodeSequence
SL1-1-1	TTATTCCG	GGAGATCT
SL1-1-2	TTATTCCG	GGTGTCAA
SL1-1-3	TTATTCCG	GCCAATTC
SL1-1-4	TTATTCCG	GCCTCAAG
SL1-1-5	TTATTCCG	GAACGACG
SL1-1-6	TTATTCCG	GTGTACGT
SL1-1-7	TTATTCCG	CGAATCGT
SL1-1-8	TTATTCCG	CGTGCATT
SL1-1-9	TTATTCCG	CGTCATGC
SL1-1-10	TTATTCCG	CGTTGGAG
SL1-1-11	TTATTCCG	CCGTTGTT
SL1-1-12	TTATTCCG	CCTTACCA
SL1-2-1	TTATAGGC	GGAGATCT
SL1-2-2	TTATAGGC	GGTGTCAA
SL1-2-3	TTATAGGC	GCCAATTC
SL1-2-4	TTATAGGC	GCCTCAAG
SL1-2-5	TTATAGGC	GAACGACG
SL1-2-6	TTATAGGC	GTGTACGT
SL1-2-7	TTATAGGC	CGAATCGT
SL1-2-8	TTATAGGC	CGTGCATT
SL1-2-9	TTATAGGC	CGTCATGC
SL1-2-10	TTATAGGC	CGTTGGAG
SL1-2-11	TTATAGGC	CCGTTGTT
SL1-2-12	TTATAGGC	CCTTACCA
SL1-3-1	TTAACTCC	GGAGATCT
SL1-3-2	TTAACTCC	GGTGTCAA
SL1-3-3	TTAACTCC	GCCAATTC
SL1-3-4	TTAACTCC	GCCTCAAG
SL1-3-5	TTAACTCC	GAACGACG
SL1-3-6	TTAACTCC	GTGTACGT
SL1-3-7	TTAACTCC	CGAATCGT
SL1-3-8	TTAACTCC	CGTGCATT
SL1-3-9	TTAACTCC	CGTCATGC
SL1-3-10	TTAACTCC	CGTTGGAG
SL1-3-11	TTAACTCC	CCGTTGTT
SL1-3-12	TTAACTCC	CCTTACCA
SL1-4-1	TTAAGAGG	GGAGATCT
SL1-4-2	TTAAGAGG	GGTGTCAA
SL1-4-3	TTAAGAGG	GCCAATTC
SL1-4-4	TTAAGAGG	GCCTCAAG
SL1-4-5	TTAAGAGG	GAACGACG
SL1-4-6	TTAAGAGG	GTGTACGT
SL1-4-7	TTAAGAGG	CGAATCGT
SL1-4-8	TTAAGAGG	CGTGCATT
SL1-4-9	TTAAGAGG	CGTCATGC
SL1-4-10	TTAAGAGG	CGTTGGAG
SL1-4-11	TTAAGAGG	CCGTTGTT
SL1-4-12	TTAAGAGG	CCTTACCA
SL1-5-1	TTACCGTT	GGAGATCT
SL1-5-2	TTACCGTT	GGTGTCAA
SL1-5-3	TTACCGTT	GCCAATTC
SL1-5-4	TTACCGTT	GCCTCAAG
SL1-5-5	TTACCGTT	GAACGACG
SL1-5-6	TTACCGTT	GTGTACGT
SL1-5-7	TTACCGTT	CGAATCGT
SL1-5-8	TTACCGTT	CGTGCATT
SL1-5-9	TTACCGTT	CGTCATGC
SL1-5-10	TTACCGTT	CGTTGGAG
SL1-5-11	TTACCGTT	CCGTTGTT
SL1-5-12	TTACCGTT	CCTTACCA
SL1-6-1	TTACGCAA	GGAGATCT
SL1-6-2	TTACGCAA	GGTGTCAA
SL1-6-3	TTACGCAA	GCCAATTC
SL1-6-4	TTACGCAA	GCCTCAAG
SL1-6-5	TTACGCAA	GAACGACG
SL1-6-6	TTACGCAA	GTGTACGT
SL1-6-7	TTACGCAA	CGAATCGT
SL1-6-8	TTACGCAA	CGTGCATT
SL1-6-9	TTACGCAA	CGTCATGC
SL1-6-10	TTACGCAA	CGTTGGAG
SL1-6-11	TTACGCAA	CCGTTGTT
SL1-6-12	TTACGCAA	CCTTACCA
SL1-7-1	TTCTCTTG	GGAGATCT
SL1-7-2	TTCTCTTG	GGTGTCAA
SL1-7-3	TTCTCTTG	GCCAATTC
SL1-7-4	TTCTCTTG	GCCTCAAG
SL1-7-5	TTCTCTTG	GAACGACG
SL1-7-6	TTCTCTTG	GTGTACGT
SL1-7-7	TTCTCTTG	CGAATCGT
SL1-7-8	TTCTCTTG	CGTGCATT
SL1-7-9	TTCTCTTG	CGTCATGC
SL1-7-10	TTCTCTTG	CGTTGGAG
SL1-7-11	TTCTCTTG	CCGTTGTT
SL1-7-12	TTCTCTTG	CCTTACCA
SL1-8-1	ATCGCTCT	GGAGATCT
SL1-8-2	ATCGCTCT	GGTGTCAA
SL1-8-3	ATCGCTCT	GCCAATTC
SL1-8-4	ATCGCTCT	GCCTCAAG
SL1-8-5	ATCGCTCT	GAACGACG
SL1-8-6	ATCGCTCT	GTGTACGT
SL1-8-7	ATCGCTCT	CGAATCGT
SL1-8-8	ATCGCTCT	CGTGCATT
SL1-8-9	ATCGCTCT	CGTCATGC
SL1-8-10	ATCGCTCT	CGTTGGAG
SL1-8-11	ATCGCTCT	CCGTTGTT
SL1-8-12	ATCGCTCT	CCTTACCA
SL2-1-1	TTCTGAAC	GGAGATCT
SL2-1-2	TTCTGAAC	GGTGTCAA
SL2-1-3	TTCTGAAC	GCCAATTC
SL2-1-4	TTCTGAAC	GCCTCAAG
SL2-1-5	TTCTGAAC	GAACGACG
SL2-1-6	TTCTGAAC	GTGTACGT
SL2-1-7	TTCTGAAC	CGAATCGT
SL2-1-8	TTCTGAAC	CGTGCATT
SL2-1-9	TTCTGAAC	CGTCATGC
SL2-1-10	TTCTGAAC	CGTTGGAG
SL2-1-11	TTCTGAAC	CCGTTGTT
SL2-1-12	TTCTGAAC	CCTTACCA
SL2-2-1	TTCATCTC	GGAGATCT
SL2-2-2	TTCATCTC	GGTGTCAA
SL2-2-3	TTCATCTC	GCCAATTC
SL2-2-4	TTCATCTC	GCCTCAAG
SL2-2-5	TTCATCTC	GAACGACG
SL2-2-6	TTCATCTC	GTGTACGT
SL2-2-7	TTCATCTC	CGAATCGT
SL2-2-8	TTCATCTC	CGTGCATT
SL2-2-9	TTCATCTC	CGTCATGC
SL2-2-10	TTCATCTC	CGTTGGAG
SL2-2-11	TTCATCTC	CCGTTGTT
SL2-2-12	TTCATCTC	CCTTACCA
SL2-3-1	TTCAAGCT	GGAGATCT
SL2-3-2	TTCAAGCT	GGTGTCAA
SL2-3-3	TTCAAGCT	GCCAATTC
SL2-3-4	TTCAAGCT	GCCTCAAG
SL2-3-5	TTCAAGCT	GAACGACG
SL2-3-6	TTCAAGCT	GTGTACGT
SL2-3-7	TTCAAGCT	CGAATCGT
SL2-3-8	TTCAAGCT	CGTGCATT
SL2-3-9	TTCAAGCT	CGTCATGC
SL2-3-10	TTCAAGCT	CGTTGGAG
SL2-3-11	TTCAAGCT	CCGTTGTT
SL2-3-12	TTCAAGCT	CCTTACCA
SL2-4-1	TTCCTTCA	GGAGATCT
SL2-4-2	TTCCTTCA	GGTGTCAA
SL2-4-3	TTCCTTCA	GCCAATTC
SL2-4-4	TTCCTTCA	GCCTCAAG
SL2-4-5	TTCCTTCA	GAACGACG
SL2-4-6	TTCCTTCA	GTGTACGT
SL2-4-7	TTCCTTCA	CGAATCGT
SL2-4-8	TTCCTTCA	CGTGCATT
SL2-4-9	TTCCTTCA	CGTCATGC
SL2-4-10	TTCCTTCA	CGTTGGAG
SL2-4-11	TTCCTTCA	CCGTTGTT
SL2-4-12	TTCCTTCA	CCTTACCA
SL2-5-1	TTCCACGG	GGAGATCT
SL2-5-2	TTCCACGG	GGTGTCAA
SL2-5-3	TTCCACGG	GCCAATTC
SL2-5-4	TTCCACGG	GCCTCAAG
SL2-5-5	TTCCACGG	GAACGACG
SL2-5-6	TTCCACGG	GTGTACGT
SL2-5-7	TTCCACGG	CGAATCGT
SL2-5-8	TTCCACGG	CGTGCATT
SL2-5-9	TTCCACGG	CGTCATGC
SL2-5-10	TTCCACGG	CGTTGGAG
SL2-5-11	TTCCACGG	CCGTTGTT
SL2-5-12	TTCCACGG	CCTTACCA
SL2-6-1	TTCGTAGT	GGAGATCT
SL2-6-2	TTCGTAGT	GGTGTCAA
SL2-6-3	TTCGTAGT	GCCAATTC
SL2-6-4	TTCGTAGT	GCCTCAAG
SL2-6-5	TTCGTAGT	GAACGACG
SL2-6-6	TTCGTAGT	GTGTACGT
SL2-6-7	TTCGTAGT	CGAATCGT
SL2-6-8	TTCGTAGT	CGTGCATT
SL2-6-9	TTCGTAGT	CGTCATGC
SL2-6-10	TTCGTAGT	CGTTGGAG
SL2-6-11	TTCGTAGT	CCGTTGTT
SL2-6-12	TTCGTAGT	CCTTACCA
SL2-7-1	TTCGCGAA	GGAGATCT
SL2-7-2	TTCGCGAA	GGTGTCAA
SL2-7-3	TTCGCGAA	GCCAATTC
SL2-7-4	TTCGCGAA	GCCTCAAG
SL2-7-5	TTCGCGAA	GAACGACG
SL2-7-6	TTCGCGAA	GTGTACGT
SL2-7-7	TTCGCGAA	CGAATCGT
SL2-7-8	TTCGCGAA	CGTGCATT
SL2-7-9	TTCGCGAA	CGTCATGC
SL2-7-10	TTCGCGAA	CGTTGGAG
SL2-7-11	TTCGCGAA	CCGTTGTT
SL2-7-12	TTCGCGAA	CCTTACCA
SL2-8-1	ATGAACGC	GGAGATCT
SL2-8-2	ATGAACGC	GGTGTCAA
SL2-8-3	ATGAACGC	GCCAATTC
SL2-8-4	ATGAACGC	GCCTCAAG
SL2-8-5	ATGAACGC	GAACGACG
SL2-8-6	ATGAACGC	GTGTACGT
SL2-8-7	ATGAACGC	CGAATCGT
SL2-8-8	ATGAACGC	CGTGCATT
SL2-8-9	ATGAACGC	CGTCATGC
SL2-8-10	ATGAACGC	CGTTGGAG
SL2-8-11	ATGAACGC	CCGTTGTT
SL2-8-12	ATGAACGC	CCTTACCA
SL3-1-1	TTGTCACA	GGAGATCT
SL3-1-2	TTGTCACA	GGTGTCAA
SL3-1-3	TTGTCACA	GCCAATTC
SL3-1-4	TTGTCACA	GCCTCAAG
SL3-1-5	TTGTCACA	GAACGACG
SL3-1-6	TTGTCACA	GTGTACGT
SL3-1-7	TTGTCACA	CGAATCGT
SL3-1-8	TTGTCACA	CGTGCATT
SL3-1-9	TTGTCACA	CGTCATGC
SL3-1-10	TTGTCACA	CGTTGGAG
SL3-1-11	TTGTCACA	CCGTTGTT
SL3-1-12	TTGTCACA	CCTTACCA
SL3-2-1	TTGTGTGT	GGAGATCT
SL3-2-2	TTGTGTGT	GGTGTCAA
SL3-2-3	TTGTGTGT	GCCAATTC
SL3-2-4	TTGTGTGT	GCCTCAAG
SL3-2-5	TTGTGTGT	GAACGACG
SL3-2-6	TTGTGTGT	GTGTACGT
SL3-2-7	TTGTGTGT	CGAATCGT
SL3-2-8	TTGTGTGT	CGTGCATT
SL3-2-9	TTGTGTGT	CGTCATGC
SL3-2-10	TTGTGTGT	CGTTGGAG
SL3-2-11	TTGTGTGT	CCGTTGTT
SL3-2-12	TTGTGTGT	CCTTACCA
SL3-3-1	TTGATGAG	GGAGATCT
SL3-3-2	TTGATGAG	GGTGTCAA
SL3-3-3	TTGATGAG	GCCAATTC
SL3-3-4	TTGATGAG	GCCTCAAG
SL3-3-5	TTGATGAG	GAACGACG
SL3-3-6	TTGATGAG	GTGTACGT
SL3-3-7	TTGATGAG	CGAATCGT
SL3-3-8	TTGATGAG	CGTGCATT
SL3-3-9	TTGATGAG	CGTCATGC
SL3-3-10	TTGATGAG	CGTTGGAG
SL3-3-11	TTGATGAG	CCGTTGTT
SL3-3-12	TTGATGAG	CCTTACCA
SL3-4-1	TTGCATTC	GGAGATCT
SL3-4-2	TTGCATTC	GGTGTCAA
SL3-4-3	TTGCATTC	GCCAATTC
SL3-4-4	TTGCATTC	GCCTCAAG
SL3-4-5	TTGCATTC	GAACGACG
SL3-4-6	TTGCATTC	GTGTACGT
SL3-4-7	TTGCATTC	CGAATCGT
SL3-4-8	TTGCATTC	CGTGCATT
SL3-4-9	TTGCATTC	CGTCATGC
SL3-4-10	TTGCATTC	CGTTGGAG
SL3-4-11	TTGCATTC	CCGTTGTT
SL3-4-12	TTGCATTC	CCTTACCA
SL3-5-1	TTGGACAT	GGAGATCT
SL3-5-2	TTGGACAT	GGTGTCAA
SL3-5-3	TTGGACAT	GCCAATTC
SL3-5-4	TTGGACAT	GCCTCAAG
SL3-5-5	TTGGACAT	GAACGACG
SL3-5-6	TTGGACAT	GTGTACGT
SL3-5-7	TTGGACAT	CGAATCGT
SL3-5-8	TTGGACAT	CGTGCATT
SL3-5-9	TTGGACAT	CGTCATGC
SL3-5-10	TTGGACAT	CGTTGGAG
SL3-5-11	TTGGACAT	CCGTTGTT
SL3-5-12	TTGGACAT	CCTTACCA
SL3-6-1	TATTAGCG	GGAGATCT
SL3-6-2	TATTAGCG	GGTGTCAA
SL3-6-3	TATTAGCG	GCCAATTC
SL3-6-4	TATTAGCG	GCCTCAAG
SL3-6-5	TATTAGCG	GAACGACG
SL3-6-6	TATTAGCG	GTGTACGT
SL3-6-7	TATTAGCG	CGAATCGT
SL3-6-8	TATTAGCG	CGTGCATT
SL3-6-9	TATTAGCG	CGTCATGC
SL3-6-10	TATTAGCG	CGTTGGAG
SL3-6-11	TATTAGCG	CCGTTGTT
SL3-6-12	TATTAGCG	CCTTACCA
SL3-7-1	TATTCTGC	GGAGATCT
SL3-7-2	TATTCTGC	GGTGTCAA
SL3-7-3	TATTCTGC	GCCAATTC
SL3-7-4	TATTCTGC	GCCTCAAG
SL3-7-5	TATTCTGC	GAACGACG
SL3-7-6	TATTCTGC	GTGTACGT
SL3-7-7	TATTCTGC	CGAATCGT
SL3-7-8	TATTCTGC	CGTGCATT
SL3-7-9	TATTCTGC	CGTCATGC
SL3-7-10	TATTCTGC	CGTTGGAG
SL3-7-11	TATTCTGC	CCGTTGTT
SL3-7-12	TATTCTGC	CCTTACCA
SL3-8-1	ATGGTCTA	GGAGATCT
SL3-8-2	ATGGTCTA	GGTGTCAA
SL3-8-3	ATGGTCTA	GCCAATTC
SL3-8-4	ATGGTCTA	GCCTCAAG
SL3-8-5	ATGGTCTA	GAACGACG
SL3-8-6	ATGGTCTA	GTGTACGT
SL3-8-7	ATGGTCTA	CGAATCGT
SL3-8-8	ATGGTCTA	CGTGCATT
SL3-8-9	ATGGTCTA	CGTCATGC
SL3-8-10	ATGGTCTA	CGTTGGAG
SL3-8-11	ATGGTCTA	CCGTTGTT
SL3-8-12	ATGGTCTA	CCTTACCA
SL4-1-1	TATATCGG	GGAGATCT
SL4-1-2	TATATCGG	GGTGTCAA
SL4-1-3	TATATCGG	GCCAATTC
SL4-1-4	TATATCGG	GCCTCAAG
SL4-1-5	TATATCGG	GAACGACG
SL4-1-6	TATATCGG	GTGTACGT
SL4-1-7	TATATCGG	CGAATCGT
SL4-1-8	TATATCGG	CGTGCATT
SL4-1-9	TATATCGG	CGTCATGC
SL4-1-10	TATATCGG	CGTTGGAG
SL4-1-11	TATATCGG	CCGTTGTT
SL4-1-12	TATATCGG	CCTTACCA
SL4-2-1	TATAGACC	GGAGATCT
SL4-2-2	TATAGACC	GGTGTCAA
SL4-2-3	TATAGACC	GCCAATTC
SL4-2-4	TATAGACC	GCCTCAAG
SL4-2-5	TATAGACC	GAACGACG
SL4-2-6	TATAGACC	GTGTACGT
SL4-2-7	TATAGACC	CGAATCGT
SL4-2-8	TATAGACC	CGTGCATT
SL4-2-9	TATAGACC	CGTCATGC
SL4-2-10	TATAGACC	CGTTGGAG
SL4-2-11	TATAGACC	CCGTTGTT
SL4-2-12	TATAGACC	CCTTACCA
SL4-3-1	TATCTGTC	GGAGATCT
SL4-3-2	TATCTGTC	GGTGTCAA
SL4-3-3	TATCTGTC	GCCAATTC
SL4-3-4	TATCTGTC	GCCTCAAG
SL4-3-5	TATCTGTC	GAACGACG
SL4-3-6	TATCTGTC	GTGTACGT
SL4-3-7	TATCTGTC	CGAATCGT
SL4-3-8	TATCTGTC	CGTGCATT
SL4-3-9	TATCTGTC	CGTCATGC
SL4-3-10	TATCTGTC	CGTTGGAG
SL4-3-11	TATCTGTC	CCGTTGTT
SL4-3-12	TATCTGTC	CCTTACCA
SL4-4-1	TATCCAAG	GGAGATCT
SL4-4-2	TATCCAAG	GGTGTCAA
SL4-4-3	TATCCAAG	GCCAATTC
SL4-4-4	TATCCAAG	GCCTCAAG
SL4-4-5	TATCCAAG	GAACGACG
SL4-4-6	TATCCAAG	GTGTACGT
SL4-4-7	TATCCAAG	CGAATCGT
SL4-4-8	TATCCAAG	CGTGCATT
SL4-4-9	TATCCAAG	CGTCATGC
SL4-4-10	TATCCAAG	CGTTGGAG
SL4-4-11	TATCCAAG	CCGTTGTT
SL4-4-12	TATCCAAG	CCTTACCA
SL4-5-1	TATGCCTT	GGAGATCT
SL4-5-2	TATGCCTT	GGTGTCAA
SL4-5-3	TATGCCTT	GCCAATTC
SL4-5-4	TATGCCTT	GCCTCAAG
SL4-5-5	TATGCCTT	GAACGACG
SL4-5-6	TATGCCTT	GTGTACGT
SL4-5-7	TATGCCTT	CGAATCGT
SL4-5-8	TATGCCTT	CGTGCATT
SL4-5-9	TATGCCTT	CGTCATGC
SL4-5-10	TATGCCTT	CGTTGGAG
SL4-5-11	TATGCCTT	CCGTTGTT
SL4-5-12	TATGCCTT	CCTTACCA
SL4-6-1	TAATGCTC	GGAGATCT
SL4-6-2	TAATGCTC	GGTGTCAA
SL4-6-3	TAATGCTC	GCCAATTC
SL4-6-4	TAATGCTC	GCCTCAAG
SL4-6-5	TAATGCTC	GAACGACG
SL4-6-6	TAATGCTC	GTGTACGT
SL4-6-7	TAATGCTC	CGAATCGT
SL4-6-8	TAATGCTC	CGTGCATT
SL4-6-9	TAATGCTC	CGTCATGC
SL4-6-10	TAATGCTC	CGTTGGAG
SL4-6-11	TAATGCTC	CCGTTGTT
SL4-6-12	TAATGCTC	CCTTACCA
SL4-7-1	TAACACCT	GGAGATCT
SL4-7-2	TAACACCT	GGTGTCAA
SL4-7-3	TAACACCT	GCCAATTC
SL4-7-4	TAACACCT	GCCTCAAG
SL4-7-5	TAACACCT	GAACGACG
SL4-7-6	TAACACCT	GTGTACGT
SL4-7-7	TAACACCT	CGAATCGT
SL4-7-8	TAACACCT	CGTGCATT
SL4-7-9	TAACACCT	CGTCATGC
SL4-7-10	TAACACCT	CGTTGGAG
SL4-7-11	TAACACCT	CCGTTGTT
SL4-7-12	TAACACCT	CCTTACCA
SL4-8-1	AATAGGAG	GGAGATCT
SL4-8-2	AATAGGAG	GGTGTCAA
SL4-8-3	AATAGGAG	GCCAATTC
SL4-8-4	AATAGGAG	GCCTCAAG
SL4-8-5	AATAGGAG	GAACGACG
SL4-8-6	AATAGGAG	GTGTACGT
SL4-8-7	AATAGGAG	CGAATCGT
SL4-8-8	AATAGGAG	CGTGCATT
SL4-8-9	AATAGGAG	CGTCATGC
SL4-8-10	AATAGGAG	CGTTGGAG
SL4-8-11	AATAGGAG	CCGTTGTT
SL4-8-12	AATAGGAG	CCTTACCA
SL5-1-1	TAAGTGCA	GGAGATCT
SL5-1-2	TAAGTGCA	GGTGTCAA
SL5-1-3	TAAGTGCA	GCCAATTC
SL5-1-4	TAAGTGCA	GCCTCAAG
SL5-1-5	TAAGTGCA	GAACGACG
SL5-1-6	TAAGTGCA	GTGTACGT
SL5-1-7	TAAGTGCA	CGAATCGT
SL5-1-8	TAAGTGCA	CGTGCATT
SL5-1-9	TAAGTGCA	CGTCATGC
SL5-1-10	TAAGTGCA	CGTTGGAG
SL5-1-11	TAAGTGCA	CCGTTGTT
SL5-1-12	TAAGTGCA	CCTTACCA
SL5-2-1	TAAGGTAG	GGAGATCT
SL5-2-2	TAAGGTAG	GGTGTCAA
SL5-2-3	TAAGGTAG	GCCAATTC
SL5-2-4	TAAGGTAG	GCCTCAAG
SL5-2-5	TAAGGTAG	GAACGACG
SL5-2-6	TAAGGTAG	GTGTACGT
SL5-2-7	TAAGGTAG	CGAATCGT
SL5-2-8	TAAGGTAG	CGTGCATT
SL5-2-9	TAAGGTAG	CGTCATGC
SL5-2-10	TAAGGTAG	CGTTGGAG
SL5-2-11	TAAGGTAG	CCGTTGTT
SL5-2-12	TAAGGTAG	CCTTACCA
SL5-3-1	TACACAGA	GGAGATCT
SL5-3-2	TACACAGA	GGTGTCAA
SL5-3-3	TACACAGA	GCCAATTC
SL5-3-4	TACACAGA	GCCTCAAG
SL5-3-5	TACACAGA	GAACGACG
SL5-3-6	TACACAGA	GTGTACGT
SL5-3-7	TACACAGA	CGAATCGT
SL5-3-8	TACACAGA	CGTGCATT
SL5-3-9	TACACAGA	CGTCATGC
SL5-3-10	TACACAGA	CGTTGGAG
SL5-3-11	TACACAGA	CCGTTGTT
SL5-3-12	TACACAGA	CCTTACCA
SL5-4-1	TACAGCAT	GGAGATCT
SL5-4-2	TACAGCAT	GGTGTCAA
SL5-4-3	TACAGCAT	GCCAATTC
SL5-4-4	TACAGCAT	GCCTCAAG
SL5-4-5	TACAGCAT	GAACGACG
SL5-4-6	TACAGCAT	GTGTACGT
SL5-4-7	TACAGCAT	CGAATCGT
SL5-4-8	TACAGCAT	CGTGCATT
SL5-4-9	TACAGCAT	CGTCATGC
SL5-4-10	TACAGCAT	CGTTGGAG
SL5-4-11	TACAGCAT	CCGTTGTT
SL5-4-12	TACAGCAT	CCTTACCA
SL5-5-1	TACGATCC	GGAGATCT
SL5-5-2	TACGATCC	GGTGTCAA
SL5-5-3	TACGATCC	GCCAATTC
SL5-5-4	TACGATCC	GCCTCAAG
SL5-5-5	TACGATCC	GAACGACG
SL5-5-6	TACGATCC	GTGTACGT
SL5-5-7	TACGATCC	CGAATCGT
SL5-5-8	TACGATCC	CGTGCATT
SL5-5-9	TACGATCC	CGTCATGC
SL5-5-10	TACGATCC	CGTTGGAG
SL5-5-11	TACGATCC	CCGTTGTT
SL5-5-12	TACGATCC	CCTTACCA
SL5-6-1	TAGTACGA	GGAGATCT
SL5-6-2	TAGTACGA	GGTGTCAA
SL5-6-3	TAGTACGA	GCCAATTC
SL5-6-4	TAGTACGA	GCCTCAAG
SL5-6-5	TAGTACGA	GAACGACG
SL5-6-6	TAGTACGA	GTGTACGT
SL5-6-7	TAGTACGA	CGAATCGT
SL5-6-8	TAGTACGA	CGTGCATT
SL5-6-9	TAGTACGA	CGTCATGC
SL5-6-10	TAGTACGA	CGTTGGAG
SL5-6-11	TAGTACGA	CCGTTGTT
SL5-6-12	TAGTACGA	CCTTACCA
SL5-7-1	TAGCGATT	GGAGATCT
SL5-7-2	TAGCGATT	GGTGTCAA
SL5-7-3	TAGCGATT	GCCAATTC
SL5-7-4	TAGCGATT	GCCTCAAG
SL5-7-5	TAGCGATT	GAACGACG
SL5-7-6	TAGCGATT	GTGTACGT
SL5-7-7	TAGCGATT	CGAATCGT
SL5-7-8	TAGCGATT	CGTGCATT
SL5-7-9	TAGCGATT	CGTCATGC
SL5-7-10	TAGCGATT	CGTTGGAG
SL5-7-11	TAGCGATT	CCGTTGTT
SL5-7-12	TAGCGATT	CCTTACCA
SL5-8-1	AATCCGCA	GGAGATCT
SL5-8-2	AATCCGCA	GGTGTCAA
SL5-8-3	AATCCGCA	GCCAATTC
SL5-8-4	AATCCGCA	GCCTCAAG
SL5-8-5	AATCCGCA	GAACGACG
SL5-8-6	AATCCGCA	GTGTACGT
SL5-8-7	AATCCGCA	CGAATCGT
SL5-8-8	AATCCGCA	CGTGCATT
SL5-8-9	AATCCGCA	CGTCATGC
SL5-8-10	AATCCGCA	CGTTGGAG
SL5-8-11	AATCCGCA	CCGTTGTT
SL5-8-12	AATCCGCA	CCTTACCA
SL6-1-1	TAGGTAAC	GGAGATCT
SL6-1-2	TAGGTAAC	GGTGTCAA
SL6-1-3	TAGGTAAC	GCCAATTC
SL6-1-4	TAGGTAAC	GCCTCAAG
SL6-1-5	TAGGTAAC	GAACGACG
SL6-1-6	TAGGTAAC	GTGTACGT
SL6-1-7	TAGGTAAC	CGAATCGT
SL6-1-8	TAGGTAAC	CGTGCATT
SL6-1-9	TAGGTAAC	CGTCATGC
SL6-1-10	TAGGTAAC	CGTTGGAG
SL6-1-11	TAGGTAAC	CCGTTGTT
SL6-1-12	TAGGTAAC	CCTTACCA
SL6-2-1	TCTTACAC	GGAGATCT
SL6-2-2	TCTTACAC	GGTGTCAA
SL6-2-3	TCTTACAC	GCCAATTC
SL6-2-4	TCTTACAC	GCCTCAAG
SL6-2-5	TCTTACAC	GAACGACG
SL6-2-6	TCTTACAC	GTGTACGT
SL6-2-7	TCTTACAC	CGAATCGT
SL6-2-8	TCTTACAC	CGTGCATT
SL6-2-9	TCTTACAC	CGTCATGC
SL6-2-10	TCTTACAC	CGTTGGAG
SL6-2-11	TCTTACAC	CCGTTGTT
SL6-2-12	TCTTACAC	CCTTACCA
SL6-3-1	TCTTCGTA	GGAGATCT
SL6-3-2	TCTTCGTA	GGTGTCAA
SL6-3-3	TCTTCGTA	GCCAATTC
SL6-3-4	TCTTCGTA	GCCTCAAG
SL6-3-5	TCTTCGTA	GAACGACG
SL6-3-6	TCTTCGTA	GTGTACGT
SL6-3-7	TCTTCGTA	CGAATCGT
SL6-3-8	TCTTCGTA	CGTGCATT
SL6-3-9	TCTTCGTA	CGTCATGC
SL6-3-10	TCTTCGTA	CGTTGGAG
SL6-3-11	TCTTCGTA	CCGTTGTT
SL6-3-12	TCTTCGTA	CCTTACCA
SL6-4-1	TCTAGTTG	GGAGATCT
SL6-4-2	TCTAGTTG	GGTGTCAA
SL6-4-3	TCTAGTTG	GCCAATTC
SL6-4-4	TCTAGTTG	GCCTCAAG
SL6-4-5	TCTAGTTG	GAACGACG
SL6-4-6	TCTAGTTG	GTGTACGT
SL6-4-7	TCTAGTTG	CGAATCGT
SL6-4-8	TCTAGTTG	CGTGCATT
SL6-4-9	TCTAGTTG	CGTCATGC
SL6-4-10	TCTAGTTG	CGTTGGAG
SL6-4-11	TCTAGTTG	CCGTTGTT
SL6-4-12	TCTAGTTG	CCTTACCA
SL6-5-1	TCTCTAGA	GGAGATCT
SL6-5-2	TCTCTAGA	GGTGTCAA
SL6-5-3	TCTCTAGA	GCCAATTC
SL6-5-4	TCTCTAGA	GCCTCAAG
SL6-5-5	TCTCTAGA	GAACGACG
SL6-5-6	TCTCTAGA	GTGTACGT
SL6-5-7	TCTCTAGA	CGAATCGT
SL6-5-8	TCTCTAGA	CGTGCATT
SL6-5-9	TCTCTAGA	CGTCATGC
SL6-5-10	TCTCTAGA	CGTTGGAG
SL6-5-11	TCTCTAGA	CCGTTGTT
SL6-5-12	TCTCTAGA	CCTTACCA
SL6-6-1	TCTCCTCT	GGAGATCT
SL6-6-2	TCTCCTCT	GGTGTCAA
SL6-6-3	TCTCCTCT	GCCAATTC
SL6-6-4	TCTCCTCT	GCCTCAAG
SL6-6-5	TCTCCTCT	GAACGACG
SL6-6-6	TCTCCTCT	GTGTACGT
SL6-6-7	TCTCCTCT	CGAATCGT
SL6-6-8	TCTCCTCT	CGTGCATT
SL6-6-9	TCTCCTCT	CGTCATGC
SL6-6-10	TCTCCTCT	CGTTGGAG
SL6-6-11	TCTCCTCT	CCGTTGTT
SL6-6-12	TCTCCTCT	CCTTACCA
SL6-7-1	TCTGTGAT	GGAGATCT
SL6-7-2	TCTGTGAT	GGTGTCAA
SL6-7-3	TCTGTGAT	GCCAATTC
SL6-7-4	TCTGTGAT	GCCTCAAG
SL6-7-5	TCTGTGAT	GAACGACG
SL6-7-6	TCTGTGAT	GTGTACGT
SL6-7-7	TCTGTGAT	CGAATCGT
SL6-7-8	TCTGTGAT	CGTGCATT
SL6-7-9	TCTGTGAT	CGTCATGC
SL6-7-10	TCTGTGAT	CGTTGGAG
SL6-7-11	TCTGTGAT	CCGTTGTT
SL6-7-12	TCTGTGAT	CCTTACCA
SL6-8-1	AACTTACG	GGAGATCT
SL6-8-2	AACTTACG	GGTGTCAA
SL6-8-3	AACTTACG	GCCAATTC
SL6-8-4	AACTTACG	GCCTCAAG
SL6-8-5	AACTTACG	GAACGACG
SL6-8-6	AACTTACG	GTGTACGT
SL6-8-7	AACTTACG	CGAATCGT
SL6-8-8	AACTTACG	CGTGCATT
SL6-8-9	AACTTACG	CGTCATGC
SL6-8-10	AACTTACG	CGTTGGAG
SL6-8-11	AACTTACG	CCGTTGTT
SL6-8-12	AACTTACG	CCTTACCA
SL7-1-1	TCTGGCCA	GGAGATCT
SL7-1-2	TCTGGCCA	GGTGTCAA
SL7-1-3	TCTGGCCA	GCCAATTC
SL7-1-4	TCTGGCCA	GCCTCAAG
SL7-1-5	TCTGGCCA	GAACGACG
SL7-1-6	TCTGGCCA	GTGTACGT
SL7-1-7	TCTGGCCA	CGAATCGT
SL7-1-8	TCTGGCCA	CGTGCATT
SL7-1-9	TCTGGCCA	CGTCATGC
SL7-1-10	TCTGGCCA	CGTTGGAG
SL7-1-11	TCTGGCCA	CCGTTGTT
SL7-1-12	TCTGGCCA	CCTTACCA
SL7-2-1	TCATCAGT	GGAGATCT
SL7-2-2	TCATCAGT	GGTGTCAA
SL7-2-3	TCATCAGT	GCCAATTC
SL7-2-4	TCATCAGT	GCCTCAAG
SL7-2-5	TCATCAGT	GAACGACG
SL7-2-6	TCATCAGT	GTGTACGT
SL7-2-7	TCATCAGT	CGAATCGT
SL7-2-8	TCATCAGT	CGTGCATT
SL7-2-9	TCATCAGT	CGTCATGC
SL7-2-10	TCATCAGT	CGTTGGAG
SL7-2-11	TCATCAGT	CCGTTGTT
SL7-2-12	TCATCAGT	CCTTACCA
SL7-3-1	TCAACCAG	GGAGATCT
SL7-3-2	TCAACCAG	GGTGTCAA
SL7-3-3	TCAACCAG	GCCAATTC
SL7-3-4	TCAACCAG	GCCTCAAG
SL7-3-5	TCAACCAG	GAACGACG
SL7-3-6	TCAACCAG	GTGTACGT
SL7-3-7	TCAACCAG	CGAATCGT
SL7-3-8	TCAACCAG	CGTGCATT
SL7-3-9	TCAACCAG	CGTCATGC
SL7-3-10	TCAACCAG	CGTTGGAG
SL7-3-11	TCAACCAG	CCGTTGTT
SL7-3-12	TCAACCAG	CCTTACCA
SL7-4-1	TCACTTAC	GGAGATCT
SL7-4-2	TCACTTAC	GGTGTCAA
SL7-4-3	TCACTTAC	GCCAATTC
SL7-4-4	TCACTTAC	GCCTCAAG
SL7-4-5	TCACTTAC	GAACGACG
SL7-4-6	TCACTTAC	GTGTACGT
SL7-4-7	TCACTTAC	CGAATCGT
SL7-4-8	TCACTTAC	CGTGCATT
SL7-4-9	TCACTTAC	CGTCATGC
SL7-4-10	TCACTTAC	CGTTGGAG
SL7-4-11	TCACTTAC	CCGTTGTT
SL7-4-12	TCACTTAC	CCTTACCA
SL7-5-1	TCACAATG	GGAGATCT
SL7-5-2	TCACAATG	GGTGTCAA
SL7-5-3	TCACAATG	GCCAATTC
SL7-5-4	TCACAATG	GCCTCAAG
SL7-5-5	TCACAATG	GAACGACG
SL7-5-6	TCACAATG	GTGTACGT
SL7-5-7	TCACAATG	CGAATCGT
SL7-5-8	TCACAATG	CGTGCATT
SL7-5-9	TCACAATG	CGTCATGC
SL7-5-10	TCACAATG	CGTTGGAG
SL7-5-11	TCACAATG	CCGTTGTT
SL7-5-12	TCACAATG	CCTTACCA
SL7-6-1	TCAGATGA	GGAGATCT
SL7-6-2	TCAGATGA	GGTGTCAA
SL7-6-3	TCAGATGA	GCCAATTC
SL7-6-4	TCAGATGA	GCCTCAAG
SL7-6-5	TCAGATGA	GAACGACG
SL7-6-6	TCAGATGA	GTGTACGT
SL7-6-7	TCAGATGA	CGAATCGT
SL7-6-8	TCAGATGA	CGTGCATT
SL7-6-9	TCAGATGA	CGTCATGC
SL7-6-10	TCAGATGA	CGTTGGAG
SL7-6-11	TCAGATGA	CCGTTGTT
SL7-6-12	TCAGATGA	CCTTACCA
SL7-7-1	TCCTTGCC	GGAGATCT
SL7-7-2	TCCTTGCC	GGTGTCAA
SL7-7-3	TCCTTGCC	GCCAATTC
SL7-7-4	TCCTTGCC	GCCTCAAG
SL7-7-5	TCCTTGCC	GAACGACG
SL7-7-6	TCCTTGCC	GTGTACGT
SL7-7-7	TCCTTGCC	CGAATCGT
SL7-7-8	TCCTTGCC	CGTGCATT
SL7-7-9	TCCTTGCC	CGTCATGC
SL7-7-10	TCCTTGCC	CGTTGGAG
SL7-7-11	TCCTTGCC	CCGTTGTT
SL7-7-12	TCCTTGCC	CCTTACCA
SL7-8-1	AACTCCTA	GGAGATCT
SL7-8-2	AACTCCTA	GGTGTCAA
SL7-8-3	AACTCCTA	GCCAATTC
SL7-8-4	AACTCCTA	GCCTCAAG
SL7-8-5	AACTCCTA	GAACGACG
SL7-8-6	AACTCCTA	GTGTACGT
SL7-8-7	AACTCCTA	CGAATCGT
SL7-8-8	AACTCCTA	CGTGCATT
SL7-8-9	AACTCCTA	CGTCATGC
SL7-8-10	AACTCCTA	CGTTGGAG
SL7-8-11	AACTCCTA	CCGTTGTT
SL7-8-12	AACTCCTA	CCTTACCA
SL8-1-1	TCCGCATC	GGAGATCT
SL8-1-2	TCCGCATC	GGTGTCAA
SL8-1-3	TCCGCATC	GCCAATTC
SL8-1-4	TCCGCATC	GCCTCAAG
SL8-1-5	TCCGCATC	GAACGACG
SL8-1-6	TCCGCATC	GTGTACGT
SL8-1-7	TCCGCATC	CGAATCGT
SL8-1-8	TCCGCATC	CGTGCATT
SL8-1-9	TCCGCATC	CGTCATGC
SL8-1-10	TCCGCATC	CGTTGGAG
SL8-1-11	TCCGCATC	CCGTTGTT
SL8-1-12	TCCGCATC	CCTTACCA
SL8-2-1	TCGTTCTT	GGAGATCT
SL8-2-2	TCGTTCTT	GGTGTCAA
SL8-2-3	TCGTTCTT	GCCAATTC
SL8-2-4	TCGTTCTT	GCCTCAAG
SL8-2-5	TCGTTCTT	GAACGACG
SL8-2-6	TCGTTCTT	GTGTACGT
SL8-2-7	TCGTTCTT	CGAATCGT
SL8-2-8	TCGTTCTT	CGTGCATT
SL8-2-9	TCGTTCTT	CGTCATGC
SL8-2-10	TCGTTCTT	CGTTGGAG
SL8-2-11	TCGTTCTT	CCGTTGTT
SL8-2-12	TCGTTCTT	CCTTACCA
SL8-3-1	TCGCAGCA	GGAGATCT
SL8-3-2	TCGCAGCA	GGTGTCAA
SL8-3-3	TCGCAGCA	GCCAATTC
SL8-3-4	TCGCAGCA	GCCTCAAG
SL8-3-5	TCGCAGCA	GAACGACG
SL8-3-6	TCGCAGCA	GTGTACGT
SL8-3-7	TCGCAGCA	CGAATCGT
SL8-3-8	TCGCAGCA	CGTGCATT
SL8-3-9	TCGCAGCA	CGTCATGC
SL8-3-10	TCGCAGCA	CGTTGGAG
SL8-3-11	TCGCAGCA	CCGTTGTT
SL8-3-12	TCGCAGCA	CCTTACCA
SL8-4-1	TCGGTTCG	GGAGATCT
SL8-4-2	TCGGTTCG	GGTGTCAA
SL8-4-3	TCGGTTCG	GCCAATTC
SL8-4-4	TCGGTTCG	GCCTCAAG
SL8-4-5	TCGGTTCG	GAACGACG
SL8-4-6	TCGGTTCG	GTGTACGT
SL8-4-7	TCGGTTCG	CGAATCGT
SL8-4-8	TCGGTTCG	CGTGCATT
SL8-4-9	TCGGTTCG	CGTCATGC
SL8-4-10	TCGGTTCG	CGTTGGAG
SL8-4-11	TCGGTTCG	CCGTTGTT
SL8-4-12	TCGGTTCG	CCTTACCA
SL8-5-1	TGTAAGGA	GGAGATCT
SL8-5-2	TGTAAGGA	GGTGTCAA
SL8-5-3	TGTAAGGA	GCCAATTC
SL8-5-4	TGTAAGGA	GCCTCAAG
SL8-5-5	TGTAAGGA	GAACGACG
SL8-5-6	TGTAAGGA	GTGTACGT
SL8-5-7	TGTAAGGA	CGAATCGT
SL8-5-8	TGTAAGGA	CGTGCATT
SL8-5-9	TGTAAGGA	CGTCATGC
SL8-5-10	TGTAAGGA	CGTTGGAG
SL8-5-11	TGTAAGGA	CCGTTGTT
SL8-5-12	TGTAAGGA	CCTTACCA
SL8-6-1	TGTCGCGT	GGAGATCT
SL8-6-2	TGTCGCGT	GGTGTCAA
SL8-6-3	TGTCGCGT	GCCAATTC
SL8-6-4	TGTCGCGT	GCCTCAAG
SL8-6-5	TGTCGCGT	GAACGACG
SL8-6-6	TGTCGCGT	GTGTACGT
SL8-6-7	TGTCGCGT	CGAATCGT
SL8-6-8	TGTCGCGT	CGTGCATT
SL8-6-9	TGTCGCGT	CGTCATGC
SL8-6-10	TGTCGCGT	CGTTGGAG
SL8-6-11	TGTCGCGT	CCGTTGTT
SL8-6-12	TGTCGCGT	CCTTACCA
SL8-7-1	TGTGTATG	GGAGATCT
SL8-7-2	TGTGTATG	GGTGTCAA
SL8-7-3	TGTGTATG	GCCAATTC
SL8-7-4	TGTGTATG	GCCTCAAG
SL8-7-5	TGTGTATG	GAACGACG
SL8-7-6	TGTGTATG	GTGTACGT
SL8-7-7	TGTGTATG	CGAATCGT
SL8-7-8	TGTGTATG	CGTGCATT
SL8-7-9	TGTGTATG	CGTCATGC
SL8-7-10	TGTGTATG	CGTTGGAG
SL8-7-11	TGTGTATG	CCGTTGTT
SL8-7-12	TGTGTATG	CCTTACCA
SL8-8-1	AACATTGC	GGAGATCT
SL8-8-2	AACATTGC	GGTGTCAA
SL8-8-3	AACATTGC	GCCAATTC
SL8-8-4	AACATTGC	GCCTCAAG
SL8-8-5	AACATTGC	GAACGACG
SL8-8-6	AACATTGC	GTGTACGT
SL8-8-7	AACATTGC	CGAATCGT
SL8-8-8	AACATTGC	CGTGCATT
SL8-8-9	AACATTGC	CGTCATGC
SL8-8-10	AACATTGC	CGTTGGAG
SL8-8-11	AACATTGC	CCGTTGTT
SL8-8-12	AACATTGC	CCTTACCA
SL9-1-1	TGATGTCA	GGAGATCT
SL9-1-2	TGATGTCA	GGTGTCAA
SL9-1-3	TGATGTCA	GCCAATTC
SL9-1-4	TGATGTCA	GCCTCAAG
SL9-1-5	TGATGTCA	GAACGACG
SL9-1-6	TGATGTCA	GTGTACGT
SL9-1-7	TGATGTCA	CGAATCGT
SL9-1-8	TGATGTCA	CGTGCATT
SL9-1-9	TGATGTCA	CGTCATGC
SL9-1-10	TGATGTCA	CGTTGGAG
SL9-1-11	TGATGTCA	CCGTTGTT
SL9-1-12	TGATGTCA	CCTTACCA
SL9-2-1	TGACCTGG	GGAGATCT
SL9-2-2	TGACCTGG	GGTGTCAA
SL9-2-3	TGACCTGG	GCCAATTC
SL9-2-4	TGACCTGG	GCCTCAAG
SL9-2-5	TGACCTGG	GAACGACG
SL9-2-6	TGACCTGG	GTGTACGT
SL9-2-7	TGACCTGG	CGAATCGT
SL9-2-8	TGACCTGG	CGTGCATT
SL9-2-9	TGACCTGG	CGTCATGC
SL9-2-10	TGACCTGG	CGTTGGAG
SL9-2-11	TGACCTGG	CCGTTGTT
SL9-2-12	TGACCTGG	CCTTACCA
SL9-3-1	TGAGTCGC	GGAGATCT
SL9-3-2	TGAGTCGC	GGTGTCAA
SL9-3-3	TGAGTCGC	GCCAATTC
SL9-3-4	TGAGTCGC	GCCTCAAG
SL9-3-5	TGAGTCGC	GAACGACG
SL9-3-6	TGAGTCGC	GTGTACGT
SL9-3-7	TGAGTCGC	CGAATCGT
SL9-3-8	TGAGTCGC	CGTGCATT
SL9-3-9	TGAGTCGC	CGTCATGC
SL9-3-10	TGAGTCGC	CGTTGGAG
SL9-3-11	TGAGTCGC	CCGTTGTT
SL9-3-12	TGAGTCGC	CCTTACCA
SL9-4-1	TGCTTCAA	GGAGATCT
SL9-4-2	TGCTTCAA	GGTGTCAA
SL9-4-3	TGCTTCAA	GCCAATTC
SL9-4-4	TGCTTCAA	GCCTCAAG
SL9-4-5	TGCTTCAA	GAACGACG
SL9-4-6	TGCTTCAA	GTGTACGT
SL9-4-7	TGCTTCAA	CGAATCGT
SL9-4-8	TGCTTCAA	CGTGCATT
SL9-4-9	TGCTTCAA	CGTCATGC
SL9-4-10	TGCTTCAA	CGTTGGAG
SL9-4-11	TGCTTCAA	CCGTTGTT
SL9-4-12	TGCTTCAA	CCTTACCA
SL9-5-1	TGCTGGTT	GGAGATCT
SL9-5-2	TGCTGGTT	GGTGTCAA
SL9-5-3	TGCTGGTT	GCCAATTC
SL9-5-4	TGCTGGTT	GCCTCAAG
SL9-5-5	TGCTGGTT	GAACGACG
SL9-5-6	TGCTGGTT	GTGTACGT
SL9-5-7	TGCTGGTT	CGAATCGT
SL9-5-8	TGCTGGTT	CGTGCATT
SL9-5-9	TGCTGGTT	CGTCATGC
SL9-5-10	TGCTGGTT	CGTTGGAG
SL9-5-11	TGCTGGTT	CCGTTGTT
SL9-5-12	TGCTGGTT	CCTTACCA
SL9-6-1	TGCAATAG	GGAGATCT
SL9-6-2	TGCAATAG	GGTGTCAA
SL9-6-3	TGCAATAG	GCCAATTC
SL9-6-4	TGCAATAG	GCCTCAAG
SL9-6-5	TGCAATAG	GAACGACG
SL9-6-6	TGCAATAG	GTGTACGT
SL9-6-7	TGCAATAG	CGAATCGT
SL9-6-8	TGCAATAG	CGTGCATT
SL9-6-9	TGCAATAG	CGTCATGC
SL9-6-10	TGCAATAG	CGTTGGAG
SL9-6-11	TGCAATAG	CCGTTGTT
SL9-6-12	TGCAATAG	CCTTACCA
SL9-7-1	TGGTCGAC	GGAGATCT
SL9-7-2	TGGTCGAC	GGTGTCAA
SL9-7-3	TGGTCGAC	GCCAATTC
SL9-7-4	TGGTCGAC	GCCTCAAG
SL9-7-5	TGGTCGAC	GAACGACG
SL9-7-6	TGGTCGAC	GTGTACGT
SL9-7-7	TGGTCGAC	CGAATCGT
SL9-7-8	TGGTCGAC	CGTGCATT
SL9-7-9	TGGTCGAC	CGTCATGC
SL9-7-10	TGGTCGAC	CGTTGGAG
SL9-7-11	TGGTCGAC	CCGTTGTT
SL9-7-12	TGGTCGAC	CCTTACCA
SL9-8-1	AACCTGAT	GGAGATCT
SL9-8-2	AACCTGAT	GGTGTCAA
SL9-8-3	AACCTGAT	GCCAATTC
SL9-8-4	AACCTGAT	GCCTCAAG
SL9-8-5	AACCTGAT	GAACGACG
SL9-8-6	AACCTGAT	GTGTACGT
SL9-8-7	AACCTGAT	CGAATCGT
SL9-8-8	AACCTGAT	CGTGCATT
SL9-8-9	AACCTGAT	CGTCATGC
SL9-8-10	AACCTGAT	CGTTGGAG
SL9-8-11	AACCTGAT	CCGTTGTT
SL9-8-12	AACCTGAT	CCTTACCA
SL10-1-1	TGGACTTA	GGAGATCT
SL10-1-2	TGGACTTA	GGTGTCAA
SL10-1-3	TGGACTTA	GCCAATTC
SL10-1-4	TGGACTTA	GCCTCAAG
SL10-1-5	TGGACTTA	GAACGACG
SL10-1-6	TGGACTTA	GTGTACGT
SL10-1-7	TGGACTTA	CGAATCGT
SL10-1-8	TGGACTTA	CGTGCATT
SL10-1-9	TGGACTTA	CGTCATGC
SL10-1-10	TGGACTTA	CGTTGGAG
SL10-1-11	TGGACTTA	CCGTTGTT
SL10-1-12	TGGACTTA	CCTTACCA
SL10-2-1	ATTATGCC	GGAGATCT
SL10-2-2	ATTATGCC	GGTGTCAA
SL10-2-3	ATTATGCC	GCCAATTC
SL10-2-4	ATTATGCC	GCCTCAAG
SL10-2-5	ATTATGCC	GAACGACG
SL10-2-6	ATTATGCC	GTGTACGT
SL10-2-7	ATTATGCC	CGAATCGT
SL10-2-8	ATTATGCC	CGTGCATT
SL10-2-9	ATTATGCC	CGTCATGC
SL10-2-10	ATTATGCC	CGTTGGAG
SL10-2-11	ATTATGCC	CCGTTGTT
SL10-2-12	ATTATGCC	CCTTACCA
SL10-3-1	ATTACTGG	GGAGATCT
SL10-3-2	ATTACTGG	GGTGTCAA
SL10-3-3	ATTACTGG	GCCAATTC
SL10-3-4	ATTACTGG	GCCTCAAG
SL10-3-5	ATTACTGG	GAACGACG
SL10-3-6	ATTACTGG	GTGTACGT
SL10-3-7	ATTACTGG	CGAATCGT
SL10-3-8	ATTACTGG	CGTGCATT
SL10-3-9	ATTACTGG	CGTCATGC
SL10-3-10	ATTACTGG	CGTTGGAG
SL10-3-11	ATTACTGG	CCGTTGTT
SL10-3-12	ATTACTGG	CCTTACCA
SL10-4-1	ATTCTCAG	GGAGATCT
SL10-4-2	ATTCTCAG	GGTGTCAA
SL10-4-3	ATTCTCAG	GCCAATTC
SL10-4-4	ATTCTCAG	GCCTCAAG
SL10-4-5	ATTCTCAG	GAACGACG
SL10-4-6	ATTCTCAG	GTGTACGT
SL10-4-7	ATTCTCAG	CGAATCGT
SL10-4-8	ATTCTCAG	CGTGCATT
SL10-4-9	ATTCTCAG	CGTCATGC
SL10-4-10	ATTCTCAG	CGTTGGAG
SL10-4-11	ATTCTCAG	CCGTTGTT
SL10-4-12	ATTCTCAG	CCTTACCA
SL10-5-1	ATTCAGGT	GGAGATCT
SL10-5-2	ATTCAGGT	GGTGTCAA
SL10-5-3	ATTCAGGT	GCCAATTC
SL10-5-4	ATTCAGGT	GCCTCAAG
SL10-5-5	ATTCAGGT	GAACGACG
SL10-5-6	ATTCAGGT	GTGTACGT
SL10-5-7	ATTCAGGT	CGAATCGT
SL10-5-8	ATTCAGGT	CGTGCATT
SL10-5-9	ATTCAGGT	CGTCATGC
SL10-5-10	ATTCAGGT	CGTTGGAG
SL10-5-11	ATTCAGGT	CCGTTGTT
SL10-5-12	ATTCAGGT	CCTTACCA
SL10-6-1	ATTCCATC	GGAGATCT
SL10-6-2	ATTCCATC	GGTGTCAA
SL10-6-3	ATTCCATC	GCCAATTC
SL10-6-4	ATTCCATC	GCCTCAAG
SL10-6-5	ATTCCATC	GAACGACG
SL10-6-6	ATTCCATC	GTGTACGT
SL10-6-7	ATTCCATC	CGAATCGT
SL10-6-8	ATTCCATC	CGTGCATT
SL10-6-9	ATTCCATC	CGTCATGC
SL10-6-10	ATTCCATC	CGTTGGAG
SL10-6-11	ATTCCATC	CCGTTGTT
SL10-6-12	ATTCCATC	CCTTACCA
SL10-7-1	ATTGGTAC	GGAGATCT
SL10-7-2	ATTGGTAC	GGTGTCAA
SL10-7-3	ATTGGTAC	GCCAATTC
SL10-7-4	ATTGGTAC	GCCTCAAG
SL10-7-5	ATTGGTAC	GAACGACG
SL10-7-6	ATTGGTAC	GTGTACGT
SL10-7-7	ATTGGTAC	CGAATCGT
SL10-7-8	ATTGGTAC	CGTGCATT
SL10-7-9	ATTGGTAC	CGTCATGC
SL10-7-10	ATTGGTAC	CGTTGGAG
SL10-7-11	ATTGGTAC	CCGTTGTT
SL10-7-12	ATTGGTAC	CCTTACCA
SL10-8-1	AACCGTTG	GGAGATCT
SL10-8-2	AACCGTTG	GGTGTCAA
SL10-8-3	AACCGTTG	GCCAATTC
SL10-8-4	AACCGTTG	GCCTCAAG
SL10-8-5	AACCGTTG	GAACGACG
SL10-8-6	AACCGTTG	GTGTACGT
SL10-8-7	AACCGTTG	CGAATCGT
SL10-8-8	AACCGTTG	CGTGCATT
SL10-8-9	AACCGTTG	CGTCATGC
SL10-8-10	AACCGTTG	CGTTGGAG
SL10-8-11	AACCGTTG	CCGTTGTT
SL10-8-12	AACCGTTG	CCTTACCA
SL11-1-1	ATATCCAC	GGAGATCT
SL11-1-2	ATATCCAC	GGTGTCAA
SL11-1-3	ATATCCAC	GCCAATTC
SL11-1-4	ATATCCAC	GCCTCAAG
SL11-1-5	ATATCCAC	GAACGACG
SL11-1-6	ATATCCAC	GTGTACGT
SL11-1-7	ATATCCAC	CGAATCGT
SL11-1-8	ATATCCAC	CGTGCATT
SL11-1-9	ATATCCAC	CGTCATGC
SL11-1-10	ATATCCAC	CGTTGGAG
SL11-1-11	ATATCCAC	CCGTTGTT
SL11-1-12	ATATCCAC	CCTTACCA
SL11-2-1	ATATGGTG	GGAGATCT
SL11-2-2	ATATGGTG	GGTGTCAA
SL11-2-3	ATATGGTG	GCCAATTC
SL11-2-4	ATATGGTG	GCCTCAAG
SL11-2-5	ATATGGTG	GAACGACG
SL11-2-6	ATATGGTG	GTGTACGT
SL11-2-7	ATATGGTG	CGAATCGT
SL11-2-8	ATATGGTG	CGTGCATT
SL11-2-9	ATATGGTG	CGTCATGC
SL11-2-10	ATATGGTG	CGTTGGAG
SL11-2-11	ATATGGTG	CCGTTGTT
SL11-2-12	ATATGGTG	CCTTACCA
SL11-3-1	ATAAGCCT	GGAGATCT
SL11-3-2	ATAAGCCT	GGTGTCAA
SL11-3-3	ATAAGCCT	GCCAATTC
SL11-3-4	ATAAGCCT	GCCTCAAG
SL11-3-5	ATAAGCCT	GAACGACG
SL11-3-6	ATAAGCCT	GTGTACGT
SL11-3-7	ATAAGCCT	CGAATCGT
SL11-3-8	ATAAGCCT	CGTGCATT
SL11-3-9	ATAAGCCT	CGTCATGC
SL11-3-10	ATAAGCCT	CGTTGGAG
SL11-3-11	ATAAGCCT	CCGTTGTT
SL11-3-12	ATAAGCCT	CCTTACCA
SL11-4-1	ATACATCG	GGAGATCT
SL11-4-2	ATACATCG	GGTGTCAA
SL11-4-3	ATACATCG	GCCAATTC
SL11-4-4	ATACATCG	GCCTCAAG
SL11-4-5	ATACATCG	GAACGACG
SL11-4-6	ATACATCG	GTGTACGT
SL11-4-7	ATACATCG	CGAATCGT
SL11-4-8	ATACATCG	CGTGCATT
SL11-4-9	ATACATCG	CGTCATGC
SL11-4-10	ATACATCG	CGTTGGAG
SL11-4-11	ATACATCG	CCGTTGTT
SL11-4-12	ATACATCG	CCTTACCA
SL11-5-1	ATAGCAGA	GGAGATCT
SL11-5-2	ATAGCAGA	GGTGTCAA
SL11-5-3	ATAGCAGA	GCCAATTC
SL11-5-4	ATAGCAGA	GCCTCAAG
SL11-5-5	ATAGCAGA	GAACGACG
SL11-5-6	ATAGCAGA	GTGTACGT
SL11-5-7	ATAGCAGA	CGAATCGT
SL11-5-8	ATAGCAGA	CGTGCATT
SL11-5-9	ATAGCAGA	CGTCATGC
SL11-5-10	ATAGCAGA	CGTTGGAG
SL11-5-11	ATAGCAGA	CCGTTGTT
SL11-5-12	ATAGCAGA	CCTTACCA
SL11-6-1	ATCTTGGA	GGAGATCT
SL11-6-2	ATCTTGGA	GGTGTCAA
SL11-6-3	ATCTTGGA	GCCAATTC
SL11-6-4	ATCTTGGA	GCCTCAAG
SL11-6-5	ATCTTGGA	GAACGACG
SL11-6-6	ATCTTGGA	GTGTACGT
SL11-6-7	ATCTTGGA	CGAATCGT
SL11-6-8	ATCTTGGA	CGTGCATT
SL11-6-9	ATCTTGGA	CGTCATGC
SL11-6-10	ATCTTGGA	CGTTGGAG
SL11-6-11	ATCTTGGA	CCGTTGTT
SL11-6-12	ATCTTGGA	CCTTACCA
SL11-7-1	ATCGAATG	GGAGATCT
SL11-7-2	ATCGAATG	GGTGTCAA
SL11-7-3	ATCGAATG	GCCAATTC
SL11-7-4	ATCGAATG	GCCTCAAG
SL11-7-5	ATCGAATG	GAACGACG
SL11-7-6	ATCGAATG	GTGTACGT
SL11-7-7	ATCGAATG	CGAATCGT
SL11-7-8	ATCGAATG	CGTGCATT
SL11-7-9	ATCGAATG	CGTCATGC
SL11-7-10	ATCGAATG	CGTTGGAG
SL11-7-11	ATCGAATG	CCGTTGTT
SL11-7-12	ATCGAATG	CCTTACCA
SL11-8-1	AACGACGT	GGAGATCT
SL11-8-2	AACGACGT	GGTGTCAA
SL11-8-3	AACGACGT	GCCAATTC
SL11-8-4	AACGACGT	GCCTCAAG
SL11-8-5	AACGACGT	GAACGACG
SL11-8-6	AACGACGT	GTGTACGT
SL11-8-7	AACGACGT	CGAATCGT
SL11-8-8	AACGACGT	CGTGCATT
SL11-8-9	AACGACGT	CGTCATGC
SL11-8-10	AACGACGT	CGTTGGAG
SL11-8-11	AACGACGT	CCGTTGTT
SL11-8-12	AACGACGT	CCTTACCA
