# Supplementary material for: The Problem of Relations: A Rejoinder to Bradley
Source: HighWire-hosted journal article supplement (doi:10.1101/gr.278297.123), 1965-01-01
Supplement: Supplemental_Table_S3.xlsx [file Supplemental_Table_S3.xlsx]

## Sheet: Sheet1
Supplemental Table S3. Summary of the barcodes used in target site sequencing
SampleID	BarcodeSequence	5'-PrimerSequence	3'-PrimerSequence
lxh_01_A01	TTACACAAGC	CCGGCGTACATTCATTGAGG	GCATCGCGGAATTTATTGTGGA
lxh_01_A02	TTCACGCTAA	GTGTTCTGTCATTGTCAAACCA	GCCGTACCTTTCTCCAACAT
lxh_01_A03	TTCAGTTGTG	GTGTTCTGTCATTGTCAAACCA	GCCGTACCTTTCTCCAACAT
lxh_01_A04	TTCAGGAAGT	CGCGGGACTCAGCTTTCAAT	GTCAACTCGCAGACTTCAGC
lxh_01_A05	TTCCTAGATG	CGCGGGACTCAGCTTTCAAT	GTCAACTCGCAGACTTCAGC
lxh_01_A06	TTCCACTGAT	TGTCTCGTTGTATCTGTCGTCC	CGTCACCCGCAGTTATAGTC
lxh_01_A07	TTCCGATTGA	TGTCTCGTTGTATCTGTCGTCC	CGTCACCCGCAGTTATAGTC
lxh_01_A08	TTCGTTCTTC	TTGTGCTGCCAGTCTAGTCC	GTTGTTGGGCGCGTTTATCT
lxh_01_A09	TTCGCAACAT	AGCATAATGAGGGTGACGGC	TGCATGTCCTGGTGTCTCAC
lxh_01_A10	TTATTACCGC	AGCATAATGAGGGTGACGGC	TGCATGTCCTGGTGTCTCAC
lxh_01_A11	TTATTCTGCG	AGCATAATGAGGGTGACGGC	TGCATGTCCTGGTGTCTCAC
lxh_01_A12	TTATAGGTCC	AAAGTGCGCGAATTCATACGG	ATTAAAGTCAAAGTGGGTTCCG
lxh_01_B01	TATAGCGGAA	AAAGTGCGCGAATTCATACGG	ATTAAAGTCAAAGTGGGTTCCG
lxh_01_B02	TATGCTTCGA	ACTTCATCGTCTGTCTGCCG	ACGGGAGATGAACTAATGGCA
lxh_01_B03	TAATGGTTGG	ACTTCATCGTCTGTCTGCCG	ACGGGAGATGAACTAATGGCA
lxh_01_B04	TAACACTCCA	GCCTTCGCCGCATTTCTTAG	CAGCCTTCAAACGTTCGCTT
lxh_01_B05	TAACCACATC	GCCTTCGCCGCATTTCTTAG	CAGCCTTCAAACGTTCGCTT
lxh_01_B08	TAACGTAGAG	AAATGCATAGAAACGCGGGC	CTGAGCGAGGTATCTGGGATC
lxh_01_B09	TAAGTTCGGT	AAATGCATAGAAACGCGGGC	CTGAGCGAGGTATCTGGGATC
lxh_01_B11	TTGTGTGGAT	GCCGGATCAGCTAGTTGTGT	CTACAACGTAAATGCCGCCC
lxh_01_B12	TTGAACCACT	TGCTGCCTACATGACTTGGT	GCTTGCTTTGTCCTTCCTGC
lxh_01_C01	TCTCATGTTC	TGCTGCCTACATGACTTGGT	GCTTGCTTTGTCCTTCCTGC
lxh_01_C02	TCAGAAGTAG	GGATTCCGCTCAAATTCATTCC	GGTGTGTGATGGGACGACTT
lxh_01_C03	TCCGTATTCT	GGATTCCGCTCAAATTCATTCC	GGTGTGTGATGGGACGACTT
lxh_01_C04	TCGTTAAGTG	ACAATAAAAGTATGCATGGCTG	TGGCCCAAACATACACCGTT
lxh_01_C05_1	TCGTCCATAT	ACTTGAGCGTCTGGTTGTGG	CACATCGCCGACACGCAC
lxh_01_C05_2	TCGAACTTGA	AGAGTTTCGTGACATGCGGT	ATAGTTACAACGGCTGCCCC
lxh_01_C06	TCGCGTTATA	AGAGTTTCGTGACATGCGGT	TGCACCACCCACCTTGAAAT
lxh_01_C07_1	TCGGATACTT	ACACGGCAAGAGACACGATT	TCATAGAGACGTCGCCATTAC
lxh_01_C07_2	TGTTGAGACA	GCACGGACAGCACCTATAGT	TGACATTACTCTGAAACTGGAA
lxh_01_C07_3	TGTAGTACCT	GTTGTGGCTTTGATAAAACAGT	AAGGTTTTGGAGGGAAGAATT
lxh_01_C08_1	TGTCAAGCAT	GCACGGACAGCACCTATAGT	TGACATTACTCTGAAACTGGAA
lxh_01_C08_2	TGTCCTAATG	GTTGTGGCTTTGATAAAACAGT	AAGGTTTTGGAGGGAAGAATT
lxh_01_C09_1	TGTGTCATGA	ACACGGCAAGAGACACGATT	TCATAGAGACGTCGCCATTAC
lxh_01_C09_2	TGTGGCTAAT	CTGGGCTGATAAAATGCGGTG	GGGGTTACTGCTGTCAACA
lxh_01_C09_3	TGAAGGATTC	TGACATCTAAAGTATCGGGTCA	TGCTGCATTTCGATTGATTC
lxh_01_C10_1	TAAGTAACCG	ACACGGCAAGAGACACGATT	TCATAGAGACGTCGCCATTAC
lxh_01_C10_2	TAAGGTGTCA	ACTGACACGAATTTGGTTTGAC	AAGAGCTCAATGTGCACAAC
lxh_01_C10_3	TACTAGCCAT	CTGGGCTGATAAAATGCGGTG	GGGGTTACTGCTGTCAACA
lxh_01_C10_4	TACTCCAAGA	TGACATCTAAAGTATCGGGTCA	TGCTGCATTTCGATTGATTC
lxh_01_C11_1	TACAACGTTG	ACACGGCAAGAGACACGATT	TCATAGAGACGTCGCCATTAC
lxh_01_C11_2	TAGAACACAC	ACCAATAATTAGGGACCCAGT	TGATCTCTACACAATGAACTGG
lxh_01_C11_3	TAGACAAGGT	ACTGACACGAATTTGGTTTGAC	AAGAGCTCAATGTGCACAAC
lxh_01_C11_4	TCTTAGCATG	ACTGACACGAATTTGGTTTGAC	AAGAGCTCAATGTGCACAAC
lxh_01_C12	TCTTCTTGCT	CCATAGTAGCGGTTAACTGGC	AAACGCGGGCAATGTCATAC
lxh_01_D01	ATTGTAGCAC	TTGGTTTTCTCCGATGGCCC	TGTGAACCTTTTCCCGGCAA
lxh_01_D02	ATACGTACGT	CGATAATTCCGGCGGTTTGG	AGGCAAAGCTCACAGTATCCT
lxh_01_D03	ATAGTCCGAA	CGATAATTCCGGCGGTTTGG	AGGCAAAGCTCACAGTATCCT
lxh_01_D04	ATCTCTTCAG	CCATAGTAGCGGTTAACTGGC	AAACGCGGGCAATGTCATAC
lxh_01_D05	ATCAAGTTGG	TCCGAAGTAAAGTAGCTCACCA	CCGTCAATTCTAGCTTCAACCC
lxh_01_D06	ATCACCAGTT	CGTTACGCGCCATCTTTT	GCGTATGGTCCAGTCGATGT
lxh_01_D07	ATCCAATCTC	CGTTACGCGCCATCTTTT	GCGTATGGTCCAGTCGATGT
lxh_01_D08	ATCGCAGTTA	CATGAGTGGAGCGACGTACT	TGGGTCATACAAGCGCGTTA
lxh_01_D09	ATGTTGCTAG	CATGAGTGGAGCGACGTACT	TGGGTCATACAAGCGCGTTA
lxh_01_D10	TGCACTGAAT	GGTGGACTGTGAGCTCATCC	CCACTACCATTGCCTGTTTACC
lxh_01_D11	TGGATATACG	GGTGGACTGTGAGCTCATCC	CCACTACCATTGCCTGTTTACC
lxh_01_D12	ATTATTCGGC	TGTTGGGTGTGTTCCTCGAG	TCAACAAAGCTCAGACAGGT
lxh_01_E01	AAGTTATCGG	TGTTGGGTGTGTTCCTCGAG	TCAACAAAGCTCAGACAGGT
lxh_01_E02	ACAGGTGAAT	CCAGTCGATCTACCGGGAGA	AACTCGCAACGGTACCATCA
lxh_01_E03	ACCTTCCATT	ACACGGCAAGAGACACGATT	TCATAGAGACGTCGCCATTAC
lxh_01_E04	ACCTATGTCT	GCCCAAATATTCCGAAGCGC	AGAAGCAGCCATCATCGACA
lxh_01_E05	AGTTAACGTC	GCCCAAATATTCCGAAGCGC	AGAAGCAGCCATCATCGACA
lxh_01_E06	AGTTACACAG	AGGTGGCGTTGAAGTATGGT	ACAAGTGAAGGACGGCTGTT
lxh_01_E07_1	AGTTGTTAGC	ACAGTTGACGCACTCACTCT	CTTGTGTGGGGCGATGTAGA
lxh_01_E07_2	AGTAGACTGA	CGTCGAAAGTCTCTATGAAGCC	GCTAAAGAAGGGGCTGATGT
lxh_01_E07_3	AGATACCTCA	GCCGCTGCCTATTATAAGTCG	CTTGTGCGAGGCCATGTAGA
lxh_01_E07_4	AGAATCAACC	TTGTGCTGCCAGTCTAGTCC	GTTGTTGGGCGCGTTTATCT
lxh_01_E08	AGAACTCGTA	TTGTGCTGCCAGTCTAGTCC	GTTGTTGGGCGCGTTTATCT
lxh_01_E09	AGACTTCAAG	CCGGCGTACATTCATTGAGG	GCATCGCGGAATTTATTGTGGA
lxh_01_E10	ATGTCACAGA	CAGAAGCCAAAACTGCCACA	CATTACTCCCCGCCTACACC
lxh_01_E11_1	ATGACTGTAC	GCATGTGCGGTATTTGGGC	TCATGCTGTTTCTGTAGGCGT
lxh_01_E11_2	ATGCTCGAAT	GTCAAAGCCACGAACACACC	TGAAATCGTTGGACCTCGGA
lxh_01_E12	ATGCGAAGTA	TCAGTAATGACGTCGGCTGT	TCCTTTCCGCGCAGAAGATT
lxh_01_F01	CTAGTCTATC	TCAGTAATGACGTCGGCTGT	TCCTTTCCGCGCAGAAGATT
lxh_01_F02	CTGAAGGTTA	AAAACAGTCCACGCCCGAAA	CAAATGCACCAAACTCACGC
lxh_01_F03	CATATAGGTG	TTGTGCTGCCAGTCTAGTCC	GTTGTTGGGCGCGTTTATCT
lxh_01_F04	CATAATCGCT	TTGTGCTGCCAGTCTAGTCC	GTTGTTGGGCGCGTTTATCT
lxh_01_F05	CATAGGTTAC	CGCGGGACTCAGCTTTCAAT	GTCAACTCGCAGACTTCAGC
lxh_01_F06_1	CATCGAATCA	ACTGCCTCCAACTTGAAGCT	TCCAGGGGAAGGGTTTAGGT
lxh_01_F06_2	CATGAACCAA	CGCGGGACTCAGCTTTCAAT	GTCAACTCGCAGACTTCAGC
lxh_01_F07	CATGCGTATT	TCGCCCAACCTGTGAGAAAA	ACTCGAAATTGTCTTCACTGGG
lxh_01_F08_1	CAATTGACGT	TCAGGAACCTCAGGACACCT	TTCGGTTGGCATGTCATCCA
lxh_01_F08_2	CAATATGGAC	TTCGGTTGGCATGTCATCCA	TCAGGAACCTCAGGACACCT
lxh_01_F09	CAATCATGCA	AGTTCTCTTGCAGATCGTCCTC	CGGCAACCACGATAAAAGCG
lxh_01_F10_1	AGACTATTGC	ACTGACACGAATTTGGTTTGAC	AAGAGCTCAATGTGCACAAC
lxh_01_F10_2	AGCTCTATTC	GGATACAGGTTCGTACAGTGGA	TGGAGATTCGCATTAACCAGT
lxh_01_F10_3	AGCTGATGAA	TGACATCTAAAGTATCGGGTCA	TGCTGCATTTCGATTGATTC
lxh_01_F11	AGGTATGATG	GTTCCAGGTCAGGCGTTACA	TCAAGTCAATCGGATGCATGA
lxh_01_F12_1	AGGTGAATCT	CGGCAGAAACAAACGCACTT	GCGCCATCTATGTCCCGAA
lxh_01_F12_2	AGGACATCTT	TCCGTTTGTATGCATCTCAGT	GGATACCCCGTGAAAGAGCT
lxh_01_G01	GAACTGATTG	TCCGTTTGTATGCATCTCAGT	GGATACCCCGTGAAAGAGCT
lxh_01_G02_1	GCATGTTCTT	ACACGGCAAGAGACACGATT	TCATAGAGACGTCGCCATTAC
lxh_01_G02_2	GCCTTATAGA	CCAGTAAGGGGTGGCAGAAA	TGAACTGGATGATGGACGAAGG
lxh_01_G02_3	GCGTATCAAT	CTGGGCTGATAAAATGCGGTG	GGGGTTACTGCTGTCAACA
lxh_01_G02_4	GGTATTCACA	TGACATCTAAAGTATCGGGTCA	TGCTGCATTTCGATTGATTC
lxh_01_G03_1	TTCTGCCAAG	ACACGGCAAGAGACACGATT	TCATAGAGACGTCGCCATTAC
lxh_01_G03_2	TTCTGCCAAG	CCAGTAAGGGGTGGCAGAAA	TGAACTGGATGATGGACGAAGG
lxh_01_G03_3	TTCAATGCGC	CTGGGCTGATAAAATGCGGTG	GGGGTTACTGCTGTCAACA
lxh_01_G03_4	TTGTAGACGG	TGACATCTAAAGTATCGGGTCA	TGCTGCATTTCGATTGATTC
lxh_01_G04	TTGATCGGTC	TGACATCTAAAGTATCGGGTCA	TGCTGCATTTCGATTGATTC
lxh_01_G05_1	TTGGAAGCCA	ACACGGCAAGAGACACGATT	TCATAGAGACGTCGCCATTAC
lxh_01_G05_2	TTGGCGTAAG	CTGGGCTGATAAAATGCGGTG	GGGGTTACTGCTGTCAACA
lxh_01_G06	TACTGAGGTC	GGTGGACCTCTCAACAACGA	GCGAACGAGGACTATGCGAA
lxh_01_G07	TACAGTCACC	GGTGGACCTCTCAACAACGA	GCGAACGAGGACTATGCGAA
lxh_01_G08	TACCTCCGTA	AAGTTCACGCATTGTCGCTT	CACCTGTTTAGTGTCATCGGA
lxh_01_G10	CAACAAGAGA	AAGTTCACGCATTGTCGCTT	CACCTGTTTAGTGTCATCGGA
lxh_01_G11_1	CACTCAGTAT	ATGTACTCACTTCAGGGGAA	TGGTTAGATGTGTTGGAAAGT
lxh_01_G11_2	CAGATCCTAA	TCTGTGATGCTGGTTTGGCT	CGCGTTAGGTGCTTTTCAGG
lxh_01_G12	CAGGAATTGT	ATGTACTCACTTCAGGGGAA	TGGTTAGATGTGTTGGAAAGT
lxh_01_H01	TGAGCGGATA	TTGGCCCCTAATGACGTCAC	ACCGGTGCAAGCTACAACTT
lxh_01_H03	ACTCAGTCCT	AGGTGGCGTTGAAGTATGGT	ACAAGTGAAGGACGGCTGTT
lxh_01_H04	ACATCTCACC	GTTCCAGGTCAGGCGTTACA	TCAAGTCAATCGGATGCATGA
lxh_01_H05	ACATGACCAG	GTTCCAGGTCAGGCGTTACA	TCAAGTCAATCGGATGCATGA
lxh_01_H06	ACAACCTGAG	TCAGTAATGACGTCGGCTGT	TCCTTTCCGCGCAGAAGATT
lxh_01_H07_1	ACAGCAACTC	TCAGTAATGACGTCGGCTGT	TCCTTTCCGCGCAGAAGATT
lxh_01_H07_2	ACCTAGAAGC	TTGTGACATCCCAGGTTTGT	CCAGCTGCGACCGAACTC
lxh_01_H08_1	ACGGTCTACA	CCTTTAGGCCGCGATGACTT	ACTCTAGTCCGTGGCCACTA
lxh_01_H08_2	AGTGTTGGCT	TGCGTGAGGGTTTTCAGTAGA	ACTTTGTTCTTTTGTGGGCT
lxh_01_H09_1	AGATCGTCGA	CCTTTAGGCCGCGATGACTT	ACTCTAGTCCGTGGCCACTA
lxh_01_H09_2	TTATTACCGC	CCTTTAGGCCGCGATGACTT	ACTCTAGTCCGTGGCCACTA
lxh_01_H10	TACCTGTAGC	CATTCTAGCCTTCTTCTTAGCA	TAGAACACAGTTCTGCCGCA
lxh_01_H11	TACGCCTTAC	GTTCACGTCCAGCTTCAGGT	CGCCGGACACCACGATATAG
lxh_01_H12_1	TAGTCTCTGC	CTGGTTCCGTAATGCTCCGT	TGACGCTGAACTGTATCGGA
lxh_01_H12_2	TAGTCGGACT	GTTCACGTCCAGCTTCAGGT	CGCCGGACACCACGATATAG
lxh_01_H12_3	TAGAGGCCTA	GTGTTACGTGCGCTGTCTG	TGAGCTCGTCCACCCATCTA
lxh_02_A01_1	TTATCTGAGG	CCTGTTCTGTGCCTCCATCA	GGCCAACGAGAACCTCAAGA
lxh_02_A01_2	TTATCGCGTT	GAATGAGGCTTTTGGACGGC	CGGAAATGGCTGAAAATGTTGA
lxh_02_A02	TTATGCGCTA	CCTGTTCTGTGCCTCCATCA	GGCCAACGAGAACCTCAAGA
lxh_02_A03	TTAATGGCAG	CATTCTAGCCTTCTTCTTAGCA	TAGAACACAGTTCTGCCGCA
lxh_02_A04	TTAACTAGCC	CATTCTAGCCTTCTTCTTAGCA	TAGAACACAGTTCTGCCGCA
lxh_02_A05	TTAACCTCGT	AGTAGCCTTTTCAATGTCCAAG	TTGAGAGAATTGGGCGCTGA
lxh_02_A06_1	TTAAGACTCG	ACCACACAGCCGCATACTTA	TCAAAATGATCGACTGGCAT
lxh_02_A06_2	TTACTGCACA	TTACGACAGAAATGAGCGGG	CAATTAACTCGGACGCTGCG
lxh_02_A07	TTACATCCTG	TCAGTAATGACGTCGGCTGT	TCCTTTCCGCGCAGAAGATT
lxh_02_A08	TTACCAGGAA	TCAGTAATGACGTCGGCTGT	TCCTTTCCGCGCAGAAGATT
lxh_02_A09	TTAGAGTGGA	GGCACATTTTGACCATTTATGA	CCCACAGCTCTACACAAAGGA
lxh_02_A10	TTAGCCATTG	GGCACATTTTGACCATTTATGA	CCCACAGCTCTACACAAAGGA
lxh_02_A11_1	TTAGGTTCAC	AAAGTGCGCGAATTCATACGG	ATTAAAGTCAAAGTGGGTTCCG
lxh_02_A11_2	TTCTTCGTGT	AGTCCCTGTTTAATGTCGCGT	CAGTCGCCGCATCAAAAGAA
lxh_02_A11_3	TTCTTGAGAC	TGTATGCAATGAGACCAGGT	AAGATAGCCTTTCACCCCTCA
lxh_02_A12_1	TTCTATCGCA	AAAGTGCGCGAATTCATACGG	ATTAAAGTCAAAGTGGGTTCCG
lxh_02_A12_2	TTCTCATACC	AGTCCCTGTTTAATGTCGCGT	CAGTCGCCGCATCAAAAGAA
lxh_02_A12_3	TTCATCACCA	TGTATGCAATGAGACCAGGT	AAGATAGCCTTTCACCCCTCA
lxh_02_B01_1	TTGCTTATCG	AAAGTGCGCGAATTCATACGG	ATTAAAGTCAAAGTGGGTTCCG
lxh_02_B01_2	TTGCTGTCTT	AGTCCCTGTTTAATGTCGCGT	CAGTCGCCGCATCAAAAGAA
lxh_02_B01_3	TTGCAACTAC	TGTATGCAATGAGACCAGGT	AAGATAGCCTTTCACCCCTCA
lxh_02_B02_1	TATTATGCCG	AGTCCCTGTTTAATGTCGCGT	CAGTCGCCGCATCAAAAGAA
lxh_02_B02_2	TATTACTGGC	TGTATGCAATGAGACCAGGT	AAGATAGCCTTTCACCCCTCA
lxh_02_B03	TATTCACGAG	CGCGGGACTCAGCTTTCAAT	GTCAACTCGCAGACTTCAGC
lxh_02_B04	TATTCGACTC	CGCGGGACTCAGCTTTCAAT	GTCAACTCGCAGACTTCAGC
lxh_02_B05	TATTGCCTCT	TGCGTGAGGGTTTTCAGTAGA	ACTTTGTTCTTTTGTGGGCT
lxh_02_B06	TATATCCAGG	CCTGTTCTGTGCCTCCATCA	GGCCAACGAGAACCTCAAGA
lxh_02_B07	TATACAGTCC	TGTTGGGTGTGTTCCTCGAG	TCAACAAAGCTCAGACAGGT
lxh_02_B08	TATCTTCCAC	TGTTGGGTGTGTTCCTCGAG	TCAACAAAGCTCAGACAGGT
lxh_02_B09	TATCTGAGCT	GCCCAAATATTCCGAAGCGC	AGAAGCAGCCATCATCGACA
lxh_02_B10	TATCAGCTGA	GCCCAAATATTCCGAAGCGC	AGAAGCAGCCATCATCGACA
lxh_02_B11_2	TATCGATCTG	CATGAGTGGAGCGACGTACT	TGGGTCATACAAGCGCGTTA
lxh_02_B11_3	TATGTCGCTT	CATGAGTGGAGCGACGTACT	TGGGTCATACAAGCGCGTTA
lxh_02_B12	TATGAGGAAC	CGTCAGTAGCACCGACTCAT	CCCCTGGAAGCTGTGAGTTT
lxh_02_C01	TCTTGAATGC	CGTCAGTAGCACCGACTCAT	CCCCTGGAAGCTGTGAGTTT
lxh_02_C02	TCTTGGTCAA	AGGGTCCCGATTTCCTCCAA	TCGCCATCCTCAACGTTCAA
lxh_02_C03	TCTATAGCGA	AGGGTCCCGATTTCCTCCAA	TCGCCATCCTCAACGTTCAA
lxh_02_C04	TCTACCTATC	GTGACACGACCCTCAGCTC	AGCAAGAGTAGGCACAAAGT
lxh_02_C05	TCTAGACGTT	GTGACACGACCCTCAGCTC	AGCAAGAGTAGGCACAAAGT
lxh_02_C06	TCTCTCTTAG	AAGTTCACGCATTGTCGCTT	CACCTGTTTAGTGTCATCGGA
lxh_02_C10	TCTGTTAACC	CGTCGAAAGTCTCTATGAAGCC	GCTAAAGAAGGGGCTGATGT
lxh_02_C11	TCATTCGAAC	CGTCGAAAGTCTCTATGAAGCC	GCTAAAGAAGGGGCTGATGT
lxh_02_C12	TCACCTATGA	AGTTCTCTTGCAGATCGTCCTC	CGGCAACCACGATAAAAGCG
lxh_02_D01	ATTATCGTCG	TGTGATGGTAGAAAGCTGGCT	GCATGCCAGCAGAGTTGATC
lxh_02_D02	ATTACAACGG	TGTGATGGTAGAAAGCTGGCT	GCATGCCAGCAGAGTTGATC
lxh_02_D03	ATTACGTGCA	TCTCGGCAAAGACACATCCA	GGTACTGGTGACGACGTGAG
lxh_02_D04	ATTAGGCCAT	TCTCGGCAAAGACACATCCA	GGTACTGGTGACGACGTGAG
lxh_02_D05	ATTCTCTCGA	TCAGTTATCCAAGCGCGTCT	ATGATGACTCGTGTGGCTCA
lxh_02_D06_1	ATTCATGGAG	TCAGTTATCCAAGCGCGTCT	ATGATGACTCGTGTGGCTCA
lxh_02_D06_2	ATTCCTCTCT	TCAGTTATCCAAGCGCGTCT	TGACTCGTGTGGCTCAGAAC
lxh_02_D07	ATTCGCATAC	TGTTGCTGAAATGTTGCCCG	TCGTTCTCCTTGAGCACAGG
lxh_02_D08	ATTGTGAGTG	TGTTGCTGAAATGTTGCCCG	TCGTTCTCCTTGAGCACAGG
lxh_02_D09	ATTGAACACG	GCGGTGCGGCAATAAACTTA	CGCTGCCTACCGTTGAATTT
lxh_02_D10_1	ATTGGATGGT	AGTTCTCTTGCAGATCGTCCTC	CGGCAACCACGATAAAAGCG
lxh_02_D10_2	ATATCAGCCT	CCATAGTCCACATACCGCCA	AAAAGTGACGAACCTGGCGA
lxh_02_D11	ATATGGAACG	CCATAGTCCACATACCGCCA	AAAAGTGACGAACCTGGCGA
lxh_02_D12	ATAAGAGAGC	AAAGTCTCGTGCTAAATTTGC	TCAGTTCTGAGGTTGGGCAG
lxh_02_E01	AATTCCTACG	AAAGTCTCGTGCTAAATTTGC	TCAGTTCTGAGGTTGGGCAG
lxh_02_E02_1	AATTGGAGGA	GGCTTGCAACTGGTATGTCC	GCGTTCGGGGTATGAGTGAA
lxh_02_E02_2	AATACGCTTG	TGTGATATCGTCGGCTGTGG	ATGCGTCAACCAATGGAAAC
lxh_02_E03_3	AACTTACTCC	TGAGCAACAGTACCATCGGA	TGATGTCACTGTCCAAAGTAGT
lxh_02_E04_3	AACAGCTTCA	TGAGCAACAGTACCATCGGA	TGATGTCACTGTCCAAAGTAGT
lxh_02_E05_3	AACGTGTGAT	TGAGCAACAGTACCATCGGA	TGATGTCACTGTCCAAAGTAGT
lxh_02_E06	AACGATCTAG	ACACCACAAACCAAGATCTCCT	TGGGAAATACACAGCGAAACT
lxh_02_E07	AACGAGACTA	GCAGATGACACAGAGGAAGCT	GGATATAGCAGACGTGAAGGC
lxh_02_E08	AAGTCTACCA	ATAGAGAGGACGCTGCCAAC	CGGCGAGAAACTCAATGGGT
lxh_02_E09_1	AAGTGCTGTT	ATAGAGAGGACGCTGCCAAC	CGGCGAGAAACTCAATGGGT
lxh_02_E09_2	AAGATGGTGT	TGCGCCATAAATTTGCCGAA	TCCGGGCTGTTTTGGTAGTT
lxh_02_E10_1	AAGAAGTACC	AAAAGCGTAGGGGAGAGCAC	CGTAGTGATACTGACCGGTGG
lxh_02_E10_2	AAGCCGTTAA	TTGCTATGTACGTCTGGTGT	TGTCAGTTTAAAACACCGATTC
lxh_02_E11_1	AAGGTCATTC	AAAAGCGTAGGGGAGAGCAC	CGTAGTGATACTGACCGGTGG
lxh_02_E11_2	ACTTATCCGA	TTGCTATGTACGTCTGGTGT	TGTCAGTTTAAAACACCGATTC
lxh_02_E12_1	ACTAACGAGT	AAAAGCGTAGGGGAGAGCAC	CGTAGTGATACTGACCGGTGG
lxh_02_E12_2	ACATTCATGG	AAAAGCGTAGGGGAGAGCAC	CGTAGTGATACTGACCGGTGG
lxh_02_E12_3	ACATTGTGTC	CACACACACACATGGTCACAC	GAGTGTCTCGCAGCGCTT
lxh_02_E12_4	ACAACGATCT	CGAGTTTGTTTGCTGCCACA	CCTTGCTTGAATTCACGTCAGA
lxh_02_E12_5	ACACAAGGTT	TTGCTATGTACGTCTGGTGT	TGTCAGTTTAAAACACCGATTC
lxh_02_E12_6	ACAGATAGCA	TTGCTATGTACGTCTGGTGT	TGTCAGTTTAAAACACCGATTC
lxh_02_F01	CTTAACTCTG	CGAGTTTGTTTGCTGCCACA	CCTTGCTTGAATTCACGTCAGA
lxh_02_F02	CTTCATTACC	AACGACCACAGTTCACCA	ACTGAGTTGCAATAGTAATCGT
lxh_02_F03	CTTCCTACAA	AACGACCACAGTTCACCA	ACTGAGTTGCAATAGTAATCGT
lxh_02_F04	CTTGTTGAGA	GAGCCAGTTGAGCACGAAAG	GTCTCTTACCGCCTCCATGT
lxh_02_F05	CTTGACATCT	GAGCCAGTTGAGCACGAAAG	GTCTCTTACCGCCTCCATGT
lxh_02_F06	CTATGTCTGA	TGGACGCAACGAAACCCTAA	ACGGCCATGCTCCTCTAAAT
lxh_02_F07	CTAAGGAGAA	TGCGACGTGACTTGTGAAGA	TGCCAGCTAACGAACAAGGA
lxh_02_F08	CTAGAGCAAT	TGCGACGTGACTTGTGAAGA	TGCCAGCTAACGAACAAGGA
lxh_02_F09	CTCTGAATTG	GAGGTCCTCAAATAGAATGCT	GCCACTGACTGTAGAGCGTT
lxh_02_F10	CTCATACCTT	GAGGTCCTCAAATAGAATGCT	GCCACTGACTGTAGAGCGTT
lxh_02_F12	CTGTAATGAG	CTAAGCACAGTGAGATCCGGT	GTTCCCCAGCAGCCTCAG
lxh_02_G01	CCTATCACAT	AGAGTTTCGTGACATGCGGT	ATAGTTACAACGGCTGCCCC
lxh_02_G02_1	CCGATTGATT	AGAGTTTCGTGACATGCGGT	ATAGTTACAACGGCTGCCCC
lxh_02_G02_2	CGTAATATGC	CCTTTAGGCCGCGATGACTT	ACTCTAGTCCGTGGCCACTA
lxh_02_G03	CGATTACACT	AGAGTTTCGTGACATGCGGT	ATAGTTACAACGGCTGCCCC
lxh_02_G04_1	GTTCTGGTAA	AGAGTTTCGTGACATGCGGT	ATAGTTACAACGGCTGCCCC
lxh_02_G04_2	GTAAGCGTAT	AGTCAGATTGCCGCCTTTGA	GAGTTCCCCAATCGTTCCCC
lxh_02_G05	GTCGATATGA	ATGCGAGCGGTATGAGGTAC	AGTGACTCAAACTGCTTTCGC
lxh_02_G06	GTGTCTTGTA	TGCACTCCTTCCAAGATATGC	AGGGAGATGTGGCAAATACGA
lxh_02_G07	GTGACAATCA	ACTGCACAGCCTTCGATTGA	GTGAGCACTACGAATCGAC
lxh_02_G08	GAACCTTACT	ACTGCACAGCCTTCGATTGA	GTGAGCACTACGAATCGAC
lxh_02_G09	GAAGACAGAT	AGCTACCATCAAATGAACGT	AATGGGTGACGAGGAGCAAG
lxh_02_G11	GCTCACAATA	AGCTACCATCAAATGAACGT	AATGGGTGACGAGGAGCAAG
lxh_02_G12	GCTGCATTAA	GCCGTATAGCATTTTCCTCT	AGCAACACGGAGAAGGTATCC
lxh_02_H01	TCTAACAGCG	GCACACAAGGGCAGTCACTT	CCATTGCTCTGTCTCTGCGA
lxh_02_H02	TCACTTGCCT	AGCCAACTGTCACAACACTG	CAGTCTTCAGTCGGTCCATCC
lxh_02_H03_1	TCACGGCTAT	ACAGTTGACGCACTCACTCT	CTTGTGTGGGGCGATGTAGA
lxh_02_H03_2	TCAGGACAGA	GCCGCTGCCTATTATAAGTCG	CTTGTGCGAGGCCATGTAGA
lxh_02_H04_1	TCCTCACCTA	ACAGTTGACGCACTCACTCT	CTTGTGTGGGGCGATGTAGA
lxh_02_H04_2	TCCAAGGACA	GCCGCTGCCTATTATAAGTCG	CTTGTGCGAGGCCATGTAGA
lxh_02_H05	TCCGTTGGAA	AGCACAGTGACAGCAGACAG	CCCTAATGTGGCCAATATCAGT
lxh_02_H06	TCCGATTAGG	AGCACAGTGACAGCAGACAG	CCCTAATGTGGCCAATATCAGT
lxh_02_H07_1	TCGCAGAGAA	GCAAGATCCTCTCAGTAACACA	TGTGATGTCTGTGGGTTATGGT
lxh_02_H07_2	TGTGAGTTCG	TCGCCCAACCTGTGAGAAAA	ACTCGAAATTGTCTTCACTGGG
lxh_02_H07_3	TGATGCAGGT	TTGTTCCGTTCGTGGGGTC	GACAGTAAACACAGGCCGGA
lxh_02_H08_1	TGCTTCTCTC	CAGTACATGTGGGTGATGCC	GGAACGTTCTCAATTTCGCGT
lxh_02_H08_2	TGCTAACTGG	TCTAGGAGCAGGTGTAGGGAC	ATCGGTGGGTTGCACTTCTT
lxh_02_H08_3	ATTCCGGATC	TGGGATTGTTGGTTGTTCAGT	CGGATGGCCTGACTCGTAGA
lxh_02_H08_4	ATCCGTGACA	TTGTTCCGTTCGTGGGGTC	GACAGTAAACACAGGCCGGA
lxh_02_H09_1	ATGTACAGCC	CAGTACATGTGGGTGATGCC	GGAACGTTCTCAATTTCGCGT
lxh_02_H09_2	ATGTGTCCTC	TCTAGGAGCAGGTGTAGGGAC	ATCGGTGGGTTGCACTTCTT
lxh_02_H09_3	AACACTCCGT	TGGGATTGTTGGTTGTTCAGT	CGGATGGCCTGACTCGTAGA
lxh_02_H09_4	AAGAGACGAC	TTGTTCCGTTCGTGGGGTC	GACAGTAAACACAGGCCGGA
lxh_02_H10_1	AAGCAAGTCG	CAGTACATGTGGGTGATGCC	GGAACGTTCTCAATTTCGCGT
lxh_02_H10_2	ACTTCCGGTA	TCTAGGAGCAGGTGTAGGGAC	ATCGGTGGGTTGCACTTCTT
lxh_02_H10_3	ACTAGTGCTG	TGGGATTGTTGGTTGTTCAGT	CGGATGGCCTGACTCGTAGA
lxh_02_H10_4	ACTCTACGCA	TTGTTCCGTTCGTGGGGTC	GACAGTAAACACAGGCCGGA
lxh_03_A01	TTCTCATACC	CTAAAACGGTTCGCGCGC	TCTTTATCGTGGCGTGCTGT
lxh_03_A02	TTCCACTGAT	CTAAAACGGTTCGCGCGC	TCTTTATCGTGGCGTGCTGT
lxh_03_A03	TTCCGATTGA	GATTCCGATGTTGAAGCAAAA	TGAGTACGCCATGCCTCCTA
lxh_03_A04	TTCGTTCTTC	GATTCCGATGTTGAAGCAAAA	TGAGTACGCCATGCCTCCTA
lxh_03_A05	TTCGCAACAT	CTACAGCTAGACACCGCGC	AGTTTAAGACGTCCCTGGCTG
lxh_03_A06	TTGTGTGGAT	CTACAGCTAGACACCGCGC	AGTTTAAGACGTCCCTGGCTG
lxh_03_A07_1	TTGAACCACT	CAGTACATGTGGGTGATGCC	GGAACGTTCTCAATTTCGCGT
lxh_03_A07_2	TTGCTTATCG	TGCAGCCACAGGTCACCT	CGCCGGTAACCACTCACTAT
lxh_03_A07_3	TTGCTGTCTT	TGCAGTACCATAACGCATCTGA	TCCCACAAATTGCGCATGTT
lxh_03_A07_4	TTGCAACTAC	TGGCAGAAATAAAGAGGGTGGT	TCCTTGCTTCAGAAAACGTT
lxh_03_A07_5	TATTATGCCG	TGGGATTGTTGGTTGTTCAGT	CGGATGGCCTGACTCGTAGA
lxh_03_A07_6	TATTACTGGC	TTGTTCCGTTCGTGGGGTC	GACAGTAAACACAGGCCGGA
lxh_03_A08_1	TATTCACGAG	CAGTACATGTGGGTGATGCC	GGAACGTTCTCAATTTCGCGT
lxh_03_A08_2	TATTCGACTC	TGCAGCCACAGGTCACCT	CGCCGGTAACCACTCACTAT
lxh_03_A08_3	TATTGCCTCT	TGCAGTACCATAACGCATCTGA	TCCCACAAATTGCGCATGTT
lxh_03_A08_4	TATATCCAGG	TGGCAGAAATAAAGAGGGTGGT	TCCTTGCTTCAGAAAACGTT
lxh_03_A08_5	TATACAGTCC	TGGGATTGTTGGTTGTTCAGT	CGGATGGCCTGACTCGTAGA
lxh_03_A08_6	TATAGCGGAA	TTGTTCCGTTCGTGGGGTC	GACAGTAAACACAGGCCGGA
lxh_03_A09_1	TATCTTCCAC	CCGCGACTGGAAAGGTAAGT	TTACCGGCCACATCGCAC
lxh_03_A09_2	TATCTGAGCT	TTGTTCCGTTCGTGGGGTC	GACAGTAAACACAGGCCGGA
lxh_03_A10_1	TTATTCTGCG	CGTCAGTAGCACCGACTCAT	CCCCTGGAAGCTGTGAGTTT
lxh_03_A10_2	TTATAGGTCC	TTGATCTTCTCCGCAGCTGG	ACGTCATATTGCAGAGCGGA
lxh_03_A11_1	TTATCTGAGG	ACCCAGATGTAGTTGTCTAGA	ATGGCAGAGTCAAGGTAAATT
lxh_03_A11_2	TTATCGCGTT	CGACCCAGATGTAGTTGTCTAGA	GGCAGAGTCAAGGTAAATTATTTT
lxh_03_A11_3	TTATGCGCTA	TGACAGTGAAGCAGCTCAGA	TGACCGTCATTTAGCGACCG
lxh_03_A11_4	TTAATGGCAG	ACCTTTTGTCATTGTTTTGTGAGT	TACAAGAGCTGCACACTGGG
lxh_03_A11_5	TTAACTAGCC	TTGATCTTCTCCGCAGCTGG	ACGTCATATTGCAGAGCGGA
lxh_03_A12_1	TTAAGACTCG	ACCCAGATGTAGTTGTCTAGA	ATGGCAGAGTCAAGGTAAATT
lxh_03_A12_2	TTACTGCACA	CGACCCAGATGTAGTTGTCTAGA	GGCAGAGTCAAGGTAAATTATTTT
lxh_03_A12_3	TTACATCCTG	ACCTTTTGTCATTGTTTTGTGAGT	TACAAGAGCTGCACACTGGG
lxh_03_A12_4	TTACACAAGC	TTGATCTTCTCCGCAGCTGG	ACGTCATATTGCAGAGCGGA
lxh_03_A12_5	TTACCAGGAA	TTGTTCCGTTCGTGGGGTC	AAACACAGGCCGGACAGTAG
lxh_03_B01	TAACGTAGAG	TTGAACGTTGAGGATGGCGA	CATCACGACGTCAATGGCAC
lxh_03_B02	TACTAGCCAT	CGTACAATATGGCGGGAGTGA	TCACTTGACCGAGTACTTCTGT
lxh_03_B03	TACTCCAAGA	CACCTATTGTCACTGCTGTCT	GCCTACATCACCGCTCACTT
lxh_03_B04	TACAACGTTG	ACATCCGAATAACAGCTTTCT	CGTGTCACAATTTCGCTCCA
lxh_03_B05	TAGAACACAC	TCCAGGCGATCAGTAACAGA	ATAGCATCGCCAAGACCCTC
lxh_03_B06	TAGACAAGGT	ATGTACTCACTTCAGGGGAA	TGGTTAGATGTGTTGGAAAGT
lxh_03_B07	TCTTAGCATG	ATGTACTCACTTCAGGGGAA	TGGTTAGATGTGTTGGAAAGT
lxh_03_B08	TCTTCTTGCT	GGGAGACGACACAAGGATGG	CGGAGGTGGAAGAATCTATGAC
lxh_03_B09	TCTTGAATGC	TGCACTTTAATTCTTCAGGGTCA	TCACGGATCCAAATGAATAAAGA
lxh_03_B10_1	TATCAGCTGA	CCATTTTGGCCGGACAATCG	AGTGCTGATGTGATTGTTTCA
lxh_03_B10_2	TATCGTGAGT	TCTTCAGGGTCATTTCGTGGT	TCACGGATCCAAATGAATAAAGAA
lxh_03_B12	TATCGATCTG	TCGCGCTACTATTGTTGGCA	TGCTGAAGACCGGACCTCTA
lxh_03_C01	TCCGTATTCT	CACCTATTGTCACTGCTGTCT	GCCTACATCACCGCTCACTT
lxh_03_C02	TGTTGAGACA	GAACCACGGCCAGATCATGT	TCAGCATTGGGTAGACACGG
lxh_03_C03	TGTAGTACCT	TGGCTTCCTTAACACCACAA	TGCTCCTGATTCTTGCAACT
lxh_03_C04	TGTCAAGCAT	TGGCTTCCTTAACACCACAA	TGCTCCTGATTCTTGCAACT
lxh_03_C05	TGTCCTAATG	ACTTCAGAACACAGAAACGT	CGCAAAAGGAAGGAAGAGGC
lxh_03_C06_1	TGTGTCATGA	AGGGTCCCGATTTCCTCCAA	TCGCCATCCTCAACGTTCAA
lxh_03_C06_2	TGTGGCTAAT	GCGATAATTCCGGCGGTTTG	AGGCAAAGCTCACAGTATCCT
lxh_03_C07	TGAAGGATTC	ACTGTAGCGACGAGTAATACCA	GGCGTACACCTCAAGAAATCA
lxh_03_C08	TGCACTGAAT	ACTGTAGCGACGAGTAATACCA	GGCGTACACCTCAAGAAATCA
lxh_03_C09	TGGATATACG	GAAATCGCAAAGGACTCCGC	AGCGGGACTGGATCTACTGT
lxh_03_C10	TCTTGGTCAA	GAAATCGCAAAGGACTCCGC	AGCGGGACTGGATCTACTGT
lxh_03_C11	TCTATAGCGA	CAAAACAGCGCATTATACGGC	GCTCACAATGGCGTCACTTG
lxh_03_D01	ATTGTAGCAC	ACCGTCATTAAAGTACTCAAACA	TTTAATGTTGCGTGTGTCTTAC
lxh_03_D02	ATATGGAACG	ACCGTCATTAAAGTACTCAAACA	TTTAATGTTGCGTGTGTCTTAC
lxh_03_D03	ATAAGAGAGC	TGAGCTCGTCCATCCACCTA	GGCACCGCGTATTATTACCG
lxh_03_D04	ATACGTACGT	TGTCAATGTTAGAGGTGTAGGCT	TGCTAAGTTTGAATTCTCACTGTC
lxh_03_D05	ATAGTCCGAA	CATACTGACGCGTTATTTCTGT	CTGCCGGGTCAGCTAGTAAG
lxh_03_D06	ATCTCTTCAG	GCGAACCAAGCTCCAAACTC	TCCATCGAACATCACGCTGA
lxh_03_D08	ATCAAGTTGG	GGATGGATACCGTTTTCAGACA	CACTGCACACCCAAGCTTTT
lxh_03_D09	ATCACCAGTT	GGACCGTGACGTTGTTCTGA	TACCACCTGCACCACCAGTA
lxh_03_D10	ATTATTCGGC	GGACCGTGACGTTGTTCTGA	TACCACCTGCACCACCAGTA
lxh_03_D11	ATTATCGTCG	TCAGCGGCCAAACAATCTCA	GCACTTTGAGTTTTCCTTGTGG
lxh_03_D12	ATTACAACGG	CATGGATGTCGTGGTAGAGCT	ACCTGCGATTTCTCAGCGTA
lxh_03_E01	AATGGCCATA	CATGGATGTCGTGGTAGAGCT	ACCTGCGATTTCTCAGCGTA
lxh_03_E02_1	AACGTGTGAT	ACGTTGTCACATTTACCCACCT	CCACTGGAGGAAAATGTGCG
lxh_03_E03	AACGAGACTA	ACGTTGTCACATTTACCCACCT	CCACTGGAGGAAAATGTGCG
lxh_03_E05	AAGTTATCGG	GGTTGTTGGTGTGGTGCTTG	CCTACAAAACTTTTCCCGCGT
lxh_03_E06	AAGTCTACCA	GGTTGTTGGTGTGGTGCTTG	CCTACAAAACTTTTCCCGCGT
lxh_03_E07	AAGTGCTGTT	TCGCCCAACCTGTGAGAAAA	ACTCGAAATTGTCTTCACTGGG
lxh_03_E08	AAGATGGTGT	TCGCCCAACCTGTGAGAAAA	ACTCGAAATTGTCTTCACTGGG
lxh_03_E09	AAGAAGTACC	TCGCCCAACCTGTGAGAAAA	ACTCGAAATTGTCTTCACTGGG
lxh_03_E10	ATCCAATCTC	TCCGAAGACAAATAGTAGGGGT	ATAATACCCGGTGCCTTCGC
lxh_03_E11	ATCGCAGTTA	TCCGAAGACAAATAGTAGGGGT	ATAATACCCGGTGCCTTCGC
lxh_03_E12_1	ATGTTGCTAG	AGGTGGCGTTGAAGTATGGT	ACAAGTGAAGGACGGCTGTT
lxh_03_F01	AGTAGACTGA	CCACCCTACTATCCGCCCTA	ACACCTGTCTCGTTGCACAT
lxh_03_F02	AGCTGATGAA	CCACCCTACTATCCGCCCTA	ACACCTGTCTCGTTGCACAT
lxh_03_F03	AGGTATGATG	GCCATACTGTAACCTGCCCC	TGCAGCACAGTATCGAACACA
lxh_03_F04	AGGTGAATCT	GCCATACTGTAACCTGCCCC	TGCAGCACAGTATCGAACACA
lxh_03_F05	AGGACATCTT	GCCATACTGTAACCTGCCCC	TGCAGCACAGTATCGAACACA
lxh_03_F06	CTTAACTCTG	TTCTCATCGAAAACGCCAGC	ACTACGATATGGATTGCAACGG
lxh_03_F07	CTTCATTACC	GGACACAATGAAGACAGAGACA	TGAGCTGTGAATTGAGGTGT
lxh_03_F08	CTTCCTACAA	GGACACAATGAAGACAGAGACA	TGAGCTGTGAATTGAGGTGT
lxh_03_F09	CTTGTTGAGA	TGGCCACATATGTTACATTTCTCT	TGAAAATCTTAACATTCCAGCAA
lxh_03_F10	AAGCCGTTAA	TGGCCACATATGTTACATTTCTCT	TGAAAATCTTAACATTCCAGCAA
lxh_03_F11	AAGGTCATTC	CCTTGGAGAAGTGGCCGG	GATCGAGGGTACGCTGTTGG
lxh_03_F12	ACTTATCCGA	TGTGCGCGAGATATAAACCGA	ACCCAACGCTACCTTTATGA
lxh_03_G01	CATGCGTATT	TGTGCGCGAGATATAAACCGA	ACCCAACGCTACCTTTATGA
lxh_03_G02	CCGATTGATT	TCGTCTTACTGTCCATGCGC	CGGAGTCAGCGGGATATAGC
lxh_03_G03	CGTAATATGC	TCGTCTTACTGTCCATGCGC	CGGAGTCAGCGGGATATAGC
lxh_03_G04	CGATTACACT	AAAATGTACTCCGTGGTTGT	AAACACACATTCGACGCTGC
lxh_03_G05	GTTCTGGTAA	AAAATGTACTCCGTGGTTGT	AAACACACATTCGACGCTGC
lxh_03_G06	GTAAGCGTAT	TGGTGCCGCTATACTTACCG	TTGTCGGCCTGCTCAAGTAG
lxh_03_G07	GTCGATATGA	CCATGACGTGTTAAGTGCGG	CGTGGGAAAGCAATTGGGTG
lxh_03_G08	GTGTCTTGTA	CCATGACGTGTTAAGTGCGG	CGTGGGAAAGCAATTGGGTG
lxh_03_G09	GTGACAATCA	CATGAGTGGAGCGACGTACT	TGGGTCATACAAGCGCGTTA
lxh_03_G10	CTTGACATCT	CATGAGTGGAGCGACGTACT	TGGGTCATACAAGCGCGTTA
lxh_03_G11	CTATGTCTGA	TGGTGCCGCTATACTTACCG	TTGTCGGCCTGCTCAAGTAG
lxh_03_G12	CTAAGGAGAA	TGGTGCCGCTATACTTACCG	TTGTCGGCCTGCTCAAGTAG
lxh_03_H01	TTGGAAGCCA	CGTAGTCCACAGGCATCACA	GTGTGGCAGGGCTGGTATAT
lxh_03_H02	TACGCCTTAC	CGTAGTCCACAGGCATCACA	GTGTGGCAGGGCTGGTATAT
lxh_03_H03	TAGTCTCTGC	GCTGCCGGACCGATTCTC	CGTATCGTGATGGTGGTGGT
lxh_03_H04	TAGTCGGACT	GCTGCCGGACCGATTCTC	CGTATCGTGATGGTGGTGGT
lxh_03_H05	TAGAGGCCTA	ACACACACTTAGTAACGTCAAC	GGTGCATCGCCTGTTAAACT
lxh_03_H06	TCTAACAGCG	CGCCGGATTAGGTCAGTCAA	AACCATGGCCGTTCGGTATT
lxh_03_H07	TCACTTGCCT	CGCCGGATTAGGTCAGTCAA	AACCATGGCCGTTCGGTATT
lxh_03_H08	TCACGGCTAT	GCGTGAACCTGTAAATACCTCA	ATCCGGTGCCACAGAGAGTA
lxh_03_H09	TCAGGACAGA	TGGTCGCCACTCCAATATGA	CAGCACATTGAACCCGAACG
lxh_03_H10	GAACTGATTG	CCTCGTGGTGCAAGAAGAGA	ATACGCATCCAGACCGCATT
lxh_03_H11_1	GAACCTTACT	AAGAGTGCAGGGATCCGGTA	AGTGTTGGACTCCCTAACTGG
lxh_03_H11_2	GAAGACAGAT	TTCAGATGACTTCGGGTTCCA	TGTAAGTTTTCATTGCCAAGATGC
lxh_03_H12	GCTCACAATA	GAAGCCAGAACTCTCGATAG	TTGGATGGGTAGATCGACTC
lxh_04_A01	TTAGAGTGGA	AGATATGGCCTCAGAAATACCT	GTGTCGCGGTCTTTCCTATT
lxh_04_A03	TTAGCCATTG	ACTGCACAGCCTTCGATTGA	GTGAGCACTACGAATCGAC
lxh_04_A04	TTAGGTTCAC	CACTAGAGGAACGGGACAGC	CCCAAGCTATCACCTCCTGC
lxh_04_A05	TTCTTCGTGT	CACTAGAGGAACGGGACAGC	CCCAAGCTATCACCTCCTGC
lxh_04_A06	TTCTTGAGAC	CCCACGTTCCATCTCCAAGA	CCGCACCCTATCGATCACTT
lxh_04_A07	TTCTATCGCA	TAGCCACCCCTACGACAGTT	TGTCCTATGTGCGTTCCCAA
lxh_04_A08	TTCATCACCA	AAAGTCTCGTGCTAAATTTGC	TCAGTTCTGAGGTTGGGCAG
lxh_04_A09	TTCACGCTAA	GCATGTGCGGTATTTGGGC	TCATGCTGTTTCTGTAGGCGT
lxh_04_A10	TTCAGTTGTG	TGGCCGAATATGTGACGAGG	ACCGTTCTGTCCTTCGTTCC
lxh_04_A11	TTCAGGAAGT	ACACGGCAAGAGACACGATT	TCATAGAGACGTCGCCATTAC
lxh_04_A12	TTCCTAGATG	ACACGGCAAGAGACACGATT	TCATAGAGACGTCGCCATTAC
lxh_04_B01	TATGTCGCTT	GCAGTGCTCCGTGAAAATTT	TGCTTGGCTTGAAAGAGTCGA
lxh_04_B02	TATGAGGAAC	GCAGTGCTCCGTGAAAATTT	TGCTTGGCTTGAAAGAGTCGA
lxh_04_B03	TATGCTTCGA	GAAGCCAGAACTCTCGATAG	TTGGATGGGTAGATCGACTC
lxh_04_B04	TAATGGTTGG	GAAGCCAGAACTCTCGATAG	TTGGATGGGTAGATCGACTC
lxh_04_B05	TAACACTCCA	GAAGCCAGAACTCTCGATAG	TTGGATGGGTAGATCGACTC
lxh_04_B06	TAACCACATC	GAAGCCAGAACTCTCGATAG	TTGGATGGGTAGATCGACTC
lxh_04_B08	TAAGTTCGGT	ATCCGCGGACAGTTCTAACC	AGTTTCCGGCCATGATGAGC
lxh_04_B11	TAAGTAACCG	GCAAGATCCTCTCAGTAACACA	TGTGATGTCTGTGGGTTATGGT
lxh_04_B12	TAAGGTGTCA	GCAAGATCCTCTCAGTAACACA	TGTGATGTCTGTGGGTTATGGT
lxh_04_C01	TCTACCTATC	CCCACGTTCCATCTCCAAGA	CCGCACCCTATCGATCACTT
lxh_04_C02_1	TCTAGACGTT	CATGCGGTGGTACTAGGTTCA	GTGCCTATCGTTGATCACTCT
lxh_04_C03	TCTCATGTTC	CATGCGGTGGTACTAGGTTCA	GTGCCTATCGTTGATCACTCT
lxh_04_C04	TCTGTTAACC	TTTACTCGCCTGTCCACACG	GGGTAAACTGAGCGGTGACA
lxh_04_C05	TCATTCGAAC	TGCGTGAGGGTTTTCAGTAGA	ACTTTGTTCTTTTGTGGGCT
lxh_04_C06	TCACCTATGA	TGCGTGAGGGTTTTCAGTAGA	ACTTTGTTCTTTTGTGGGCT
lxh_04_C07	TCAGAAGTAG	TGCGGTCTTGTTGAACCTCA	CACGAGGAAGAGGAACCGAG
lxh_04_C08	TCGTTAAGTG	TGCGGTCTTGTTGAACCTCA	CACGAGGAAGAGGAACCGAG
lxh_04_C10_1	TCGTCCATAT	GCCAAACGCTTTCTGTATTTCTG	CGTGCGGACTTACAAGAGGT
lxh_04_C11	TCGCGTTATA	CGCCTCCGTCGAATGTGATA	GCAAAACAAGAGCGTCCACA
lxh_04_C12	TCGGATACTT	CGCCTCCGTCGAATGTGATA	GCAAAACAAGAGCGTCCACA
lxh_04_D02_1	ATTACGTGCA	ACAGTTGACGCACTCACTCT	CTTGTGTGGGGCGATGTAGA
lxh_04_D02_2	ATTAGGCCAT	GCCGCTGCCTATTATAAGTCG	CTTGTGCGAGGCCATGTAGA
lxh_04_D04	ATTCTCTCGA	TCCTAACGCAAACACAATTTG	CGACCGGTTTAGTTGCTAATG
lxh_04_D05	ATTCATGGAG	ACCAGGTCACAAAATCCCTT	GCATGATAAGGTGCCGCAAG
lxh_04_D06	ATTCCTCTCT	GGTGAACGCAATACTGGAACG	CGAGGTCTAGCGCGTTCATA
lxh_04_D07	ATTCGCATAC	GGTGAACGCAATACTGGAACG	CGAGGTCTAGCGCGTTCATA
lxh_04_D08	ATTGTGAGTG	AGCCGTAGAAGATGTGCAGA	CGATTCGCGCTTCATTTGTG
lxh_04_D09	ATTGAACACG	ACTGTAGTCGGCGGTATC	TGGTGGAGAACGCACAACTA
lxh_04_D10	ATTGGATGGT	ACTGTAGTCGGCGGTATC	TGGTGGAGAACGCACAACTA
lxh_04_D11	ATATCAGCCT	ACACCAAGACACTTAAGACCCA	TGACACATTTACTGGCAATACA
lxh_04_E01_1	ATGACTGTAC	AGCTCATTTGTTTACATGTCGA	ACCTTGACACTAAAATGCAACA
lxh_04_E01_2	ATGCTCGAAT	GGCTTGCAACTGGTATGTCC	GCGTTCGGGGTATGAGTGAA
lxh_04_E02	ATGCGAAGTA	TCAACTCCAAAACACGTTCACT	TACAACTCTCGCAACAGCCA
lxh_04_E03	AATTCCTACG	TCAAACACCGGCATAGTCCC	CGAAATGTATCCCGGGCAGA
lxh_04_E04	AATTGGAGGA	TCAAACACCGGCATAGTCCC	CGAAATGTATCCCGGGCAGA
lxh_04_E05	AATACGCTTG	TCAAACACCGGCATAGTCCC	CGAAATGTATCCCGGGCAGA
lxh_04_E07	AATGCTAGAC	GAGGTCCTCAAATAGAATGCT	GCCACTGACTGTAGAGCGTT
lxh_04_E08	AACTTACTCC	ACGTTGTCACATTTACCCACCT	CCACTGGAGGAAAATGTGCG
lxh_04_E09_1	AACTTCGCAA	ACGTTGTCACATTTACCCACCT	CCACTGGAGGAAAATGTGCG
lxh_04_E09_2	AACATTAGCG	GAAGCCAGAACTCTCGATAG	TTGGATGGGTAGATCGACTC
lxh_04_E10	AACAGCTTCA	CCTCGTGGTGCAAGAAGAGA	ATACGCATCCAGACCGCATT
lxh_04_E11	AACCATTGGA	CCTCGTGGTGCAAGAAGAGA	ATACGCATCCAGACCGCATT
lxh_04_E12	AACCACAACT	AAGCGGACGTGGATGACATT	ACGTTTCTCACCATTTTGTTCT
lxh_04_F01_1	ACTAACGAGT	AAGCGGACGTGGATGACATT	ACGTTTCTCACCATTTTGTTCT
lxh_04_F02_1	ACATTGTGTC	ATCCGCCTCCACAGTCAATG	CCGCACTTAACACGTCATGG
lxh_04_F02_2	ACAACGATCT	CCATGACGTGTTAAGTGCGG	CGTGGGAAAGCAATTGGGTG
lxh_04_F02_3	ACACAAGGTT	TGAGCTCGTCCATCCACCTA	GGCACCGCGTATTATTACCG
lxh_04_F03_1	ACAGATAGCA	CCGGCGTACATTCATTGAGG	GCATCGCGGAATTTATTGTGGA
lxh_04_F03_2	ACAGGTGAAT	CGTCGAAAGTCTCTATGAAGCC	GCTAAAGAAGGGGCTGATGT
lxh_04_F03_3	ACCTTCCATT	TTTAAGTGGTAGGTAGGACAAC	TCGAATGATGACGTAGGCCC
lxh_04_F04	ACCTATGTCT	GGTTGTTGGTGTGGTGCTTG	CCTACAAAACTTTTCCCGCGT
lxh_04_F05	AGTTAACGTC	TGCTGTTCGTTAGTCTCGCT	TGACCCGGCAGACTTCCTAG
lxh_04_F06	AGTTACACAG	TGCTGTTCGTTAGTCTCGCT	TGACCCGGCAGACTTCCTAG
lxh_04_F07	AGTTGTTAGC	TTTAAGTGGTAGGTAGGACAAC	TCGAATGATGACGTAGGCCC
lxh_04_F08	AGATACCTCA	CGTTTCCCGCTATTGTTTGTCT	TTGGAGGCTGCCGAATCATC
lxh_04_F09	AGAATCAACC	TTGTGACATCCCAGGTTTGT	CCAGCTGCGACCGAACTC
lxh_04_F10	AGAACTCGTA	TTGTGACATCCCAGGTTTGT	CCAGCTGCGACCGAACTC
lxh_04_F11_1	AGACTTCAAG	TCCATGCCGATTTCCTCCTG	TTCTCAGCCGTGTTCATATGG
lxh_04_F11_2	AGACTATTGC	TCAGTTATCCAAGCGCGTCT	TGACTCGTGTGGCTCAGAAC
lxh_04_F12	AGCTCTATTC	TCAGTTATCCAAGCGCGTCT	TGACTCGTGTGGCTCAGAAC
lxh_04_G01	CTAGTCTATC	TCAGTTATCCAAGCGCGTCT	TGACTCGTGTGGCTCAGAAC
lxh_04_G02	CTAGAGCAAT	GCACCAGAAGCAGCTCCATA	GGTAACGAGTCCATTGTAGAGG
lxh_04_G03	CTCTGAATTG	TGGGACTCAATGAAACAATGA	AATGTCATCCACGTCCGCTT
lxh_04_G04	CTCATACCTT	CCGGTCCTTCAAAGAGCTCA	GCCCATCGTTGCAGTTTGAA
lxh_04_G05	CTGTAATGAG	CCGGTCCTTCAAAGAGCTCA	GCCCATCGTTGCAGTTTGAA
lxh_04_G06_1	CTGAAGGTTA	ATCCGCCTCCACAGTCAATG	CCGCACTTAACACGTCATGG
lxh_04_G06_2	CATATAGGTG	CCCACGTTCCATCTCCAAGA	CCGCACCCTATCGATCACTT
lxh_04_G06_3	CATAATCGCT	TGAGCTCGTCCATCCACCTA	GGCACCGCGTATTATTACCG
lxh_04_G06_4	AGACGCGTTG	TGAGCTCGTCCATCCACCTA	GGCACCGCGTATTATTACCG
lxh_04_G07_1	CATAGGTTAC	ATCCGCCTCCACAGTCAATG	CCGCACTTAACACGTCATGG
lxh_04_G07_2	CATCGAATCA	CCCACGTTCCATCTCCAAGA	CCGCACCCTATCGATCACTT
lxh_04_G07_3	CATGAACCAA	TGAGCTCGTCCATCCACCTA	GGCACCGCGTATTATTACCG
lxh_04_G08_1	CAATTGACGT	ATCCGCCTCCACAGTCAATG	CCGCACTTAACACGTCATGG
lxh_04_G08_2	CAATATGGAC	CCCACGTTCCATCTCCAAGA	CCGCACCCTATCGATCACTT
lxh_04_G08_3	CAATCATGCA	TGAGCTCGTCCATCCACCTA	GGCACCGCGTATTATTACCG
lxh_04_G09	CAACAAGAGA	CGACCCACTGAGAAGATCCG	TCGTCAGGCACATTTAGAGA
lxh_04_G10_1	CACTCAGTAT	CGACCCACTGAGAAGATCCG	TCGTCAGGCACATTTAGAGA
lxh_04_G10_2	CAGATCCTAA	TCAGTTATCCAAGCGCGTCT	TGACTCGTGTGGCTCAGAAC
lxh_04_G11	CAGGAATTGT	CAACCTTGGCGATCTCCTGA	CGCGTGGCATTAGATAAGACG
lxh_04_G12	CCTATCACAT	CAACCTTGGCGATCTCCTGA	CGCGTGGCATTAGATAAGACG
lxh_04_H01_1	GCTGCATTAA	AGGGTCCCGATTTCCTCCAA	TCGCCATCCTCAACGTTCAA
lxh_04_H01_2	GCATGTTCTT	CGAGTCCTCATATCTCACGTGT	CCGTGGACTGGGCTTTACTC
lxh_04_H02_1	GCCTTATAGA	AGGGTCCCGATTTCCTCCAA	TCGCCATCCTCAACGTTCAA
lxh_04_H02_2	GCGTATCAAT	CGAGTCCTCATATCTCACGTGT	CCGTGGACTGGGCTTTACTC
lxh_04_H03	GGTATTCACA	GTATCGGAGTTGACCAGGGT	CCCCAATCTACTGTATCCAAAA
lxh_04_H04	GGTATCTGTT	GTCTTCCGGTGTGATCGTGA	CACCACAAAGTCCACTCCGA
lxh_04_H05_1	TTCTGCCAAG	GGTGAACGCAATACTGGAACG	CGAGGTCTAGCGCGTTCATA
lxh_04_H05_2	TTCAATGCGC	TCGCCCAACCTGTGAGAAAA	ACTCGAAATTGTCTTCACTGGG
lxh_04_H06	TTGTAGACGG	GGGCCAGAACATCCACAACT	TACGCCGTCATGTTCCTGAT
lxh_04_H07	TTGATCGGTC	GGGCCAGAACATCCACAACT	TACGCCGTCATGTTCCTGAT
lxh_04_H08	TTGGCGTAAG	TCTCGGCAAAGACACATCCA	GGTACTGGTGACGACGTGAG
lxh_04_H09	TACTGAGGTC	TCTCGGCAAAGACACATCCA	GGTACTGGTGACGACGTGAG
lxh_04_H10	TACAGTCACC	CCTGCTCCATATCCTGCTCC	GTGCAGGAACAGGCTCTTCT
lxh_04_H11	TACCTCCGTA	AGGGTCCCGATTTCCTCCAA	TCGCCATCCTCAACGTTCAA
lxh_05_A04_1	TTATCTGAGG	AGCACCTGAACCAGCACC	GGTGCAGGAACAGGCTCTT
lxh_05_A04_2	TTATCGCGTT	TGGCTTCCTTAACACCACAA	TGCTCCTGATTCTTGCAACT
lxh_05_A07	TTATGCGCTA	AGGGTCCCGATTTCCTCCAA	TCGCCATCCTCAACGTTCAA
lxh_05_A08	TTAATGGCAG	AGGGTCCCGATTTCCTCCAA	TCGCCATCCTCAACGTTCAA
lxh_05_A09	TTAACTAGCC	TGAACGAGCTCAGCGAGAC	CTGCTTCACTTTGTCGTCGC
lxh_05_A10	TCCTCACCTA	TACCTCGGAAAAGCTGGCTG	AAAGATCACCTGCCCGAGTC
lxh_05_A11	TCCAAGGACA	GACCCCGAAATCCCCTGTAT	CTCCAGCCCGTAACAGTACTT
lxh_05_A12_1	TCCGTTGGAA	CCACCCTACTATCCGCCCTA	ACACCTGTCTCGTTGCACAT
lxh_05_A12_2	TCCGATTAGG	GCCGGATCAGCTAGTTGTGT	CTACAACGTAAATGCCGCCC
lxh_05_A12_3	TCGCAGAGAA	GACCCCGAAATCCCCTGTAT	CTCCAGCCCGTAACAGTACTT
lxh_05_B01	TTCTATCGCA	CGTACAATATGGCGGGAGTGA	TCACTTGACCGAGTACTTCTGT
lxh_05_B02	TTCAGTTGTG	CGTACAATATGGCGGGAGTGA	TCACTTGACCGAGTACTTCTGT
lxh_05_B03	TTCAGGAAGT	TGAACGAGCTCAGCGAGAC	CTGCTTCACTTTGTCGTCGC
lxh_05_B04	TTCCTAGATG	AGTGAACTAAAGGAAGCAGGT	ACTGAAAAGACTGCTGCTGT
lxh_05_B05	TTCCACTGAT	AGTGAACTAAAGGAAGCAGGT	ACTGAAAAGACTGCTGCTGT
lxh_05_B06_1	TTCCGATTGA	ACACGGCAAGAGACACGATT	TCATAGAGACGTCGCCATTAC
lxh_05_B06_2	TTCGTTCTTC	TCAAACACCGGCATAGTCCC	CGAAATGTATCCCGGGCAGA
lxh_05_B07	TTCGCAACAT	TCAAACACCGGCATAGTCCC	CGAAATGTATCCCGGGCAGA
lxh_05_B09	TTGAACCACT	TGAATACACCGCGTTCCCTG	TGTTTCCTGTCACCTCTGCG
lxh_05_B10	TTAACCTCGT	TGAATACACCGCGTTCCCTG	TGTTTCCTGTCACCTCTGCG
lxh_05_B11	TTAAGACTCG	GGACAGTCAGTTCTAGTCAGT	CGTTTAGGGCCGAGGTAAC
lxh_05_B12	TTACTGCACA	GGACAGTCAGTTCTAGTCAGT	CGTTTAGGGCCGAGGTAAC
lxh_05_C01	TATTACTGGC	AGGGTCCCGATTTCCTCCAA	TCGCCATCCTCAACGTTCAA
lxh_05_C02_1	TATACAGTCC	AAAGTCTCGTGCTAAATTTGC	TCAGTTCTGAGGTTGGGCAG
lxh_05_C02_2	TATAGCGGAA	ACTGTAGCGACGAGTAATACCA	GGCGTACACCTCAAGAAATCA
lxh_05_C02_3	TATCTTCCAC	AGTGAACTAAAGGAAGCAGGT	ACTGAAAAGACTGCTGCTGT
lxh_05_C02_4	TATCTGAGCT	CCACGGACCCAACTACCTG	ACCATTTTGTGCCGTGAAGC
lxh_05_C04	TATCAGCTGA	TGCTGCAAAACCTCACCGTA	GGATTTCTTACCACTGTACACA
lxh_05_C05_1	TATCGTGAGT	GCCGCGCAATTTTCACCTAT	CGTATTGGCAATTCACGTCAGT
lxh_05_C05_2	TATCGATCTG	TGCCACTGAGTCGCATTATG	TCGACAAAGCTCACAGTAAACT
lxh_05_C06	TATGTCGCTT	AGGGTCCCGATTTCCTCCAA	TCGCCATCCTCAACGTTCAA
lxh_05_C07	TATGAGGAAC	ACTGCACAGCCTTCGATTGA	GTGAGCACTACGAATCGAC
lxh_05_C08_1	TATGCTTCGA	GCTGGCTAAGATTGCATCCC	CGAGCGCTAATTGTGTACGA
lxh_05_C08_2	TAATGGTTGG	GTAGCCGTTGTTGGAGGTCA	TCGTGGCTCATGTGGTTAGT
lxh_05_C09	TAACACTCCA	GTAGCCGTTGTTGGAGGTCA	TCGTGGCTCATGTGGTTAGT
lxh_05_C10	TTGCTTATCG	TCAGTTATCCAAGCGCGTCT	ATGATGACTCGTGTGGCTCA
lxh_05_C11	TTGCTGTCTT	TCAGTTATCCAAGCGCGTCT	ATGATGACTCGTGTGGCTCA
lxh_05_C12	TTGCAACTAC	TCGGACACCAGAGACGAAGA	CATGACGAATCTGATCCGGC
lxh_05_D01_1	TCTTAGCATG	TCGGACACCAGAGACGAAGA	CATGACGAATCTGATCCGGC
lxh_05_D01_2	TCTTCTTGCT	TTCTCTTTGCCGTCGTCTCG	GCAACGCATGAAGACTCCAC
lxh_05_D02_1	TCTAGACGTT	CGCCTCTTCGTCACTTTCGT	CGACGTCAATAGCCATCCGA
lxh_05_D02_2	TCTCTCTTAG	CGCCTCTTCGTCACTTTCGT	CGACGTCAATAGCCATCCGA
lxh_05_D05	TCTGTTAACC	TGAGCAACAGTACCATCGGA	TGATGTCACTGTCCAAAGTAGT
lxh_05_D06	TCATTCGAAC	ACCAACCTTGTAGAGCTTCGA	ACTTCGAGCAGCCTGTCTTC
lxh_05_D07	TCACCTATGA	ACCAACCTTGTAGAGCTTCGA	ACTTCGAGCAGCCTGTCTTC
lxh_05_D08	TCAGAAGTAG	TCACGAGACAGTAATAGCCCT	AGATTCGTAACAGGAGCCAA
lxh_05_D09	TCCGTATTCT	TCACGAGACAGTAATAGCCCT	AGATTCGTAACAGGAGCCAA
lxh_05_D10	TAACCACATC	TGGAAATAAGAAAGACAACCGT	TATAGCGGCTGTCCCACTCT
lxh_05_D11	TAACGTAGAG	TGCAGTACCATAACGCATCTGA	TCCCACAAATTGCGCATGTT
lxh_05_D12_1	TAAGTTCGGT	CGCCTCCGTCGAATGTGATA	GCAAAACAAGAGCGTCCACA
lxh_05_D12_2	TAAGTAACCG	TGCAGTACCATAACGCATCTGA	TCCCACAAATTGCGCATGTT
lxh_05_E01_1	TGAAGGATTC	TGATAAGATGCTCTCACCGCT	GAAGCAGAACTAAACAGAAGCT
lxh_05_E01_2	TGCACTGAAT	TGATAAGATGCTCTCACCGCT	GAAGCAGAACTAAACAGAAGCT
lxh_05_E02_1	ATTAGGCCAT	CGACAACTCCAGCGGAATCT	CGTTGTCACTCAGATTGCCG
lxh_05_E02_2	ATTCTCTCGA	CGTCAGTAGCACCGACTCAT	CCCCTGGAAGCTGTGAGTTT
lxh_05_E02_3	ATTCATGGAG	GTATGGGTGGGACGGATCTC	GTTTCATTTCTGGACGTTCAA
lxh_05_E03	ATTCCTCTCT	CGACAACTCCAGCGGAATCT	CGTTGTCACTCAGATTGCCG
lxh_05_E04	ATTCGCATAC	GTATGGGTGGGACGGATCTC	GTTTCATTTCTGGACGTTCAA
lxh_05_E06_1	ATTGTAGCAC	ACGTCTGTGATTGATCCAGCT	AGTTTAGGAGTCCATCGCGG
lxh_05_E06_2	ATTGTGAGTG	ACTCACCTCAACGTCGTCAG	CCACTACCTTGCTGCTCCAT
lxh_05_E06_3	ATTGAACACG	CACCTATTGTCACTGCTGTCT	GCCTACATCACCGCTCACTT
lxh_05_E07	ATTGGATGGT	ACTCACCTCAACGTCGTCAG	TCGCTGATGATGTTGCCACT
lxh_05_E08	ATATCAGCCT	ACTCACCTCAACGTCGTCAG	TCGCTGATGATGTTGCCACT
lxh_05_E09_1	ATATGGAACG	AGAGTTTCGTGACATGCGGT	TGCACCACCCACCTTGAAAT
lxh_05_E09_2	ATAAGAGAGC	CTCGACTCGTCCAAGCACTC	GGAAGAGCAGCGCCAGTAAT
lxh_05_E10	TCGTTAAGTG	TCTGTTATCGCGCTGACTCG	ATGCTCGTTGTAGTTGCGGT
lxh_05_E11	TCGTCCATAT	GTGTTCTGTCATTGTCAAACCA	GCCGTACCTTTCTCCAACAT
lxh_05_E12	TCGAACTTGA	GTGTTCTGTCATTGTCAAACCA	GCCGTACCTTTCTCCAACAT
lxh_05_F01_1	AATGCTAGAC	ACGTTGTCACATTTACCCACCT	CCACTGGAGGAAAATGTGCG
lxh_05_F01_2	AATGGCCATA	ACGTTGTCACATTTACCCACCT	CCACTGGAGGAAAATGTGCG
lxh_05_F02	AACTTACTCC	GAATGAGGCTTTTGGACGGC	CGGAAATGGCTGAAAATGTTGA
lxh_05_F03	AACTTCGCAA	GAATGAGGCTTTTGGACGGC	CGGAAATGGCTGAAAATGTTGA
lxh_05_F04	AACATTAGCG	TGTGTTTGACCGCTTACCCA	CGAAGCCGCGTACAATCGT
lxh_05_F06_1	AACAGCTTCA	CGTCAGTAGCACCGACTCAT	CCCCTGGAAGCTGTGAGTTT
lxh_05_F06_2	AACCATTGGA	GACCAAAAGTTGCAAGTGTCCA	AGCCTCTTCACTGTGTTGTT
lxh_05_F06_3	AACCACAACT	TGGGATTGTTGGTTGTTCAGT	CGGATGGCCTGACTCGTAGA
lxh_05_F06_4	AACGTGTGAT	TTGTTCCGTTCGTGGGGTC	GACAGTAAACACAGGCCGGA
lxh_05_F07	AACGATCTAG	CGTCAGTAGCACCGACTCAT	CCCCTGGAAGCTGTGAGTTT
lxh_05_F08	AACGAGACTA	GACAGTGAAGCAGCTCAGACT	TGACCGTCATTTAGCGACCG
lxh_05_F09_1	AAGTTATCGG	GCTGGCTAAGATTGCATCCC	CGAGCGCTAATTGTGTACGA
lxh_05_F09_2	AAGTCTACCA	TGGAACACTTGAGCAACCGG	GATGGATCAAACTGCACACGG
lxh_05_F10	ATACGTACGT	AAACTTACGCATTGGACACG	TACCATGCACTCCACGCTTT
lxh_05_F11	ATAGTCCGAA	AAACTTACGCATTGGACACG	TACCATGCACTCCACGCTTT
lxh_05_F12	ATCTCTTCAG	ACTTAGGTTGGTTGCATCGC	CGATAGTGCTTCAATGGCGT
lxh_05_G01_1	ACCTTCCATT	CAGTACATGTGGGTGATGCC	GGAACGTTCTCAATTTCGCGT
lxh_05_G01_2	ACCTATGTCT	CGACCCAGATGTAGTTGTCT	ATGGCAGAGTCAAGGTAAATT
lxh_05_G01_3	AGTTAACGTC	GAGACTCGTATCTGCCGGTC	TGCAGTGGGAATGTGACCTC
lxh_05_G01_4	AGTTACACAG	TCTAGGAGCAGGTGTAGGGAC	ATCGGTGGGTTGCACTTCTT
lxh_05_G01_5	AGTTGTTAGC	TGGCTTCCTTAACACCACAA	TGCTCCTGATTCTTGCAACT
lxh_05_G01_6	AGTAGACTGA	TTGTTCCGTTCGTGGGGTC	GACAGTAAACACAGGCCGGA
lxh_05_G02_1	AGATACCTCA	GAGACTCGTATCTGCCGGTC	TGCAGTGGGAATGTGACCTC
lxh_05_G02_2	AGAATCAACC	TCTAGGAGCAGGTGTAGGGAC	ATCGGTGGGTTGCACTTCTT
lxh_05_G02_3	AGAACTCGTA	TGGCTTCCTTAACACCACAA	TGCTCCTGATTCTTGCAACT
lxh_05_G02_4	AGACTTCAAG	TTGTTCCGTTCGTGGGGTC	GACAGTAAACACAGGCCGGA
lxh_05_G03_1	AGACTATTGC	GAGACTCGTATCTGCCGGTC	TGCAGTGGGAATGTGACCTC
lxh_05_G03_2	AGCTCTATTC	TCTAGGAGCAGGTGTAGGGAC	ATCGGTGGGTTGCACTTCTT
lxh_05_G03_3	AGCTGATGAA	TGGCTTCCTTAACACCACAA	TGCTCCTGATTCTTGCAACT
lxh_05_G03_4	AGGTATGATG	TTGTTCCGTTCGTGGGGTC	GACAGTAAACACAGGCCGGA
lxh_05_G04_1	AGGTGAATCT	CAGTACATGTGGGTGATGCC	GGAACGTTCTCAATTTCGCGT
lxh_05_G04_2	AGGACATCTT	GAGACTCGTATCTGCCGGTC	TGCAGTGGGAATGTGACCTC
lxh_05_G04_3	CTTAACTCTG	TCTAGGAGCAGGTGTAGGGAC	ATCGGTGGGTTGCACTTCTT
lxh_05_G04_4	CTTCATTACC	TGCAGCCACAGGTCACCT	CGCCGGTAACCACTCACTAT
lxh_05_G04_5	CTTCCTACAA	TGGGATTGTTGGTTGTTCAGT	CGGATGGCCTGACTCGTAGA
lxh_05_G04_6	CTTGTTGAGA	TTGTTCCGTTCGTGGGGTC	GACAGTAAACACAGGCCGGA
lxh_05_G05_1	CTTGACATCT	CAGTACATGTGGGTGATGCC	GGAACGTTCTCAATTTCGCGT
lxh_05_G05_2	CTATGTCTGA	CGACCCAGATGTAGTTGTCT	ATGGCAGAGTCAAGGTAAATT
lxh_05_G05_3	CTAAGGAGAA	GAGACTCGTATCTGCCGGTC	TGCAGTGGGAATGTGACCTC
lxh_05_G05_4	CTAGTCTATC	TCTAGGAGCAGGTGTAGGGAC	ATCGGTGGGTTGCACTTCTT
lxh_05_G05_5	CTAGAGCAAT	TGCAGCCACAGGTCACCT	CGCCGGTAACCACTCACTAT
lxh_05_G05_6	CTCTGAATTG	TGGGATTGTTGGTTGTTCAGT	CGGATGGCCTGACTCGTAGA
lxh_05_G05_7	CTCATACCTT	TTGTTCCGTTCGTGGGGTC	GACAGTAAACACAGGCCGGA
lxh_05_G06_1	CTGTAATGAG	CAGTACATGTGGGTGATGCC	GGAACGTTCTCAATTTCGCGT
lxh_05_G06_2	CTGAAGGTTA	GAGACTCGTATCTGCCGGTC	TGCAGTGGGAATGTGACCTC
lxh_05_G06_3	CATATAGGTG	TCTAGGAGCAGGTGTAGGGAC	ATCGGTGGGTTGCACTTCTT
lxh_05_G06_4	CATAATCGCT	TGCAGCCACAGGTCACCT	CGCCGGTAACCACTCACTAT
lxh_05_G06_5	CATAGGTTAC	TGGGATTGTTGGTTGTTCAGT	CGGATGGCCTGACTCGTAGA
lxh_05_G06_6	CATCGAATCA	TTGTTCCGTTCGTGGGGTC	GACAGTAAACACAGGCCGGA
lxh_05_G07_1	CATGAACCAA	ATCCGCCTCCACAGTCAATG	CCGCACTTAACACGTCATGG
lxh_05_G07_2	CATGCGTATT	CACAGGTTTCTCGGGGACAG	CGTGGCCACTCAGAGTTTCT
lxh_05_G07_3	CAATTGACGT	CCATGACGTGTTAAGTGCGG	CGTGGGAAAGCAATTGGGTG
lxh_05_G07_4	CAATATGGAC	CTGTGAGCTCGTCCATCCAC	TGGCCGCCAAACATTACTTC
lxh_05_G08_1	CAATCATGCA	ATCCGCCTCCACAGTCAATG	CCGCACTTAACACGTCATGG
lxh_05_G08_2	CAACAAGAGA	CACAGGTTTCTCGGGGACAG	CGTGGCCACTCAGAGTTTCT
lxh_05_G08_3	CACTCAGTAT	CCATGACGTGTTAAGTGCGG	CGTGGGAAAGCAATTGGGTG
lxh_05_G08_4	CAGATCCTAA	CTGTGAGCTCGTCCATCCAC	TGGCCGCCAAACATTACTTC
lxh_05_G09_1	CAGGAATTGT	ATCCGCCTCCACAGTCAATG	CCGCACTTAACACGTCATGG
lxh_05_G09_2	CCTATCACAT	CACAGGTTTCTCGGGGACAG	CGTGGCCACTCAGAGTTTCT
lxh_05_G09_3	CCGATTGATT	CCATGACGTGTTAAGTGCGG	CGTGGGAAAGCAATTGGGTG
lxh_05_G09_4	CGTAATATGC	CTGTGAGCTCGTCCATCCAC	TGGCCGCCAAACATTACTTC
lxh_05_G10_1	AAGTGCTGTT	ATCCGCCTCCACAGTCAATG	CCGCACTTAACACGTCATGG
lxh_05_G10_2	AAGATGGTGT	CACAGGTTTCTCGGGGACAG	CGTGGCCACTCAGAGTTTCT
lxh_05_G10_3	AAGAAGTACC	CCATGACGTGTTAAGTGCGG	CGTGGGAAAGCAATTGGGTG
lxh_05_G10_4	AAGCCGTTAA	TGAGCTCGTCCATCCACCTA	GGCACCGCGTATTATTACCG
lxh_05_G11_1	AAGGTCATTC	CCAGTCGATCTACCGGGAGA	AACTCGCAACGGTACCATCA
lxh_05_G11_2	ACTTATCCGA	GTGAACCTGTACGTGTGGGT	TGGCTCTCGTGTAAAGTTGCA
lxh_05_G11_3	ACTAACGAGT	GTGCACGTGACAAGAGAGGA	GTTCTCACTACCGCTGCCAT
lxh_05_G11_4	ACATTCATGG	TCCGAAGACAAATAGTAGGGGT	ATAATACCCGGTGCCTTCGC
lxh_05_H01_1	GCTCACAATA	AGAGTTTCGTGACATGCGGT	ATAGTTACAACGGCTGCCCC
lxh_05_H01_2	GCTGCATTAA	CTCAGGGCAACTATAATGTACT	AGTTTTGAAATTGAAAAGGCCT
lxh_05_H01_3	GCATGTTCTT	TGTTGCTGAAATGTTGCCCG	TCGTTCTCCTTGAGCACAGG
lxh_05_H02	GCCTTATAGA	AGAGTTTCGTGACATGCGGT	ATAGTTACAACGGCTGCCCC
lxh_05_H03	GCGTATCAAT	AGAGTTTCGTGACATGCGGT	ATAGTTACAACGGCTGCCCC
lxh_05_H04_1	GGTATTCACA	AAGCGGACGTGGATGACATT	ACGTTTCTCACCATTTTGTTCT
lxh_05_H04_2	GGTATCTGTT	ACACGGCAAGAGACACGATT	TCATAGAGACGTCGCCATTAC
lxh_05_H04_3	TTCTGCCAAG	ACGTTGTCACATTTACCCACCT	CCACTGGAGGAAAATGTGCG
lxh_05_H04_4	TTCAATGCGC	CTCAGGGCAACTATAATGTACT	AGTTTTGAAATTGAAAAGGCCT
lxh_05_H05_1	TTGTAGACGG	CCACCCTACTATCCGCCCTA	ACACCTGTCTCGTTGCACAT
lxh_05_H05_2	TTGATCGGTC	AGAGATCAGTGCACGTGACA	ATGTTCTCACTACCGCTGCC
lxh_05_H05_3	TTGGAAGCCA	ACATAACCCGAGAGAAAGCT	GGATCCTGGATTGTCTGCGT
lxh_05_H06_1	TTGGCGTAAG	CCACCCTACTATCCGCCCTA	ACACCTGTCTCGTTGCACAT
lxh_05_H06_2	TACTGAGGTC	TCCGAAGACAAATAGTAGGGGT	ATAATACCCGGTGCCTTCGC
lxh_05_H07	TACAGTCACC	AGATGAGTGGACTACAAACGT	CAGTTTGGTCGAGGAGGGTT
lxh_05_H09_1	TACCTCCGTA	AGCTAACTCCAAGGCAATGC	ACGCTGCAATGAACAAAGCC
lxh_05_H09_2	TACCTGTAGC	CAATGAACAAAGCCGGGTCC	TGTTTGCTCTGACACCACGA
lxh_05_H09_3	TACGCCTTAC	TGAACAAATCCGGGTCCCTG	TGAGGTGCTAATTCCAAGGCA
lxh_05_H10_1	CGATTACACT	AGCTAACTCCAAGGCAATGC	ACGCTGCAATGAACAAAGCC
lxh_05_H10_2	GTTCTGGTAA	CAATGAACAAAGCCGGGTCC	TGTTTGCTCTGACACCACGA
lxh_05_H10_3	GTAAGCGTAT	TGAACAAATCCGGGTCCCTG	TGAGGTGCTAATTCCAAGGCA
lxh_05_H11_1	GTCGATATGA	AAGTGGGCAAGGATTCAGCT	GGCTGAAGATGGGACGCTAG
lxh_05_H11_2	GTGTCTTGTA	ACACGGCAAGAGACACGATT	TCATAGAGACGTCGCCATTAC
lxh_05_H11_3	GTGACAATCA	GGGGAAGTAAGTGAGCGGTG	GATGGATCAAACTGCACACGG
lxh_05_H11_4	GAACTGATTG	GTGCACGTGACAAGAGAGGA	GTTCTCACTACCGCTGCCAT
lxh_05_H11_5	GAACCTTACT	TCCGAAGACAAATAGTAGGGGT	ATAATACCCGGTGCCTTCGC
lxh_05_H12	GAAGACAGAT	ACACGGCAAGAGACACGATT	TCATAGAGACGTCGCCATTAC
lxh_06_A01_1	TGTGAGTTCG	ACACGGCAAGAGACACGATT	TCATAGAGACGTCGCCATTAC
lxh_06_A01_2	TGATGCAGGT	GTGCACGTGACAAGAGAGGA	GTTCTCACTACCGCTGCCAT
lxh_06_A01_3	TGAGCGGATA	TCCGAAGACAAATAGTAGGGGT	ATAATACCCGGTGCCTTCGC
lxh_06_A02_1	TGCTTCTCTC	AAGCGGACGTGGATGACATT	ACGTTTCTCACCATTTTGTTCT
lxh_06_A02_2	TGCTAACTGG	AGTGAACTAAAGGAAGCAGGT	ACTGAAAAGACTGCTGCTGT
lxh_06_A02_3	ATTCCGGATC	TGAGCAACAGTACCATCGGA	TGATGTCACTGTCCAAAGTAGT
lxh_06_A03_1	ATCCGTGACA	AAGCGGACGTGGATGACATT	ACGTTTCTCACCATTTTGTTCT
lxh_06_A03_2	ATGTACAGCC	AGTGAACTAAAGGAAGCAGGT	ACTGAAAAGACTGCTGCTGT
lxh_06_A03_3	ATGTGTCCTC	TGAGCAACAGTACCATCGGA	TGATGTCACTGTCCAAAGTAGT
lxh_06_A04	AACACTCCGT	GAAACAAGAACTCGATGCCCA	CCAAACCAGGCTTTAAGACAGA
lxh_06_A06_1	AAGAGACGAC	ACACGGCAAGAGACACGATT	TCATAGAGACGTCGCCATTAC
lxh_06_A06_2	AAGCAAGTCG	CCACCCTACTATCCGCCCTA	ACACCTGTCTCGTTGCACAT
lxh_06_A06_3	ACTTCCGGTA	GTGCACGTGACAAGAGAGGA	GTTCTCACTACCGCTGCCAT
lxh_06_A06_4	ACTAGTGCTG	TCCGAAGACAAATAGTAGGGGT	ATAATACCCGGTGCCTTCGC
lxh_06_A07_1	ACTCTACGCA	ACACGGCAAGAGACACGATT	TCATAGAGACGTCGCCATTAC
lxh_06_A07_2	ACTCAGTCCT	CCACCCTACTATCCGCCCTA	ACACCTGTCTCGTTGCACAT
lxh_06_A07_3	ACATCTCACC	GTGCACGTGACAAGAGAGGA	GTTCTCACTACCGCTGCCAT
lxh_06_A07_4	ACATGACCAG	TCCGAAGACAAATAGTAGGGGT	ATAATACCCGGTGCCTTCGC
lxh_06_A09_1	ACAACCTGAG	ACACGGCAAGAGACACGATT	TCATAGAGACGTCGCCATTAC
lxh_06_A09_2	ACAGCAACTC	CCACCCTACTATCCGCCCTA	ACACCTGTCTCGTTGCACAT
lxh_06_A09_3	ACCTAGAAGC	GTGCACGTGACAAGAGAGGA	GTTCTCACTACCGCTGCCAT
lxh_06_A09_4	ACGGTCTACA	TCCGAAGACAAATAGTAGGGGT	ATAATACCCGGTGCCTTCGC
lxh_06_A10	AGTGTTGGCT	ACACGGCAAGAGACACGATT	TCATAGAGACGTCGCCATTAC
lxh_06_A11_1	AGATCGTCGA	ACACGGCAAGAGACACGATT	TCATAGAGACGTCGCCATTAC
lxh_06_A11_2	TTATTACCGC	CCACCCTACTATCCGCCCTA	ACACCTGTCTCGTTGCACAT
lxh_06_A11_3	TTATTCTGCG	GTGCACGTGACAAGAGAGGA	GTTCTCACTACCGCTGCCAT
lxh_06_A11_4	TTATAGGTCC	TCCGAAGACAAATAGTAGGGGT	ATAATACCCGGTGCCTTCGC
lxh_06_B01_1	TTACATCCTG	AGCACAGTGACAGCAGACAG	CCCTAATGTGGCCAATATCAGT
lxh_06_B01_2	TTACACAAGC	CGTCAGTAGCACCGACTCAT	CCCCTGGAAGCTGTGAGTTT
lxh_06_B01_3	TTACCAGGAA	TTCTTCATTCACAGGGCACT	TGGTTCCCATTGTGAAAACGG
lxh_06_B02	TTAGAGTGGA	TTCTCTTTGCCGTCGTCTCG	GCAACGCATGAAGACTCCAC
lxh_06_B03_1	TTAGCCATTG	GCCGGATCAGCTAGTTGTGT	CGGCCCACCTGATGTTAAGT
lxh_06_B03_2	TTAGGTTCAC	GCCGGATCAGCTAGTTGTGT	CTACAACGTAAATGCCGCCC
lxh_06_B03_3	TTCTTCGTGT	TTCTCTTTGCCGTCGTCTCG	GCAACGCATGAAGACTCCAC
lxh_06_B06	TTCTTGAGAC	TACCGACAAACAGAGCCACG	TTTTCTTCGAGCTAGCCGGG
lxh_06_B09	TTCTCATACC	CTTCCTGCACCTTGTCCGTA	GTGCAGGAACAGGCTCTTCT
lxh_06_B10	TTCATCACCA	CACCTTGTCCGTATCCCCTG	GTGCAGGAACAGGCTCTTCT
lxh_06_B11	TTCACGCTAA	TGAGCAACAGTACCATCGGA	TGATGTCACTGTCCAAAGTAGT
lxh_06_C03	TATTATGCCG	CTTCCTGCACCTTGTCCGTA	GTGCAGGAACAGGCTCTTCT
lxh_06_C08	TATTCACGAG	TTCTCATCGAAAACGCCAGC	ACTACGATATGGATTGCAACGG
lxh_06_C09	TATTCGACTC	TTCTCATCGAAAACGCCAGC	ACTACGATATGGATTGCAACGG
lxh_06_C10	TATTGCCTCT	CCGTTCTACTCTTGATCTGTGA	ATGACTGACGGGAAGTTGGC
lxh_06_C11	TATATCCAGG	TTGTGCTGCCAGTCTAGTCC	GTTGTTGGGCGCGTTTATCT
lxh_06_D04	TACTCCAAGA	TGTCTCGTTGTATCTGTCGTCC	CGTCACCCGCAGTTATAGTC
lxh_06_D05	TACAACGTTG	TCTTGCCTACTTTTGACGCA	GTTCGGTTCCAACTCTCAAGA
lxh_06_D06	TAGAACACAC	TCTTGCCTACTTTTGACGCA	GTTCGGTTCCAACTCTCAAGA
lxh_06_D07	TAGACAAGGT	TGTTCGACGACTATTGCTGA	ACAGCTGTTCTTTGAAGGGT
lxh_06_D09_1	TCTTGAATGC	AAAATGTACTCCGTGGTTGT	AAACACACATTCGACGCTGC
lxh_06_D09_2	TCTTGGTCAA	CGGCAGAAACAAACGCACTT	GCGCCATCTATGTCCCGAA
lxh_06_D11	TCTATAGCGA	TGTTCGACGACTATTGCTGA	ACAGCTGTTCTTTGAAGGGT
lxh_06_D12	TCTACCTATC	GCGAGATGAAGCAGATGACAC	GGATATAGCAGACGTGAAGGC
lxh_06_E01	TCGCGTTATA	GCGAGATGAAGCAGATGACAC	GGATATAGCAGACGTGAAGGC
lxh_06_E02	TCGGATACTT	GCACCAGAAGCAGCTCCATA	GGTAACGAGTCCATTGTAGAGG
lxh_06_E04_1	TGTAGTACCT	AAACAACACCTTCCTAACGT	CTCAGCCAGTTGTTTTATAGGA
lxh_06_E05	TGTCCTAATG	CGGCAGAAACAAACGCACTT	GCGCCATCTATGTCCCGAA
lxh_06_E06	TGTGTCATGA	CAGAAGCCAAAACTGCCACA	TTACCGCCAAACAAACGTGC
lxh_06_E07	TGTGGCTAAT	GCACTGCTACTGAGATAAGGCT	GCGGCCCGTCTGATATTACT
lxh_06_E08	TGGATATACG	GCACTGCTACTGAGATAAGGCT	GCGGCCCGTCTGATATTACT
lxh_06_E10_1	ATTATTCGGC	TCTTGCCTACTTTTGACGCA	TTTGTGATCTTGTGCTGCGC
lxh_06_E10_2	ATTATCGTCG	TGATTTGGAAGTTGAAGCCA	GGCAGCGGTGATCAAATTCC
lxh_06_E11	ATTACAACGG	ACTGCCTCCAACTTGAAGCT	TCCAGGGGAAGGGTTTAGGT
lxh_06_E12	ATTACGTGCA	TCGCCCAACCTGTGAGAAAA	ACTCGAAATTGTCTTCACTGGG
lxh_06_F01	ATCAAGTTGG	CCAATGTCGCGGCAAATTCT	CGCTTCCTAAGAACGTGTTTGT
lxh_06_F02	ATCACCAGTT	CGCCTCCGTCGAATGTGATA	GCAAAACAAGAGCGTCCACA
lxh_06_F04	ATCCAATCTC	GGAGGGCGATGAAGATACCG	AGAACTCACGCGTCACTTCC
lxh_06_F05	ATCGCAGTTA	CTACAGCTAGACACCGCGC	AGTTTAAGACGTCCCTGGCTG
lxh_06_F06_1	ATGTTGCTAG	AGGGTCCCGATTTCCTCCAA	TCGCCATCCTCAACGTTCAA
lxh_06_F06_2	ATGTCACAGA	AGGGTCCCGATTTCCTCCAA	TCGCCATCCTCAACGTTCAA
lxh_06_F06_3	ATGACTGTAC	CGAGTCCTCATATCTCACGTGT	CCGTGGACTGGGCTTTACTC
lxh_06_F07_1	ATGCTCGAAT	ATCCGCCTCCACAGTCAATG	CCGCACTTAACACGTCATGG
lxh_06_F07_2	ATGCGAAGTA	CACAGGTTTCTCGGGGACAG	CGTGGCCACTCAGAGTTTCT
lxh_06_F07_3	AATTCCTACG	CCATGACGTGTTAAGTGCGG	CGTGGGAAAGCAATTGGGTG
lxh_06_F07_4	AATTGGAGGA	TGAGCAACAGTACCATCGGA	TGATGTCACTGTCCAAAGTAGT
lxh_06_F07_5	AATACGCTTG	TGAGCTCGTCCATCCACCTA	GGCACCGCGTATTATTACCG
lxh_06_F08	AGAGTGCCTT	ACACGGCAAGAGACACGATT	TCATAGAGACGTCGCCATTAC
lxh_06_F12_1	AGCAACGGAC	TGAGCTCGTCCATCCACCTA	GGCACCGCGTATTATTACCG
lxh_06_F12_2	AGCCGGTATT	ACTGACACGAATTTGGTTTGAC	AAGAGCTCAATGTGCACAAC
lxh_06_F12_3	AGCCTGATCA	TGAGCTCGTCCATCCACCTA	GGCACCGCGTATTATTACCG
lxh_06_G01_1	ACATTGTGTC	ACACGGCAAGAGACACGATT	TCATAGAGACGTCGCCATTAC
lxh_06_G01_2	ACAACGATCT	ACCAATAATTAGGGACCCAGT	TGATCTCTACACAATGAACTGG
lxh_06_G01_3	ACACAAGGTT	ACTGACACGAATTTGGTTTGAC	AAGAGCTCAATGTGCACAAC
lxh_06_G01_4	AGCGCACAAC	ACCAATAATTAGGGACCCAGT	TGATCTCTACACAATGAACTGG
lxh_06_G01_5	ATAGACGCGG	ACTGACACGAATTTGGTTTGAC	AAGAGCTCAATGTGCACAAC
lxh_06_G01_6	ATAGCGCTGC	ACACGGCAAGAGACACGATT	TCATAGAGACGTCGCCATTAC
lxh_06_G04_1	ACAGATAGCA	ATCCGCCTCCACAGTCAATG	CCGCACTTAACACGTCATGG
lxh_06_G04_2	ACAGGTGAAT	TGAGCTCGTCCATCCACCTA	GGCACCGCGTATTATTACCG
lxh_06_G04_3	ATGCAGCGGT	TGAGCTCGTCCATCCACCTA	GGCACCGCGTATTATTACCG
lxh_06_G04_4	CAACTCGTCC	ATCCGCCTCCACAGTCAATG	CCGCACTTAACACGTCATGG
lxh_06_G05_2	CACCATGCTT	TGAGCTCGTCCATCCACCTA	GGCACCGCGTATTATTACCG
lxh_06_G05_3	CAGACTTAGG	ACTGACACGAATTTGGTTTGAC	AAGAGCTCAATGTGCACAAC
